# Supplementary material for: Low‐Density Lipoprotein Receptor‐Related Protein 6 Cell Surface Availability Regulates Fuel Metabolism in Astrocytes
Source: PubMed Central journal article supplement (PMC8373092; doi:10.1002/advs.202004993), 2021-06-27
Supplement: ADVS-8-2004993-s001.pdf [file ADVS-8-2004993-s001.pdf]

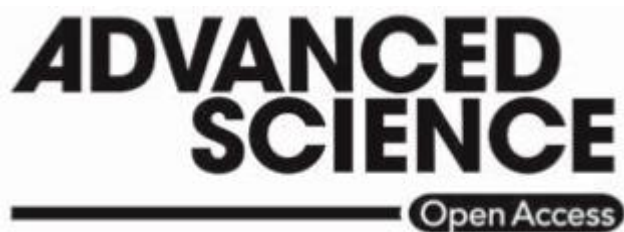

## Supporting Information

for *Adv. Sci.*, DOI: 10.1002/adv.202004993

### Low-density lipoprotein receptor-related protein 6 cell surface availability regulates fuel metabolism in astrocytes

Hei-Man CHOW,\* Jacquelyne Ka-Li SUN, Ronald P. HART, Kenneth King-Yip CHENG,  
Clara H.L. HUNG, Tsun-Ming LAU, Kin-Ming KWAN

## Supporting Information

### Low-density lipoprotein receptor-related protein 6 cell surface availability regulates fuel metabolism in astrocytes

Hei-Man CHOW<sup>1,\*</sup>  
Jacquelyne Ka-Li SUN<sup>1</sup>  
Ronald P. HART<sup>2</sup>  
Kenneth King-Yip CHENG<sup>3</sup>  
Clara H.L. HUNG<sup>4</sup>  
Tsun-Ming LAU<sup>1</sup>  
Kin-Ming KWAN<sup>1</sup>

<sup>1</sup>School of Life Sciences, Faculty of Science, The Chinese University of Hong Kong, Hong Kong.

<sup>2</sup>Department of Cell Biology and Neuroscience, Rutgers University, Piscataway, New Jersey, USA

<sup>3</sup>Department of Health Technology and Informatics, The Hong Kong Polytechnic University, Hong Kong

<sup>4</sup>The University Research Facility in Life Sciences, The Hong Kong Polytechnic University, Hong Kong

\* To whom correspondence should be addressed:

Hei-Man CHOW

Email: [heimanchow@cuhk.edu.hk](mailto:heimanchow@cuhk.edu.hk)

Phone: (+852)3943-1530

## Contents of supporting information

Supplementary Figure: 1-8

Supplementary Table: 1-11

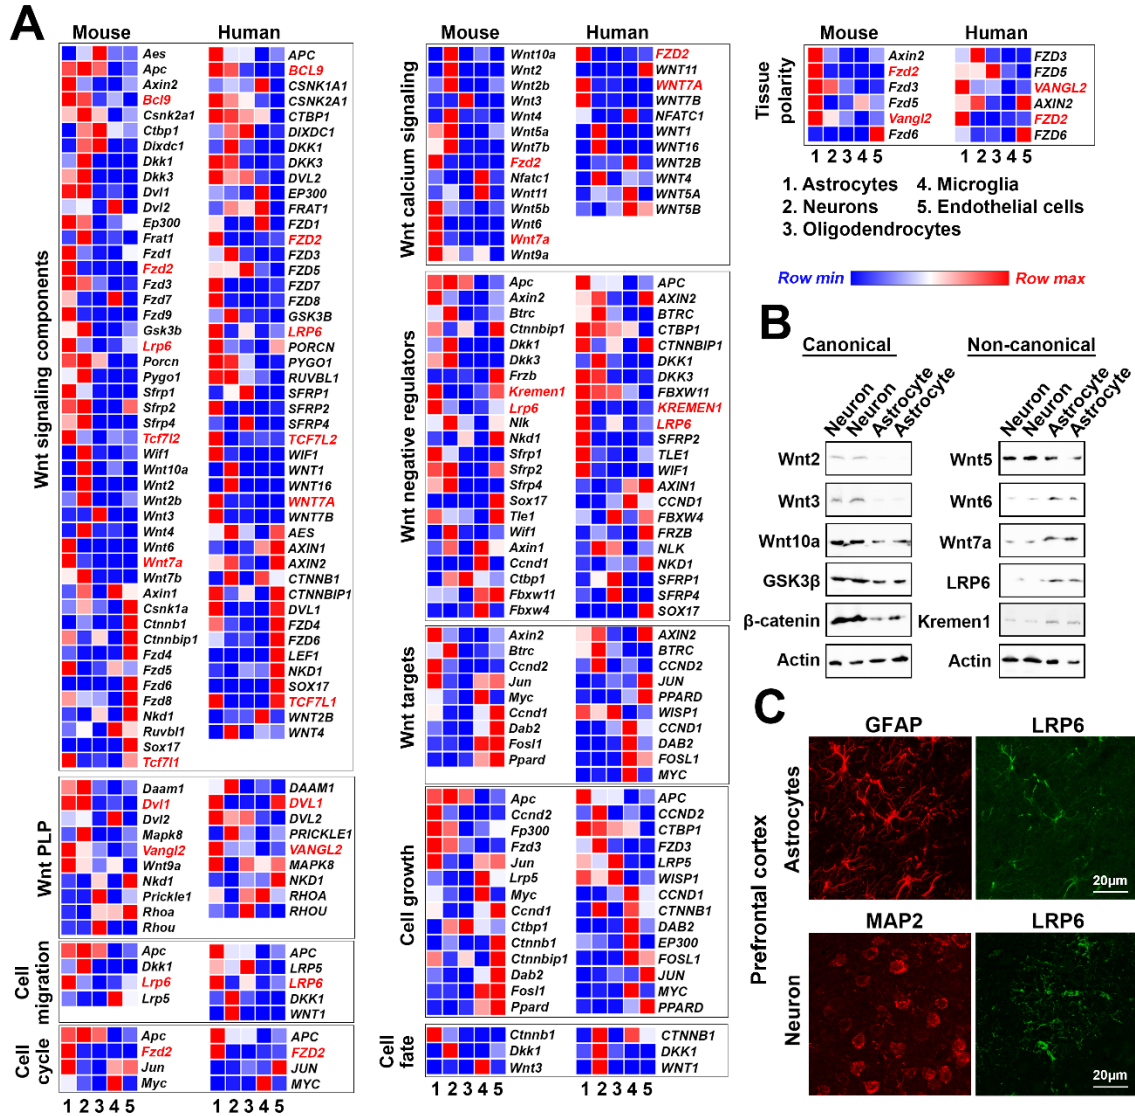

**Supplementary Figure 1. Wnt signaling network in the brain.**

(A) With reference to the data available on Brain RNA-Seq portal (<https://www.brainrnaseq.org>), relative expression levels of the complete lists of Wnt signaling components, regulators and downstream targets were compared among various mature brain cell types. Red highlights are genes commonly enriched in both human and mouse astrocytes. (B) Representative immunoblots of the canonical and non-canonical Wnt signaling components in mouse primary cortical neurons and freshly enriched astrocytes (N=6). (C) Representative immunohistochemistry images of the mouse frontal cortex regions showing LRP6 signals co-stained with either GFAP-astrocyte or MAP2-neuronal markers (N=6).

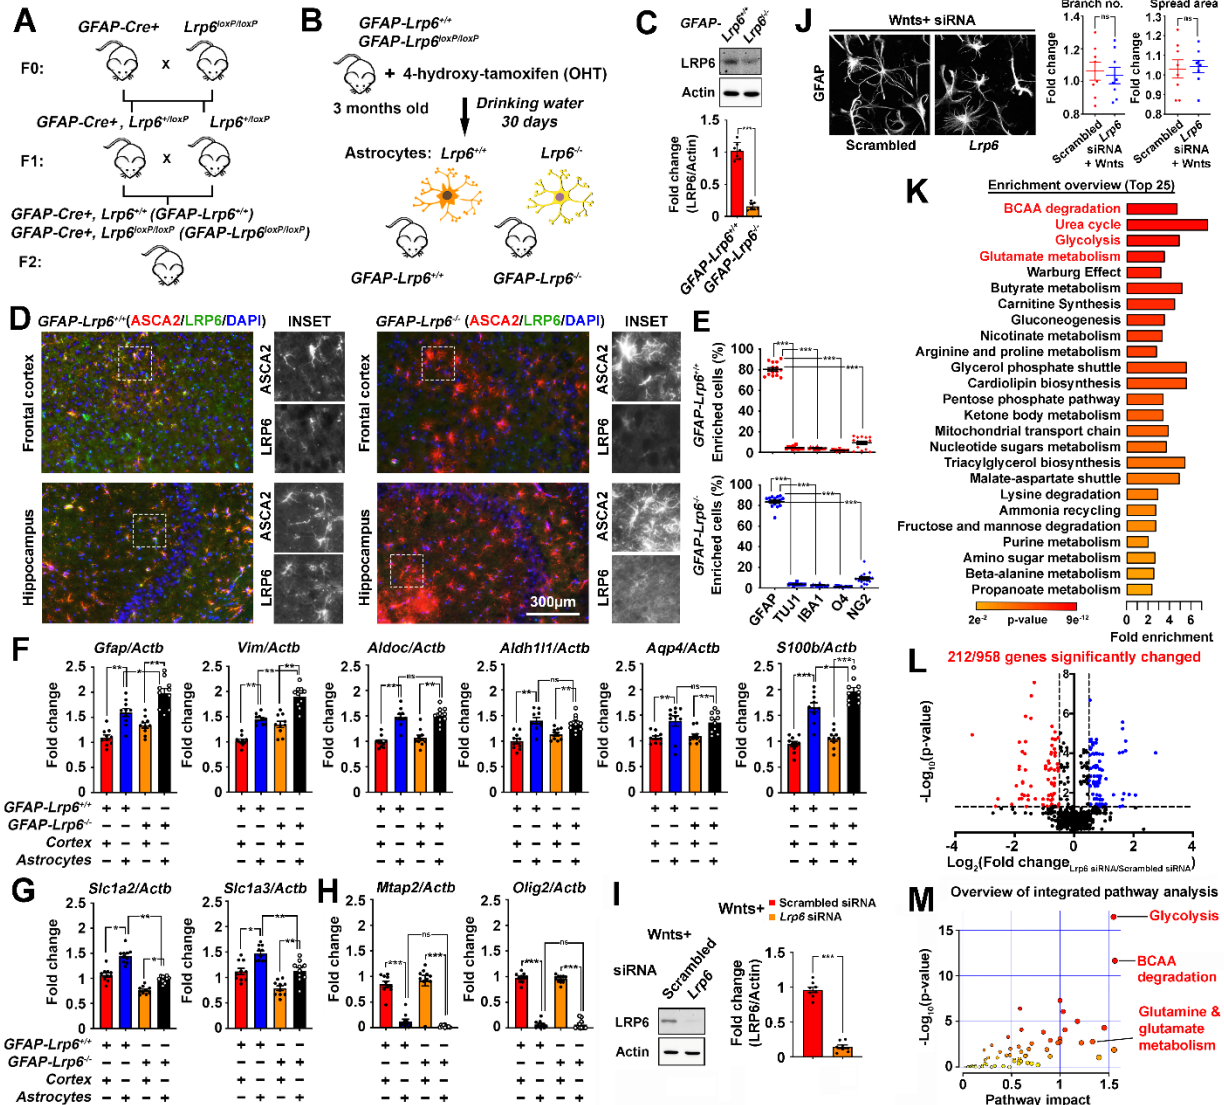

## Supplementary Figure 2. Workflows of adult astrocyte-specific *Lrp6*-knockdown and enrichment of primary astrocytes.

(A-B) Schematic diagrams showing (A) the breeding scheme which F0 transgenic mice harboring two-floxed *Lrp6* allele were crossed with mice that express Cre-recombinase under the control of *GFAP* promoter. The double heterozygous (*GFAP-Cre+*, *Lrp6*<sup>+/*loxP*</sup>) F1 progeny was then crossbred with the *Lrp6* single-floxed mice (*Lrp6*<sup>+/*loxP*</sup>) of the same progeny to generate pups of *GFAP-Cre+*, *Lrp6*<sup>+/*+*</sup> (*GFAP-Lrp6*<sup>+/*+*</sup>) and *GFAP-Cre+*, *Lrp6*<sup>*loxP/loxP*</sup> (*GFAP-Lrp6*<sup>*loxP/loxP*</sup>) genotypes. (B) By three months of age, induction of *GFAP*-promoter driven Cre-recombinase was performed through oral administration of 25  $\mu$ g/ml 4-hydroxy-tamoxifen (OHT) for 30 consecutive days in drinking water, which allows sufficient time to induce the knockout out of *Lrp6* in astrocytes. (C) Representative immunoblots of LRP6 protein level in both cortical tissue of *GFAP-Lrp6*<sup>+/*+*</sup> and *GFAP-Lrp6*<sup>-/-</sup> mice. Quantification shown on the right (N=7, P<0.0001, two-tailed unpaired t-test). (D) Representative immunohistochemistry images showing the effect of 30 days OHT administration on LRP6 protein expression in astrocytes located at both the frontal cortex and hippocampus regions. (E) Quantification of immunopanning enriched cells immune-labelled

with various brain cell markers (Astrocyte—GFAP; neuron—TUJ1; microglia—IBA1; oligodendrocytes—O4; pericytes—NG2) in enriched astrocyte cultures (N=14; \*\*\*P<0.0001; one-way ANOVA). (F-H) Quantitative PCR was performed to characterize various markers of (F) astrocyte cytoskeleton and cytoplasm; (G) astrocyte glutamine-glutamate transporter system; as well as (H) neurons and oligodendrocytes in both cortex tissues and enriched astrocytes harvested from *GFAP-Lrp6<sup>+/+</sup>* and *GFAP-Lrp6<sup>-/-</sup>* mice (N=10, \*\*\*P<0.0001; \*\*P<0.001; \*P<0.01; ns=non-significant; one-way ANOVA). (I) Representative immunoblots of LRP6 protein level in Wnts-treated astrocytes pre-overexpressing Lrp6-specific siRNA for 72 hours. Quantification shown on the right (N=8, P<0.0001, two-tailed unpaired t-test). (J) representative immunocytochemistry images showing the morphologies of Wnts-treated astrocytes pre-overexpressing Lrp6-specific siRNA for 72 hours. Quantification of branch number and spreading area are shown on the right (N=8, P<0.0001, two-tailed unpaired t-test). (K) Global metabolic profiling of Wnts-treated astrocytes pre-overexpressing Lrp6-specific siRNA for 72 hours, followed by the Metabolite Set Enrichment Analysis (MESA) (N=6). Pathways are ranked by significance values. (L) qPCR analyses of 958 mouse KEGG metabolic-related genes expression in the same cells mentioned in (K) (N=6; horizontal dotted line P=0.05; two-tailed unpaired t-test). (M) Integrated metabolites and gene expression analyses was performed on MetaboAnalyst. Top 3 significant pathways with the greatest impact are labelled. Values represent the Mean ± SEM.

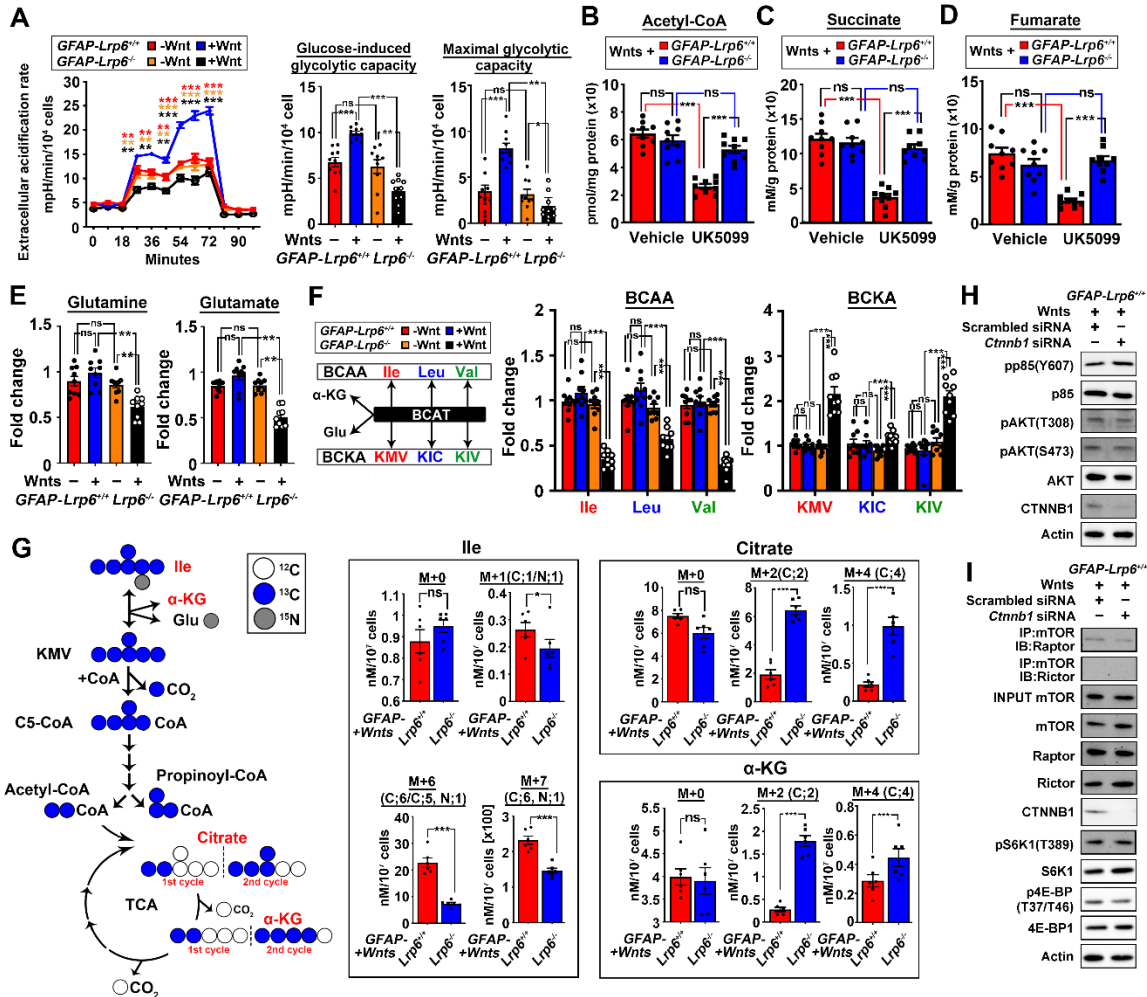

### Supplementary Figure 3. Metabolic profiling of Wnt-stimulated *GFAP-Lrp6*<sup>+/+</sup> and *GFAP-Lrp6*<sup>-/-</sup> astrocytes

(A) Glycolytic functions of cultured astrocytes were analyzed (N=10, \*\*\*P<0.0001; \*P<0.01; ns=non-significant; One-way ANOVA). (B-E) Intracellular levels of (B) acetyl-CoA, (C) succinate, (D) fumarate and (E) glutamine and glutamate in Wnt-exposed astrocyte cultures were measured by colorimetric assays [N=9, \*\*\*P<0.0001; \*\*P<0.01; ns=non-significant; One-way ANOVA for (B-D); two-tailed unpaired t-test for (E)]. (F) Quantities of intracellular BCAAs and BCKAs in astrocyte cultures were determined by GC-MS. Relative fold differences are shown (N=6, \*\*\*P<0.0001; ns=non-significant; One-way ANOVA). (G) Schematic representation of isoleucine oxidative reactions linking towards the TCA cycle. Filled blue circles represent <sup>13</sup>C atoms; grey ones represent the <sup>15</sup>N atom derived from [<sup>13</sup>C<sub>6</sub>, <sup>15</sup>N-Isoleucine] whereas white circles represent <sup>12</sup>C atoms derived from non-labelled metabolites in the system. On the right are mass isotopologue analyses of isoleucine (Ile); citrate and α-ketoglutarate (α-KG) in Wnts-treated astrocytes exposed to [<sup>13</sup>C<sub>6</sub>, <sup>15</sup>N-Isoleucine] for 2 hours (N=6, \*\*\*P<0.0001, \*P<0.01, ns=non-significant, two-tailed unpaired t-test). (H-I) Representative immunoblots of Wnts-treated *GFAP-Lrp6*<sup>+/+</sup> astrocyte cultures having *Ctnnb1* knockdown for 72 hours prior harvesting. Values represent the Mean ± SEM.

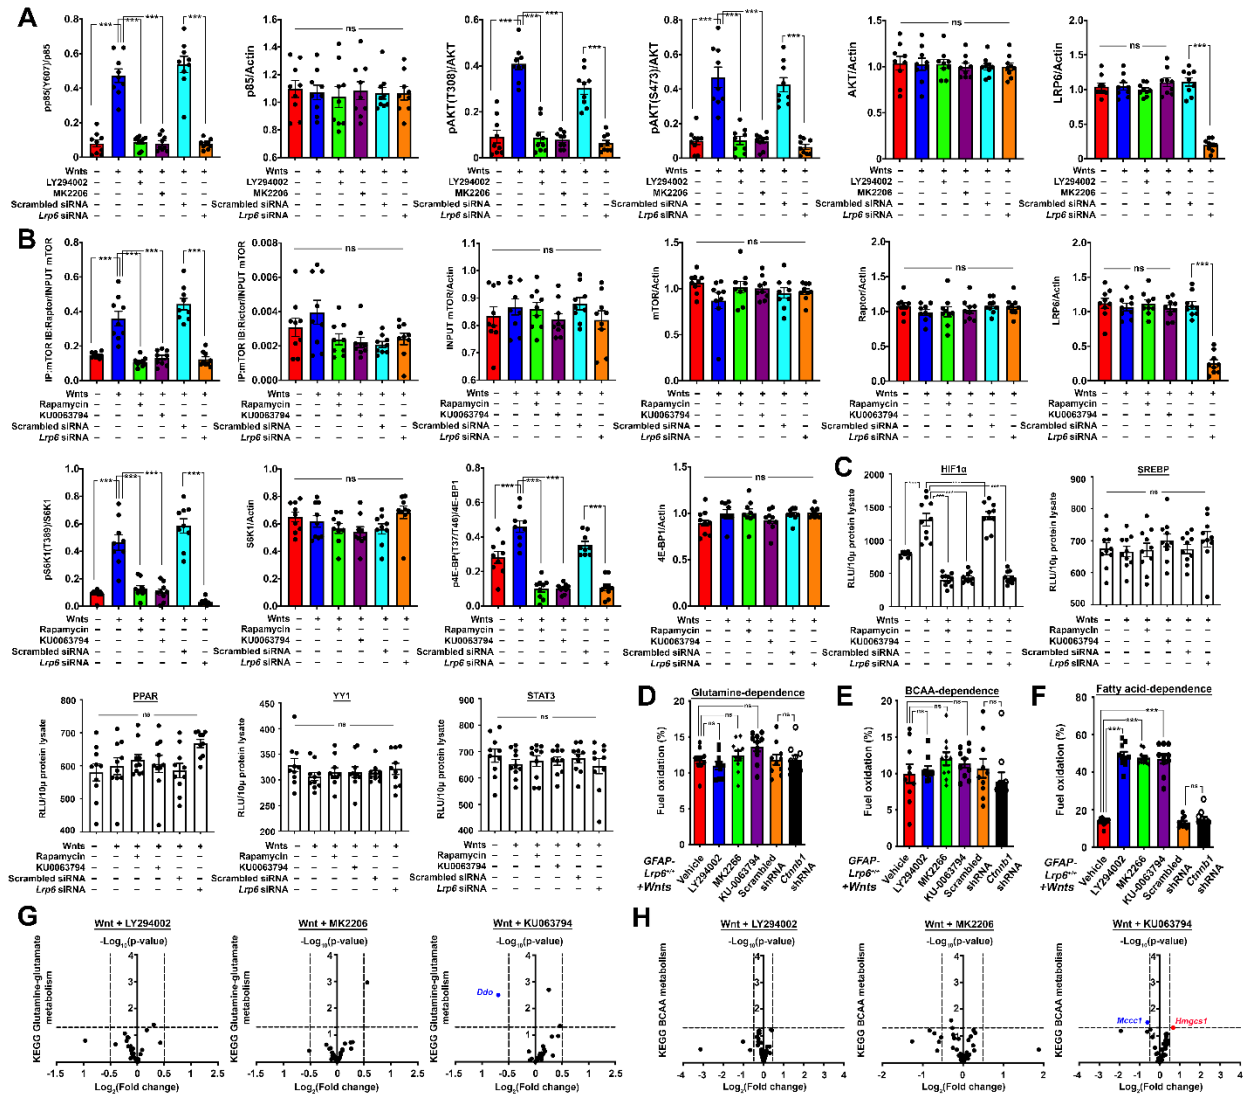

### Supplementary Figure 4. Immunoblot quantifications and metabolic reprogramming of astrocytes when the Wnt-LRP6 mediated PI3K-AKT-mTOR axis is blocked

(A-B) Quantification of immunoblots in (A) Figure 3B and (B) 3C; each was normalized against the corresponding internal controls (N=8; \*\*\*P<0.0001; ns=non-significant; one-way ANOVA). (C) Luciferase reporter assays were performed in Wnt ligands or vehicle exposed *GFAP-Lrp6*<sup>+/+</sup> astrocytes pre-transfected with various transcription factor (i.e. HIF1 $\alpha$ ; SREBP; PPAR and YY1) nuclear activities reporters for 24 hours, followed by mTOR pharmacological inhibitor treatment (Lanes 1-4) for another 24 hours. Lanes 5-6 corresponded to cells co-transfected with scrambled or *Lrp6* siRNA with various transcription factor nuclear reporters indicated prior harvesting (N=10, \*\*\*P<0.0001; ns=non-significant; one-way ANOVA). (D-F) Fuel dependence was evaluated in Wnts-exposed *GFAP-Lrp6*<sup>+/+</sup> astrocytes pre-treated with 10 $\mu$ M LY294002; 1nM MK2206; 10nM KU-0063794 for 24 hours; or having *Ctnnb1* knockdown for 72 hours were analysed. The relative (D) glutamine; (E) BCAA and (F) fatty acid-dependence were evaluated (N=10, \*\*\*P<0.0001; ns=non-significant; One-way ANOVA). (G-H) Volcano plot showing the comparisons of (G) 32 KEGG glutamine-glutamate metabolic pathway genes and (H) 44 KEGG

BCAA degradation pathways gene expression levels obtained from qPCR analysis in Wnt-exposed *GFAP-Lrp6<sup>+/+</sup>* astrocytes pre-treated with 10 $\mu$ M LY294002; 1nM MK2206; 10nM KU-0063794 for 24 hours (N=6; horizontal dotted line p=0.05; two-tailed unpaired t-test). Red highlights indicate upregulated and blue ones indicated downregulated genes. Values represent the Mean  $\pm$  SEM.



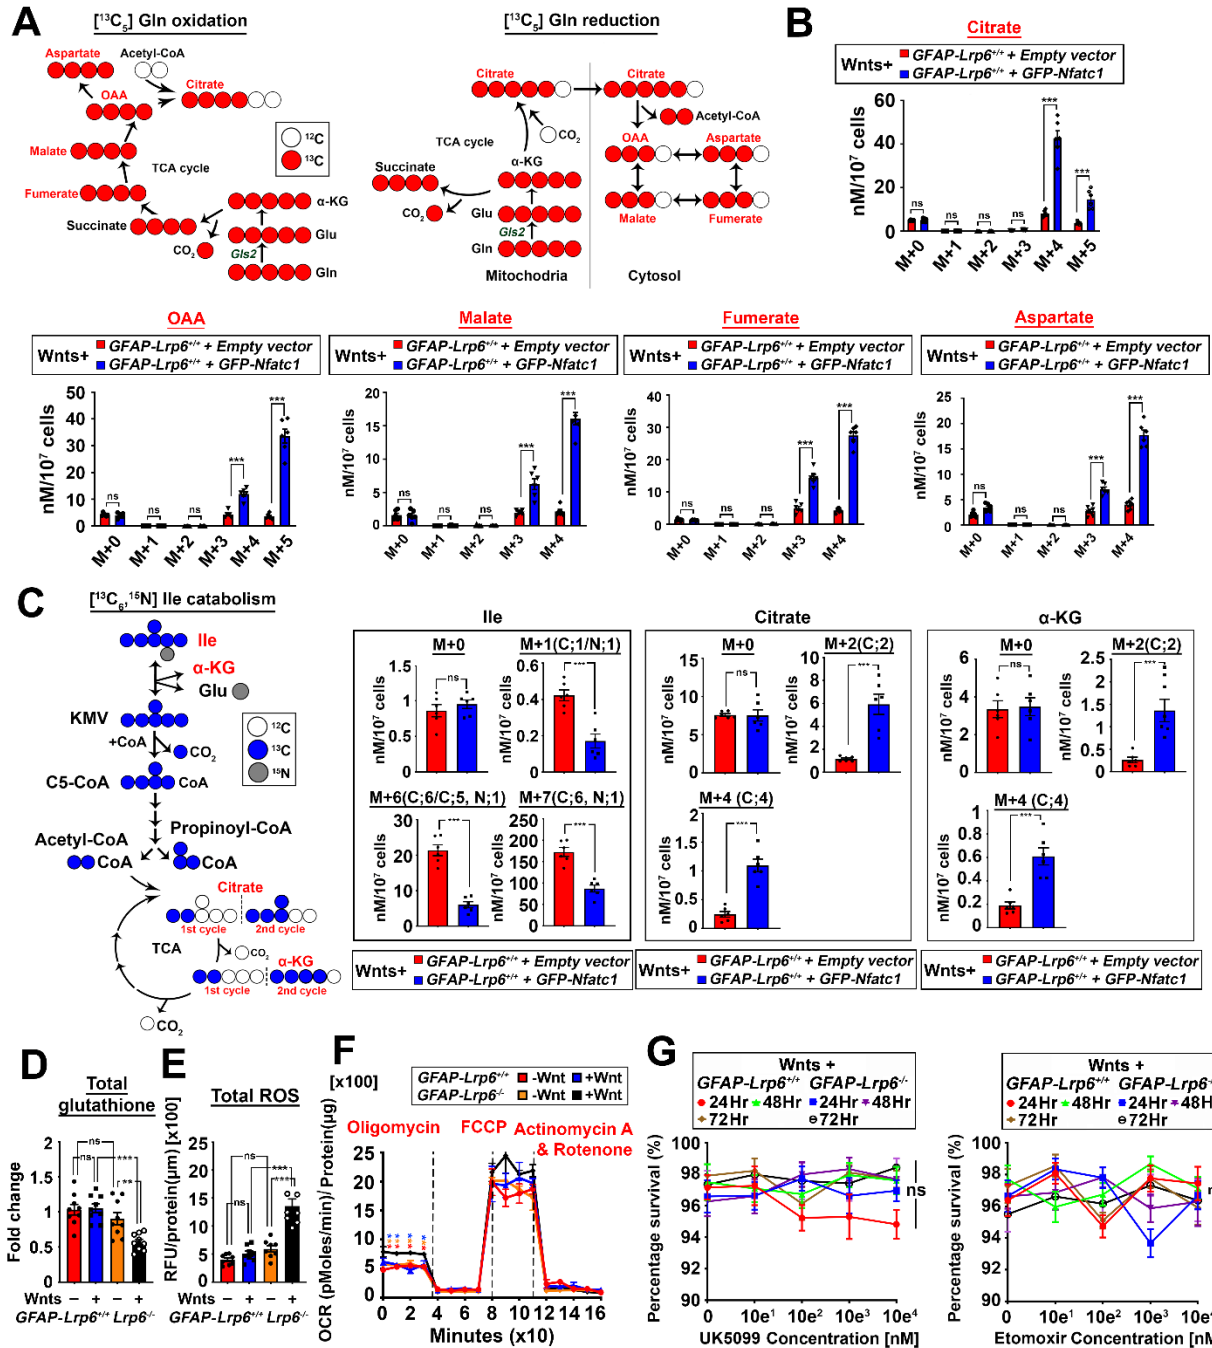

### Supplementary Figure 5. Activation of NFAT1 drives metabolic adaptations to glutamine and BCAAs metabolisms in astrocytes

(A) Schematic representation of oxidative (Left) and reductive (right) reactions of glutamine-glutamate- $\alpha$ -ketoglutarate flux. Filled red circles represent  $^{13}\text{C}$  atoms derived from  $[^{13}\text{C}_5]$ -glutamine; white circles represent  $^{12}\text{C}$  atoms derived from non-labelled metabolites within the system. (B) Mass isotopologue analysis of citrate; oxaloacetate (OAA); malate; fumarate and aspartate in Wnts-treated GFAP-Lrp6<sup>+/+</sup> astrocytes with or without ectopic expression of GFP-tagged Nfatc1 for 48 hours,  $[U-^{13}\text{C}]$ -glutamine was then incubated for 2 hours prior harvesting (N=6, \*\*\*P<0.0001, ns=non-significant, two-tailed unpaired t-test). (C) Schematic

representation of isoleucine oxidative reactions linking to the TCA cycle. Filled blue circles represent  $^{13}\text{C}$  atoms and grey ones represent  $^{15}\text{N}$  atom derived from [ $^{13}\text{C}_6$ ;  $^{15}\text{N}$ -Isoleucine]; white circles represent  $^{12}\text{C}$  atoms derived from non-labelled metabolites in the system. On the right are mass isotopologue analyses of isoleucine (Ile); citrate and  $\alpha$ -ketoglutarate ( $\alpha$ -KG) in Wnt ligands exposed *GFAP-Lrp6<sup>+/+</sup>* astrocytes with or without ectopic expression of GFP-tagged *Nfatc1* for 48 hours. [ $^{13}\text{C}_6$ ;  $^{15}\text{N}$ -Isoleucine] was incubated for 2 hours prior harvesting (N=6, \*\*\*P<0.0001, ns=non-significant, two-tailed unpaired t-test). (D) Total glutathione and (E) ROS levels in astrocyte cultures were determined (N=6, \*\*\*P<0.0001, \*\*P<0.001, ns=non-significant, one-way ANOVA). (F) Oxygen consumption rates of astrocyte cultures were determined by Seahorse Mito Stress Test (N=8; \*\*\*P<0.01, coloured asterisk represent comparison between black datapoint with corresponding coloured datapoint, one-way ANOVA at corresponding time point). (G) Cell survival curves of Wnts-treated astrocyte cultures treated with various dosages of mitochondrial pyruvate carrier inhibitor UK5099 or fatty acid oxidation inhibitor Etomoxir for 24, 48 and 72 hours (N=6, ns=non-significant, Two-way ANOVA) Values represent the Mean  $\pm$  SEM.

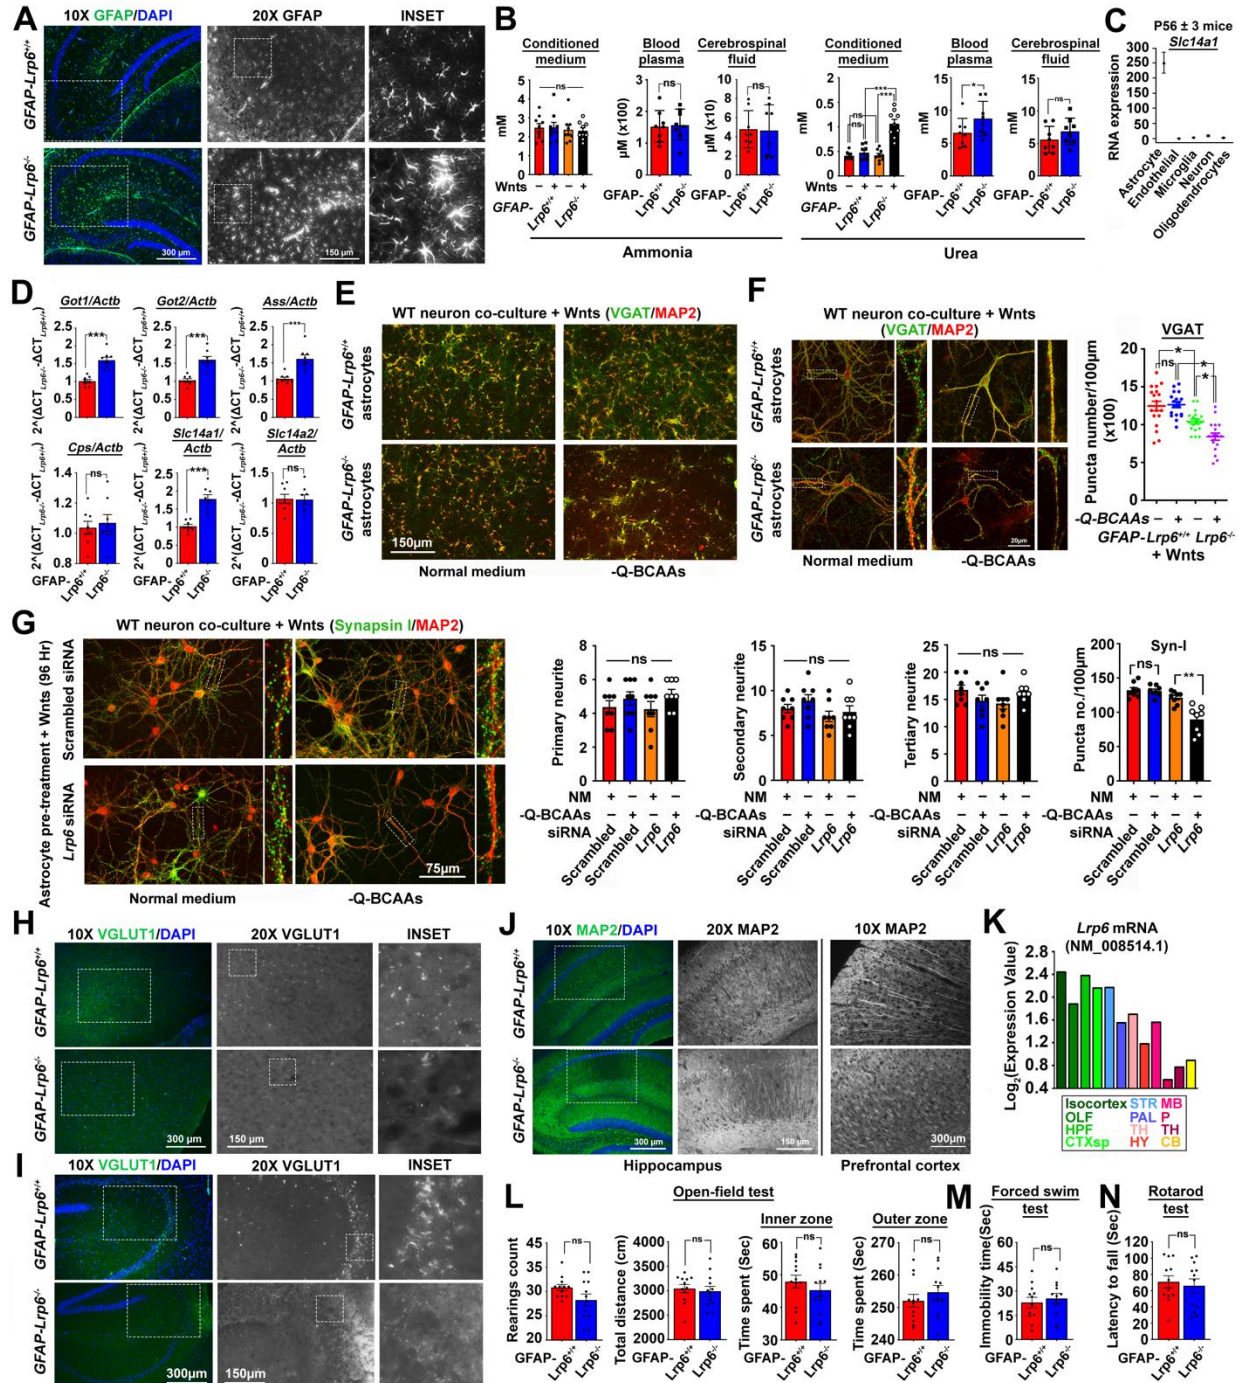

**Supplementary Figure 6. Loss of LRP6 triggers reactive phenotype, compromising neurite integrity and synaptic abundances of neighbouring neurons.**

(A) Representative immunohistochemistry images showing the effect of *Lrp6* knockout on astrocyte distribution and morphologies at hippocampal CA3 region. (B) Quantification of extracellular ammonia and urea in conditioned medium harvested *in vitro* after astrocyte culturing for 72 hours; blood plasma and cerebrospinal fluid *in vivo* (N=8, \*\*\*P<0.001, \*P<0.01, ns=non-significant; one-way ANOVA and two-tailed unpaired t-test). (C) Referencing the public single cell transcriptome data of the adult (Post-natal day 56 ± 3) mouse brains, gene

expression level of *Slc14a1* in various mature brain cells were compared. (D) Quantitative PCR was performed to characterize key genes involved in the urea cycle (N=8, \*\*\*P<0.0001, ns=non-significant, two-tailed unpaired t-test). (E-F) Representative (E) low or (F) high magnification images of VGAT-positive puncta of wildtype neurons co-cultured with either Wnts-exposed *GFAP-Lrp6<sup>+/+</sup>* and *GFAP-Lrp6<sup>-/-</sup>* astrocytes in normal culturing medium or in one without supplementation of glutamine and BCAAs (-Q-BCAAs). Quantifications of VGAT puncta density are shown (N=18, \*\*\*P<0.0001, \*P<0.01, ns=non-significant, One-way ANOVA). (G) Representative images of MAP2-positive dendrites and synapsin-I (SYN-I) puncta of wildtype neurons co-cultured with either Wnts-exposed astrocytes pre-expressed with scrambled or *Lrp6* siRNA for 72 hours in normal culturing medium or in one without supplementation of glutamine and BCAAs (-Q-BCAAs). Quantifications of primary, secondary and tertiary neurite number together with SYN-1 puncta density are shown (N=8, \*\*P<0.001, ns=non-significant, One-way ANOVA). (H-I) Representative immunohistochemistry images showing the effect of *Lrp6* knockout in astrocytes on VGLUT1 density at the (H) prefrontal cortex and the (I) hippocampal CA3 regions. (J) Representative immunohistochemistry images showing the effect of *Lrp6* knockout in astrocytes on neurite integrity at the prefrontal cortex and the hippocampal CA2 regions (N=6). (K) Referencing the Allen Mouse Brain Atlas, expression level of *Lrp6* transcript was quantified in various mouse brain regions. (Forebrain regions: Isocortex; OLF and CTXsp. Between Fore-and-midbrain: STR and PAL. Midbrain regions: TH; HY and MB. Brainstem area: P and MY. Hindbrain: CB). (L) Number of rearing; total distance travelled; time-spent in the inner and outer zones were quantified in an open-field test paradigm (N=12, ns=non-significant, two-tailed unpaired t-test). (M) Quantification of immobility time recorded in the forced swim test paradigm (N=12, ns=non-significant, two-tailed unpaired t-test). (N) Quantification of time latency to fall in the rotarod test paradigm (N=12, ns=non-significant, two-tailed unpaired t-test). Values represent the Mean  $\pm$  SEM.

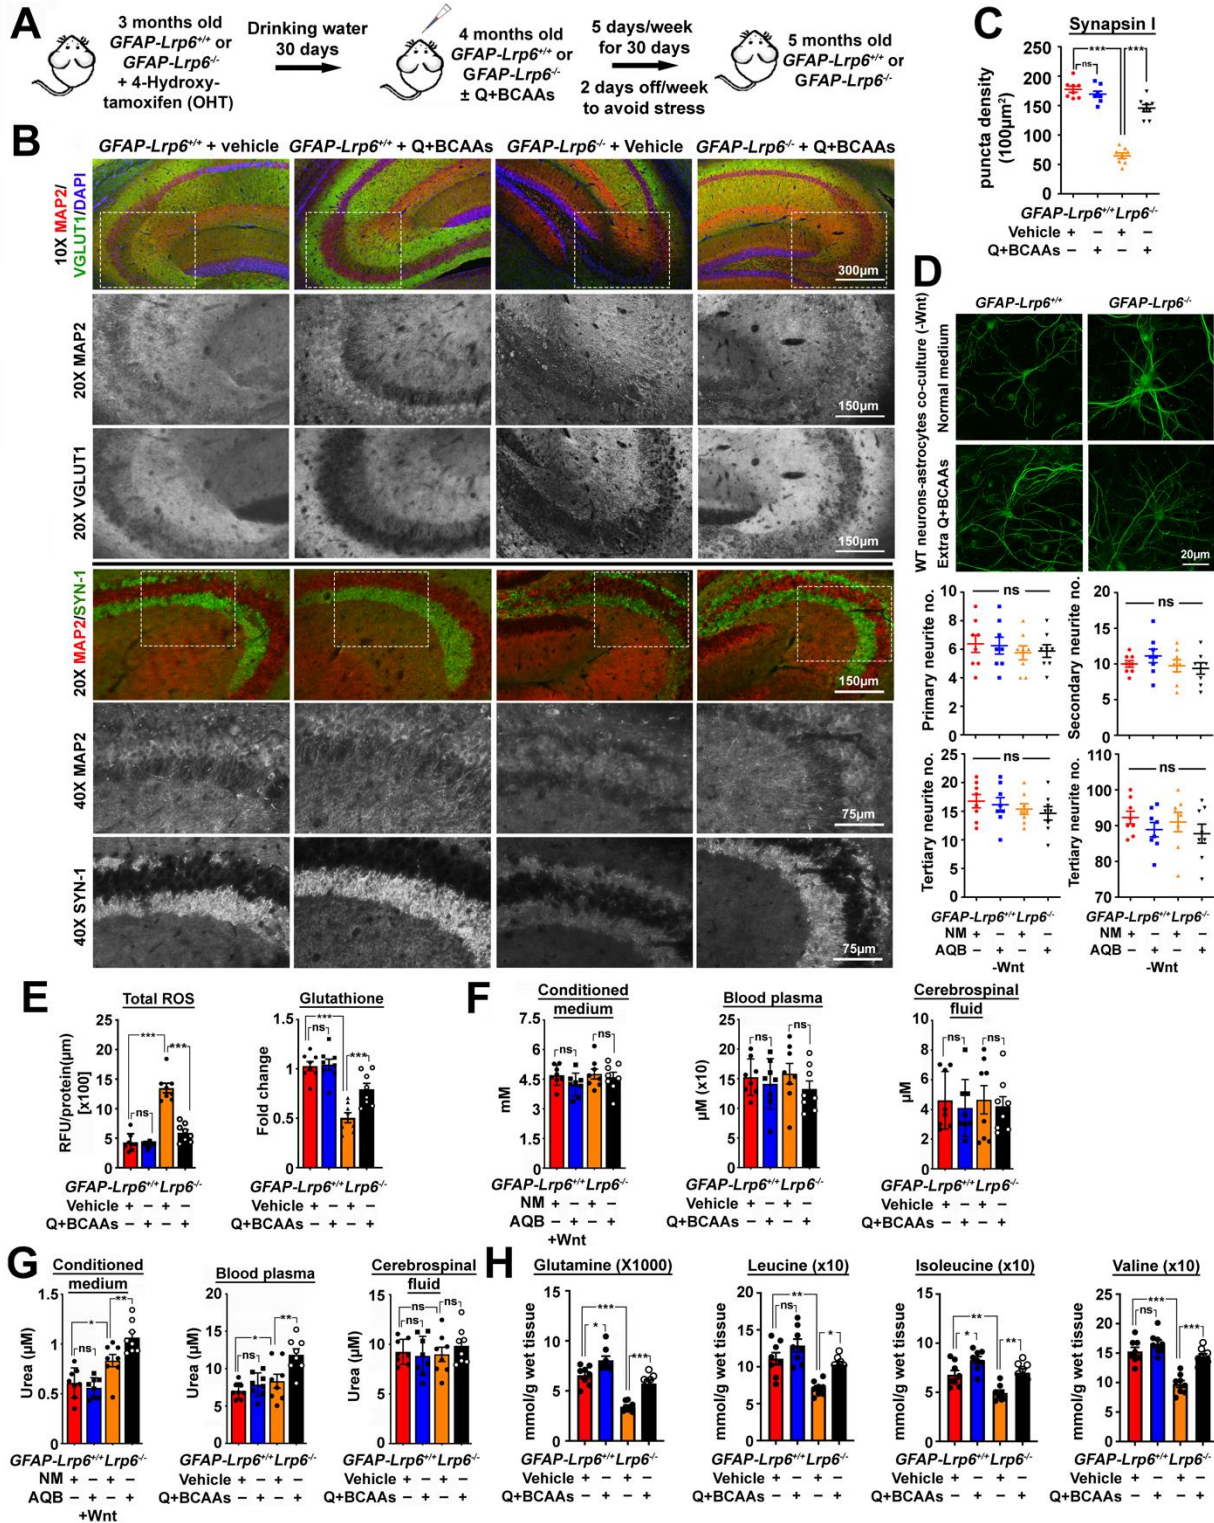

### Supplementary Figure 7. Glutamine and BCAAs supplementation preserved synaptic abundance and neurite integrity of neurons

(A) Schematic diagram of the treatment scheme involving the intranasal delivery of a small bolus (~15-20µl) of 560 nmol/0.4 g average brain wet weight of glutamine (Q) and a mixture of

BCAAs (each 10 nmol/0.4 g average brain wet weight) or equal volume of vehicle into both the *GFAP-Lrp6<sup>+/+</sup>* and *GFAP-Lrp6<sup>-/-</sup>* mice for 30 days. (B) Representative immunohistochemistry images showing the effect of Q+BCAAs supplementation on VGLUT1 and Synapsin-I (SYN-1) signals as well as neurite integrity in the mouse hippocampal CA3 regions (N=8). (C) Quantification of Synapsin-I puncta density in (B) (N=8, \*\*\*P<0.0001, ns=non-significant, one-way ANOVA). (D) Representative images of MAP2-positive neurites in wildtype mouse primary neurons co-cultured with mouse astrocytes without Wnt ligands exposure in the routine culture medium or in one with extra supplementation of glutamine (Q) (340μM) and BCAAs (Ile: 40 mM; Leu: 20mM and Val: 20mM). Quantification of primary; secondary, tertiary neurites and viability of neurons are shown (N=8, ns=non-significant, One-way ANOVA). (E) Quantification of ROS and glutathione levels in cortical brain tissues harvested from mice subjected to Q+BCAAs supplementation or vehicle controls (N=8; \*\*\*P<0.0001, ns=non-significant, one-way ANOVA). (F-G) Quantification of extracellular ammonia and urea in conditioned medium harvested *in vitro*; blood plasma and cerebrospinal fluid *in vivo* (N=8, \*\*\*P<0.0001, \*\*P<0.001, \*P<0.01, ns=non-significant; one-way ANOVA). (H) Quantification of glutamine and BCAA levels in brain tissues of *GFAP-Lrp6<sup>+/+</sup>* and *GFAP-Lrp6<sup>-/-</sup>* mice subjected to either vehicle or Q+BCAAs supplementation (N=8, \*\*\*P<0.0001, \*\*P<0.001, \*P<0.01, ns=non-significant, one-way ANOVA). Values represent the Mean ± SEM.

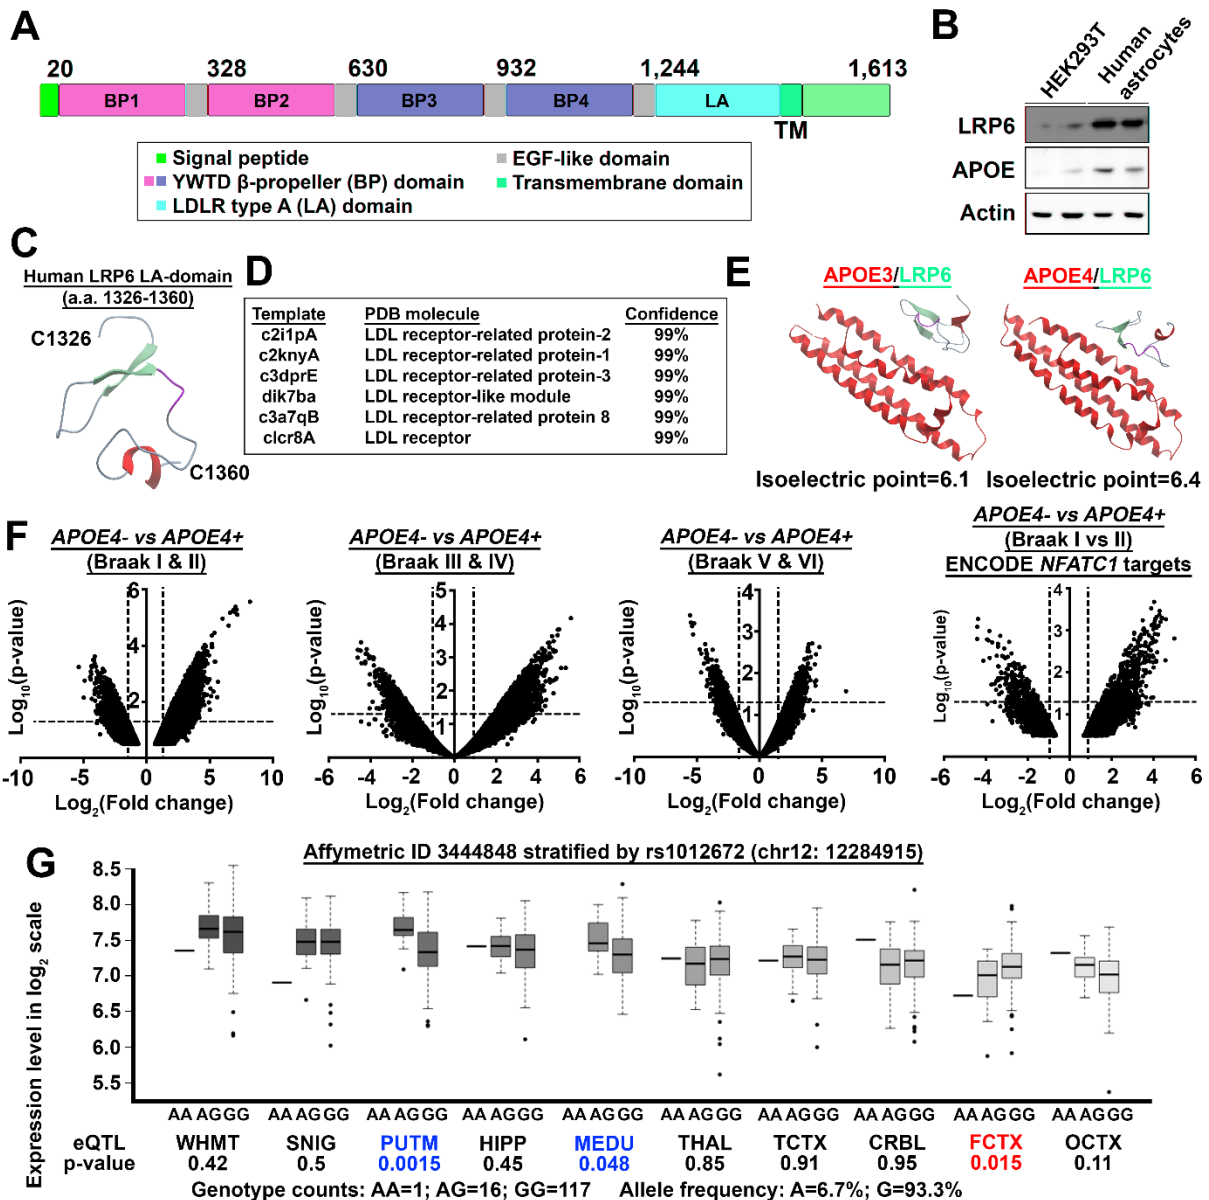

**Supplementary Figure 8. APOE4 mediates LRP6 loss effect in astrocytes and contributes to enhanced risk of LOAD.**

(A) A schematic diagram showing the domain organization of human LRP6 protein. 'BP' stands for YWTD β-propeller domain. The first and second YWTD domains are shown in pink and the third and fourth ones in blue. EGF-like domains, LDLR type A repeats and transmembrane region are shown in gray, cyan and green, respectively. (B) Representative immunoblots revealing endogenous expressions of LRP6 and APOE were almost absent in human HEK293T cells as compared to human astrocytes (N=6). (C) The predicted LRP6 LA domain structure by Phyre<sup>2</sup> adopts a (D) LDL-receptor like domain with 99% confidences. (E) *In silico* docking was performed between LRP6 with (E) APOE3 or (F) APOE4 proteins. Predicted forms of interaction as well as the protein isoelectric points are shown<sup>33</sup>. (F) Left 3 plots: Volcano plots showing comparisons of gene expression profiles between APOE4+ and APOE4- astrocytes laser-dissected out from post-mortem human brains of AD patients of various Braak Stages (N=3

samples per group). Far right: Volcano plot showing the comparison of all ENCODE *NFATC1* target gene expressions in APOE4+ and APOE4- astrocytes laser-dissected out from post-mortem human brains of AD patients within Braak Stages I and II (N=3 samples per group). Horizontal dotted line indicated P=0.05. (G) Association of SNP rs1012672 with *LRP6* gene expression level in 10 brain regions (Affymetrix ID 3444848). Data were extracted from the *BRAINEAC* database (<http://www.braineac.org>). Abbreviations: eQTL, expression quantitative trait locus; SING, substantia nigra; THAL, thalamus; MEDU, inferior olivary nucleus; PUTM, putamen; HIPPO, hippocampus; TCTX, temporal cortex; WHMT, intralobular white matter; FCTX, frontal cortex; OCTX, occipital cortex; CRBL, cerebellar cortex. Red indicates significant downregulation and blue as significant upregulation. On the forward strand: AA= homozygous G->A mutation; AG=heterozygous G->A mutation; GG=homozygous wildtype. Genotype counts and allele frequencies are labelled.



**Supplementary Table 1. Full list of metabolites identified from *GFAP-LRP6<sup>+/+</sup>* and *GFAP-LRP6<sup>-/-</sup>* astrocytes using the CE-TOFMS.**

| Compound name                                 | HMDB ID                                                                                 | GFAP-Lrp6 <sup>+/+</sup> |         | GFAP-Lrp6 <sup>-/-</sup> |         | GFAP-Lrp6 <sup>-/-</sup> /<br>GFAP-LRP6 <sup>+/+</sup> |                 |
|-----------------------------------------------|-----------------------------------------------------------------------------------------|--------------------------|---------|--------------------------|---------|--------------------------------------------------------|-----------------|
|                                               |                                                                                         | Mean                     | S.D.    | Mean                     | S.D.    | FC                                                     | <i>p</i> -value |
| 3-Hydroxy-3-methylglutaryl-CoA                | <a href="#">HMDB0001375</a>                                                             | 1.5E-02                  | 3.7E-03 | 4.4E-02                  | 8.8E-03 | 2.8                                                    | 0.000           |
| 3-Hydroxyisovaleryl-CoA                       | HMDB0006870                                                                             | 8.7E-05                  | 1.4E-05 | 1.2E-04                  | 1.9E-05 | 1.4                                                    | 0.007           |
| (S)-3-Hydroxyisobutyric acid                  | <a href="#">HMDB0000023</a>                                                             | 2.1E-02                  | 1.1E-03 | 4.2E-02                  | 5.4E-03 | 2.0                                                    | 0.000           |
| (S)-Methylmalonate semialdehyde               | HMDB0002217                                                                             | 7.0E-03                  | 6.1E-04 | 9.1E-03                  | 6.9E-04 | 1.3                                                    | 0.000           |
| 1-Methyl-4-imidazoleacetic acid               | <a href="#">HMDB0002820</a>                                                             | 5.4E-04                  | 1.3E-04 | 5.1E-04                  | 8.1E-05 | 0.9                                                    | 0.585           |
| 1-Methyladenosine                             | <a href="#">HMDB0003331</a>                                                             | 2.2E-04                  | 3.6E-05 | 2.0E-04                  | 2.4E-05 | 0.9                                                    | 0.352           |
| 1-Methylhistamine                             | <a href="#">HMDB0000898</a>                                                             | 2.7E-04                  | 5.9E-05 | 3.0E-04                  | 8.4E-06 | 1.1                                                    | 0.231           |
| 1-Methylhistidine<br>3-Methylhistidine        | <a href="#">HMDB0000001</a><br><a href="#">HMDB0000479</a>                              | 6.4E-04                  | 1.3E-04 | 5.0E-04                  | 1.2E-04 | 0.8                                                    | 0.081           |
| 1-Methylnicotinamide                          | <a href="#">HMDB0000699</a>                                                             | 1.6E-04                  | N.D.    | N.D.                     | N.D.    | N.D.                                                   | N.D.            |
| 2,3-Diphosphoglyceric acid                    | <a href="#">HMDB0001294</a>                                                             | 3.6E-05                  | 9.9E-06 | 1.2E-04                  | 8.0E-05 | 3.3                                                    | 0.047           |
| 2-Aminoisobutyric acid<br>2-Aminobutyric acid | <a href="#">HMDB0001906</a><br><a href="#">HMDB0000452</a>                              | 8.3E-04                  | N.D.    | N.D.                     | N.D.    | N.D.                                                   | N.D.            |
| 2'-Deoxycytidine                              | <a href="#">HMDB0000014</a>                                                             | 6.4E-05                  | N.D.    | N.D.                     | N.D.    | N.D.                                                   | N.D.            |
| 2-Hydroxyglutaric acid                        | <a href="#">HMDB0000606</a> , <a href="#">HMDB0000694</a>                               | 1.7E-03                  | 2.2E-04 | 1.9E-03                  | 1.5E-04 | 1.1                                                    | 0.186           |
| 2-Hydroxyvaleric acid                         | <a href="#">HMDB0001863</a>                                                             | N.D.                     | N.D.    | N.D.                     | N.D.    | N.D.                                                   | N.D.            |
| 2-Methyl-3-hydroxybutyryl-CoA                 | <a href="#">HMDB0001356</a>                                                             | 1.5E-02                  | 3.3E-03 | 3.4E-02                  | 8.6E-03 | 2.3                                                    | 0.001           |
| 2-Methylbutyryl-CoA                           | <a href="#">HMDB0001041</a>                                                             | 1.5E-02                  | 3.9E-03 | 3.5E-02                  | 5.1E-03 | 2.3                                                    | 0.000           |
| 3'-Dephospho CoA                              | <a href="#">HMDB0001373</a>                                                             | 2.1E-04                  | 2.9E-05 | 2.3E-04                  | 3.8E-05 | 1.1                                                    | 0.244           |
| 3-Hydroxy-3-methylglutaric acid               | HMDB0000355                                                                             | 5.1E-04                  | 1.1E-04 | 6.5E-04                  | 5.5E-05 | 1.3                                                    | 0.017           |
| 3-Hydroxybutyric acid                         | <a href="#">HMDB0000011</a> , <a href="#">HMDB0000357</a> , <a href="#">HMDB0000442</a> | 6.7E-04                  | 1.9E-04 | 8.5E-04                  | 1.6E-04 | 1.3                                                    | 0.104           |

|                                         |                                                            |         |         |         |         |      |       |
|-----------------------------------------|------------------------------------------------------------|---------|---------|---------|---------|------|-------|
| 3-Methyl-2-oxovaleric acid              | <a href="#">HMDB0000491</a>                                | 1.6E-02 | 4.4E-03 | 4.3E-02 | 1.4E-02 | 2.7  | 0.001 |
| 3-Methylbutanoyl-CoA                    | <a href="#">HMDB0001113</a>                                | 7.7E-05 | 5.0E-05 | 1.3E-04 | 1.8E-05 | 1.7  | 0.031 |
| 3-Methylbutanoyl-CoA                    | <a href="#">HMDB0001113</a>                                | 3.1E-03 | 1.5E-03 | 4.5E-03 | 1.1E-03 | 1.5  | 0.096 |
| 3-Methylcrotonyl-CoA                    | <a href="#">HMDB0001493</a>                                | 6.2E-04 | 2.4E-04 | 9.5E-04 | 2.2E-04 | 1.5  | 0.033 |
| 3-Methylglutaconyl-CoA                  | <a href="#">HMDB0000522</a>                                | 1.6E-04 | 2.4E-05 | 3.0E-04 | 2.1E-05 | 1.9  | 0.000 |
| 3-Phosphoglyceric acid                  | <a href="#">HMDB0000807</a>                                | 1.0E-04 | 3.9E-06 | 1.1E-04 | 1.5E-05 | 1.1  | 0.350 |
| 4-Guanidinobutyric acid                 | <a href="#">HMDB0003464</a>                                | 4.8E-04 | 6.2E-05 | 7.8E-04 | 2.2E-05 | 1.6  | 0.000 |
| 5-Aminoimidazole-4-carboxamide ribotide | <a href="#">HMDB0001517</a>                                | 4.2E-05 | 3.3E-06 | 4.1E-05 | 8.6E-06 | 1.0  | 0.965 |
| 5'-Deoxy-5'-methylthioadenosine         | <a href="#">HMDB0001173</a>                                | N.D.    | N.D.    | N.D.    | N.D.    | N.D. | N.D.  |
| 5-Hydroxyindoleacetic acid              | <a href="#">HMDB0000763</a>                                | 6.0E-05 | 2.2E-05 | 6.1E-05 | 1.1E-05 | 1.0  | 0.928 |
| 5-Oxoproline                            | <a href="#">HMDB0000267</a>                                | 1.3E-03 | 6.4E-04 | 1.3E-03 | 5.0E-04 | 1.0  | 0.910 |
| 6-Phosphogluconic acid                  | <a href="#">HMDB0001316</a>                                | 3.7E-04 | 9.6E-05 | 2.6E-04 | 4.0E-05 | 0.7  | 0.020 |
| Acetoacetate                            | <a href="#">HMDB0000060</a>                                | 8.5E-05 | 1.4E-05 | 1.2E-04 | 1.4E-05 | 1.5  | 0.002 |
| Acetoacetyl-CoA                         | <a href="#">HMDB0001484</a>                                | 1.5E-04 | 2.6E-05 | 4.3E-04 | 2.9E-04 | 2.9  | 0.037 |
| Acetyl CoA_divalent                     | <a href="#">HMDB0001206</a>                                | 2.3E-04 | 2.2E-05 | 2.4E-04 | 4.4E-05 | 1.1  | 0.560 |
| Acetylcholine                           | <a href="#">HMDB0000895</a>                                | 2.3E-03 | 2.9E-04 | 1.1E-03 | 2.2E-04 | 0.5  | 0.000 |
| Adenine                                 | <a href="#">HMDB0000034</a>                                | 7.2E-04 | 9.5E-05 | 7.9E-04 | 8.8E-05 | 1.1  | 0.198 |
| Adenosine                               | <a href="#">HMDB0000050</a>                                | 4.1E-02 | 7.5E-03 | 4.2E-02 | 3.5E-03 | 1.0  | 0.817 |
| Adenylosuccinic acid                    | <a href="#">HMDB0000536</a>                                | 1.6E-03 | 1.5E-04 | 1.6E-03 | 4.7E-04 | 1.0  | 0.839 |
| ADP                                     | <a href="#">HMDB0001341</a>                                | 1.3E-02 | 1.3E-03 | 1.1E-02 | 1.2E-03 | 0.8  | 0.018 |
| ADP-glucose<br>GDP-fucose               | <a href="#">HMDB0006557</a><br><a href="#">HMDB0001095</a> | 4.2E-04 | 2.3E-05 | 4.2E-04 | 4.1E-05 | 1.0  | 0.843 |
| ADP-ribose                              | <a href="#">HMDB0001178</a>                                | 2.0E-03 | 2.7E-04 | 3.1E-03 | 5.8E-04 | 1.6  | 0.001 |
| Ala                                     | <a href="#">HMDB0000161</a> , <a href="#">HMDB0001310</a>  | 6.9E-02 | 4.2E-03 | 3.6E-02 | 8.0E-03 | 0.5  | 0.000 |
| allo-Threonine                          | <a href="#">HMDB0004041</a>                                | N.D.    | N.D.    | N.D.    | N.D.    | N.D. | N.D.  |

|                           |                                                           |         |         |         |         |      |       |
|---------------------------|-----------------------------------------------------------|---------|---------|---------|---------|------|-------|
| alpha-Ketoisovaleric acid | <a href="#">HMDB0000019</a>                               | 1.2E-02 | 2.6E-03 | 1.9E-02 | 2.9E-03 | 1.6  | 0.001 |
| AMP                       | <a href="#">HMDB0000045</a>                               | 3.7E-02 | 4.4E-03 | 3.1E-02 | 3.1E-03 | 0.8  | 0.022 |
| Anserine_divalent         |                                                           | 2.4E-04 | 4.4E-05 | 3.3E-04 | 8.3E-05 | 1.4  | 0.036 |
| Arg                       | <a href="#">HMDB0000517</a> , <a href="#">HMDB0003416</a> | 1.3E-02 | 1.4E-03 | 1.4E-02 | 1.0E-03 | 1.0  | 0.592 |
| Argininosuccinic acid     | <a href="#">HMDB0000052</a>                               | 3.7E-04 | 3.6E-05 | 4.0E-04 | 1.8E-04 | 1.1  | 0.653 |
| Ascorbate 2-glucoside     |                                                           | N.D.    | N.D.    | N.D.    | N.D.    | N.D. | N.D.  |
| Ascorbic acid             | <a href="#">HMDB0000044</a>                               | 3.9E-02 | 5.9E-03 | 3.2E-02 | 9.0E-03 | 0.8  | 0.158 |
| Asn                       | <a href="#">HMDB0000168</a> , <a href="#">HMDB0033780</a> | 5.4E-03 | 3.8E-04 | 4.8E-03 | 1.2E-03 | 0.9  | 0.340 |
| Asp                       | <a href="#">HMDB0000191</a> , <a href="#">HMDB0006483</a> | 1.0E-02 | 7.2E-04 | 1.9E-02 | 7.9E-03 | 1.9  | 0.018 |
| ATP                       | <a href="#">HMDB0000538</a>                               | 7.9E-03 | 1.5E-03 | 6.9E-03 | 1.6E-03 | 0.9  | 0.276 |
| Betaine                   | <a href="#">HMDB0000043</a>                               | 2.9E-03 | 5.0E-04 | 4.3E-03 | 2.7E-03 | 1.5  | 0.227 |
| Butyrylcarnitine          | <a href="#">HMDB0002013</a>                               | N.D.    | N.D.    | N.D.    | N.D.    | N.D. | N.D.  |
| cAMP                      | <a href="#">HMDB0000058</a>                               | 1.2E-04 | 2.4E-05 | 2.2E-04 | 3.3E-04 | 1.8  | 0.499 |
| Carboxymethyllysine       |                                                           | 4.9E-04 | 2.8E-04 | 2.3E-04 | 3.5E-05 | 0.5  | 0.046 |
| Carnitine                 | <a href="#">HMDB0000062</a>                               | 1.7E-02 | 1.5E-03 | 2.4E-02 | 1.3E-03 | 1.4  | 0.000 |
| Carnosine                 | <a href="#">HMDB0000033</a>                               | 2.9E-03 | 5.9E-04 | 3.5E-03 | 1.0E-03 | 1.2  | 0.307 |
| cCMP<br>2',3'-cCMP        | <a href="#">HMDB0011691</a>                               | N.D.    | N.D.    | 1.8E-05 | 6.1E-06 | N.D. | N.D.  |
| CDP                       | <a href="#">HMDB0001546</a>                               | 1.3E-04 | 1.9E-05 | 1.1E-04 | 1.8E-05 | 0.8  | 0.112 |
| CDP-choline               | <a href="#">HMDB0001413</a>                               | 7.0E-04 | 5.6E-05 | 6.0E-04 | 2.6E-05 | 0.9  | 0.003 |
| Choline                   | <a href="#">HMDB0000097</a>                               | 3.8E-02 | 5.5E-03 | 4.4E-02 | 5.0E-03 | 1.2  | 0.085 |
| cis-Aconitic acid         | <a href="#">HMDB0000072</a>                               | 4.2E-04 | 4.6E-05 | 3.8E-04 | 1.5E-05 | 0.9  | 0.115 |
| Citraconic acid           | <a href="#">HMDB0000634</a>                               | 7.0E-05 | 1.5E-05 | 7.5E-05 | 1.8E-05 | 1.1  | 0.771 |
| Citric acid               | <a href="#">HMDB0000094</a>                               | 9.0E-03 | 4.0E-03 | 7.8E-03 | 2.0E-03 | 0.9  | 0.526 |
| Citrulline                | <a href="#">HMDB0000904</a>                               | 1.4E-03 | 7.2E-05 | 2.6E-03 | 3.0E-04 | 1.8  | 0.000 |
| CMP                       | <a href="#">HMDB0000095</a>                               | 7.1E-04 | 1.1E-04 | 5.0E-04 | 5.0E-05 | 0.7  | 0.002 |
| CMP-N-                    | <a href="#">HMDB0001176</a>                               | 7.7E-04 | 4.0E    | 7.6E-04 | 5.6E    | 1.0  | 0.82  |

|                                             |                                                            |         |         |         |         |      |       |
|---------------------------------------------|------------------------------------------------------------|---------|---------|---------|---------|------|-------|
| acetylneuraminate                           |                                                            |         | -05     |         | -05     |      | 2     |
| CoA_divalent                                |                                                            | 1.1E-03 | 8.4E-05 | 1.3E-03 | 9.8E-05 | 1.3  | 0.000 |
| Creatine                                    | <a href="#">HMDB0000064</a>                                | 3.4E-02 | 1.3E-03 | 3.9E-02 | 3.0E-03 | 1.1  | 0.011 |
| Creatinine                                  | <a href="#">HMDB0000562</a>                                | 1.3E-03 | 5.9E-05 | 1.3E-03 | 8.2E-05 | 1.0  | 0.267 |
| CTP                                         | <a href="#">HMDB0000082</a>                                | 5.4E-05 | 1.3E-05 | 5.0E-05 | 1.5E-05 | 0.9  | 0.594 |
| Cys                                         | <a href="#">HMDB0000574</a> , <a href="#">HMDB0003417</a>  | 1.8E-04 | 3.4E-05 | 6.0E-04 | 1.9E-04 | 3.2  | 0.000 |
| Cystathionine                               | <a href="#">HMDB0000099</a>                                | 1.5E-03 | 5.5E-04 | 3.9E-03 | 1.3E-03 | 2.5  | 0.002 |
| Cysteine glutathione disulfide              | <a href="#">HMDB0000656</a>                                | 4.7E-04 | 9.9E-05 | 5.5E-04 | 1.2E-04 | 1.2  | 0.265 |
| Cytidine                                    | <a href="#">HMDB0000089</a>                                | 2.0E-03 | 2.1E-04 | 1.8E-03 | 3.1E-04 | 0.9  | 0.360 |
| Diethylaminomalonic acid                    |                                                            | 1.2E-03 | 5.1E-04 | 7.7E-04 | 2.9E-04 | 0.6  | 0.097 |
| Dihydroxyacetone phosphate                  | <a href="#">HMDB0001473</a>                                | 2.3E-03 | 7.4E-04 | 8.7E-04 | 1.7E-04 | 0.4  | 0.001 |
| Disulfiram                                  |                                                            | N.D.    | N.D.    | N.D.    | N.D.    | N.D. | N.D.  |
| dTDP                                        | <a href="#">HMDB0001274</a>                                | N.D.    | N.D.    | N.D.    | N.D.    | N.D. | N.D.  |
| dTDP-glucose                                | <a href="#">HMDB0001328</a>                                | N.D.    | N.D.    | N.D.    | N.D.    | N.D. | N.D.  |
| dTMP                                        | <a href="#">HMDB0001227</a>                                | N.D.    | N.D.    | N.D.    | N.D.    | N.D. | N.D.  |
| Ethanolamine                                | <a href="#">HMDB0000149</a>                                | 6.8E-03 | 1.0E-03 | 4.7E-03 | 5.8E-04 | 0.7  | 0.001 |
| Ethanolamine phosphate                      | <a href="#">HMDB0000224</a>                                | 1.7E-02 | 1.8E-03 | 9.0E-03 | 1.0E-03 | 0.5  | 0.000 |
| FAD_divalent                                |                                                            | 1.0E-04 | 9.1E-06 | 1.1E-04 | 7.7E-06 | 1.1  | 0.111 |
| Fructose 1,6-diphosphate                    | <a href="#">HMDB0001058</a>                                | 1.5E-03 | 8.4E-04 | 3.4E-04 | 4.9E-05 | 0.2  | 0.007 |
| Fructose 6-phosphate                        | <a href="#">HMDB0000124</a>                                | 4.7E-04 | 1.8E-04 | 1.4E-04 | 1.6E-05 | 0.3  | 0.001 |
| Fumaric acid                                | <a href="#">HMDB0000134</a>                                | 2.2E-03 | 2.0E-04 | 2.1E-03 | 1.5E-04 | 1.0  | 0.401 |
| GABA                                        | <a href="#">HMDB0000112</a>                                | 9.0E-03 | 1.0E-03 | 6.3E-03 | 2.3E-03 | 0.7  | 0.024 |
| GDP                                         | <a href="#">HMDB0001201</a>                                | 5.0E-03 | 4.4E-04 | 3.8E-03 | 9.4E-05 | 0.8  | 0.000 |
| GDP-glucose<br>GDP-mannose<br>GDP-galactose | <a href="#">HMDB0003351</a><br><a href="#">HMDB0001163</a> | 8.2E-04 | 8.5E-05 | 7.3E-04 | 6.8E-05 | 0.9  | 0.061 |
| Gln                                         | <a href="#">HMDB0000641</a> , <a href="#">HMDB0003423</a>  | 2.4E-02 | 4.3E-03 | 1.3E-02 | 7.0E-03 | 0.6  | 0.009 |

|                             |                                                           |         |         |         |         |     |       |
|-----------------------------|-----------------------------------------------------------|---------|---------|---------|---------|-----|-------|
| Glu                         | <a href="#">HMDB0000148</a> , <a href="#">HMDB0003339</a> | 3.1E-02 | 1.3E-03 | 1.9E-02 | 4.8E-03 | 0.6 | 0.000 |
| Gluconic acid               | <a href="#">HMDB0000625</a>                               | 1.7E-04 | 1.5E-05 | 1.6E-04 | 1.7E-05 | 0.9 | 0.242 |
| Glucose 1-phosphate         | <a href="#">HMDB0001586</a>                               | 5.8E-04 | 1.4E-04 | 2.3E-04 | 3.1E-05 | 0.4 | 0.000 |
| Glucose 6-phosphate         | <a href="#">HMDB0001401</a>                               | 1.6E-03 | 6.2E-04 | 4.1E-04 | 4.7E-05 | 0.3 | 0.001 |
| Glu-Glu                     |                                                           | 6.2E-05 | 1.7E-05 | 5.5E-05 | 5.0E-06 | 0.9 | 0.612 |
| Glutathione (GSH)           | <a href="#">HMDB0000125</a>                               | 9.0E-02 | 6.7E-03 | 6.3E-02 | 2.6E-02 | 0.7 | 0.031 |
| Glutathione (GSSG)_divalent |                                                           | 1.8E-02 | 1.8E-03 | 9.9E-03 | 5.7E-03 | 0.6 | 0.010 |
| Gly                         | <a href="#">HMDB0000123</a>                               | 1.4E-03 | 5.4E-04 | 2.4E-03 | 4.7E-04 | 1.7 | 0.006 |
| Glyceraldehyde 3-phosphate  | <a href="#">HMDB0001112</a>                               | 5.2E-05 | 1.4E-05 | N.D.    | N.D.    | N.D | N.D.  |
| Glycerol                    | <a href="#">HMDB0000131</a>                               | 1.0E-02 | 2.7E-03 | 1.3E-02 | 3.2E-03 | 1.2 | 0.200 |
| Glycerol 3-phosphate        | <a href="#">HMDB0000126</a>                               | 8.2E-03 | 1.4E-03 | 1.6E-02 | 3.1E-03 | 1.9 | 0.000 |
| Glycerophosphocholine       | <a href="#">HMDB0000086</a>                               | 6.4E-02 | 1.1E-02 | 7.5E-02 | 5.2E-03 | 1.2 | 0.053 |
| Gly-Gly                     | <a href="#">HMDB0011733</a>                               | 2.8E-04 | 3.9E-05 | 2.5E-04 | 1.2E-05 | 0.9 | 0.368 |
| GMP                         | <a href="#">HMDB0001397</a>                               | 7.6E-03 | 6.0E-04 | 5.9E-03 | 4.2E-04 | 0.8 | 0.000 |
| GTP                         | <a href="#">HMDB0001273</a>                               | 2.2E-03 | 2.5E-04 | 1.8E-03 | 3.1E-04 | 0.8 | 0.020 |
| Guanosine                   | <a href="#">HMDB0000133</a>                               | 4.0E-03 | 5.2E-04 | 4.6E-03 | 5.1E-04 | 1.1 | 0.104 |
| Hexanoic acid               | <a href="#">HMDB0000535</a>                               | 4.8E-05 | 3.1E-06 | 5.1E-05 | 3.9E-06 | 1.0 | 0.328 |
| His                         | <a href="#">HMDB0000177</a>                               | 1.0E-02 | 2.5E-03 | 7.3E-03 | 1.9E-03 | 0.7 | 0.051 |
| Histamine                   | <a href="#">HMDB0000870</a>                               | 4.9E-05 | 1.0E-06 | 3.9E-05 | N.D.    | 0.8 | N.D.  |
| Homocarnosine               | <a href="#">HMDB0000745</a>                               | 6.2E-03 | 7.8E-04 | 1.1E-02 | 7.7E-04 | 1.8 | 0.000 |
| Homoserine                  | <a href="#">HMDB0000719</a>                               | 6.1E-04 | 4.5E-05 | 5.5E-04 | 5.2E-05 | 0.9 | 0.054 |
| Homovanillic acid           | <a href="#">HMDB0000118</a>                               | 2.0E-04 | 7.0E-05 | 2.2E-04 | N.D.    | 1.1 | N.D.  |
| Hydroxyproline              | <a href="#">HMDB0000725</a>                               | 7.6E-04 | 5.3E-05 | 7.6E-04 | 3.5E-05 | 1.0 | 0.990 |
| Hypotaurine                 | <a href="#">HMDB0000965</a>                               | 9.6E-04 | 3.1E-04 | 5.8E-04 | 2.6E-04 | 0.6 | 0.054 |
| Hypoxanthine                | <a href="#">HMDB0000157</a>                               | 5.8E-03 | 1.1E-03 | 6.3E-03 | 1.1E-03 | 1.1 | 0.462 |
| Ile                         | <a href="#">HMDB0000172</a>                               | 1.7E-02 | 5.4E    | 5.8E-03 | 2.4E    | 0.3 | 0.00  |

|                                                                                        |                                                            |         |         |         |         |      |       |
|----------------------------------------------------------------------------------------|------------------------------------------------------------|---------|---------|---------|---------|------|-------|
|                                                                                        |                                                            |         | -03     |         | -03     |      | 1     |
| IMP                                                                                    | <a href="#">HMDB0000175</a>                                | 6.7E-03 | 9.2E-04 | 6.5E-03 | 1.9E-03 | 1.0  | 0.774 |
| Inosine                                                                                | <a href="#">HMDB0000195</a>                                | 2.4E-02 | 4.3E-03 | 2.3E-02 | 3.3E-03 | 1.0  | 0.786 |
| Isethionic acid                                                                        | <a href="#">HMDB0003903</a>                                | 9.2E-04 | 1.4E-04 | 1.0E-03 | 7.0E-05 | 1.1  | 0.153 |
| Isobutyryl-CoA                                                                         | <a href="#">HMDB0001243</a>                                | 2.0E-05 | 3.9E-06 | 4.2E-05 | 1.2E-05 | 2.1  | 0.002 |
| Isovaleric acid<br>Valeric acid                                                        | <a href="#">HMDB0000718</a><br><a href="#">HMDB0000892</a> | 6.1E-05 | N.D.    | N.D.    | N.D.    | N.D. | N.D.  |
| Ketoleucine                                                                            | <a href="#">HMDB0000695</a>                                | 2.7E-02 | 9.5E-03 | 4.1E-02 | 2.3E-02 | 1.5  | 0.192 |
| L-3-Aminoisobutanoate                                                                  | <a href="#">HMDB0003911</a>                                | 2.0E-03 | 5.5E-04 | 3.2E-03 | 8.7E-04 | 1.6  | 0.017 |
| Lactic acid                                                                            | <a href="#">HMDB0000190</a> , <a href="#">HMDB0001311</a>  | 1.8E-01 | 9.8E-03 | 1.9E-01 | 4.0E-02 | 1.0  | 0.870 |
| Leu                                                                                    | <a href="#">HMDB0000687</a>                                | 1.6E-02 | 3.6E-03 | 9.2E-03 | 6.0E-03 | 0.6  | 0.030 |
| Lys                                                                                    | <a href="#">HMDB0000182</a> , <a href="#">HMDB0003405</a>  | 3.5E-02 | 9.5E-03 | 1.8E-02 | 1.5E-03 | 0.5  | 0.002 |
| Malic acid                                                                             | <a href="#">HMDB0000156</a> , <a href="#">HMDB0000744</a>  | 1.9E-02 | 1.4E-03 | 1.6E-02 | 9.4E-04 | 0.9  | 0.003 |
| Met                                                                                    | <a href="#">HMDB0000696</a>                                | 5.0E-03 | 8.7E-04 | 3.9E-03 | 1.3E-03 | 0.8  | 0.126 |
| Methylmalonyl-CoA                                                                      | <a href="#">HMDB0001269</a>                                | 6.3E-02 | 2.6E-02 | 7.0E-02 | 7.4E-02 | 1.1  | 0.834 |
| Mucic acid                                                                             | <a href="#">HMDB0000639</a>                                | 4.2E-05 | 7.9E-06 | 4.7E-05 | 3.7E-06 | 1.1  | 0.362 |
| <i>myo</i> -Inositol 1-phosphate<br><i>myo</i> -Inositol 3-phosphate                   | <a href="#">HMDB0000213</a><br><a href="#">HMDB0006814</a> | 1.8E-03 | 2.1E-04 | 1.4E-03 | 1.5E-04 | 0.8  | 0.005 |
| <i>myo</i> -Inositol 2-phosphate                                                       | <a href="#">HMDB0002985</a>                                | 8.0E-04 | 9.0E-05 | 5.0E-04 | 4.5E-05 | 0.6  | 0.000 |
| <i>N</i> <sup>2</sup> -Acetylaminoadipic acid                                          | <a href="#">HMDB0062715</a>                                | 8.0E-05 | 2.2E-05 | 1.8E-04 | 4.5E-05 | 2.2  | 0.001 |
| <i>N</i> <sup>2</sup> -Succinylornithine                                               | <a href="#">HMDB0001199</a>                                | 2.4E-04 | 4.7E-05 | 6.2E-04 | 1.3E-04 | 2.6  | 0.000 |
| <i>N</i> <sup>5</sup> -Ethylglutamine                                                  |                                                            | 6.7E-04 | 2.0E-04 | 5.0E-04 | 1.3E-04 | 0.7  | 0.109 |
| <i>N</i> <sup>6</sup> , <i>N</i> <sup>6</sup> , <i>N</i> <sup>6</sup> -Trimethyllysine | <a href="#">HMDB0001325</a>                                | 7.2E-04 | 7.8E-05 | 3.4E-04 | 2.7E-05 | 0.5  | 0.000 |
| <i>N</i> <sup>6</sup> -Methyllysine                                                    | <a href="#">HMDB0002038</a>                                | 4.5E-04 | 5.5E-05 | 3.9E-04 | 6.4E-05 | 0.9  | 0.134 |
| <i>N</i> <sup>8</sup> -Acetylspermidine                                                | <a href="#">HMDB0002189</a>                                | 4.9E-05 | N.D.    | 5.8E-05 | 5.2E-06 | 1.2  | N.D.  |
| <i>N</i> -Acetylaspartic acid                                                          | <a href="#">HMDB0000812</a>                                | 1.5E-01 | 8.9E-03 | 1.3E-01 | 1.4E-02 | 0.8  | 0.003 |

|                                                                     |                                                                                           |         |         |         |         |      |       |
|---------------------------------------------------------------------|-------------------------------------------------------------------------------------------|---------|---------|---------|---------|------|-------|
| N-Acetylgalactosamine<br>N-Acetylmannosamine<br>N-Acetylglucosamine | <a href="#">HMDB0000853</a><br><a href="#">HMDB0001129</a><br><a href="#">HMDB0000215</a> | 4.2E-04 | N.D.    | 2.5E-04 | N.D.    | 0.6  | N.D.  |
| N-Acetylglucosamine 1-phosphate                                     | <a href="#">HMDB0001367</a>                                                               | 2.7E-04 | 3.9E-05 | 1.8E-04 | 2.0E-05 | 0.6  | 0.000 |
| N-Acetylglucosamine 6-phosphate                                     | <a href="#">HMDB0001062</a>                                                               | 1.3E-04 | 2.3E-05 | 9.3E-05 | 1.7E-05 | 0.7  | 0.007 |
| N-Acetylglutamic acid                                               | <a href="#">HMDB0001138</a>                                                               | 1.2E-03 | 8.6E-05 | 1.1E-03 | 5.9E-05 | 0.9  | 0.013 |
| N-Acetylglutamine                                                   | <a href="#">HMDB0006029</a>                                                               | 2.5E-04 | 1.0E-04 | 2.1E-04 | 7.9E-05 | 0.8  | 0.474 |
| N-Acetyllysine                                                      | <a href="#">HMDB0000446</a>                                                               | 2.1E-04 | 2.3E-05 | 2.0E-04 | 1.5E-05 | 1.0  | 0.760 |
| N-Acetylmethionine                                                  | <a href="#">HMDB0011745</a>                                                               | 4.8E-05 | 5.9E-06 | 3.9E-05 | 5.7E-06 | 0.8  | 0.019 |
| N-Acetylneuraminic acid                                             | <a href="#">HMDB0000230</a>                                                               | 2.6E-03 | 1.6E-04 | 1.9E-03 | 1.3E-04 | 0.7  | 0.000 |
| N-Acetylphenylalanine                                               | <a href="#">HMDB0000512</a>                                                               | 2.5E-05 | 2.2E-06 | 1.7E-05 | 4.1E-06 | 0.7  | 0.126 |
| N-Acetyl- $\beta$ -alanine                                          | HMDB0061880                                                                               | 7.3E-05 | 4.9E-06 | 7.0E-05 | 7.8E-06 | 1.0  | 0.375 |
| NAD <sup>+</sup>                                                    | <a href="#">HMDB0000902</a>                                                               | 7.4E-03 | 1.3E-03 | 5.0E-03 | 1.3E-03 | 0.7  | 0.008 |
| NADH                                                                | <a href="#">HMDB0001487</a>                                                               | 2.1E-04 | 6.6E-05 | 1.4E-04 | 4.1E-05 | 0.6  | 0.043 |
| NADP <sup>+</sup>                                                   | <a href="#">HMDB0000217</a>                                                               | 4.6E-04 | 7.0E-05 | 4.1E-04 | 6.1E-05 | 0.9  | 0.213 |
| NADPH_divalent                                                      |                                                                                           | 3.4E-05 | 1.1E-05 | N.D.    | N.D.    | N.D. | N.D.  |
| N-Glycolylneuraminic acid                                           | <a href="#">HMDB0000833</a>                                                               | 3.9E-05 | 1.0E-05 | 4.5E-05 | 5.8E-06 | 1.1  | 0.295 |
| Nicotinamide                                                        | <a href="#">HMDB0001406</a>                                                               | 2.3E-02 | 1.1E-02 | 1.2E-02 | 3.7E-03 | 0.5  | 0.037 |
| Nicotinic acid                                                      | <a href="#">HMDB0001488</a>                                                               | 9.4E-05 | N.D.    | N.D.    | N.D.    | N.D. | N.D.  |
| NMN                                                                 | <a href="#">HMDB0000229</a>                                                               | 1.2E-04 | 2.3E-05 | 1.3E-04 | 2.1E-05 | 1.0  | 0.874 |
| Noradrenaline 6-Hydroxydopamine                                     | <a href="#">HMDB0000216</a><br><a href="#">HMDB0001537</a>                                | 1.6E-04 | 3.9E-05 | 1.6E-04 | 3.6E-05 | 1.0  | 0.859 |
| O-Acetylcarnitine                                                   | <a href="#">HMDB0000201</a>                                                               | 1.5E-02 | 1.4E-03 | 2.4E-02 | 1.8E-03 | 1.6  | 0.000 |

|                                          |                                                                                         |         |         |         |         |      |       |
|------------------------------------------|-----------------------------------------------------------------------------------------|---------|---------|---------|---------|------|-------|
| O-Acetylhomoserine<br>2-Aminoadipic acid | <a href="#">HMDB0000510</a>                                                             | 3.1E-03 | 1.3E-03 | 3.9E-03 | 7.5E-04 | 1.3  | 0.219 |
| Octopamine<br>Dopamine                   | <a href="#">HMDB0004825</a><br><a href="#">HMDB0000073</a>                              | 2.3E-04 | 6.9E-05 | N.D.    | N.D.    | N.D. | N.D.  |
| Ornithine                                | <a href="#">HMDB0000214</a> , <a href="#">HMDB0003374</a>                               | 4.2E-04 | 7.8E-05 | 3.3E-04 | 4.7E-05 | 0.8  | 0.038 |
| O-Succinylhomoserine                     |                                                                                         | 3.6E-05 | 9.3E-06 | 2.8E-05 | 6.4E-06 | 0.8  | 0.146 |
| Oxoglutaric acid                         | <a href="#">HMDB0000208</a>                                                             | 5.3E-02 | 1.4E-02 | 6.2E-02 | 7.9E-03 | 1.2  | 0.029 |
| Pantothenic acid                         | <a href="#">HMDB0000210</a>                                                             | 1.1E-03 | 1.6E-04 | 1.4E-03 | 1.9E-04 | 1.3  | 0.019 |
| Pelargonic acid                          | <a href="#">HMDB0000847</a>                                                             | 1.0E-04 | 2.5E-05 | 9.7E-05 | 6.1E-06 | 1.0  | 0.703 |
| Phe                                      | <a href="#">HMDB0000159</a>                                                             | 1.3E-02 | 4.0E-03 | 1.0E-02 | 3.3E-03 | 0.8  | 0.277 |
| Phosphocreatine                          | <a href="#">HMDB0001511</a>                                                             | 1.1E-04 | 1.6E-05 | 1.6E-04 | 2.9E-05 | 1.5  | 0.002 |
| Phosphoenolpyruvic acid                  | <a href="#">HMDB0000263</a>                                                             | N.D.    | N.D.    | 4.7E-05 | 5.9E-06 | N.D. | N.D.  |
| Phosphorylcholine                        | <a href="#">HMDB0001565</a>                                                             | 4.6E-02 | 3.9E-03 | 3.5E-02 | 2.9E-03 | 0.8  | 0.000 |
| Phytic acid_divalent                     |                                                                                         | 2.6E-04 | 2.3E-05 | 2.4E-04 | 2.1E-05 | 0.9  | 0.093 |
| Pipecolic acid                           | <a href="#">HMDB0000070</a> , <a href="#">HMDB0000716</a> , <a href="#">HMDB0005960</a> | 4.0E-04 | 8.7E-05 | 4.9E-04 | 9.6E-05 | 1.2  | 0.117 |
| Pro                                      | <a href="#">HMDB0000162</a> , <a href="#">HMDB0003411</a>                               | 1.3E-02 | 9.7E-04 | 9.8E-03 | 8.7E-04 | 0.7  | 0.000 |
| Propionyl-CoA                            | <a href="#">HMDB0001275</a>                                                             | 7.4E-05 | 8.1E-06 | 1.0E-04 | 7.0E-06 | 1.4  | 0.000 |
| Prostaglandin E <sub>2</sub>             | <a href="#">HMDB0001220</a>                                                             | 6.8E-05 | 1.7E-05 | 2.0E-05 | 4.1E-06 | 0.3  | 0.001 |
| Prostaglandin F <sub>2α</sub>            | <a href="#">HMDB0001139</a>                                                             | 3.1E-05 | 8.3E-06 | N.D.    | N.D.    | N.D. | N.D.  |
| PRPP                                     | <a href="#">HMDB0000280</a>                                                             | 3.2E-04 | 7.8E-05 | 2.6E-04 | 5.2E-05 | 0.8  | 0.138 |
| Putrescine                               | <a href="#">HMDB0001414</a>                                                             | 1.4E-04 | 2.1E-05 | 1.4E-04 | 2.6E-05 | 1.0  | 0.885 |
| Pyridoxamine 5'-phosphate                | <a href="#">HMDB0001555</a>                                                             | 2.6E-04 | 2.2E-05 | 3.0E-04 | 2.6E-05 | 1.2  | 0.008 |
| Pyrophosphate                            | <a href="#">HMDB0000250</a>                                                             | 1.6E-03 | 1.3E-04 | 1.5E-03 | 1.2E-04 | 1.0  | 0.468 |
| Quinic acid                              | <a href="#">HMDB0003072</a>                                                             | N.D.    | N.D.    | 8.0E-05 | 4.2E-05 | N.D. | N.D.  |
| Rhein                                    |                                                                                         | 8.7E-05 | 8.3E-06 | 7.8E-05 | 9.5E-06 | 0.9  | 0.089 |
| Ribose 5-phosphate                       | <a href="#">HMDB0001548</a>                                                             | 2.5E-04 | 5.0E-05 | 1.5E-04 | 4.6E-05 | 0.6  | 0.007 |
| Ribulose 1,5-diphosphate                 |                                                                                         | 1.6E-04 | 7.9E-05 | 6.0E-05 | 5.0E-05 | 0.4  | 0.026 |



|                                             |                             |         |         |         |         |      |       |
|---------------------------------------------|-----------------------------|---------|---------|---------|---------|------|-------|
| Ribulose 5-phosphate                        | <a href="#">HMDB0000618</a> | 2.8E-03 | 3.0E-04 | 2.8E-03 | 3.4E-04 | 1.0  | 0.719 |
| Saccharopine                                | <a href="#">HMDB0000279</a> | 6.1E-04 | 1.9E-04 | 1.5E-03 | 2.1E-04 | 2.5  | 0.000 |
| S-Adenosylhomocysteine                      | <a href="#">HMDB0000939</a> | 1.1E-04 | 5.3E-06 | 1.1E-04 | 2.1E-05 | 1.0  | 0.882 |
| S-Adenosylmethionine                        | <a href="#">HMDB0001185</a> | 1.0E-03 | 8.9E-05 | 1.1E-03 | 1.2E-04 | 1.1  | 0.272 |
| Sedoheptulose 7-phosphate                   | <a href="#">HMDB0001068</a> | 2.2E-04 | 3.7E-05 | 1.8E-04 | 1.5E-05 | 0.8  | 0.034 |
| Serotonin                                   | <a href="#">HMDB0000259</a> | 2.8E-04 | 5.5E-05 | 2.4E-04 | 8.3E-05 | 0.9  | 0.341 |
| S-Lactoylglutathione                        | <a href="#">HMDB0001066</a> | 2.7E-04 | 8.2E-05 | 7.7E-05 | 1.6E-05 | 0.3  | 0.000 |
| S-Methylmalonyl-CoA                         | <a href="#">HMDB0001269</a> | 2.4E-04 | 3.5E-05 | 2.9E-04 | 2.8E-05 | 1.2  | 0.022 |
| Sorbitol 6-phosphate                        | <a href="#">HMDB0005831</a> | 5.1E-05 | 4.2E-06 | 3.5E-05 | 4.1E-06 | 0.7  | 0.000 |
| Spermidine                                  | <a href="#">HMDB0001257</a> | 3.7E-04 | 2.5E-05 | 4.4E-04 | 2.8E-05 | 1.2  | 0.002 |
| Spermine                                    | <a href="#">HMDB0001256</a> | 2.8E-04 | 6.3E-05 | 2.1E-04 | 2.3E-05 | 0.8  | 0.035 |
| Stachydrine                                 | <a href="#">HMDB0004827</a> | 1.7E-04 | 2.5E-06 | 1.9E-04 | 3.9E-05 | 1.1  | 0.527 |
| Succinic acid                               | <a href="#">HMDB0000254</a> | 1.2E-02 | 1.1E-03 | 1.2E-02 | 5.6E-04 | 1.0  | 0.597 |
| Succinyl-CoA                                | <a href="#">HMDB0001022</a> | 2.4E-04 | 2.3E-04 | 5.2E-04 | 1.7E-04 | 2.2  | 0.034 |
| Taurine                                     | <a href="#">HMDB0000251</a> | 1.3E-01 | 1.7E-02 | 9.0E-02 | 9.6E-03 | 0.7  | 0.000 |
| Taurocholic acid                            | <a href="#">HMDB0000036</a> | 2.2E-05 | 2.1E-06 | 3.6E-05 | N.D.    | 1.6  | N.D.  |
| Terephthalic acid                           | <a href="#">HMDB0002428</a> | 2.1E-04 | 1.7E-05 | 1.9E-04 | 2.4E-05 | 0.9  | 0.213 |
| Thiamine                                    | <a href="#">HMDB0000235</a> | 8.7E-05 | 1.3E-05 | 6.7E-05 | 1.2E-05 | 0.8  | 0.023 |
| Thiamine diphosphate                        | <a href="#">HMDB0001372</a> | 1.7E-04 | 2.0E-05 | 1.7E-04 | 1.6E-05 | 1.0  | 0.632 |
| Thiamine phosphate                          | <a href="#">HMDB0002666</a> | 6.8E-05 | 1.2E-05 | 8.8E-05 | 5.5E-06 | 1.3  | 0.003 |
| Thiaproline                                 |                             | 3.9E-04 | 8.0E-05 | 8.2E-04 | 1.7E-04 | 2.1  | 0.001 |
| Thr                                         | <a href="#">HMDB0000167</a> | 2.3E-02 | 1.8E-03 | 1.9E-02 | 3.1E-03 | 0.8  | 0.041 |
| Threonic acid                               | <a href="#">HMDB0000943</a> | 1.1E-03 | 1.5E-04 | 9.1E-04 | 7.8E-05 | 0.8  | 0.013 |
| <i>threo</i> - $\beta$ -Methylaspartic acid |                             | N.D.    | N.D.    | 3.5E-04 | 5.1E-05 | N.D. | N.D.  |
| <i>trans</i> -Glutaconic acid               | <a href="#">HMDB0000620</a> | 5.9E-04 | 6.6E-05 | 6.1E-04 | 4.4E-05 | 1.0  | 0.748 |

|                                                          |                                                            |         |         |         |         |      |       |
|----------------------------------------------------------|------------------------------------------------------------|---------|---------|---------|---------|------|-------|
| Trehalose 6-phosphate                                    | <a href="#">HMDB0001124</a>                                | 2.5E-05 | 4.4E-06 | 2.7E-05 | 2.7E-06 | 1.1  | 0.497 |
| Trigonelline                                             | <a href="#">HMDB0000875</a>                                | 2.4E-04 | 7.1E-05 | 4.2E-04 | 8.4E-05 | 1.8  | 0.002 |
| Trimethylamine                                           | <a href="#">HMDB0000906</a>                                | 2.5E-04 | N.D.    | N.D.    | N.D.    | N.D. | N.D.  |
| Trimethylamine N-oxide                                   | <a href="#">HMDB0000925</a>                                | 3.8E-04 | 8.1E-05 | 4.1E-04 | 7.0E-05 | 1.1  | 0.592 |
| Trp                                                      | <a href="#">HMDB0000929</a>                                | 3.1E-03 | 1.7E-03 | 2.3E-03 | 1.3E-03 | 0.8  | 0.418 |
| Tyr                                                      | <a href="#">HMDB0000158</a>                                | 8.3E-03 | 3.5E-03 | 6.2E-03 | 2.8E-03 | 0.7  | 0.281 |
| UDP                                                      | <a href="#">HMDB0000295</a>                                | 5.3E-04 | 6.7E-05 | 5.1E-04 | 1.1E-04 | 1.0  | 0.771 |
| UDP-glucose<br>UDP-galactose                             | <a href="#">HMDB0000286</a><br><a href="#">HMDB0000302</a> | 5.1E-03 | 1.1E-03 | 1.0E-02 | 5.2E-03 | 2.0  | 0.039 |
| UDP-glucuronic acid                                      | <a href="#">HMDB0000935</a>                                | 4.0E-04 | 2.1E-05 | 1.0E-03 | 5.2E-04 | 2.5  | 0.016 |
| UDP-N-acetylgalactosamine-1<br>UDP-N-acetylglucosamine-1 | <a href="#">HMDB0000304</a><br><a href="#">HMDB0000290</a> | 4.8E-05 | 1.0E-05 | 1.1E-04 | 5.3E-05 | 2.2  | 0.027 |
| UDP-N-acetylgalactosamine-2<br>UDP-N-acetylglucosamine-2 | <a href="#">HMDB0000304</a><br><a href="#">HMDB0000290</a> | 4.7E-03 | 3.6E-04 | 1.1E-02 | 5.4E-03 | 2.3  | 0.020 |
| UMP                                                      | <a href="#">HMDB0000288</a>                                | 2.5E-03 | 3.6E-04 | 1.9E-03 | 2.1E-04 | 0.8  | 0.006 |
| Uracil                                                   | <a href="#">HMDB0000300</a>                                | 5.0E-04 | N.D.    | 3.4E-04 | N.D.    | 0.7  | N.D.  |
| Urea                                                     | <a href="#">HMDB0000294</a>                                | 1.9E-01 | 3.9E-02 | 2.8E-01 | 2.7E-02 | 1.5  | 0.03  |
| Uric acid                                                | <a href="#">HMDB0000289</a>                                | 6.7E-05 | 1.1E-05 | 6.9E-05 | 9.6E-06 | 1.0  | 0.766 |
| Uridine                                                  | <a href="#">HMDB0000296</a>                                | 3.9E-03 | 4.0E-04 | 5.2E-03 | 4.2E-04 | 1.3  | 0.000 |
| UTP                                                      | <a href="#">HMDB0000285</a>                                | 2.8E-04 | 5.4E-05 | 2.8E-04 | 8.3E-05 | 1.0  | 0.869 |
| Val                                                      | <a href="#">HMDB0000883</a>                                | 1.6E-02 | 6.4E-03 | 7.6E-03 | 2.3E-03 | 0.5  | 0.009 |
| Xanthine                                                 | <a href="#">HMDB0000292</a>                                | 8.6E-04 | 1.1E-04 | 6.3E-04 | 1.4E-04 | 0.7  | 0.039 |
| XC0016                                                   |                                                            | 7.3E-03 | 1.8E-03 | 3.2E-03 | 6.7E-04 | 0.4  | 0.000 |
| XC0071                                                   |                                                            | N.D.    | N.D.    | N.D.    | N.D.    | N.D. | N.D.  |
| XC0132                                                   |                                                            | 1.7E-04 | 1.2E-05 | 1.6E-04 | 7.7E-06 | 1.0  | 0.451 |

|                                   |                             |         |         |         |         |      |       |
|-----------------------------------|-----------------------------|---------|---------|---------|---------|------|-------|
| $\beta$ -Ala                      | <a href="#">HMDB0000056</a> | 4.7E-03 | 7.9E-04 | 4.6E-03 | 7.7E-04 | 1.0  | 0.836 |
| $\beta$ -Ala-Lys                  |                             | N.D.    | N.D.    | N.D.    | N.D.    | N.D. | N.D.  |
| $\gamma$ -Butyrobetaine           | <a href="#">HMDB0001161</a> | 2.6E-03 | 4.5E-04 | 1.4E-03 | 1.9E-04 | 0.5  | 0.000 |
| $\gamma$ -Glu-2-aminobutyric acid |                             | 3.0E-04 | 5.6E-05 | 2.6E-04 | 5.6E-05 | 0.8  | 0.193 |
| $\gamma$ -Glu-Cys                 | <a href="#">HMDB0001049</a> | 2.0E-04 | 3.8E-05 | 2.0E-04 | 1.8E-05 | 1.0  | 0.821 |

**Supplementary Table 2. Full list and details of MSEA enriched pathways.**

|                                | total | expected | hits | Raw p    | Holm p   | FDR      |
|--------------------------------|-------|----------|------|----------|----------|----------|
| Valine, Leucine and Isoleucine | 60    | 6.45     | 24   | 7.53E-10 | 7.38E-08 | 7.38E-08 |

|                                          |    |       |    |          |          |          |
|------------------------------------------|----|-------|----|----------|----------|----------|
| Degradation                              |    |       |    |          |          |          |
| Glutamate Metabolism                     | 49 | 5.26  | 17 | 3.57E-06 | 0.000346 | 0.000175 |
| Gluconeogenesis                          | 35 | 3.76  | 13 | 2.46E-05 | 0.00236  | 0.000804 |
| Warburg Effect                           | 58 | 6.23  | 17 | 4.69E-05 | 0.00445  | 0.00115  |
| Urea Cycle                               | 29 | 3.12  | 11 | 8.82E-05 | 0.00829  | 0.00173  |
| Malate-Aspartate Shuttle                 | 10 | 1.07  | 6  | 0.000198 | 0.0184   | 0.0029   |
| Carnitine Synthesis                      | 22 | 2.36  | 9  | 0.000207 | 0.0191   | 0.0029   |
| Nucleotide Sugars Metabolism             | 20 | 2.15  | 8  | 0.000578 | 0.0526   | 0.00701  |
| Glycolysis                               | 25 | 2.69  | 9  | 0.000643 | 0.0579   | 0.00701  |
| Arginine and Proline Metabolism          | 53 | 5.69  | 14 | 0.000783 | 0.0697   | 0.00767  |
| Ketone Body Metabolism                   | 13 | 1.4   | 6  | 0.00123  | 0.108    | 0.011    |
| Pentose Phosphate Pathway                | 29 | 3.12  | 9  | 0.00217  | 0.189    | 0.0161   |
| Butyrate Metabolism                      | 19 | 2.04  | 7  | 0.00231  | 0.198    | 0.0161   |
| Glycine and Serine Metabolism            | 59 | 6.34  | 14 | 0.00246  | 0.209    | 0.0161   |
| Aspartate Metabolism                     | 35 | 3.76  | 10 | 0.00246  | 0.209    | 0.0161   |
| Propanoate Metabolism                    | 42 | 4.51  | 11 | 0.00321  | 0.267    | 0.0197   |
| Cardiolipin Biosynthesis                 | 11 | 1.18  | 5  | 0.00356  | 0.292    | 0.0205   |
| Ammonia Recycling                        | 32 | 3.44  | 9  | 0.0046   | 0.372    | 0.025    |
| Alanine Metabolism                       | 17 | 1.83  | 6  | 0.00617  | 0.494    | 0.0318   |
| Glucose-Alanine Cycle                    | 13 | 1.4   | 5  | 0.00831  | 0.656    | 0.0399   |
| Phospholipid Biosynthesis                | 29 | 3.12  | 8  | 0.00856  | 0.667    | 0.0399   |
| Thiamine Metabolism                      | 9  | 0.967 | 4  | 0.0104   | 0.799    | 0.0434   |
| De Novo Triacylglycerol Biosynthesis     | 9  | 0.967 | 4  | 0.0104   | 0.799    | 0.0434   |
| Lysine Degradation                       | 30 | 3.22  | 8  | 0.0106   | 0.799    | 0.0434   |
| Phosphatidylcholine Biosynthesis         | 14 | 1.5   | 5  | 0.0118   | 0.876    | 0.0464   |
| Threonine and 2-Oxobutanoate Degradation | 20 | 2.15  | 6  | 0.0148   | 1        | 0.0556   |
| Cysteine Metabolism                      | 26 | 2.79  | 7  | 0.0159   | 1        | 0.0557   |
| Citric Acid Cycle                        | 32 | 3.44  | 8  | 0.0159   | 1        | 0.0557   |
| Glutathione Metabolism                   | 21 | 2.26  | 6  | 0.0189   | 1        | 0.0626   |
| Amino Sugar Metabolism                   | 33 | 3.54  | 8  | 0.0192   | 1        | 0.0626   |
| Purine Metabolism                        | 74 | 7.95  | 14 | 0.0205   | 1        | 0.0648   |
| Glycerol Phosphate Shuttle               | 11 | 1.18  | 4  | 0.0229   | 1        | 0.0702   |
| Pyruvate Metabolism                      | 48 | 5.16  | 10 | 0.0261   | 1        | 0.0775   |
| Phosphatidylethanolamine Biosynthesis    | 12 | 1.29  | 4  | 0.0316   | 1        | 0.091    |
| Nicotinate and Nicotinamide Metabolism   | 37 | 3.97  | 8  | 0.0369   | 1        | 0.103    |
| Starch and Sucrose Metabolism            | 31 | 3.33  | 7  | 0.0403   | 1        | 0.11     |
| Mitochondrial Electron Transport Chain   | 19 | 2.04  | 5  | 0.0444   | 1        | 0.118    |
| Fructose and Mannose Degradation         | 32 | 3.44  | 7  | 0.0472   | 1        | 0.122    |

|                                                                    |    |       |   |        |   |       |
|--------------------------------------------------------------------|----|-------|---|--------|---|-------|
| Phytanic Acid Peroxisomal Oxidation                                | 26 | 2.79  | 6 | 0.0513 | 1 | 0.129 |
| Lactose Synthesis                                                  | 20 | 2.15  | 5 | 0.0542 | 1 | 0.133 |
| Pantothenate and CoA Biosynthesis                                  | 21 | 2.26  | 5 | 0.0653 | 1 | 0.156 |
| Galactose Metabolism                                               | 38 | 4.08  | 7 | 0.103  | 1 | 0.241 |
| Glycerolipid Metabolism                                            | 25 | 2.69  | 5 | 0.121  | 1 | 0.276 |
| Oxidation of Branched Chain Fatty Acids                            | 26 | 2.79  | 5 | 0.138  | 1 | 0.293 |
| Inositol Phosphate Metabolism                                      | 26 | 2.79  | 5 | 0.138  | 1 | 0.293 |
| Plasmalogen Synthesis                                              | 26 | 2.79  | 5 | 0.138  | 1 | 0.293 |
| Beta-Alanine Metabolism                                            | 34 | 3.65  | 6 | 0.149  | 1 | 0.31  |
| Mitochondrial Beta-Oxidation of Short Chain Saturated Fatty Acids  | 27 | 2.9   | 5 | 0.155  | 1 | 0.317 |
| Methionine Metabolism                                              | 43 | 4.62  | 7 | 0.169  | 1 | 0.339 |
| Transfer of Acetyl Groups into Mitochondria                        | 22 | 2.36  | 4 | 0.204  | 1 | 0.4   |
| Biotin Metabolism                                                  | 8  | 0.859 | 2 | 0.209  | 1 | 0.401 |
| Phenylacetate Metabolism                                           | 9  | 0.967 | 2 | 0.251  | 1 | 0.463 |
| Homocysteine Degradation                                           | 9  | 0.967 | 2 | 0.251  | 1 | 0.463 |
| Beta Oxidation of Very Long Chain Fatty Acids                      | 17 | 1.83  | 3 | 0.273  | 1 | 0.492 |
| Inositol Metabolism                                                | 33 | 3.54  | 5 | 0.276  | 1 | 0.492 |
| Pyruvaldehyde Degradation                                          | 10 | 1.07  | 2 | 0.293  | 1 | 0.512 |
| Spermidine and Spermine Biosynthesis                               | 18 | 1.93  | 3 | 0.304  | 1 | 0.522 |
| Ethanol Degradation                                                | 19 | 2.04  | 3 | 0.335  | 1 | 0.565 |
| Phenylalanine and Tyrosine Metabolism                              | 28 | 3.01  | 4 | 0.354  | 1 | 0.569 |
| Selenoamino Acid Metabolism                                        | 28 | 3.01  | 4 | 0.354  | 1 | 0.569 |
| Mitochondrial Beta-Oxidation of Long Chain Saturated Fatty Acids   | 28 | 3.01  | 4 | 0.354  | 1 | 0.569 |
| Taurine and Hypotaurine Metabolism                                 | 12 | 1.29  | 2 | 0.375  | 1 | 0.591 |
| Folate Metabolism                                                  | 29 | 3.12  | 4 | 0.38   | 1 | 0.591 |
| Porphyrin Metabolism                                               | 40 | 4.3   | 5 | 0.433  | 1 | 0.663 |
| Androstenedione Metabolism                                         | 24 | 2.58  | 3 | 0.486  | 1 | 0.719 |
| Estrone Metabolism                                                 | 24 | 2.58  | 3 | 0.486  | 1 | 0.719 |
| Histidine Metabolism                                               | 43 | 4.62  | 5 | 0.499  | 1 | 0.719 |
| Fatty acid Metabolism                                              | 43 | 4.62  | 5 | 0.499  | 1 | 0.719 |
| Phosphatidylinositol Phosphate Metabolism                          | 17 | 1.83  | 2 | 0.561  | 1 | 0.796 |
| Mitochondrial Beta-Oxidation of Medium Chain Saturated Fatty Acids | 27 | 2.9   | 3 | 0.569  | 1 | 0.796 |
| Pterine Biosynthesis                                               | 29 | 3.12  | 3 | 0.619  | 1 | 0.85  |
| Pyrimidine Metabolism                                              | 59 | 6.34  | 6 | 0.624  | 1 | 0.85  |

|                                       |    |       |   |       |   |       |
|---------------------------------------|----|-------|---|-------|---|-------|
| Sphingolipid Metabolism               | 40 | 4.3   | 4 | 0.64  | 1 | 0.85  |
| Lactose Degradation                   | 9  | 0.967 | 1 | 0.642 | 1 | 0.85  |
| Riboflavin Metabolism                 | 20 | 2.15  | 2 | 0.652 | 1 | 0.852 |
| Betaine Metabolism                    | 21 | 2.26  | 2 | 0.679 | 1 | 0.875 |
| Androgen and Estrogen Metabolism      | 33 | 3.54  | 3 | 0.708 | 1 | 0.882 |
| D-Arginine and D-Ornithine Metabolism | 11 | 1.18  | 1 | 0.715 | 1 | 0.882 |
| Trehalose Degradation                 | 11 | 1.18  | 1 | 0.715 | 1 | 0.882 |
| Bile Acid Biosynthesis                | 65 | 6.98  | 6 | 0.72  | 1 | 0.882 |
| Caffeine Metabolism                   | 24 | 2.58  | 2 | 0.749 | 1 | 0.907 |
| Tryptophan Metabolism                 | 60 | 6.45  | 5 | 0.794 | 1 | 0.949 |
| Tyrosine Metabolism                   | 72 | 7.73  | 6 | 0.809 | 1 | 0.955 |
| Vitamin B6 Metabolism                 | 20 | 2.15  | 1 | 0.899 | 1 | 1     |
| Fatty Acid Elongation In Mitochondria | 35 | 3.76  | 2 | 0.906 | 1 | 1     |
| Steroid Biosynthesis                  | 48 | 5.16  | 3 | 0.907 | 1 | 1     |
| Sulfate/Sulfite Metabolism            | 22 | 2.36  | 1 | 0.92  | 1 | 1     |
| Retinol Metabolism                    | 37 | 3.97  | 2 | 0.922 | 1 | 1     |
| Steroidogenesis                       | 43 | 4.62  | 2 | 0.957 | 1 | 1     |
| Fatty Acid Biosynthesis               | 35 | 3.76  | 1 | 0.983 | 1 | 1     |
| Arachidonic Acid Metabolism           | 69 | 7.41  | 3 | 0.986 | 1 | 1     |

**Supplementary Table 3. Complete list of metabolic pathways identified from MetaboAnalyst.**

|                                                   | Total | Expected | Hits | Raw p    | Holm adjust | FDR      | Impact |
|---------------------------------------------------|-------|----------|------|----------|-------------|----------|--------|
| <b>Glycolysis or Gluconeogenesis</b>              | 61    | 5.875    | 26   | 5.84E-12 | 4.90E-10    | 4.90E-10 | 1.3833 |
| <b>Arginine biosynthesis</b>                      | 27    | 2.6004   | 15   | 2.25E-09 | 1.87E-07    | 8.33E-08 | 1.1538 |
| <b>Valine, leucine and isoleucine degradation</b> | 88    | 8.4754   | 28   | 2.98E-09 | 2.44E-07    | 8.33E-08 | 1.3103 |

|                                                    |    |         |    |            |            |            |         |
|----------------------------------------------------|----|---------|----|------------|------------|------------|---------|
| <b>Alanine, aspartate and glutamate metabolism</b> | 61 | 5.875   | 20 | 3.65E-07   | 2.95E-05   | 7.66E-06   | 1.1333  |
| <b>Inositol phosphate metabolism</b>               | 69 | 6.6455  | 21 | 7.57E-07   | 6.05E-05   | 1.27E-05   | 0.69118 |
| <b>Phosphatidylinositol signaling system</b>       | 74 | 7.127   | 20 | 1.08E-05   | 0.00085557 | 0.00015162 | 0.71233 |
| <b>D-Glutamine and D-glutamate metabolism</b>      | 10 | 0.96311 | 6  | 0.00011306 | 0.0088184  | 0.0013567  | 1.5556  |
| <b>Galactose metabolism</b>                        | 51 | 4.9119  | 14 | 0.00020066 | 0.015451   | 0.0020407  | 1.06    |
| <b>Butanoate metabolism</b>                        | 29 | 2.793   | 10 | 0.00021865 | 0.016617   | 0.0020407  | 1.0357  |
| <b>Taurine and hypotaurine metabolism</b>          | 16 | 1.541   | 7  | 0.00037661 | 0.028246   | 0.0031635  | 0.73333 |
| <b>Valine, leucine and isoleucine biosynthesis</b> | 12 | 1.1557  | 6  | 0.00042096 | 0.031151   | 0.0032146  | 1.2727  |
| <b>Lysine degradation</b>                          | 49 | 4.7193  | 13 | 0.00049066 | 0.035818   | 0.0034346  | 0.72917 |
| <b>Linoleic acid metabolism</b>                    | 17 | 1.6373  | 7  | 0.00058829 | 0.042357   | 0.0038012  | 1       |
| <b>Sphingolipid metabolism</b>                     | 58 | 5.5861  | 14 | 0.00084852 | 0.060245   | 0.0050911  | 0.33333 |
| <b>Pentose phosphate pathway</b>                   | 47 | 4.5266  | 12 | 0.0011739  | 0.082174   | 0.0065739  | 1.1304  |
| <b>Nitrogen metabolism</b>                         | 10 | 0.96311 | 5  | 0.0013358  | 0.09217    | 0.0066304  | 1       |
| <b>Arachidonic acid metabolism</b>                 | 81 | 7.8012  | 17 | 0.0013419  | 0.09217    | 0.0066304  | 0.6125  |
| <b>Glutathione metabolism</b>                      | 56 | 5.3934  | 13 | 0.0019082  | 0.12785    | 0.008905   | 0.78182 |
| <b>Amino sugar and nucleotide sugar metabolism</b> | 79 | 7.6086  | 16 | 0.0027389  | 0.18077    | 0.012109   | 0.78205 |
| <b>Cysteine and methionine metabolism</b>          | 71 | 6.8381  | 14 | 0.0064153  | 0.41699    | 0.026944   | 0.61429 |
| <b>beta-Alanine metabolism</b>                     | 44 | 4.2377  | 10 | 0.0073889  | 0.47289    | 0.029555   | 0.4186  |
| <b>Fructose and mannose metabolism</b>             | 40 | 3.8525  | 9  | 0.011632   | 0.73281    | 0.044413   | 0.71795 |
| <b>Propanoate metabolism</b>                       | 48 | 4.623   | 10 | 0.013814   | 0.85645    | 0.05045    | 0.89362 |
| <b>Glyoxylate and dicarboxylate metabolism</b>     | 56 | 5.3934  | 11 | 0.015507   | 0.94596    | 0.053762   | 0.36364 |
| <b>Citrate cycle (TCA cycle)</b>                   | 42 | 4.0451  | 9  | 0.016001   | 0.96003    | 0.053762   | 1.1707  |
| <b>Aminoacyl-tRNA biosynthesis</b>                 | 74 | 7.127   | 13 | 0.021926   | 1          | 0.070838   | 0.19178 |
| <b>Arginine and proline metabolism</b>             | 78 | 7.5123  | 13 | 0.0326     | 1          | 0.1015     | 0.4935  |

|                                                            |     |         |    |          |   |         |          |
|------------------------------------------------------------|-----|---------|----|----------|---|---------|----------|
|                                                            |     |         |    | 5        |   | 8       | 1        |
| <b>Pantothenate and CoA biosynthesis</b>                   | 34  | 3.2746  | 7  | 0.039377 | 1 | 0.11813 | 0.48485  |
| <b>Pyruvate metabolism</b>                                 | 45  | 4.334   | 8  | 0.061704 | 1 | 0.17808 | 0.68182  |
| <b>Synthesis and degradation of ketone bodies</b>          | 10  | 0.96311 | 3  | 0.063601 | 1 | 0.17808 | 1.3333   |
| <b>Glycine, serine and threonine metabolism</b>            | 68  | 6.5492  | 10 | 0.11279  | 1 | 0.28955 | 0.56716  |
| <b>Starch and sucrose metabolism</b>                       | 43  | 4.1414  | 7  | 0.11332  | 1 | 0.28955 | 0.47619  |
| <b>Glycerolipid metabolism</b>                             | 35  | 3.3709  | 6  | 0.11375  | 1 | 0.28955 | 0.47059  |
| <b>Ascorbate and aldarate metabolism</b>                   | 13  | 1.252   | 3  | 0.12253  | 1 | 0.30272 | 0.58333  |
| <b>Phenylalanine metabolism</b>                            | 21  | 2.0225  | 4  | 0.1367   | 1 | 0.32808 | 0.4      |
| <b>Thiamine metabolism</b>                                 | 14  | 1.3484  | 3  | 0.14539  | 1 | 0.33925 | 0.53846  |
| <b>Retinol metabolism</b>                                  | 47  | 4.5266  | 7  | 0.16044  | 1 | 0.36425 | 0.21739  |
| <b>Histidine metabolism</b>                                | 32  | 3.082   | 5  | 0.18913  | 1 | 0.40737 | 0.22581  |
| <b>Pentose and glucuronate interconversions</b>            | 32  | 3.082   | 5  | 0.18913  | 1 | 0.40737 | 0.58065  |
| <b>Glycerophospholipid metabolism</b>                      | 86  | 8.2828  | 11 | 0.20011  | 1 | 0.42024 | 0.45882  |
| <b>Phenylalanine, tyrosine and tryptophan biosynthesis</b> | 11  | 1.0594  | 2  | 0.2869   | 1 | 0.58779 | 0.8      |
| <b>Tyrosine metabolism</b>                                 | 88  | 8.4754  | 10 | 0.33861  | 1 | 0.67722 | 0.37931  |
| <b>Pyrimidine metabolism</b>                               | 99  | 9.5348  | 11 | 0.35434  | 1 | 0.6922  | 0.80612  |
| <b>Tryptophan metabolism</b>                               | 84  | 8.0902  | 9  | 0.42054  | 1 | 0.80286 | 0.36145  |
| <b>Drug metabolism - cytochrome P450</b>                   | 98  | 9.4385  | 10 | 0.47399  | 1 | 0.88478 | 0.19588  |
| <b>Vitamin B6 metabolism</b>                               | 21  | 2.0225  | 2  | 0.61504  | 1 | 1       | 0.35     |
| <b>alpha-Linolenic acid metabolism</b>                     | 22  | 2.1189  | 2  | 0.64085  | 1 | 1       | 0.095238 |
| <b>Purine metabolism</b>                                   | 166 | 15.988  | 15 | 0.64734  | 1 | 1       | 0.77576  |
| <b>Terpenoid backbone biosynthesis</b>                     | 36  | 3.4672  | 3  | 0.68896  | 1 | 1       | 0.2      |
| <b>Fatty acid degradation</b>                              | 102 | 9.8238  | 8  | 0.78266  | 1 | 1       | 0.69307  |



|                                                                   |     |        |    |         |   |   |          |
|-------------------------------------------------------------------|-----|--------|----|---------|---|---|----------|
| <b>Nicotinate and nicotinamide metabolism</b>                     | 42  | 4.0451 | 3  | 0.78559 | 1 | 1 | 0.5122   |
| <b>Metabolism of xenobiotics by cytochrome P450</b>               | 145 | 13.965 | 11 | 0.84325 | 1 | 1 | 0.38889  |
| <b>Seleno compound metabolism</b>                                 | 35  | 3.3709 | 2  | 0.86527 | 1 | 1 | 0.14706  |
| <b>Biotin metabolism</b>                                          | 21  | 2.0225 | 1  | 0.88186 | 1 | 1 | 0.05     |
| <b>Ether lipid metabolism</b>                                     | 39  | 3.7561 | 2  | 0.90251 | 1 | 1 | 0.10526  |
| <b>Drug metabolism - other enzymes</b>                            | 70  | 6.7418 | 4  | 0.91785 | 1 | 1 | 0.10145  |
| <b>Folate biosynthesis</b>                                        | 61  | 5.875  | 3  | 0.94347 | 1 | 1 | 0.16667  |
| <b>Porphyrin and chlorophyll metabolism</b>                       | 53  | 5.1045 | 2  | 0.97021 | 1 | 1 | 0.038462 |
| <b>Various types of N-glycan biosynthesis</b>                     | 36  | 3.4672 | 1  | 0.97461 | 1 | 1 | 0.057143 |
| <b>Biosynthesis of unsaturated fatty acids</b>                    | 47  | 4.5266 | 1  | 0.99183 | 1 | 1 | 0.47826  |
| <b>Fatty acid elongation</b>                                      | 75  | 7.2234 | 2  | 0.99588 | 1 | 1 | 0.2973   |
| <b>Primary bile acid biosynthesis</b>                             | 92  | 8.8607 | 2  | 0.99916 | 1 | 1 | 0.043956 |
| <b>N-Glycan biosynthesis</b>                                      | 77  | 7.416  | 1  | 0.99964 | 1 | 1 | 0.026316 |
| <b>Glycosphingolipid biosynthesis - lacto and neolacto series</b> | 121 | 11.654 | 1  | 1       | 1 | 1 | 0.033333 |
| <b>Fatty acid biosynthesis</b>                                    | 129 | 12.424 | 1  | 1       | 1 | 1 | 0.046875 |
| <b>Steroid hormone biosynthesis</b>                               | 199 | 19.166 | 3  | 1       | 1 | 1 | 0.060606 |

**Supplementary Table 4. List of signalling molecules whose phosphorylation increased or decreased in astrocytes.**

**For Figure 3A**

**Upregulated phosphoprotein**

| <b>Protein</b> | <b>Phosphorylation site</b> | <b>Effect</b> |
|----------------|-----------------------------|---------------|
| AKT            | S246                        | Activation    |
| AKT            | T308                        | Activation    |
| AKT            | T450                        | Activation    |
| AKT            | S473                        | Activation    |

|              |           |            |
|--------------|-----------|------------|
| AKT1         | S246      | Activation |
| AKT2         | S474      | Activation |
| GSK3 $\beta$ | S9        | Inhibition |
| MEK2         | S295      | Inhibition |
| mTOR         | T2446     | Activation |
| mTOR         | S2448     | Activation |
| mTOR         | S2481     | Activation |
| p85 $\alpha$ | Y607      | Activation |
| p85 $\alpha$ | Y467/Y199 | Activation |

#### Downregulated phosphoprotein

| Protein          | Phosphorylation site | Effect     |
|------------------|----------------------|------------|
| $\beta$ -catenin | S33                  | Inhibition |
| $\beta$ -catenin | S37                  | Inhibition |
| $\beta$ -catenin | Y489                 | Activation |
| $\beta$ -catenin | Y654                 | Activation |
| ERK8             | T175/T177            | Activation |
| MAP3K7           | T187                 | Activation |

#### For Figure 4A

#### Upregulated phosphoprotein

| Protein                      | Phosphorylation site | Effect     |
|------------------------------|----------------------|------------|
| CamkII $\alpha$              | T286                 | Activation |
| CamkII $\beta/\gamma/\delta$ | T287                 | Activation |
| NFAT1                        | S326                 | Activation |
| NFAT3                        | S168/S170            | Activation |
| PKC $\alpha$                 | T638                 | Activation |
| PKC $\alpha$                 | Y657                 | Activation |

#### Downregulated phosphoprotein

| Protein      | Phosphorylation site | Effect     |
|--------------|----------------------|------------|
| AKT          | T308                 | Activation |
| AKT          | S473                 | Activation |
| AKT          | Y474                 | Activation |
| AKT2         | S474                 | Activation |
| mTOR         | T2446                | Activation |
| mTOR         | S2448                | Activation |
| mTOR         | S2481                | Activation |
| p85 $\alpha$ | Y607                 | Activation |
| p85 $\alpha$ | Y467/Y199            | Activation |

**Supplementary Table 5. List of 6,812 NFATC1 targets from the ENCODE database.**

| <b>Symbol</b> | <b>Name</b>                                           |
|---------------|-------------------------------------------------------|
| AAAS          | achalasia, adrenocortical insufficiency, alacrimia    |
| AAGAB         | alpha- and gamma-adaptin binding protein              |
| AAK1          | AP2 associated kinase 1                               |
| AAMDC         | adipogenesis associated, Mth938 domain containing     |
| AAMP          | angio-associated, migratory cell protein              |
| AAR2          | AAR2 splicing factor homolog ( <i>S. cerevisiae</i> ) |
| AARS          | alanyl-tRNA synthetase                                |

|              |                                                                                |
|--------------|--------------------------------------------------------------------------------|
| AARS2        | alanyl-tRNA synthetase 2, mitochondrial                                        |
| AASDH        | aminoadipate-semialdehyde dehydrogenase                                        |
| AATF         | apoptosis antagonizing transcription factor                                    |
| ABCA11P      | ATP-binding cassette, sub-family A (ABC1), member 11, pseudogene               |
| ABCA12       | ATP-binding cassette, sub-family A (ABC1), member 12                           |
| ABCA17P      | ATP-binding cassette, sub-family A (ABC1), member 17, pseudogene               |
| ABCA3        | ATP-binding cassette, sub-family A (ABC1), member 3                            |
| ABCA7        | ATP-binding cassette, sub-family A (ABC1), member 7                            |
| ABCB10       | ATP-binding cassette, sub-family B (MDR/TAP), member 10                        |
| ABCB4        | ATP-binding cassette, sub-family B (MDR/TAP), member 4                         |
| ABCB6        | ATP-binding cassette, sub-family B (MDR/TAP), member 6 (Langereis blood group) |
| ABCC10       | ATP-binding cassette, sub-family C (CFTR/MRP), member 10                       |
| ABCC12       | ATP-binding cassette, sub-family C (CFTR/MRP), member 12                       |
| ABCC4        | ATP-binding cassette, sub-family C (CFTR/MRP), member 4                        |
| ABCD2        | ATP-binding cassette, sub-family D (ALD), member 2                             |
| ABCD4        | ATP-binding cassette, sub-family D (ALD), member 4                             |
| ABCE1        | ATP-binding cassette, sub-family E (OABP), member 1                            |
| ABCF2        | ATP-binding cassette, sub-family F (GCN20), member 2                           |
| ABCF3        | ATP-binding cassette, sub-family F (GCN20), member 3                           |
| ABHD14A      | abhydrolase domain containing 14A                                              |
| ABHD14A-ACY1 | ABHD14A-ACY1 readthrough (NMD candidate)                                       |
| ABHD14B      | abhydrolase domain containing 14B                                              |
| ABHD15       | abhydrolase domain containing 15                                               |
| ABHD17B      | abhydrolase domain containing 17B                                              |
| ABHD5        | abhydrolase domain containing 5                                                |
| ABI1         | abl-interactor 1                                                               |
| ABI2         | abl-interactor 2                                                               |
| ABI3         | ABI family, member 3                                                           |
| ABL1         | ABL proto-oncogene 1, non-receptor tyrosine kinase                             |
| ABRACL       | ABRA C-terminal like                                                           |
| ABT1         | activator of basal transcription 1                                             |
| ABTB1        | ankyrin repeat and BTB (POZ) domain containing 1                               |
| ACAA1        | acetyl-CoA acyltransferase 1                                                   |
| ACACA        | acetyl-CoA carboxylase alpha                                                   |
| ACAD10       | acyl-CoA dehydrogenase family, member 10                                       |
| ACAD11       | acyl-CoA dehydrogenase family, member 11                                       |
| ACAD9        | acyl-CoA dehydrogenase family, member 9                                        |
| ACADM        | acyl-CoA dehydrogenase, C-4 to C-12 straight chain                             |
| ACADS        | acyl-CoA dehydrogenase, C-2 to C-3 short chain                                 |
| ACADVL       | acyl-CoA dehydrogenase, very long chain                                        |
| ACAP3        | ArfGAP with coiled-coil, ankyrin repeat and PH domains 3                       |

|            |                                                                                  |
|------------|----------------------------------------------------------------------------------|
| ACAT1      | acetyl-CoA acetyltransferase 1                                                   |
| ACAT2      | acetyl-CoA acetyltransferase 2                                                   |
| ACBD3      | acyl-CoA binding domain containing 3                                             |
| ACBD5      | acyl-CoA binding domain containing 5                                             |
| ACBD6      | acyl-CoA binding domain containing 6                                             |
| ACCS       | 1-aminocyclopropane-1-carboxylate synthase homolog (Arabidopsis)(non-functional) |
| ACD        | adrenocortical dysplasia homolog (mouse)                                         |
| ACIN1      | apoptotic chromatin condensation inducer 1                                       |
| ACKR3      | atypical chemokine receptor 3                                                    |
| ACO2       | aconitase 2, mitochondrial                                                       |
| ACOT13     | acyl-CoA thioesterase 13                                                         |
| ACOT2      | acyl-CoA thioesterase 2                                                          |
| ACOT8      | acyl-CoA thioesterase 8                                                          |
| ACOX1      | acyl-CoA oxidase 1, palmitoyl                                                    |
| ACOX3      | acyl-CoA oxidase 3, pristanoyl                                                   |
| ACP2       | acid phosphatase 2, lysosomal                                                    |
| ACPT       | acid phosphatase, testicular                                                     |
| ACSL1      | acyl-CoA synthetase long-chain family member 1                                   |
| ACTA2      | actin, alpha 2, smooth muscle, aorta                                             |
| ACTB       | actin, beta                                                                      |
| ACTG1      | actin gamma 1                                                                    |
| ACTL10     | actin-like 10                                                                    |
| ACTL6A     | actin-like 6A                                                                    |
| ACTN4      | actinin, alpha 4                                                                 |
| ACTR1B     | ARP1 actin-related protein 1 homolog B, centractin beta (yeast)                  |
| ACTR2      | ARP2 actin-related protein 2 homolog (yeast)                                     |
| ACTR3      | ARP3 actin-related protein 3 homolog (yeast)                                     |
| ACTR3C     | ARP3 actin-related protein 3 homolog C (yeast)                                   |
| ACTR5      | ARP5 actin-related protein 5 homolog (yeast)                                     |
| ACTR6      | ARP6 actin-related protein 6 homolog (yeast)                                     |
| ACTR8      | ARP8 actin-related protein 8 homolog (yeast)                                     |
| ACY3       | aminoacylase 3                                                                   |
| ACYP2      | acylphosphatase 2, muscle type                                                   |
| ADAL       | adenosine deaminase-like                                                         |
| ADAM15     | ADAM metallopeptidase domain 15                                                  |
| ADAM17     | ADAM metallopeptidase domain 17                                                  |
| ADAM22     | ADAM metallopeptidase domain 22                                                  |
| ADAM8      | ADAM metallopeptidase domain 8                                                   |
| ADAR       | adenosine deaminase, RNA-specific                                                |
| ADARB2-AS1 | ADARB2 antisense RNA 1                                                           |
| ADAT1      | adenosine deaminase, tRNA-specific 1                                             |

|         |                                                      |
|---------|------------------------------------------------------|
| ADAT2   | adenosine deaminase, tRNA-specific 2                 |
| ADAT3   | adenosine deaminase, tRNA-specific 3                 |
| ADCK1   | aarF domain containing kinase 1                      |
| ADCK3   | aarF domain containing kinase 3                      |
| ADCK4   | aarF domain containing kinase 4                      |
| ADCK5   | aarF domain containing kinase 5                      |
| ADD1    | adducin 1 (alpha)                                    |
| ADGRE2  | adhesion G protein-coupled receptor E2               |
| ADGRE5  | adhesion G protein-coupled receptor E5               |
| ADGRF3  | adhesion G protein-coupled receptor F3               |
| ADGRG5  | adhesion G protein-coupled receptor G5               |
| ADH5    | alcohol dehydrogenase 5 (class III), chi polypeptide |
| ADHFE1  | alcohol dehydrogenase, iron containing, 1            |
| ADI1    | acireductone dioxygenase 1                           |
| ADIG    | adipogenin                                           |
| ADIPOR1 | adiponectin receptor 1                               |
| ADM5    | adrenomedullin 5 (putative)                          |
| ADNP    | activity-dependent neuroprotector homeobox           |
| ADO     | 2-aminoethanethiol (cysteamine) dioxygenase          |
| ADPGK   | ADP-dependent glucokinase                            |
| ADPRH   | ADP-ribosylarginine hydrolase                        |
| ADPRHL2 | ADP-ribosylhydrolase like 2                          |
| ADRBK1  | adrenergic, beta, receptor kinase 1                  |
| ADRM1   | adhesion regulating molecule 1                       |
| ADSL    | adenylosuccinate lyase                               |
| ADSS    | adenylosuccinate synthase                            |
| AEN     | apoptosis enhancing nuclease                         |
| AFF1    | AF4/FMR2 family, member 1                            |
| AFF3    | AF4/FMR2 family, member 3                            |
| AFF4    | AF4/FMR2 family, member 4                            |
| AFG3L1P | AFG3-like AAA ATPase 1, pseudogene                   |
| AFMID   | arylformamidase                                      |
| AFTPH   | aftiphilin                                           |
| AGA     | aspartylglucosaminidase                              |
| AGBL2   | ATP/GTP binding protein-like 2                       |
| AGBL5   | ATP/GTP binding protein-like 5                       |
| AGER    | advanced glycosylation end product-specific receptor |
| AGFG2   | ArfGAP with FG repeats 2                             |
| AGGF1   | angiogenic factor with G patch and FHA domains 1     |
| AGL     | amylase-1, 6-glucosidase, 4-alpha-glucanotransferase |
| AGO1    | argonaute RISC catalytic component 1                 |

|          |                                                                         |
|----------|-------------------------------------------------------------------------|
| AGO2     | argonaute RISC catalytic component 2                                    |
| AGO3     | argonaute RISC catalytic component 3                                    |
| AGPAT3   | 1-acylglycerol-3-phosphate O-acyltransferase 3                          |
| AGPAT5   | 1-acylglycerol-3-phosphate O-acyltransferase 5                          |
| AGPS     | alkylglycerone phosphate synthase                                       |
| AHCYL2   | adenosylhomocysteinase-like 2                                           |
| AICDA    | activation-induced cytidine deaminase                                   |
| AIDA     | axin interactor, dorsalization associated                               |
| AIM1     | absent in melanoma 1                                                    |
| AIM2     | absent in melanoma 2                                                    |
| AIMP1    | aminoacyl tRNA synthetase complex-interacting multifunctional protein 1 |
| AIMP2    | aminoacyl tRNA synthetase complex-interacting multifunctional protein 2 |
| AIP      | aryl hydrocarbon receptor interacting protein                           |
| AK2      | adenylate kinase 2                                                      |
| AKAP1    | A kinase (PRKA) anchor protein 1                                        |
| AKAP10   | A kinase (PRKA) anchor protein 10                                       |
| AKAP5    | A kinase (PRKA) anchor protein 5                                        |
| AKAP8    | A kinase (PRKA) anchor protein 8                                        |
| AKAP8L   | A kinase (PRKA) anchor protein 8-like                                   |
| AKAP9    | A kinase (PRKA) anchor protein 9                                        |
| AKIP1    | A kinase (PRKA) interacting protein 1                                   |
| AKIRIN2  | akirin 2                                                                |
| AKR1A1   | aldo-keto reductase family 1, member A1 (aldehyde reductase)            |
| AKR1B15  | aldo-keto reductase family 1, member B15                                |
| AKT1S1   | AKT1 substrate 1 (proline-rich)                                         |
| AKT2     | v-akt murine thymoma viral oncogene homolog 2                           |
| AKTIP    | AKT interacting protein                                                 |
| ALAS1    | 5'-aminolevulinatase synthase 1                                         |
| ALCAM    | activated leukocyte cell adhesion molecule                              |
| ALDH16A1 | aldehyde dehydrogenase 16 family, member A1                             |
| ALDH18A1 | aldehyde dehydrogenase 18 family, member A1                             |
| ALDH3A1  | aldehyde dehydrogenase 3 family, member A1                              |
| ALDH4A1  | aldehyde dehydrogenase 4 family, member A1                              |
| ALDH6A1  | aldehyde dehydrogenase 6 family, member A1                              |
| ALDH9A1  | aldehyde dehydrogenase 9 family, member A1                              |
| ALDOA    | aldolase A, fructose-bisphosphate                                       |
| ALG10B   | ALG10B, alpha-1,2-glucosyltransferase                                   |
| ALG14    | ALG14, UDP-N-acetylglucosaminyltransferase subunit                      |
| ALG2     | ALG2, alpha-1,3/1,6-mannosyltransferase                                 |
| ALG3     | ALG3, alpha-1,3- mannosyltransferase                                    |
| ALG5     | ALG5, dolichyl-phosphate beta-glucosyltransferase                       |

|                 |                                                              |
|-----------------|--------------------------------------------------------------|
| ALKBH1          | alkB, alkylation repair homolog 1 (E. coli)                  |
| ALKBH2          | alkB, alkylation repair homolog 2 (E. coli)                  |
| ALKBH3          | alkB, alkylation repair homolog 3 (E. coli)                  |
| ALKBH4          | alkB, alkylation repair homolog 4 (E. coli)                  |
| ALKBH5          | AlkB family member 5, RNA demethylase                        |
| ALKBH7          | alkB, alkylation repair homolog 7 (E. coli)                  |
| ALOXE3          | arachidonate lipoxygenase 3                                  |
| ALYREF          | Aly/REF export factor                                        |
| AMACR           | alpha-methylacyl-CoA racemase                                |
| AMD1            | adenosylmethionine decarboxylase 1                           |
| AMDHD2          | amidohydrolase domain containing 2                           |
| AMH             | anti-Mullerian hormone                                       |
| AMIGO3          | adhesion molecule with Ig-like domain 3                      |
| AMN1            | antagonist of mitotic exit network 1 homolog (S. cerevisiae) |
| AMPD2           | adenosine monophosphate deaminase 2                          |
| AMT             | aminomethyltransferase                                       |
| AMZ2            | archaelysin family metallopeptidase 2                        |
| AMZ2P1          | archaelysin family metallopeptidase 2 pseudogene 1           |
| ANAPC1          | anaphase promoting complex subunit 1                         |
| ANAPC10         | anaphase promoting complex subunit 10                        |
| ANAPC11         | anaphase promoting complex subunit 11                        |
| ANAPC13         | anaphase promoting complex subunit 13                        |
| ANAPC15         | anaphase promoting complex subunit 15                        |
| ANAPC16         | anaphase promoting complex subunit 16                        |
| ANAPC2          | anaphase promoting complex subunit 2                         |
| ANAPC4          | anaphase promoting complex subunit 4                         |
| ANAPC7          | anaphase promoting complex subunit 7                         |
| ANG             | angiogenin, ribonuclease, RNase A family, 5                  |
| ANGPTL6         | angiopoietin-like 6                                          |
| ANKAR           | ankyrin and armadillo repeat containing                      |
| ANKFY1          | ankyrin repeat and FYVE domain containing 1                  |
| ANKHD1          | ankyrin repeat and KH domain containing 1                    |
| ANKHD1-EIF4EBP3 | ANKHD1-EIF4EBP3 readthrough                                  |
| ANKLE1          | ankyrin repeat and LEM domain containing 1                   |
| ANKLE2          | ankyrin repeat and LEM domain containing 2                   |
| ANKMY2          | ankyrin repeat and MYND domain containing 2                  |
| ANKRD10         | ankyrin repeat domain 10                                     |
| ANKRD11         | ankyrin repeat domain 11                                     |
| ANKRD12         | ankyrin repeat domain 12                                     |
| ANKRD13A        | ankyrin repeat domain 13A                                    |
| ANKRD13B        | ankyrin repeat domain 13B                                    |



|          |                                                                  |
|----------|------------------------------------------------------------------|
| ANKRD13C | ankyrin repeat domain 13C                                        |
| ANKRD13D | ankyrin repeat domain 13 family, member D                        |
| ANKRD16  | ankyrin repeat domain 16                                         |
| ANKRD17  | ankyrin repeat domain 17                                         |
| ANKRD26  | ankyrin repeat domain 26                                         |
| ANKRD32  | ankyrin repeat domain 32                                         |
| ANKRD33B | ankyrin repeat domain 33B                                        |
| ANKRD37  | ankyrin repeat domain 37                                         |
| ANKRD39  | ankyrin repeat domain 39                                         |
| ANKRD40  | ankyrin repeat domain 40                                         |
| ANKRD42  | ankyrin repeat domain 42                                         |
| ANKRD46  | ankyrin repeat domain 46                                         |
| ANKRD54  | ankyrin repeat domain 54                                         |
| ANKS1A   | ankyrin repeat and sterile alpha motif domain containing 1A      |
| ANKZF1   | ankyrin repeat and zinc finger domain containing 1               |
| ANO6     | anoctamin 6                                                      |
| ANO8     | anoctamin 8                                                      |
| ANP32A   | acidic (leucine-rich) nuclear phosphoprotein 32 family, member A |
| ANP32B   | acidic (leucine-rich) nuclear phosphoprotein 32 family, member B |
| ANP32E   | acidic (leucine-rich) nuclear phosphoprotein 32 family, member E |
| ANXA2    | annexin A2                                                       |
| ANXA2R   | annexin A2 receptor                                              |
| ANXA4    | annexin A4                                                       |
| ANXA6    | annexin A6                                                       |
| ANXA7    | annexin A7                                                       |
| AOC2     | amine oxidase, copper containing 2 (retina-specific)             |
| AP1AR    | adaptor-related protein complex 1 associated regulatory protein  |
| AP1G1    | adaptor-related protein complex 1, gamma 1 subunit               |
| AP1G2    | adaptor-related protein complex 1, gamma 2 subunit               |
| AP1S2    | adaptor-related protein complex 1, sigma 2 subunit               |
| AP1S3    | adaptor-related protein complex 1, sigma 3 subunit               |
| AP2B1    | adaptor-related protein complex 2, beta 1 subunit                |
| AP2M1    | adaptor-related protein complex 2, mu 1 subunit                  |
| AP2S1    | adaptor-related protein complex 2, sigma 1 subunit               |
| AP3B1    | adaptor-related protein complex 3, beta 1 subunit                |
| AP3M2    | adaptor-related protein complex 3, mu 2 subunit                  |
| AP3S1    | adaptor-related protein complex 3, sigma 1 subunit               |
| AP3S2    | adaptor-related protein complex 3, sigma 2 subunit               |
| AP4B1    | adaptor-related protein complex 4, beta 1 subunit                |
| AP4E1    | adaptor-related protein complex 4, epsilon 1 subunit             |
| AP4M1    | adaptor-related protein complex 4, mu 1 subunit                  |

|             |                                                                                         |
|-------------|-----------------------------------------------------------------------------------------|
| AP5S1       | adaptor-related protein complex 5, sigma 1 subunit                                      |
| AP5Z1       | adaptor-related protein complex 5, zeta 1 subunit                                       |
| APAF1       | apoptotic peptidase activating factor 1                                                 |
| APBA3       | amyloid beta (A4) precursor protein-binding, family A, member 3                         |
| APBB1IP     | amyloid beta (A4) precursor protein-binding, family B, member 1 interacting protein     |
| APBB2       | amyloid beta (A4) precursor protein-binding, family B, member 2                         |
| APBB3       | amyloid beta (A4) precursor protein-binding, family B, member 3                         |
| APEH        | acylaminoacyl-peptide hydrolase                                                         |
| APEX1       | APEX nuclease (multifunctional DNA repair enzyme) 1                                     |
| API5        | apoptosis inhibitor 5                                                                   |
| APITD1      | apoptosis-inducing, TAF9-like domain 1                                                  |
| APITD1-CORT | APITD1-CORT readthrough                                                                 |
| APOA1BP     | apolipoprotein A-I binding protein                                                      |
| APOBEC3H    | apolipoprotein B mRNA editing enzyme, catalytic polypeptide-like 3H                     |
| APOBR       | apolipoprotein B receptor                                                               |
| APOC4       | apolipoprotein C-IV                                                                     |
| APOC4-APOC2 | APOC4-APOC2 readthrough (NMD candidate)                                                 |
| APOE        | apolipoprotein E                                                                        |
| APOL2       | apolipoprotein L, 2                                                                     |
| APOLD1      | apolipoprotein L domain containing 1                                                    |
| APOM        | apolipoprotein M                                                                        |
| APOO        | apolipoprotein O                                                                        |
| APPL1       | adaptor protein, phosphotyrosine interaction, PH domain and leucine zipper containing 1 |
| APRT        | adenine phosphoribosyltransferase                                                       |
| APTX        | aprataxin                                                                               |
| AQP1        | aquaporin 1 (Colton blood group)                                                        |
| AQP11       | aquaporin 11                                                                            |
| AQP3        | aquaporin 3 (Gill blood group)                                                          |
| AQR         | aquarius intron-binding spliceosomal factor                                             |
| ARAP2       | ArfGAP with RhoGAP domain, ankyrin repeat and PH domain 2                               |
| ARF1        | ADP-ribosylation factor 1                                                               |
| ARF3        | ADP-ribosylation factor 3                                                               |
| ARF4        | ADP-ribosylation factor 4                                                               |
| ARF6        | ADP-ribosylation factor 6                                                               |
| ARFGAP2     | ADP-ribosylation factor GTPase activating protein 2                                     |
| ARFGAP3     | ADP-ribosylation factor GTPase activating protein 3                                     |
| ARFIP1      | ADP-ribosylation factor interacting protein 1                                           |
| ARFIP2      | ADP-ribosylation factor interacting protein 2                                           |
| ARHGAP1     | Rho GTPase activating protein 1                                                         |
| ARHGAP10    | Rho GTPase activating protein 10                                                        |

|                |                                                      |
|----------------|------------------------------------------------------|
| ARHGAP15       | Rho GTPase activating protein 15                     |
| ARHGAP17       | Rho GTPase activating protein 17                     |
| ARHGAP19       | Rho GTPase activating protein 19                     |
| ARHGAP19-SLIT1 | ARHGAP19-SLIT1 readthrough (NMD candidate)           |
| ARHGAP21       | Rho GTPase activating protein 21                     |
| ARHGAP22       | Rho GTPase activating protein 22                     |
| ARHGAP30       | Rho GTPase activating protein 30                     |
| ARHGAP31       | Rho GTPase activating protein 31                     |
| ARHGAP4        | Rho GTPase activating protein 4                      |
| ARHGAP9        | Rho GTPase activating protein 9                      |
| ARHGDI A       | Rho GDP dissociation inhibitor (GDI) alpha           |
| ARHGDI B       | Rho GDP dissociation inhibitor (GDI) beta            |
| ARHGEF1        | Rho guanine nucleotide exchange factor (GEF) 1       |
| ARHGEF12       | Rho guanine nucleotide exchange factor (GEF) 12      |
| ARHGEF2        | Rho/Rac guanine nucleotide exchange factor (GEF) 2   |
| ARID1A         | AT rich interactive domain 1A (SWI-like)             |
| ARID1B         | AT rich interactive domain 1B (SWI1-like)            |
| ARID2          | AT rich interactive domain 2 (ARID, RFX-like)        |
| ARID3A         | AT rich interactive domain 3A (BRIGHT-like)          |
| ARID3B         | AT rich interactive domain 3B (BRIGHT-like)          |
| ARID4A         | AT rich interactive domain 4A (RBP1-like)            |
| ARID4B         | AT rich interactive domain 4B (RBP1-like)            |
| ARID5A         | AT rich interactive domain 5A (MRF1-like)            |
| ARID5B         | AT rich interactive domain 5B (MRF1-like)            |
| ARIH1          | ariadne RBR E3 ubiquitin protein ligase 1            |
| ARIH2          | ariadne RBR E3 ubiquitin protein ligase 2            |
| ARIH2OS        | ariadne homolog 2 opposite strand                    |
| ARL1           | ADP-ribosylation factor-like 1                       |
| ARL11          | ADP-ribosylation factor-like 11                      |
| ARL14EP        | ADP-ribosylation factor-like 14 effector protein     |
| ARL15          | ADP-ribosylation factor-like 15                      |
| ARL2           | ADP-ribosylation factor-like 2                       |
| ARL2-SNX15     | ARL2-SNX15 readthrough (NMD candidate)               |
| ARL2BP         | ADP-ribosylation factor-like 2 binding protein       |
| ARL3           | ADP-ribosylation factor-like 3                       |
| ARL5A          | ADP-ribosylation factor-like 5A                      |
| ARL5B          | ADP-ribosylation factor-like 5B                      |
| ARL6IP1        | ADP-ribosylation factor-like 6 interacting protein 1 |
| ARL6IP4        | ADP-ribosylation factor-like 6 interacting protein 4 |
| ARL6IP5        | ADP-ribosylation factor-like 6 interacting protein 5 |
| ARL6IP6        | ADP-ribosylation factor-like 6 interacting protein 6 |

|             |                                                           |
|-------------|-----------------------------------------------------------|
| ARL8A       | ADP-ribosylation factor-like 8A                           |
| ARL8B       | ADP-ribosylation factor-like 8B                           |
| ARMC1       | armadillo repeat containing 1                             |
| ARMC5       | armadillo repeat containing 5                             |
| ARMC6       | armadillo repeat containing 6                             |
| ARMC7       | armadillo repeat containing 7                             |
| ARMC8       | armadillo repeat containing 8                             |
| ARMC9       | armadillo repeat containing 9                             |
| ARMT1       | acidic residue methyltransferase 1                        |
| ARPC1A      | actin related protein 2/3 complex, subunit 1A, 41kDa      |
| ARPC1B      | actin related protein 2/3 complex, subunit 1B, 41kDa      |
| ARPC2       | actin related protein 2/3 complex, subunit 2, 34kDa       |
| ARPC3       | actin related protein 2/3 complex, subunit 3, 21kDa       |
| ARPC4       | actin related protein 2/3 complex, subunit 4, 20kDa       |
| ARPC4-TTLL3 | ARPC4-TTLL3 readthrough                                   |
| ARPC5       | actin related protein 2/3 complex, subunit 5, 16kDa       |
| ARPC5L      | actin related protein 2/3 complex, subunit 5-like         |
| ARRDC1-AS1  | ARRDC1 antisense RNA 1                                    |
| ARRDC3      | arrestin domain containing 3                              |
| ARSB        | arylsulfatase B                                           |
| ARSK        | arylsulfatase family, member K                            |
| ART3        | ADP-ribosyltransferase 3                                  |
| ASAH1       | N-acylsphingosine amidohydrolase (acid ceramidase) 1      |
| ASAP1       | ArfGAP with SH3 domain, ankyrin repeat and PH domain 1    |
| ASB1        | ankyrin repeat and SOCS box containing 1                  |
| ASB13       | ankyrin repeat and SOCS box containing 13                 |
| ASB16-AS1   | ASB16 antisense RNA 1                                     |
| ASB2        | ankyrin repeat and SOCS box containing 2                  |
| ASB3        | ankyrin repeat and SOCS box containing 3                  |
| ASB6        | ankyrin repeat and SOCS box containing 6                  |
| ASB8        | ankyrin repeat and SOCS box containing 8                  |
| ASCC1       | activating signal cointegrator 1 complex subunit 1        |
| ASCC3       | activating signal cointegrator 1 complex subunit 3        |
| ASF1A       | anti-silencing function 1A histone chaperone              |
| ASH1L       | ash1 (absent, small, or homeotic)-like (Drosophila)       |
| ASH2L       | ash2 (absent, small, or homeotic)-like (Drosophila)       |
| ASMTL-AS1   | ASMTL antisense RNA 1                                     |
| ASNSD1      | asparagine synthetase domain containing 1                 |
| ASPH        | aspartate beta-hydroxylase                                |
| ASPSCR1     | alveolar soft part sarcoma chromosome region, candidate 1 |
| ASTL        | astacin-like metallo-endopeptidase (M12 family)           |

|            |                                                                                             |
|------------|---------------------------------------------------------------------------------------------|
| ASUN       | asunder spermatogenesis regulator                                                           |
| ASXL1      | additional sex combs like transcriptional regulator 1                                       |
| ASXL2      | additional sex combs like transcriptional regulator 2                                       |
| ATAD1      | ATPase family, AAA domain containing 1                                                      |
| ATAD2      | ATPase family, AAA domain containing 2                                                      |
| ATAD2B     | ATPase family, AAA domain containing 2B                                                     |
| ATAD5      | ATPase family, AAA domain containing 5                                                      |
| ATF1       | activating transcription factor 1                                                           |
| ATF2       | activating transcription factor 2                                                           |
| ATF3       | activating transcription factor 3                                                           |
| ATF4       | activating transcription factor 4                                                           |
| ATF5       | activating transcription factor 5                                                           |
| ATF6       | activating transcription factor 6                                                           |
| ATF7       | activating transcription factor 7                                                           |
| ATF7IP     | activating transcription factor 7 interacting protein                                       |
| ATG101     | autophagy related 101                                                                       |
| ATG12      | autophagy related 12                                                                        |
| ATG16L1    | autophagy related 16-like 1 ( <i>S. cerevisiae</i> )                                        |
| ATG16L2    | autophagy related 16-like 2 ( <i>S. cerevisiae</i> )                                        |
| ATG3       | autophagy related 3                                                                         |
| ATG4C      | autophagy related 4C, cysteine peptidase                                                    |
| ATG5       | autophagy related 5                                                                         |
| ATG9A      | autophagy related 9A                                                                        |
| ATIC       | 5-aminoimidazole-4-carboxamide ribonucleotide formyltransferase/IMP cyclohydrolase          |
| ATL2       | atlastin GTPase 2                                                                           |
| ATL3       | atlastin GTPase 3                                                                           |
| ATM        | ATM serine/threonine kinase                                                                 |
| ATN1       | atrophin 1                                                                                  |
| ATOX1      | antioxidant 1 copper chaperone                                                              |
| ATP10D     | ATPase, class V, type 10D                                                                   |
| ATP13A1    | ATPase type 13A1                                                                            |
| ATP1A1-AS1 | ATP1A1 antisense RNA 1                                                                      |
| ATP1A3     | ATPase, Na <sup>+</sup> /K <sup>+</sup> transporting, alpha 3 polypeptide                   |
| ATP2A3     | ATPase, Ca <sup>++</sup> transporting, ubiquitous                                           |
| ATP2C1     | ATPase, Ca <sup>++</sup> transporting, type 2C, member 1                                    |
| ATP5B      | ATP synthase, H <sup>+</sup> transporting, mitochondrial F1 complex, beta polypeptide       |
| ATP5E      | ATP synthase, H <sup>+</sup> transporting, mitochondrial F1 complex, epsilon subunit        |
| ATP5G1     | ATP synthase, H <sup>+</sup> transporting, mitochondrial Fo complex, subunit C1 (subunit 9) |
| ATP5G2     | ATP synthase, H <sup>+</sup> transporting, mitochondrial Fo complex, subunit C2 (subunit 9) |
| ATP5G3     | ATP synthase, H <sup>+</sup> transporting, mitochondrial Fo complex, subunit C3 (subunit 9) |
| ATP5I      | ATP synthase, H <sup>+</sup> transporting, mitochondrial Fo complex, subunit E              |

|          |                                                                          |
|----------|--------------------------------------------------------------------------|
| ATP5J    | ATP synthase, H+ transporting, mitochondrial Fo complex, subunit F6      |
| ATP5L    | ATP synthase, H+ transporting, mitochondrial Fo complex, subunit G       |
| ATP5SL   | ATP5S-like                                                               |
| ATP6V0A2 | ATPase, H+ transporting, lysosomal V0 subunit a2                         |
| ATP6V0B  | ATPase, H+ transporting, lysosomal 21kDa, V0 subunit b                   |
| ATP6V0D1 | ATPase, H+ transporting, lysosomal 38kDa, V0 subunit d1                  |
| ATP6V1A  | ATPase, H+ transporting, lysosomal 70kDa, V1 subunit A                   |
| ATP6V1C1 | ATPase, H+ transporting, lysosomal 42kDa, V1 subunit C1                  |
| ATP6V1D  | ATPase, H+ transporting, lysosomal 34kDa, V1 subunit D                   |
| ATP6V1G1 | ATPase, H+ transporting, lysosomal 13kDa, V1 subunit G1                  |
| ATP6V1G2 | ATPase, H+ transporting, lysosomal 13kDa, V1 subunit G2                  |
| ATP6V1H  | ATPase, H+ transporting, lysosomal 50/57kDa, V1 subunit H                |
| ATP8A1   | ATPase, aminophospholipid transporter (APLT), class I, type 8A, member 1 |
| ATP8B3   | ATPase, aminophospholipid transporter, class I, type 8B, member 3        |
| ATPAF2   | ATP synthase mitochondrial F1 complex assembly factor 2                  |
| ATPIF1   | ATPase inhibitory factor 1                                               |
| ATR      | ATR serine/threonine kinase                                              |
| ATRAID   | all-trans retinoic acid-induced differentiation factor                   |
| ATRIP    | ATR interacting protein                                                  |
| ATXN1    | ataxin 1                                                                 |
| ATXN1L   | ataxin 1-like                                                            |
| ATXN2    | ataxin 2                                                                 |
| ATXN2L   | ataxin 2-like                                                            |
| ATXN7    | ataxin 7                                                                 |
| ATXN7L2  | ataxin 7-like 2                                                          |
| ATXN7L3  | ataxin 7-like 3                                                          |
| AUNIP    | aurora kinase A and ninein interacting protein                           |
| AUP1     | ancient ubiquitous protein 1                                             |
| AURKAIP1 | aurora kinase A interacting protein 1                                    |
| AVPR2    | arginine vasopressin receptor 2                                          |
| AXDND1   | axonemal dynein light chain domain containing 1                          |
| AZIN1    | antizyme inhibitor 1                                                     |
| B2M      | beta-2-microglobulin                                                     |
| B3GALNT2 | beta-1,3-N-acetylgalactosaminyltransferase 2                             |
| B3GALT4  | UDP-Gal:betaGlcNAc beta 1,3-galactosyltransferase, polypeptide 4         |
| B3GALT6  | UDP-Gal:betaGal beta 1,3-galactosyltransferase polypeptide 6             |
| B3GAT3   | beta-1,3-glucuronyltransferase 3                                         |
| B3GNT1   |                                                                          |
| B3GNT7   | UDP-GlcNAc:betaGal beta-1,3-N-acetylglucosaminyltransferase 7            |
| B3GNT9   | UDP-GlcNAc:betaGal beta-1,3-N-acetylglucosaminyltransferase 9            |
| B4GALT1  | UDP-Gal:betaGlcNAc beta 1,4- galactosyltransferase, polypeptide 1        |

|                 |                                                                          |
|-----------------|--------------------------------------------------------------------------|
| <b>B4GALT3</b>  | <b>UDP-Gal:betaGlcNAc beta 1,4- galactosyltransferase, polypeptide 3</b> |
| <b>B4GALT4</b>  | <b>UDP-Gal:betaGlcNAc beta 1,4- galactosyltransferase, polypeptide 4</b> |
| <b>B4GALT6</b>  | <b>UDP-Gal:betaGlcNAc beta 1,4- galactosyltransferase, polypeptide 6</b> |
| <b>B4GALT7</b>  | <b>xylosylprotein beta 1,4-galactosyltransferase, polypeptide 7</b>      |
| <b>B9D1</b>     | <b>B9 protein domain 1</b>                                               |
| <b>B9D2</b>     | <b>B9 protein domain 2</b>                                               |
| <b>BAD</b>      | <b>BCL2-associated agonist of cell death</b>                             |
| <b>BAG2</b>     | <b>BCL2-associated athanogene 2</b>                                      |
| <b>BAG3</b>     | <b>BCL2-associated athanogene 3</b>                                      |
| <b>BAG4</b>     | <b>BCL2-associated athanogene 4</b>                                      |
| <b>BAIAP2L1</b> | <b>BAI1-associated protein 2-like 1</b>                                  |
| <b>BANF1</b>    | <b>barrier to autointegration factor 1</b>                               |
| <b>BANK1</b>    | <b>B-cell scaffold protein with ankyrin repeats 1</b>                    |
| <b>BANP</b>     | <b>BTG3 associated nuclear protein</b>                                   |
| <b>BARD1</b>    | <b>BRCA1 associated RING domain 1</b>                                    |
| <b>BASP1</b>    | <b>brain abundant, membrane attached signal protein 1</b>                |
| <b>BATF</b>     | <b>basic leucine zipper transcription factor, ATF-like</b>               |
| <b>BAX</b>      | <b>BCL2-associated X protein</b>                                         |
| <b>BAZ1A</b>    | <b>bromodomain adjacent to zinc finger domain, 1A</b>                    |
| <b>BAZ1B</b>    | <b>bromodomain adjacent to zinc finger domain, 1B</b>                    |
| <b>BAZ2A</b>    | <b>bromodomain adjacent to zinc finger domain, 2A</b>                    |
| <b>BBC3</b>     | <b>BCL2 binding component 3</b>                                          |
| <b>BBIP1</b>    | <b>BBSome interacting protein 1</b>                                      |
| <b>BBS1</b>     | <b>Bardet-Biedl syndrome 1</b>                                           |
| <b>BBS10</b>    | <b>Bardet-Biedl syndrome 10</b>                                          |
| <b>BCAP29</b>   | <b>B-cell receptor-associated protein 29</b>                             |
| <b>BCAS2</b>    | <b>breast carcinoma amplified sequence 2</b>                             |
| <b>BCAS3</b>    | <b>breast carcinoma amplified sequence 3</b>                             |
| <b>BCAT1</b>    | <b>branched chain amino-acid transaminase 1, cytosolic</b>               |
| <b>BCAT2</b>    | <b>branched chain amino-acid transaminase 2, mitochondrial</b>           |
| <b>BCCIP</b>    | <b>BRCA2 and CDKN1A interacting protein</b>                              |
| <b>BCDIN3D</b>  | <b>BCDIN3 domain containing</b>                                          |
| <b>BCKDHA</b>   | <b>branched chain keto acid dehydrogenase E1, alpha polypeptide</b>      |
| <b>BCKDK</b>    | <b>branched chain ketoacid dehydrogenase kinase</b>                      |
| <b>BCL10</b>    | <b>B-cell CLL/lymphoma 10</b>                                            |
| <b>BCL11A</b>   | <b>B-cell CLL/lymphoma 11A (zinc finger protein)</b>                     |
| <b>BCL2</b>     | <b>B-cell CLL/lymphoma 2</b>                                             |
| <b>BCL2A1</b>   | <b>BCL2-related protein A1</b>                                           |
| <b>BCL2L1</b>   | <b>BCL2-like 1</b>                                                       |
| <b>BCL2L12</b>  | <b>BCL2-like 12 (proline rich)</b>                                       |
| <b>BCL2L13</b>  | <b>BCL2-like 13 (apoptosis facilitator)</b>                              |

|                       |                                                                               |
|-----------------------|-------------------------------------------------------------------------------|
| <b>BCL7C</b>          | <b>B-cell CLL/lymphoma 7C</b>                                                 |
| <b>BCLAF1</b>         | <b>BCL2-associated transcription factor 1</b>                                 |
| <b>BCOR</b>           | <b>BCL6 corepressor</b>                                                       |
| <b>BCRP3</b>          | <b>breakpoint cluster region pseudogene 3</b>                                 |
| <b>BCS1L</b>          | <b>BC1 (ubiquinol-cytochrome c reductase) synthesis-like</b>                  |
| <b>BDNF-AS</b>        | <b>BDNF antisense RNA</b>                                                     |
| <b>BECN1</b>          | <b>beclin 1, autophagy related</b>                                            |
| <b>BEND6</b>          | <b>BEN domain containing 6</b>                                                |
| <b>BEST4</b>          | <b>bestrophin 4</b>                                                           |
| <b>BET1L</b>          | <b>Bet1 golgi vesicular membrane trafficking protein-like</b>                 |
| <b>BFAR</b>           | <b>bifunctional apoptosis regulator</b>                                       |
| <b>BHLHE40</b>        | <b>basic helix-loop-helix family, member e40</b>                              |
| <b>BICD2</b>          | <b>bicaudal D homolog 2 (Drosophila)</b>                                      |
| <b>BIN2</b>           | <b>bridging integrator 2</b>                                                  |
| <b>BIRC2</b>          | <b>baculoviral IAP repeat containing 2</b>                                    |
| <b>BIRC3</b>          | <b>baculoviral IAP repeat containing 3</b>                                    |
| <b>BIRC6</b>          | <b>baculoviral IAP repeat containing 6</b>                                    |
| <b>BIVM</b>           | <b>basic, immunoglobulin-like variable motif containing</b>                   |
| <b>BLCAP</b>          | <b>bladder cancer associated protein</b>                                      |
| <b>BLK</b>            | <b>BLK proto-oncogene, Src family tyrosine kinase</b>                         |
| <b>BLM</b>            | <b>Bloom syndrome, RecQ helicase-like</b>                                     |
| <b>BLNK</b>           | <b>B-cell linker</b>                                                          |
| <b>BLOC1S1</b>        | <b>biogenesis of lysosomal organelles complex-1, subunit 1</b>                |
| <b>BLOC1S1-RDH5</b>   | <b>BLOC1S1-RDH5 readthrough</b>                                               |
| <b>BLOC1S2</b>        | <b>biogenesis of lysosomal organelles complex-1, subunit 2</b>                |
| <b>BLOC1S5</b>        | <b>biogenesis of lysosomal organelles complex-1, subunit 5, muted</b>         |
| <b>BLOC1S5-TXNDC5</b> | <b>BLOC1S5-TXNDC5 readthrough (NMD candidate)</b>                             |
| <b>BLOC1S6</b>        | <b>biogenesis of lysosomal organelles complex-1, subunit 6, pallidin</b>      |
| <b>BLVRA</b>          | <b>biliverdin reductase A</b>                                                 |
| <b>BLVRB</b>          | <b>biliverdin reductase B</b>                                                 |
| <b>BMF</b>            | <b>Bcl2 modifying factor</b>                                                  |
| <b>BMP2K</b>          | <b>BMP2 inducible kinase</b>                                                  |
| <b>BMPR2</b>          | <b>bone morphogenetic protein receptor, type II (serine/threonine kinase)</b> |
| <b>BMS1</b>           | <b>BMS1 ribosome biogenesis factor</b>                                        |
| <b>BMS1P4</b>         | <b>BMS1 ribosome biogenesis factor pseudogene 4</b>                           |
| <b>BNIP1</b>          | <b>BCL2/adenovirus E1B 19kDa interacting protein 1</b>                        |
| <b>BOD1L1</b>         | <b>biorientation of chromosomes in cell division 1-like 1</b>                 |
| <b>BOLA3</b>          | <b>bolA family member 3</b>                                                   |
| <b>BOLA3-AS1</b>      | <b>BOLA3 antisense RNA 1 (head to head)</b>                                   |
| <b>BOP1</b>           | <b>block of proliferation 1</b>                                               |
| <b>BORA</b>           | <b>bora, aurora kinase A activator</b>                                        |



|                  |                                                                                  |
|------------------|----------------------------------------------------------------------------------|
| <b>BPNT1</b>     | <b>3'(2'), 5'-bisphosphate nucleotidase 1</b>                                    |
| <b>BPTF</b>      | <b>bromodomain PHD finger transcription factor</b>                               |
| <b>BRAF</b>      | <b>B-Raf proto-oncogene, serine/threonine kinase</b>                             |
| <b>BRAP</b>      | <b>BRCA1 associated protein</b>                                                  |
| <b>BRCA1</b>     | <b>breast cancer 1, early onset</b>                                              |
| <b>BRCA2</b>     | <b>breast cancer 2, early onset</b>                                              |
| <b>BRD8</b>      | <b>bromodomain containing 8</b>                                                  |
| <b>BRE</b>       | <b>brain and reproductive organ-expressed (TNFRSF1A modulator)</b>               |
| <b>BREA2</b>     | <b>breast cancer estrogen-induced apoptosis 2</b>                                |
| <b>BRF2</b>      | <b>BRF2, RNA polymerase III transcription initiation factor 50 kDa subunit</b>   |
| <b>BRI3BP</b>    | <b>BRI3 binding protein</b>                                                      |
| <b>BRICD5</b>    | <b>BRICHOS domain containing 5</b>                                               |
| <b>BRIP1</b>     | <b>BRCA1 interacting protein C-terminal helicase 1</b>                           |
| <b>BRIX1</b>     | <b>BRX1, biogenesis of ribosomes</b>                                             |
| <b>BRK1</b>      | <b>BRICK1, SCAR/WAVE actin-nucleating complex subunit</b>                        |
| <b>BROX</b>      | <b>BRO1 domain and CAAX motif containing</b>                                     |
| <b>BSCL2</b>     | <b>Berardinelli-Seip congenital lipodystrophy 2 (seipin)</b>                     |
| <b>BSDC1</b>     | <b>BSD domain containing 1</b>                                                   |
| <b>BSG</b>       | <b>basigin (Ok blood group)</b>                                                  |
| <b>BSPRY</b>     | <b>B-box and SPRY domain containing</b>                                          |
| <b>BST2</b>      | <b>bone marrow stromal cell antigen 2</b>                                        |
| <b>BTA1F1</b>    | <b>BTA1F1 RNA polymerase II, B-TFIID transcription factor-associated, 170kDa</b> |
| <b>BTBD19</b>    | <b>BTB (POZ) domain containing 19</b>                                            |
| <b>BTBD6</b>     | <b>BTB (POZ) domain containing 6</b>                                             |
| <b>BTB</b>       | <b>biotinidase</b>                                                               |
| <b>BTF3</b>      | <b>basic transcription factor 3</b>                                              |
| <b>BTF3L4</b>    | <b>basic transcription factor 3-like 4</b>                                       |
| <b>BTG1</b>      | <b>B-cell translocation gene 1, anti-proliferative</b>                           |
| <b>BTG2</b>      | <b>BTG family, member 2</b>                                                      |
| <b>BTLA</b>      | <b>B and T lymphocyte associated</b>                                             |
| <b>BTRC</b>      | <b>beta-transducin repeat containing E3 ubiquitin protein ligase</b>             |
| <b>BUB1</b>      | <b>BUB1 mitotic checkpoint serine/threonine kinase</b>                           |
| <b>BUD13</b>     | <b>BUD13 homolog (S. cerevisiae)</b>                                             |
| <b>BUD31</b>     | <b>BUD31 homolog (S. cerevisiae)</b>                                             |
| <b>BYSL</b>      | <b>bystin-like</b>                                                               |
| <b>BZRAP1</b>    | <b>benzodiazepine receptor (peripheral) associated protein 1</b>                 |
| <b>BZW1</b>      | <b>basic leucine zipper and W2 domains 1</b>                                     |
| <b>BZW2</b>      | <b>basic leucine zipper and W2 domains 2</b>                                     |
| <b>C10ORF10</b>  | <b>chromosome 10 open reading frame 10</b>                                       |
| <b>C10ORF111</b> | <b>chromosome 10 open reading frame 111</b>                                      |
| <b>C10ORF131</b> | <b>chromosome 10 open reading frame 131</b>                                      |

|           |                                      |
|-----------|--------------------------------------|
| C10ORF76  | chromosome 10 open reading frame 76  |
| C10ORF95  | chromosome 10 open reading frame 95  |
| C11ORF1   | chromosome 11 open reading frame 1   |
| C11ORF24  | chromosome 11 open reading frame 24  |
| C11ORF30  | chromosome 11 open reading frame 30  |
| C11ORF31  | chromosome 11 open reading frame 31  |
| C11ORF48  | chromosome 11 open reading frame 48  |
| C11ORF54  | chromosome 11 open reading frame 54  |
| C11ORF58  | chromosome 11 open reading frame 58  |
| C11ORF65  | chromosome 11 open reading frame 65  |
| C11ORF68  | chromosome 11 open reading frame 68  |
| C11ORF71  | chromosome 11 open reading frame 71  |
| C11ORF73  | chromosome 11 open reading frame 73  |
| C11ORF91  | chromosome 11 open reading frame 91  |
| C11ORF94  | chromosome 11 open reading frame 94  |
| C12ORF10  | chromosome 12 open reading frame 10  |
| C12ORF29  | chromosome 12 open reading frame 29  |
| C12ORF4   | chromosome 12 open reading frame 4   |
| C12ORF57  | chromosome 12 open reading frame 57  |
| C12ORF65  | chromosome 12 open reading frame 65  |
| C12ORF73  | chromosome 12 open reading frame 73  |
| C12ORF77  | chromosome 12 open reading frame 77  |
| C14ORF1   | chromosome 14 open reading frame 1   |
| C14ORF119 | chromosome 14 open reading frame 119 |
| C14ORF159 | chromosome 14 open reading frame 159 |
| C14ORF169 | chromosome 14 open reading frame 169 |
| C14ORF2   | chromosome 14 open reading frame 2   |
| C14ORF28  | chromosome 14 open reading frame 28  |
| C14ORF80  | chromosome 14 open reading frame 80  |
| C15ORF39  | chromosome 15 open reading frame 39  |
| C15ORF40  | chromosome 15 open reading frame 40  |
| C15ORF62  | chromosome 15 open reading frame 62  |
| C16ORF13  | chromosome 16 open reading frame 13  |
| C16ORF46  | chromosome 16 open reading frame 46  |
| C16ORF54  | chromosome 16 open reading frame 54  |
| C16ORF62  | chromosome 16 open reading frame 62  |
| C16ORF70  | chromosome 16 open reading frame 70  |
| C16ORF72  | chromosome 16 open reading frame 72  |
| C16ORF86  | chromosome 16 open reading frame 86  |
| C16ORF87  | chromosome 16 open reading frame 87  |
| C16ORF95  | chromosome 16 open reading frame 95  |

|                  |                                             |
|------------------|---------------------------------------------|
| <b>C17ORF100</b> | <b>chromosome 17 open reading frame 100</b> |
| <b>C17ORF49</b>  | <b>chromosome 17 open reading frame 49</b>  |
| <b>C17ORF53</b>  | <b>chromosome 17 open reading frame 53</b>  |
| <b>C17ORF62</b>  | <b>chromosome 17 open reading frame 62</b>  |
| <b>C17ORF70</b>  | <b>chromosome 17 open reading frame 70</b>  |
| <b>C17ORF75</b>  | <b>chromosome 17 open reading frame 75</b>  |
| <b>C17ORF80</b>  | <b>chromosome 17 open reading frame 80</b>  |
| <b>C17ORF85</b>  | <b>chromosome 17 open reading frame 85</b>  |
| <b>C17ORF89</b>  | <b>chromosome 17 open reading frame 89</b>  |
| <b>C17ORF99</b>  | <b>chromosome 17 open reading frame 99</b>  |
| <b>C18ORF21</b>  | <b>chromosome 18 open reading frame 21</b>  |
| <b>C18ORF25</b>  | <b>chromosome 18 open reading frame 25</b>  |
| <b>C18ORF32</b>  | <b>chromosome 18 open reading frame 32</b>  |
| <b>C18ORF8</b>   | <b>chromosome 18 open reading frame 8</b>   |
| <b>C19ORF24</b>  | <b>chromosome 19 open reading frame 24</b>  |
| <b>C19ORF25</b>  | <b>chromosome 19 open reading frame 25</b>  |
| <b>C19ORF43</b>  | <b>chromosome 19 open reading frame 43</b>  |
| <b>C19ORF47</b>  | <b>chromosome 19 open reading frame 47</b>  |
| <b>C19ORF48</b>  | <b>chromosome 19 open reading frame 48</b>  |
| <b>C19ORF52</b>  | <b>chromosome 19 open reading frame 52</b>  |
| <b>C19ORF53</b>  | <b>chromosome 19 open reading frame 53</b>  |
| <b>C19ORF54</b>  | <b>chromosome 19 open reading frame 54</b>  |
| <b>C19ORF60</b>  | <b>chromosome 19 open reading frame 60</b>  |
| <b>C19ORF66</b>  | <b>chromosome 19 open reading frame 66</b>  |
| <b>C19ORF70</b>  | <b>chromosome 19 open reading frame 70</b>  |
| <b>C19ORF71</b>  | <b>chromosome 19 open reading frame 71</b>  |
| <b>C19ORF73</b>  | <b>chromosome 19 open reading frame 73</b>  |
| <b>C1D</b>       | <b>C1D nuclear receptor corepressor</b>     |
| <b>C1GALT1C1</b> | <b>C1GALT1-specific chaperone 1</b>         |
| <b>C1ORF101</b>  | <b>chromosome 1 open reading frame 101</b>  |
| <b>C1ORF112</b>  | <b>chromosome 1 open reading frame 112</b>  |
| <b>C1ORF123</b>  | <b>chromosome 1 open reading frame 123</b>  |
| <b>C1ORF131</b>  | <b>chromosome 1 open reading frame 131</b>  |
| <b>C1ORF186</b>  | <b>chromosome 1 open reading frame 186</b>  |
| <b>C1ORF216</b>  | <b>chromosome 1 open reading frame 216</b>  |
| <b>C1ORF27</b>   | <b>chromosome 1 open reading frame 27</b>   |
| <b>C1ORF35</b>   | <b>chromosome 1 open reading frame 35</b>   |
| <b>C1ORF43</b>   | <b>chromosome 1 open reading frame 43</b>   |
| <b>C1ORF50</b>   | <b>chromosome 1 open reading frame 50</b>   |
| <b>C1ORF52</b>   | <b>chromosome 1 open reading frame 52</b>   |
| <b>C1ORF56</b>   | <b>chromosome 1 open reading frame 56</b>   |

|              |                                                        |
|--------------|--------------------------------------------------------|
| C1ORF74      | chromosome 1 open reading frame 74                     |
| C1QBP        | complement component 1, q subcomponent binding protein |
| C1R          | complement component 1, r subcomponent                 |
| C1RL         | complement component 1, r subcomponent-like            |
| C1RL-AS1     | C1RL antisense RNA 1                                   |
| C20ORF144    | chromosome 20 open reading frame 144                   |
| C20ORF195    | chromosome 20 open reading frame 195                   |
| C20ORF24     | chromosome 20 open reading frame 24                    |
| C21ORF2      | chromosome 21 open reading frame 2                     |
| C21ORF33     | chromosome 21 open reading frame 33                    |
| C21ORF58     | chromosome 21 open reading frame 58                    |
| C21ORF59     | chromosome 21 open reading frame 59                    |
| C21ORF62-AS1 | C21orf62 antisense RNA 1                               |
| C21ORF91     | chromosome 21 open reading frame 91                    |
| C22ORF23     | chromosome 22 open reading frame 23                    |
| C22ORF29     | chromosome 22 open reading frame 29                    |
| C22ORF39     | chromosome 22 open reading frame 39                    |
| C22ORF46     | chromosome 22 open reading frame 46                    |
| C2CD2        | C2 calcium-dependent domain containing 2               |
| C2CD3        | C2 calcium-dependent domain containing 3               |
| C2CD5        | C2 calcium-dependent domain containing 5               |
| C2ORF15      | chromosome 2 open reading frame 15                     |
| C2ORF42      | chromosome 2 open reading frame 42                     |
| C2ORF47      | chromosome 2 open reading frame 47                     |
| C2ORF54      | chromosome 2 open reading frame 54                     |
| C2ORF61      | chromosome 2 open reading frame 61                     |
| C2ORF68      | chromosome 2 open reading frame 68                     |
| C2ORF69      | chromosome 2 open reading frame 69                     |
| C2ORF70      | chromosome 2 open reading frame 70                     |
| C2ORF74      | chromosome 2 open reading frame 74                     |
| C2ORF76      | chromosome 2 open reading frame 76                     |
| C3ORF17      | chromosome 3 open reading frame 17                     |
| C3ORF18      | chromosome 3 open reading frame 18                     |
| C3ORF22      | chromosome 3 open reading frame 22                     |
| C3ORF38      | chromosome 3 open reading frame 38                     |
| C3ORF58      | chromosome 3 open reading frame 58                     |
| C3ORF62      | chromosome 3 open reading frame 62                     |
| C4ORF29      | chromosome 4 open reading frame 29                     |
| C4ORF46      | chromosome 4 open reading frame 46                     |
| C5ORF15      | chromosome 5 open reading frame 15                     |
| C5ORF22      | chromosome 5 open reading frame 22                     |

|              |                                           |
|--------------|-------------------------------------------|
| C5ORF24      | chromosome 5 open reading frame 24        |
| C5ORF28      | chromosome 5 open reading frame 28        |
| C5ORF30      | chromosome 5 open reading frame 30        |
| C5ORF34      | chromosome 5 open reading frame 34        |
| C5ORF45      | chromosome 5 open reading frame 45        |
| C5ORF51      | chromosome 5 open reading frame 51        |
| C5ORF63      | chromosome 5 open reading frame 63        |
| C6ORF1       | chromosome 6 open reading frame 1         |
| C6ORF120     | chromosome 6 open reading frame 120       |
| C6ORF226     | chromosome 6 open reading frame 226       |
| C6ORF48      | chromosome 6 open reading frame 48        |
| C6ORF52      | chromosome 6 open reading frame 52        |
| C6ORF62      | chromosome 6 open reading frame 62        |
| C7ORF13      | chromosome 7 open reading frame 13        |
| C7ORF25      | chromosome 7 open reading frame 25        |
| C7ORF26      | chromosome 7 open reading frame 26        |
| C7ORF43      | chromosome 7 open reading frame 43        |
| C7ORF49      | chromosome 7 open reading frame 49        |
| C7ORF50      | chromosome 7 open reading frame 50        |
| C7ORF55      | chromosome 7 open reading frame 55        |
| C7ORF71      | chromosome 7 open reading frame 71        |
| C7ORF73      | chromosome 7 open reading frame 73        |
| C8G          | complement component 8, gamma polypeptide |
| C8ORF33      | chromosome 8 open reading frame 33        |
| C8ORF37      | chromosome 8 open reading frame 37        |
| C8ORF44      | chromosome 8 open reading frame 44        |
| C8ORF44-SGK3 | C8orf44-SGK3 readthrough                  |
| C8ORF59      | chromosome 8 open reading frame 59        |
| C8ORF76      | chromosome 8 open reading frame 76        |
| C8ORF82      | chromosome 8 open reading frame 82        |
| C8ORF86      | chromosome 8 open reading frame 86        |
| C9ORF114     | chromosome 9 open reading frame 114       |
| C9ORF156     | chromosome 9 open reading frame 156       |
| C9ORF16      | chromosome 9 open reading frame 16        |
| C9ORF163     | chromosome 9 open reading frame 163       |
| C9ORF172     | chromosome 9 open reading frame 172       |
| C9ORF3       | chromosome 9 open reading frame 3         |
| C9ORF41      | chromosome 9 open reading frame 41        |
| C9ORF43      | chromosome 9 open reading frame 43        |
| C9ORF69      | chromosome 9 open reading frame 69        |
| C9ORF72      | chromosome 9 open reading frame 72        |

|          |                                                                                  |
|----------|----------------------------------------------------------------------------------|
| C9ORF85  | chromosome 9 open reading frame 85                                               |
| C9ORF89  | chromosome 9 open reading frame 89                                               |
| C9ORF91  | chromosome 9 open reading frame 91                                               |
| CA5BP1   | carbonic anhydrase VB pseudogene 1                                               |
| CAAP1    | caspase activity and apoptosis inhibitor 1                                       |
| CAB39    | calcium binding protein 39                                                       |
| CAB39L   | calcium binding protein 39-like                                                  |
| CABIN1   | calcineurin binding protein 1                                                    |
| CABYR    | calcium binding tyrosine-(Y)-phosphorylation regulated                           |
| CACNA1E  | calcium channel, voltage-dependent, R type, alpha 1E subunit                     |
| CACNB3   | calcium channel, voltage-dependent, beta 3 subunit                               |
| CACTIN   | cactin, spliceosome C complex subunit                                            |
| CACUL1   | CDK2-associated, cullin domain 1                                                 |
| CACYBP   | calcyclin binding protein                                                        |
| CAD      | carbamoyl-phosphate synthetase 2, aspartate transcarbamylase, and dihydroorotase |
| CAGE1    | cancer antigen 1                                                                 |
| CAHM     | colon adenocarcinoma hypermethylated (non-protein coding)                        |
| CALCOCO1 | calcium binding and coiled-coil domain 1                                         |
| CALCOCO2 | calcium binding and coiled-coil domain 2                                         |
| CALHM2   | calcium homeostasis modulator 2                                                  |
| CALM1    | calmodulin 1 (phosphorylase kinase, delta)                                       |
| CALM2    | calmodulin 2 (phosphorylase kinase, delta)                                       |
| CALM3    | calmodulin 3 (phosphorylase kinase, delta)                                       |
| CALN1    | calneuron 1                                                                      |
| CALR     | calreticulin                                                                     |
| CAMK1    | calcium/calmodulin-dependent protein kinase I                                    |
| CAMK2D   | calcium/calmodulin-dependent protein kinase II delta                             |
| CAMP     | cathelicidin antimicrobial peptide                                               |
| CAMSAP2  | calmodulin regulated spectrin-associated protein family, member 2                |
| CAMTA2   | calmodulin binding transcription activator 2                                     |
| CAND1    | cullin-associated and neddylation-dissociated 1                                  |
| CANX     | calnexin                                                                         |
| CAP1     | CAP, adenylate cyclase-associated protein 1 (yeast)                              |
| CAPN10   | calpain 10                                                                       |
| CAPN15   | calpain 15                                                                       |
| CAPNS1   | calpain, small subunit 1                                                         |
| CAPRIN1  | cell cycle associated protein 1                                                  |
| CAPS2    | calcyphosine 2                                                                   |
| CAPZA1   | capping protein (actin filament) muscle Z-line, alpha 1                          |
| CARD11   | caspase recruitment domain family, member 11                                     |
| CARD8    | caspase recruitment domain family, member 8                                      |

|          |                                                                       |
|----------|-----------------------------------------------------------------------|
| CARM1    | coactivator-associated arginine methyltransferase 1                   |
| CASC1    | cancer susceptibility candidate 1                                     |
| CASC3    | cancer susceptibility candidate 3                                     |
| CASC5    | cancer susceptibility candidate 5                                     |
| CASD1    | CAS1 domain containing 1                                              |
| CASP10   | caspase 10, apoptosis-related cysteine peptidase                      |
| CASP3    | caspase 3, apoptosis-related cysteine peptidase                       |
| CASP6    | caspase 6, apoptosis-related cysteine peptidase                       |
| CATSPERD | catsper channel auxiliary subunit delta                               |
| CBFA2T3  | core-binding factor, runt domain, alpha subunit 2; translocated to, 3 |
| CBFB     | core-binding factor, beta subunit                                     |
| CBLB     | Cbl proto-oncogene B, E3 ubiquitin protein ligase                     |
| CBLL1    | Cbl proto-oncogene-like 1, E3 ubiquitin protein ligase                |
| CBLN3    | cerebellin 3 precursor                                                |
| CBR4     | carbonyl reductase 4                                                  |
| CBX1     | chromobox homolog 1                                                   |
| CBX3     | chromobox homolog 3                                                   |
| CBX3P2   | chromobox homolog 3 pseudogene 2                                      |
| CBX5     | chromobox homolog 5                                                   |
| CBX6     | chromobox homolog 6                                                   |
| CBX7     | chromobox homolog 7                                                   |
| CBY3     | chibby homolog 3 (Drosophila)                                         |
| CC2D1B   | coiled-coil and C2 domain containing 1B                               |
| CCAR1    | cell division cycle and apoptosis regulator 1                         |
| CCAR2    | cell cycle and apoptosis regulator 2                                  |
| CCBL2    | cysteine conjugate-beta lyase 2                                       |
| CCDC101  | coiled-coil domain containing 101                                     |
| CCDC102A | coiled-coil domain containing 102A                                    |
| CCDC102B | coiled-coil domain containing 102B                                    |
| CCDC103  | coiled-coil domain containing 103                                     |
| CCDC107  | coiled-coil domain containing 107                                     |
| CCDC109B | coiled-coil domain containing 109B                                    |
| CCDC110  | coiled-coil domain containing 110                                     |
| CCDC113  | coiled-coil domain containing 113                                     |
| CCDC115  | coiled-coil domain containing 115                                     |
| CCDC12   | coiled-coil domain containing 12                                      |
| CCDC121  | coiled-coil domain containing 121                                     |
| CCDC124  | coiled-coil domain containing 124                                     |
| CCDC13   | coiled-coil domain containing 13                                      |
| CCDC130  | coiled-coil domain containing 130                                     |
| CCDC134  | coiled-coil domain containing 134                                     |

|          |                                                 |
|----------|-------------------------------------------------|
| CCDC137  | coiled-coil domain containing 137               |
| CCDC138  | coiled-coil domain containing 138               |
| CCDC142  | coiled-coil domain containing 142               |
| CCDC144B | coiled-coil domain containing 144B (pseudogene) |
| CCDC146  | coiled-coil domain containing 146               |
| CCDC151  | coiled-coil domain containing 151               |
| CCDC157  | coiled-coil domain containing 157               |
| CCDC171  | coiled-coil domain containing 171               |
| CCDC174  | coiled-coil domain containing 174               |
| CCDC18   | coiled-coil domain containing 18                |
| CCDC24   | coiled-coil domain containing 24                |
| CCDC25   | coiled-coil domain containing 25                |
| CCDC28A  | coiled-coil domain containing 28A               |
| CCDC28B  | coiled-coil domain containing 28B               |
| CCDC43   | coiled-coil domain containing 43                |
| CCDC47   | coiled-coil domain containing 47                |
| CCDC50   | coiled-coil domain containing 50                |
| CCDC51   | coiled-coil domain containing 51                |
| CCDC53   | coiled-coil domain containing 53                |
| CCDC57   | coiled-coil domain containing 57                |
| CCDC58   | coiled-coil domain containing 58                |
| CCDC59   | coiled-coil domain containing 59                |
| CCDC6    | coiled-coil domain containing 6                 |
| CCDC62   | coiled-coil domain containing 62                |
| CCDC66   | coiled-coil domain containing 66                |
| CCDC69   | coiled-coil domain containing 69                |
| CCDC7    | coiled-coil domain containing 7                 |
| CCDC77   | coiled-coil domain containing 77                |
| CCDC78   | coiled-coil domain containing 78                |
| CCDC85B  | coiled-coil domain containing 85B               |
| CCDC86   | coiled-coil domain containing 86                |
| CCDC88A  | coiled-coil domain containing 88A               |
| CCDC88B  | coiled-coil domain containing 88B               |
| CCDC88C  | coiled-coil domain containing 88C               |
| CCDC9    | coiled-coil domain containing 9                 |
| CCDC90B  | coiled-coil domain containing 90B               |
| CCDC94   | coiled-coil domain containing 94                |
| CCDC97   | coiled-coil domain containing 97                |
| CCL15    | chemokine (C-C motif) ligand 15                 |
| CCL22    | chemokine (C-C motif) ligand 22                 |
| CCL3     | chemokine (C-C motif) ligand 3                  |



|          |                                                                   |
|----------|-------------------------------------------------------------------|
| CCL5     | chemokine (C-C motif) ligand 5                                    |
| CCM2     | cerebral cavernous malformation 2                                 |
| CCNB1IP1 | cyclin B1 interacting protein 1, E3 ubiquitin protein ligase      |
| CCNC     | cyclin C                                                          |
| CCND2    | cyclin D2                                                         |
| CCND3    | cyclin D3                                                         |
| CCNDBP1  | cyclin D-type binding-protein 1                                   |
| CCNG2    | cyclin G2                                                         |
| CCNH     | cyclin H                                                          |
| CCNI     | cyclin I                                                          |
| CCNJ     | cyclin J                                                          |
| CCNL1    | cyclin L1                                                         |
| CCNL2    | cyclin L2                                                         |
| CCNT1    | cyclin T1                                                         |
| CCNT2    | cyclin T2                                                         |
| CCNYL1   | cyclin Y-like 1                                                   |
| CCR1     | chemokine (C-C motif) receptor 1                                  |
| CCR5     | chemokine (C-C motif) receptor 5 (gene/pseudogene)                |
| CCR6     | chemokine (C-C motif) receptor 6                                  |
| CCR7     | chemokine (C-C motif) receptor 7                                  |
| CCR8     | chemokine (C-C motif) receptor 8                                  |
| CCR9     | chemokine (C-C motif) receptor 9                                  |
| CCRN4L   | CCR4 carbon catabolite repression 4-like ( <i>S. cerevisiae</i> ) |
| CCT2     | chaperonin containing TCP1, subunit 2 (beta)                      |
| CCT3     | chaperonin containing TCP1, subunit 3 (gamma)                     |
| CCT4     | chaperonin containing TCP1, subunit 4 (delta)                     |
| CCT5     | chaperonin containing TCP1, subunit 5 (epsilon)                   |
| CCT6A    | chaperonin containing TCP1, subunit 6A (zeta 1)                   |
| CCT6B    | chaperonin containing TCP1, subunit 6B (zeta 2)                   |
| CCT7     | chaperonin containing TCP1, subunit 7 (eta)                       |
| CCT8     | chaperonin containing TCP1, subunit 8 (theta)                     |
| CD101    | CD101 molecule                                                    |
| CD164    | CD164 molecule, sialomucin                                        |
| CD200R1  | CD200 receptor 1                                                  |
| CD22     | CD22 molecule                                                     |
| CD226    | CD226 molecule                                                    |
| CD27     | CD27 molecule                                                     |
| CD274    | CD274 molecule                                                    |
| CD28     | CD28 molecule                                                     |
| CD2AP    | CD2-associated protein                                            |
| CD2BP2   | CD2 (cytoplasmic tail) binding protein 2                          |

|          |                                                                              |
|----------|------------------------------------------------------------------------------|
| CD300A   | CD300a molecule                                                              |
| CD300C   | CD300c molecule                                                              |
| CD320    | CD320 molecule                                                               |
| CD37     | CD37 molecule                                                                |
| CD38     | CD38 molecule                                                                |
| CD40     | CD40 molecule, TNF receptor superfamily member 5                             |
| CD46     | CD46 molecule, complement regulatory protein                                 |
| CD47     | CD47 molecule                                                                |
| CD48     | CD48 molecule                                                                |
| CD53     | CD53 molecule                                                                |
| CD55     | CD55 molecule, decay accelerating factor for complement (Cromer blood group) |
| CD58     | CD58 molecule                                                                |
| CD59     | CD59 molecule, complement regulatory protein                                 |
| CD5L     | CD5 molecule-like                                                            |
| CD63     | CD63 molecule                                                                |
| CD68     | CD68 molecule                                                                |
| CD69     | CD69 molecule                                                                |
| CD70     | CD70 molecule                                                                |
| CD72     | CD72 molecule                                                                |
| CD74     | CD74 molecule, major histocompatibility complex, class II invariant chain    |
| CD79A    | CD79a molecule, immunoglobulin-associated alpha                              |
| CD80     | CD80 molecule                                                                |
| CD83     | CD83 molecule                                                                |
| CDC123   | cell division cycle 123                                                      |
| CDC14A   | cell division cycle 14A                                                      |
| CDC20    | cell division cycle 20                                                       |
| CDC26    | cell division cycle 26                                                       |
| CDC27    | cell division cycle 27                                                       |
| CDC37    | cell division cycle 37                                                       |
| CDC37L1  | cell division cycle 37-like 1                                                |
| CDC42    | cell division cycle 42                                                       |
| CDC42BPG | CDC42 binding protein kinase gamma (DMPK-like)                               |
| CDC42EP3 | CDC42 effector protein (Rho GTPase binding) 3                                |
| CDC42SE1 | CDC42 small effector 1                                                       |
| CDC42SE2 | CDC42 small effector 2                                                       |
| CDC5L    | cell division cycle 5-like                                                   |
| CDC6     | cell division cycle 6                                                        |
| CDC7     | cell division cycle 7                                                        |
| CDC73    | cell division cycle 73                                                       |
| CDCA2    | cell division cycle associated 2                                             |
| CDCA3    | cell division cycle associated 3                                             |

|            |                                                                  |
|------------|------------------------------------------------------------------|
| CDCA4      | cell division cycle associated 4                                 |
| CDCA5      | cell division cycle associated 5                                 |
| CDH17      | cadherin 17, LI cadherin (liver-intestine)                       |
| CDH24      | cadherin 24, type 2                                              |
| CDIP1      | cell death-inducing p53 target 1                                 |
| CDIPT      | CDP-diacylglycerol--inositol 3-phosphatidyltransferase           |
| CDK10      | cyclin-dependent kinase 10                                       |
| CDK11A     | cyclin-dependent kinase 11A                                      |
| CDK11B     | cyclin-dependent kinase 11B                                      |
| CDK12      | cyclin-dependent kinase 12                                       |
| CDK13      | cyclin-dependent kinase 13                                       |
| CDK14      | cyclin-dependent kinase 14                                       |
| CDK16      | cyclin-dependent kinase 16                                       |
| CDK17      | cyclin-dependent kinase 17                                       |
| CDK19      | cyclin-dependent kinase 19                                       |
| CDK2AP1    | cyclin-dependent kinase 2 associated protein 1                   |
| CDK4       | cyclin-dependent kinase 4                                        |
| CDK5RAP1   | CDK5 regulatory subunit associated protein 1                     |
| CDK5RAP3   | CDK5 regulatory subunit associated protein 3                     |
| CDK6       | cyclin-dependent kinase 6                                        |
| CDK7       | cyclin-dependent kinase 7                                        |
| CDK9       | cyclin-dependent kinase 9                                        |
| CDKAL1     | CDK5 regulatory subunit associated protein 1-like 1              |
| CDKL3      | cyclin-dependent kinase-like 3                                   |
| CDKN1B     | cyclin-dependent kinase inhibitor 1B (p27, Kip1)                 |
| CDKN2AIP   | CDKN2A interacting protein                                       |
| CDKN2AIPNL | CDKN2A interacting protein N-terminal like                       |
| CDKN2C     | cyclin-dependent kinase inhibitor 2C (p18, inhibits CDK4)        |
| CDR2       | cerebellar degeneration-related protein 2, 62kDa                 |
| CDS2       | CDP-diacylglycerol synthase (phosphatidate cytidyltransferase) 2 |
| CDV3       | CDV3 homolog (mouse)                                             |
| CEBPZ      | CCAAT/enhancer binding protein (C/EBP), zeta                     |
| CELF1      | CUGBP, Elav-like family member 1                                 |
| CELSR3     | cadherin, EGF LAG seven-pass G-type receptor 3                   |
| CEMP1      | cementum protein 1                                               |
| CEND1      | cell cycle exit and neuronal differentiation 1                   |
| CENPA      | centromere protein A                                             |
| CENPBD1    | CENPB DNA-binding domains containing 1                           |
| CENPH      | centromere protein H                                             |
| CENPJ      | centromere protein J                                             |
| CENPL      | centromere protein L                                             |

|           |                                             |
|-----------|---------------------------------------------|
| CENPN     | centromere protein N                        |
| CENPO     | centromere protein O                        |
| CENPP     | centromere protein P                        |
| CENPQ     | centromere protein Q                        |
| CENPT     | centromere protein T                        |
| CENPU     | centromere protein U                        |
| CENPW     | centromere protein W                        |
| CEP120    | centrosomal protein 120kDa                  |
| CEP135    | centrosomal protein 135kDa                  |
| CEP170    | centrosomal protein 170kDa                  |
| CEP19     | centrosomal protein 19kDa                   |
| CEP192    | centrosomal protein 192kDa                  |
| CEP250    | centrosomal protein 250kDa                  |
| CEP350    | centrosomal protein 350kDa                  |
| CEP44     | centrosomal protein 44kDa                   |
| CEP57     | centrosomal protein 57kDa                   |
| CEP57L1   | centrosomal protein 57kDa-like 1            |
| CEP63     | centrosomal protein 63kDa                   |
| CEP68     | centrosomal protein 68kDa                   |
| CEP72     | centrosomal protein 72kDa                   |
| CEP76     | centrosomal protein 76kDa                   |
| CEP83     | centrosomal protein 83kDa                   |
| CEP95     | centrosomal protein 95kDa                   |
| CEPT1     | choline/ethanolamine phosphotransferase 1   |
| CERCAM    | cerebral endothelial cell adhesion molecule |
| CERS6     | ceramide synthase 6                         |
| CES2      | carboxylesterase 2                          |
| CETN3     | centrin, EF-hand protein, 3                 |
| CFAP36    | cilia and flagella associated protein 36    |
| CFAP43    | cilia and flagella associated protein 43    |
| CFAP53    | cilia and flagella associated protein 53    |
| CFAP57    | cilia and flagella associated protein 57    |
| CFAP69    | cilia and flagella associated protein 69    |
| CFAP70    | cilia and flagella associated protein 70    |
| CFAP97    | cilia and flagella associated protein 97    |
| CFDP1     | craniofacial development protein 1          |
| CFL1      | cofilin 1 (non-muscle)                      |
| CFL1P1    | cofilin 1 (non-muscle) pseudogene 1         |
| CFL2      | cofilin 2 (muscle)                          |
| CFLAR     | CASP8 and FADD-like apoptosis regulator     |
| CFLAR-AS1 | CFLAR antisense RNA 1                       |

|             |                                                                         |
|-------------|-------------------------------------------------------------------------|
| CFP         | complement factor properdin                                             |
| CGGBP1      | CGG triplet repeat binding protein 1                                    |
| CGREF1      | cell growth regulator with EF-hand domain 1                             |
| CHAC2       | ChaC, cation transport regulator homolog 2 (E. coli)                    |
| CHAF1A      | chromatin assembly factor 1, subunit A (p150)                           |
| CHAMP1      | chromosome alignment maintaining phosphoprotein 1                       |
| CHCHD1      | coiled-coil-helix-coiled-coil-helix domain containing 1                 |
| CHCHD2      | coiled-coil-helix-coiled-coil-helix domain containing 2                 |
| CHCHD4      | coiled-coil-helix-coiled-coil-helix domain containing 4                 |
| CHCHD5      | coiled-coil-helix-coiled-coil-helix domain containing 5                 |
| CHCHD6      | coiled-coil-helix-coiled-coil-helix domain containing 6                 |
| CHCHD7      | coiled-coil-helix-coiled-coil-helix domain containing 7                 |
| CHD1        | chromodomain helicase DNA binding protein 1                             |
| CHD1L       | chromodomain helicase DNA binding protein 1-like                        |
| CHD2        | chromodomain helicase DNA binding protein 2                             |
| CHD8        | chromodomain helicase DNA binding protein 8                             |
| CHD9        | chromodomain helicase DNA binding protein 9                             |
| CHEK1       | checkpoint kinase 1                                                     |
| CHERP       | calcium homeostasis endoplasmic reticulum protein                       |
| CHMP1A      | charged multivesicular body protein 1A                                  |
| CHMP1B      | charged multivesicular body protein 1B                                  |
| CHMP2A      | charged multivesicular body protein 2A                                  |
| CHMP3       | charged multivesicular body protein 3                                   |
| CHMP4A      | charged multivesicular body protein 4A                                  |
| CHMP6       | charged multivesicular body protein 6                                   |
| CHORDC1     | cysteine and histidine-rich domain (CHORD) containing 1                 |
| CHP1        | calcineurin-like EF-hand protein 1                                      |
| CHPF2       | chondroitin polymerizing factor 2                                       |
| CHRAC1      | chromatin accessibility complex 1                                       |
| CHRNA6      | cholinergic receptor, nicotinic, alpha 6 (neuronal)                     |
| CHST11      | carbohydrate (chondroitin 4) sulfotransferase 11                        |
| CHST12      | carbohydrate (chondroitin 4) sulfotransferase 12                        |
| CHST14      | carbohydrate (N-acetylgalactosamine 4-O) sulfotransferase 14            |
| CHST2       | carbohydrate (N-acetylglucosamine-6-O) sulfotransferase 2               |
| CTF8        | CTF8, chromosome transmission fidelity factor 8 homolog (S. cerevisiae) |
| CHTOP       | chromatin target of PRMT1                                               |
| CHUK        | conserved helix-loop-helix ubiquitous kinase                            |
| CHURC1      | churchill domain containing 1                                           |
| CHURC1-FNTB | CHURC1-FNTB readthrough                                                 |
| CIAO1       | cytosolic iron-sulfur assembly component 1                              |
| CIAPIN1     | cytokine induced apoptosis inhibitor 1                                  |

|            |                                                                                   |
|------------|-----------------------------------------------------------------------------------|
| CIC        | capicua transcriptional repressor                                                 |
| CIDEB      | cell death-inducing DFFA-like effector b                                          |
| CIDPCP     | cell death-inducing DFFA-like effector c pseudogene                               |
| CIITA      | class II, major histocompatibility complex, transactivator                        |
| CIPC       | CLOCK-interacting pacemaker                                                       |
| CIRBP      | cold inducible RNA binding protein                                                |
| CIRBP-AS1  | CIRBP antisense RNA 1                                                             |
| CIRH1A     | cirrhosis, autosomal recessive 1A (cirhin)                                        |
| CISD1      | CDGSH iron sulfur domain 1                                                        |
| CISD2      | CDGSH iron sulfur domain 2                                                        |
| CISD3      | CDGSH iron sulfur domain 3                                                        |
| CITED2     | Cbp/p300-interacting transactivator, with Glu/Asp-rich carboxy-terminal domain, 2 |
| CKAP2      | cytoskeleton associated protein 2                                                 |
| CKLF       | chemokine-like factor                                                             |
| CKLF-CMTM1 | CKLF-CMTM1 readthrough                                                            |
| CKS1B      | CDC28 protein kinase regulatory subunit 1B                                        |
| CKS2       | CDC28 protein kinase regulatory subunit 2                                         |
| CLASP1     | cytoplasmic linker associated protein 1                                           |
| CLASP2     | cytoplasmic linker associated protein 2                                           |
| CLASRP     | CLK4-associating serine/arginine rich protein                                     |
| CLCC1      | chloride channel CLIC-like 1                                                      |
| CLCN2      | chloride channel, voltage-sensitive 2                                             |
| CLCN3      | chloride channel, voltage-sensitive 3                                             |
| CLDN1      | claudin 1                                                                         |
| CLDN12     | claudin 12                                                                        |
| CLDND1     | claudin domain containing 1                                                       |
| CLDND2     | claudin domain containing 2                                                       |
| CLEC16A    | C-type lectin domain family 16, member A                                          |
| CLEC17A    | C-type lectin domain family 17, member A                                          |
| CLEC2D     | C-type lectin domain family 2, member D                                           |
| CLEC7A     | C-type lectin domain family 7, member A                                           |
| CLECL1     | C-type lectin-like 1                                                              |
| CLHC1      | clathrin heavy chain linker domain containing 1                                   |
| CLIC4      | chloride intracellular channel 4                                                  |
| CLIP2      | CAP-GLY domain containing linker protein 2                                        |
| CLIP4      | CAP-GLY domain containing linker protein family, member 4                         |
| CLK1       | CDC-like kinase 1                                                                 |
| CLK2       | CDC-like kinase 2                                                                 |
| CLN3       | ceroid-lipofuscinosis, neuronal 3                                                 |
| CLN5       | ceroid-lipofuscinosis, neuronal 5                                                 |
| CLNS1A     | chloride channel, nucleotide-sensitive, 1A                                        |

|               |                                                                             |
|---------------|-----------------------------------------------------------------------------|
| <b>CLOCK</b>  | <b>clock circadian regulator</b>                                            |
| <b>CLP1</b>   | <b>cleavage and polyadenylation factor I subunit 1</b>                      |
| <b>CLPB</b>   | <b>ClpB homolog, mitochondrial AAA ATPase chaperonin</b>                    |
| <b>CLPTM1</b> | <b>cleft lip and palate associated transmembrane protein 1</b>              |
| <b>CLSTN3</b> | <b>calsyntenin 3</b>                                                        |
| <b>CLTC</b>   | <b>clathrin, heavy chain (Hc)</b>                                           |
| <b>CLUAP1</b> | <b>clusterin associated protein 1</b>                                       |
| <b>CLUH</b>   | <b>clustered mitochondria (cluA/CLU1) homolog</b>                           |
| <b>CMAHP</b>  | <b>cytidine monophospho-N-acetylneuraminic acid hydroxylase, pseudogene</b> |
| <b>CMC1</b>   | <b>C-x(9)-C motif containing 1</b>                                          |
| <b>CMC2</b>   | <b>C-x(9)-C motif containing 2</b>                                          |
| <b>CMPK1</b>  | <b>cytidine monophosphate (UMP-CMP) kinase 1, cytosolic</b>                 |
| <b>CMTR1</b>  | <b>cap methyltransferase 1</b>                                              |
| <b>CNBP</b>   | <b>CCHC-type zinc finger, nucleic acid binding protein</b>                  |
| <b>CNIH1</b>  | <b>cornichon family AMPA receptor auxiliary protein 1</b>                   |
| <b>CNIH2</b>  | <b>cornichon family AMPA receptor auxiliary protein 2</b>                   |
| <b>CNIH4</b>  | <b>cornichon family AMPA receptor auxiliary protein 4</b>                   |
| <b>CNN2</b>   | <b>calponin 2</b>                                                           |
| <b>CNNM2</b>  | <b>cyclin and CBS domain divalent metal cation transport mediator 2</b>     |
| <b>CNOT1</b>  | <b>CCR4-NOT transcription complex, subunit 1</b>                            |
| <b>CNOT10</b> | <b>CCR4-NOT transcription complex, subunit 10</b>                           |
| <b>CNOT4</b>  | <b>CCR4-NOT transcription complex, subunit 4</b>                            |
| <b>CNOT6</b>  | <b>CCR4-NOT transcription complex, subunit 6</b>                            |
| <b>CNOT7</b>  | <b>CCR4-NOT transcription complex, subunit 7</b>                            |
| <b>CNOT8</b>  | <b>CCR4-NOT transcription complex, subunit 8</b>                            |
| <b>CNP</b>    | <b>2',3'-cyclic nucleotide 3' phosphodiesterase</b>                         |
| <b>CNPPD1</b> | <b>cyclin Pas1/PHO80 domain containing 1</b>                                |
| <b>CNPY2</b>  | <b>canopy FGF signaling regulator 2</b>                                     |
| <b>CNPY3</b>  | <b>canopy FGF signaling regulator 3</b>                                     |
| <b>CNPY4</b>  | <b>canopy FGF signaling regulator 4</b>                                     |
| <b>CNR1</b>   | <b>cannabinoid receptor 1 (brain)</b>                                       |
| <b>CNR2</b>   | <b>cannabinoid receptor 2 (macrophage)</b>                                  |
| <b>CNST</b>   | <b>consortin, connexin sorting protein</b>                                  |
| <b>CNTD2</b>  | <b>cyclin N-terminal domain containing 2</b>                                |
| <b>COA1</b>   | <b>cytochrome c oxidase assembly factor 1 homolog (S. cerevisiae)</b>       |
| <b>COA4</b>   | <b>cytochrome c oxidase assembly factor 4 homolog (S. cerevisiae)</b>       |
| <b>COA5</b>   | <b>cytochrome c oxidase assembly factor 5</b>                               |
| <b>COA6</b>   | <b>cytochrome c oxidase assembly factor 6</b>                               |
| <b>COASY</b>  | <b>CoA synthase</b>                                                         |
| <b>COG2</b>   | <b>component of oligomeric golgi complex 2</b>                              |
| <b>COG3</b>   | <b>component of oligomeric golgi complex 3</b>                              |

|            |                                                  |
|------------|--------------------------------------------------|
| COG4       | component of oligomeric golgi complex 4          |
| COG8       | component of oligomeric golgi complex 8          |
| COIL       | coilin                                           |
| COL19A1    | collagen, type XIX, alpha 1                      |
| COL20A1    | collagen, type XX, alpha 1                       |
| COL5A3     | collagen, type V, alpha 3                        |
| COL9A2     | collagen, type IX, alpha 2                       |
| COL9A3     | collagen, type IX, alpha 3                       |
| COLEC11    | collectin sub-family member 11                   |
| COLGALT1   | collagen beta(1-O)galactosyltransferase 1        |
| COMM10     | COMM domain containing 10                        |
| COMM2      | COMM domain containing 2                         |
| COMM3      | COMM domain containing 3                         |
| COMM3-BMI1 | COMM3-BMI1 readthrough                           |
| COMM4      | COMM domain containing 4                         |
| COMM5      | COMM domain containing 5                         |
| COMM6      | COMM domain containing 6                         |
| COMTD1     | catechol-O-methyltransferase domain containing 1 |
| COPA       | coatamer protein complex, subunit alpha          |
| COPB1      | coatamer protein complex, subunit beta 1         |
| COPE       | coatamer protein complex, subunit epsilon        |
| COPG1      | coatamer protein complex, subunit gamma 1        |
| COPS2      | COP9 signalosome subunit 2                       |
| COPS3      | COP9 signalosome subunit 3                       |
| COPS4      | COP9 signalosome subunit 4                       |
| COPS5      | COP9 signalosome subunit 5                       |
| COPS6      | COP9 signalosome subunit 6                       |
| COPS7A     | COP9 signalosome subunit 7A                      |
| COPS7B     | COP9 signalosome subunit 7B                      |
| COPS8      | COP9 signalosome subunit 8                       |
| COPZ1      | coatamer protein complex, subunit zeta 1         |
| COQ10A     | coenzyme Q10 homolog A ( <i>S. cerevisiae</i> )  |
| COQ10B     | coenzyme Q10 homolog B ( <i>S. cerevisiae</i> )  |
| COQ3       | coenzyme Q3 methyltransferase                    |
| COQ4       | coenzyme Q4                                      |
| COQ6       | coenzyme Q6 monooxygenase                        |
| COQ9       | coenzyme Q9                                      |
| CORIN      | corin, serine peptidase                          |
| CORO1A     | coronin, actin binding protein, 1A               |
| CORO1B     | coronin, actin binding protein, 1B               |
| CORO1C     | coronin, actin binding protein, 1C               |



|             |                                                                      |
|-------------|----------------------------------------------------------------------|
| CORO7       | coronin 7                                                            |
| CORO7-PAM16 | CORO7-PAM16 readthrough                                              |
| COX11       | COX11 cytochrome c oxidase copper chaperone                          |
| COX14       | COX14 cytochrome c oxidase assembly factor                           |
| COX15       | cytochrome c oxidase assembly homolog 15 (yeast)                     |
| COX16       | COX16 cytochrome c oxidase assembly homolog ( <i>S. cerevisiae</i> ) |
| COX17       | COX17 cytochrome c oxidase copper chaperone                          |
| COX18       | COX18 cytochrome c oxidase assembly factor                           |
| COX19       | COX19 cytochrome c oxidase assembly factor                           |
| COX20       | COX20 cytochrome c oxidase assembly factor                           |
| COX5A       | cytochrome c oxidase subunit Va                                      |
| COX5B       | cytochrome c oxidase subunit Vb                                      |
| COX6C       | cytochrome c oxidase subunit VIc                                     |
| COX7A2      | cytochrome c oxidase subunit VIIa polypeptide 2 (liver)              |
| COX7A2L     | cytochrome c oxidase subunit VIIa polypeptide 2 like                 |
| COX7B       | cytochrome c oxidase subunit VIIb                                    |
| COX7C       | cytochrome c oxidase subunit VIIc                                    |
| COX8A       | cytochrome c oxidase subunit VIIIA (ubiquitous)                      |
| CPEB2       | cytoplasmic polyadenylation element binding protein 2                |
| CPEB4       | cytoplasmic polyadenylation element binding protein 4                |
| CPNE1       | copine I                                                             |
| CPNE6       | copine VI (neuronal)                                                 |
| CPNE8       | copine VIII                                                          |
| CPOX        | coproporphyrinogen oxidase                                           |
| CPPED1      | calcineurin-like phosphoesterase domain containing 1                 |
| CPSF1       | cleavage and polyadenylation specific factor 1, 160kDa               |
| CPSF2       | cleavage and polyadenylation specific factor 2, 100kDa               |
| CPSF3       | cleavage and polyadenylation specific factor 3, 73kDa                |
| CPSF7       | cleavage and polyadenylation specific factor 7, 59kDa                |
| CPT1C       | carnitine palmitoyltransferase 1C                                    |
| CR2         | complement component (3d/Epstein Barr virus) receptor 2              |
| CRABP2      | cellular retinoic acid binding protein 2                             |
| CRACR2A     | calcium release activated channel regulator 2A                       |
| CRADD       | CASP2 and RIPK1 domain containing adaptor with death domain          |
| CRAT        | carnitine O-acetyltransferase                                        |
| CRBN        | cereblon                                                             |
| CRCP        | CGRP receptor component                                              |
| CREB1       | cAMP responsive element binding protein 1                            |
| CREB3       | cAMP responsive element binding protein 3                            |
| CREB3L2     | cAMP responsive element binding protein 3-like 2                     |
| CREB3L4     | cAMP responsive element binding protein 3-like 4                     |

|         |                                                                                          |
|---------|------------------------------------------------------------------------------------------|
| CREBL2  | cAMP responsive element binding protein-like 2                                           |
| CREBRF  | CREB3 regulatory factor                                                                  |
| CREBZF  | CREB/ATF bZIP transcription factor                                                       |
| CRELD1  | cysteine-rich with EGF-like domains 1                                                    |
| CREM    | cAMP responsive element modulator                                                        |
| CRK     | v-crk avian sarcoma virus CT10 oncogene homolog                                          |
| CRLF2   | cytokine receptor-like factor 2                                                          |
| CRLF3   | cytokine receptor-like factor 3                                                          |
| CRLS1   | cardiolipin synthase 1                                                                   |
| CRMP1   | collapsin response mediator protein 1                                                    |
| CRTC1   | CREB regulated transcription coactivator 1                                               |
| CRTC2   | CREB regulated transcription coactivator 2                                               |
| CRYZ    | crystallin, zeta (quinone reductase)                                                     |
| CS      | citrate synthase                                                                         |
| CSAD    | cysteine sulfinic acid decarboxylase                                                     |
| CSDE1   | cold shock domain containing E1, RNA-binding                                             |
| CSE1L   | CSE1 chromosome segregation 1-like (yeast)                                               |
| CSK     | c-src tyrosine kinase                                                                    |
| CSNK1A1 | casein kinase 1, alpha 1                                                                 |
| CSNK1D  | casein kinase 1, delta                                                                   |
| CSNK1G1 | casein kinase 1, gamma 1                                                                 |
| CSNK1G2 | casein kinase 1, gamma 2                                                                 |
| CSNK1G3 | casein kinase 1, gamma 3                                                                 |
| CSPP1   | centrosome and spindle pole associated protein 1                                         |
| CSRNP1  | cysteine-serine-rich nuclear protein 1                                                   |
| CSRNP2  | cysteine-serine-rich nuclear protein 2                                                   |
| CSTF2T  | cleavage stimulation factor, 3' pre-RNA, subunit 2, 64kDa, tau variant                   |
| CSTF3   | cleavage stimulation factor, 3' pre-RNA, subunit 3, 77kDa                                |
| CTAGE5  | CTAGE family, member 5                                                                   |
| CTBS    | chitobiase, di-N-acetyl-                                                                 |
| CTC1    | CTS telomere maintenance complex component 1                                             |
| CTCF    | CCCTC-binding factor (zinc finger protein)                                               |
| CTDNEP1 | CTD nuclear envelope phosphatase 1                                                       |
| CTDP1   | CTD (carboxy-terminal domain, RNA polymerase II, polypeptide A) phosphatase, subunit 1   |
| CTDSP2  | CTD (carboxy-terminal domain, RNA polymerase II, polypeptide A) small phosphatase 2      |
| CTDSPL2 | CTD (carboxy-terminal domain, RNA polymerase II, polypeptide A) small phosphatase like 2 |
| CTF1    | cardiotrophin 1                                                                          |
| CTH     | cystathionine gamma-lyase                                                                |
| CTNNA1  | catenin (cadherin-associated protein), alpha-like 1                                      |

|                 |                                                                     |
|-----------------|---------------------------------------------------------------------|
| <b>CTNNB1</b>   | <b>catenin (cadherin-associated protein), beta 1, 88kDa</b>         |
| <b>CTNNBL1</b>  | <b>catenin, beta like 1</b>                                         |
| <b>CTNS</b>     | <b>cystinosin, lysosomal cystine transporter</b>                    |
| <b>CTR9</b>     | <b>CTR9, Paf1/RNA polymerase II complex component</b>               |
| <b>CTRB1</b>    | <b>chymotrypsinogen B1</b>                                          |
| <b>CTRL</b>     | <b>chymotrypsin-like</b>                                            |
| <b>CTSA</b>     | <b>cathepsin A</b>                                                  |
| <b>CTSC</b>     | <b>cathepsin C</b>                                                  |
| <b>CTSO</b>     | <b>cathepsin O</b>                                                  |
| <b>CTSZ</b>     | <b>cathepsin Z</b>                                                  |
| <b>CTTN</b>     | <b>cortactin</b>                                                    |
| <b>CUEDC1</b>   | <b>CUE domain containing 1</b>                                      |
| <b>CUEDC2</b>   | <b>CUE domain containing 2</b>                                      |
| <b>CUL2</b>     | <b>cullin 2</b>                                                     |
| <b>CUL4A</b>    | <b>cullin 4A</b>                                                    |
| <b>CUL5</b>     | <b>cullin 5</b>                                                     |
| <b>CUL7</b>     | <b>cullin 7</b>                                                     |
| <b>CUL9</b>     | <b>cullin 9</b>                                                     |
| <b>CUTA</b>     | <b>cutA divalent cation tolerance homolog (E. coli)</b>             |
| <b>CUTC</b>     | <b>cutC copper transporter</b>                                      |
| <b>CWC25</b>    | <b>CWC25 spliceosome-associated protein homolog (S. cerevisiae)</b> |
| <b>CWF19L1</b>  | <b>CWF19-like 1, cell cycle control (S. pombe)</b>                  |
| <b>CWF19L2</b>  | <b>CWF19-like 2, cell cycle control (S. pombe)</b>                  |
| <b>CXCR3</b>    | <b>chemokine (C-X-C motif) receptor 3</b>                           |
| <b>CXCR4</b>    | <b>chemokine (C-X-C motif) receptor 4</b>                           |
| <b>CXCR5</b>    | <b>chemokine (C-X-C motif) receptor 5</b>                           |
| <b>CXORF21</b>  | <b>chromosome X open reading frame 21</b>                           |
| <b>CXORF38</b>  | <b>chromosome X open reading frame 38</b>                           |
| <b>CXORF40A</b> | <b>chromosome X open reading frame 40A</b>                          |
| <b>CXORF40B</b> | <b>chromosome X open reading frame 40B</b>                          |
| <b>CXORF58</b>  | <b>chromosome X open reading frame 58</b>                           |
| <b>CXORF65</b>  | <b>chromosome X open reading frame 65</b>                           |
| <b>CXXC1</b>    | <b>CXXC finger protein 1</b>                                        |
| <b>CXXC4</b>    | <b>CXXC finger protein 4</b>                                        |
| <b>CYB561</b>   | <b>cytochrome b561</b>                                              |
| <b>CYB561A3</b> | <b>cytochrome b561 family, member A3</b>                            |
| <b>CYB561D1</b> | <b>cytochrome b561 family, member D1</b>                            |
| <b>CYB561D2</b> | <b>cytochrome b561 family, member D2</b>                            |
| <b>CYB5B</b>    | <b>cytochrome b5 type B (outer mitochondrial membrane)</b>          |
| <b>CYB5D1</b>   | <b>cytochrome b5 domain containing 1</b>                            |
| <b>CYB5D2</b>   | <b>cytochrome b5 domain containing 2</b>                            |

|         |                                                                                |
|---------|--------------------------------------------------------------------------------|
| CYB5R2  | cytochrome b5 reductase 2                                                      |
| CYB5R4  | cytochrome b5 reductase 4                                                      |
| CYBA    | cytochrome b-245, alpha polypeptide                                            |
| CYC1    | cytochrome c-1                                                                 |
| CYCS    | cytochrome c, somatic                                                          |
| CYP1B1  | cytochrome P450, family 1, subfamily B, polypeptide 1                          |
| CYP20A1 | cytochrome P450, family 20, subfamily A, polypeptide 1                         |
| CYP2R1  | cytochrome P450, family 2, subfamily R, polypeptide 1                          |
| CYP4V2  | cytochrome P450, family 4, subfamily V, polypeptide 2                          |
| CYP51A1 | cytochrome P450, family 51, subfamily A, polypeptide 1                         |
| CYS1    | cystin 1                                                                       |
| CYSRT1  | cysteine-rich tail protein 1                                                   |
| CYSTM1  | cysteine-rich transmembrane module containing 1                                |
| CYTH1   | cytohesin 1                                                                    |
| CYTH2   | cytohesin 2                                                                    |
| CYTIP   | cytohesin 1 interacting protein                                                |
| D2HGDH  | D-2-hydroxyglutarate dehydrogenase                                             |
| DAD1    | defender against cell death 1                                                  |
| DAGLB   | diacylglycerol lipase, beta                                                    |
| DALRD3  | DALR anticodon binding domain containing 3                                     |
| DANCR   | differentiation antagonizing non-protein coding RNA                            |
| DAP3    | death associated protein 3                                                     |
| DAPK1   | death-associated protein kinase 1                                              |
| DAPK3   | death-associated protein kinase 3                                              |
| DAPP1   | dual adaptor of phosphotyrosine and 3-phosphoinositides                        |
| DARS    | aspartyl-tRNA synthetase                                                       |
| DARS2   | aspartyl-tRNA synthetase 2, mitochondrial                                      |
| DAZAP1  | DAZ associated protein 1                                                       |
| DAZAP2  | DAZ associated protein 2                                                       |
| DBF4    | DBF4 zinc finger                                                               |
| DBI     | diazepam binding inhibitor (GABA receptor modulator, acyl-CoA binding protein) |
| DBNL    | drebrin-like                                                                   |
| DBP     | D site of albumin promoter (albumin D-box) binding protein                     |
| DBT     | dihydrolipoamide branched chain transacylase E2                                |
| DCAF10  | DDB1 and CUL4 associated factor 10                                             |
| DCAF11  | DDB1 and CUL4 associated factor 11                                             |
| DCAF13  | DDB1 and CUL4 associated factor 13                                             |
| DCAF16  | DDB1 and CUL4 associated factor 16                                             |
| DCAF17  | DDB1 and CUL4 associated factor 17                                             |
| DCAF6   | DDB1 and CUL4 associated factor 6                                              |
| DCAF7   | DDB1 and CUL4 associated factor 7                                              |

|         |                                                                                        |
|---------|----------------------------------------------------------------------------------------|
| DCAF8   | DDB1 and CUL4 associated factor 8                                                      |
| DCAKD   | dephospho-CoA kinase domain containing                                                 |
| DCDC1   | doublecortin domain containing 1                                                       |
| DCHS1   | dachsous cadherin-related 1                                                            |
| DCK     | deoxycytidine kinase                                                                   |
| DCLRE1A | DNA cross-link repair 1A                                                               |
| DCLRE1B | DNA cross-link repair 1B                                                               |
| DCLRE1C | DNA cross-link repair 1C                                                               |
| DCP1A   | decapping mRNA 1A                                                                      |
| DCPS    | decapping enzyme, scavenger                                                            |
| DCTD    | dCMP deaminase                                                                         |
| DCTN1   | dynactin 1                                                                             |
| DCTN4   | dynactin 4 (p62)                                                                       |
| DCTN5   | dynactin 5 (p25)                                                                       |
| DCTPP1  | dCTP pyrophosphatase 1                                                                 |
| DCUN1D2 | DCN1, defective in cullin neddylation 1, domain containing 2                           |
| DCUN1D3 | DCN1, defective in cullin neddylation 1, domain containing 3                           |
| DCUN1D5 | DCN1, defective in cullin neddylation 1, domain containing 5                           |
| DCXR    | dicarbonyl/L-xylulose reductase                                                        |
| DDAH2   | dimethylarginine dimethylaminohydrolase 2                                              |
| DDB2    | damage-specific DNA binding protein 2, 48kDa                                           |
| DDHD1   | DDHD domain containing 1                                                               |
| DDHD2   | DDHD domain containing 2                                                               |
| DDIAS   | DNA damage-induced apoptosis suppressor                                                |
| DDIT3   | DNA-damage-inducible transcript 3                                                      |
| DDIT4   | DNA-damage-inducible transcript 4                                                      |
| DDN     | dendrin                                                                                |
| DDOST   | dolichyl-diphosphooligosaccharide--protein glycosyltransferase subunit (non-catalytic) |
| DDR2    | discoidin domain receptor tyrosine kinase 2                                            |
| DDRGK1  | DDRGK domain containing 1                                                              |
| DDX1    | DEAD (Asp-Glu-Ala-Asp) box helicase 1                                                  |
| DDX11L2 | DEAD/H (Asp-Glu-Ala-Asp/His) box helicase 11 like 2                                    |
| DDX18   | DEAD (Asp-Glu-Ala-Asp) box polypeptide 18                                              |
| DDX19A  | DEAD (Asp-Glu-Ala-Asp) box polypeptide 19A                                             |
| DDX20   | DEAD (Asp-Glu-Ala-Asp) box polypeptide 20                                              |
| DDX21   | DEAD (Asp-Glu-Ala-Asp) box helicase 21                                                 |
| DDX25   | DEAD (Asp-Glu-Ala-Asp) box helicase 25                                                 |
| DDX27   | DEAD (Asp-Glu-Ala-Asp) box polypeptide 27                                              |
| DDX28   | DEAD (Asp-Glu-Ala-Asp) box polypeptide 28                                              |
| DDX31   | DEAD (Asp-Glu-Ala-Asp) box polypeptide 31                                              |
| DDX39A  | DEAD (Asp-Glu-Ala-Asp) box polypeptide 39A                                             |

|         |                                                    |
|---------|----------------------------------------------------|
| DDX39B  | DEAD (Asp-Glu-Ala-Asp) box polypeptide 39B         |
| DDX3X   | DEAD (Asp-Glu-Ala-Asp) box helicase 3, X-linked    |
| DDX41   | DEAD (Asp-Glu-Ala-Asp) box polypeptide 41          |
| DDX42   | DEAD (Asp-Glu-Ala-Asp) box helicase 42             |
| DDX46   | DEAD (Asp-Glu-Ala-Asp) box polypeptide 46          |
| DDX47   | DEAD (Asp-Glu-Ala-Asp) box polypeptide 47          |
| DDX49   | DEAD (Asp-Glu-Ala-Asp) box polypeptide 49          |
| DDX5    | DEAD (Asp-Glu-Ala-Asp) box helicase 5              |
| DDX50   | DEAD (Asp-Glu-Ala-Asp) box polypeptide 50          |
| DDX51   | DEAD (Asp-Glu-Ala-Asp) box polypeptide 51          |
| DDX54   | DEAD (Asp-Glu-Ala-Asp) box polypeptide 54          |
| DDX55   | DEAD (Asp-Glu-Ala-Asp) box polypeptide 55          |
| DDX56   | DEAD (Asp-Glu-Ala-Asp) box helicase 56             |
| DDX59   | DEAD (Asp-Glu-Ala-Asp) box polypeptide 59          |
| DDX6    | DEAD (Asp-Glu-Ala-Asp) box helicase 6              |
| DEAF1   | DEAF1 transcription factor                         |
| DECR1   | 2,4-dienoyl CoA reductase 1, mitochondrial         |
| DECR2   | 2,4-dienoyl CoA reductase 2, peroxisomal           |
| DEF6    | differentially expressed in FDCP 6 homolog (mouse) |
| DEGS1   | delta(4)-desaturase, sphingolipid 1                |
| DEK     | DEK proto-oncogene                                 |
| DENND1C | DENN/MADD domain containing 1C                     |
| DENND2D | DENN/MADD domain containing 2D                     |
| DENND3  | DENN/MADD domain containing 3                      |
| DENND4A | DENN/MADD domain containing 4A                     |
| DENND4B | DENN/MADD domain containing 4B                     |
| DENND5A | DENN/MADD domain containing 5A                     |
| DENND6A | DENN/MADD domain containing 6A                     |
| DENR    | density-regulated protein                          |
| DEPDC5  | DEP domain containing 5                            |
| DERL1   | derlin 1                                           |
| DERL2   | derlin 2                                           |
| DERL3   | derlin 3                                           |
| DESI1   | desumoylating isopeptidase 1                       |
| DFFA    | DNA fragmentation factor, 45kDa, alpha polypeptide |
| DGAT1   | diacylglycerol O-acyltransferase 1                 |
| DGKA    | diacylglycerol kinase, alpha 80kDa                 |
| DGKH    | diacylglycerol kinase, eta                         |
| DGUOK   | deoxyguanosine kinase                              |
| DHDDS   | dehydrodolichyl diphosphate synthase               |
| DHFR    | dihydrofolate reductase                            |

|               |                                                                                  |
|---------------|----------------------------------------------------------------------------------|
| DHFRL1        | dihydrofolate reductase-like 1                                                   |
| DHODH         | dihydroorotate dehydrogenase (quinone)                                           |
| DHPS          | deoxyhypusine synthase                                                           |
| DHRS1         | dehydrogenase/reductase (SDR family) member 1                                    |
| DHRS11        | dehydrogenase/reductase (SDR family) member 11                                   |
| DHRS13        | dehydrogenase/reductase (SDR family) member 13                                   |
| DHRS7         | dehydrogenase/reductase (SDR family) member 7                                    |
| DHRS7C        | dehydrogenase/reductase (SDR family) member 7C                                   |
| DHTKD1        | dehydrogenase E1 and transketolase domain containing 1                           |
| DHX15         | DEAH (Asp-Glu-Ala-His) box helicase 15                                           |
| DHX29         | DEAH (Asp-Glu-Ala-His) box polypeptide 29                                        |
| DHX33         | DEAH (Asp-Glu-Ala-His) box polypeptide 33                                        |
| DHX8          | DEAH (Asp-Glu-Ala-His) box polypeptide 8                                         |
| DHX9          | DEAH (Asp-Glu-Ala-His) box helicase 9                                            |
| DIABLO        | diablo, IAP-binding mitochondrial protein                                        |
| DIAPH1        | diaphanous-related formin 1                                                      |
| DIAPH3        | diaphanous-related formin 3                                                      |
| DIEXF         | digestive organ expansion factor homolog (zebrafish)                             |
| DIMT1         | DIM1 dimethyladenosine transferase 1 homolog ( <i>S. cerevisiae</i> )            |
| DIO3OS        | DIO3 opposite strand/antisense RNA (head to head)                                |
| DIP2A         | DIP2 disco-interacting protein 2 homolog A ( <i>Drosophila</i> )                 |
| DIRC2         | disrupted in renal carcinoma 2                                                   |
| DIS3          | DIS3 exosome endoribonuclease and 3'-5' exoribonuclease                          |
| DIS3L         | DIS3 like exosome 3'-5' exoribonuclease                                          |
| DIS3L2        | DIS3 like 3'-5' exoribonuclease 2                                                |
| DKFZP434I0714 | uncharacterized protein DKFZP434I0714                                            |
| DKFZP434K028  | uncharacterized LOC26070                                                         |
| DLAT          | dihydrolipoamide S-acetyltransferase                                             |
| DLD           | dihydrolipoamide dehydrogenase                                                   |
| DLEU1         | deleted in lymphocytic leukemia 1 (non-protein coding)                           |
| DLG1          | discs, large homolog 1 ( <i>Drosophila</i> )                                     |
| DLG2          | discs, large homolog 2 ( <i>Drosophila</i> )                                     |
| DLG4          | discs, large homolog 4 ( <i>Drosophila</i> )                                     |
| DLST          | dihydrolipoamide S-succinyltransferase (E2 component of 2-oxo-glutarate complex) |
| DMAP1         | DNA methyltransferase 1 associated protein 1                                     |
| DMPK          | dystrophia myotonica-protein kinase                                              |
| DMTF1         | cyclin D binding myb-like transcription factor 1                                 |
| DMWD          | dystrophia myotonica, WD repeat containing                                       |
| DMXL1         | Dmx-like 1                                                                       |
| DNA2          | DNA replication helicase/nuclease 2                                              |
| DNAAF2        | dynein, axonemal, assembly factor 2                                              |

|               |                                                              |
|---------------|--------------------------------------------------------------|
| DNAH10        | dynein, axonemal, heavy chain 10                             |
| DNAJA1        | DnaJ (Hsp40) homolog, subfamily A, member 1                  |
| DNAJA2        | DnaJ (Hsp40) homolog, subfamily A, member 2                  |
| DNAJA3        | DnaJ (Hsp40) homolog, subfamily A, member 3                  |
| DNAJB1        | DnaJ (Hsp40) homolog, subfamily B, member 1                  |
| DNAJB12       | DnaJ (Hsp40) homolog, subfamily B, member 12                 |
| DNAJB14       | DnaJ (Hsp40) homolog, subfamily B, member 14                 |
| DNAJB2        | DnaJ (Hsp40) homolog, subfamily B, member 2                  |
| DNAJB4        | DnaJ (Hsp40) homolog, subfamily B, member 4                  |
| DNAJB9        | DnaJ (Hsp40) homolog, subfamily B, member 9                  |
| DNAJC10       | DnaJ (Hsp40) homolog, subfamily C, member 10                 |
| DNAJC11       | DnaJ (Hsp40) homolog, subfamily C, member 11                 |
| DNAJC14       | DnaJ (Hsp40) homolog, subfamily C, member 14                 |
| DNAJC15       | DnaJ (Hsp40) homolog, subfamily C, member 15                 |
| DNAJC18       | DnaJ (Hsp40) homolog, subfamily C, member 18                 |
| DNAJC2        | DnaJ (Hsp40) homolog, subfamily C, member 2                  |
| DNAJC24       | DnaJ (Hsp40) homolog, subfamily C, member 24                 |
| DNAJC25       | DnaJ (Hsp40) homolog, subfamily C, member 25                 |
| DNAJC25-GNG10 | DNAJC25-GNG10 readthrough                                    |
| DNAJC27       | DnaJ (Hsp40) homolog, subfamily C, member 27                 |
| DNAJC27-AS1   | DNAJC27 antisense RNA 1                                      |
| DNAJC30       | DnaJ (Hsp40) homolog, subfamily C, member 30                 |
| DNAJC4        | DnaJ (Hsp40) homolog, subfamily C, member 4                  |
| DNAJC7        | DnaJ (Hsp40) homolog, subfamily C, member 7                  |
| DNAJC8        | DnaJ (Hsp40) homolog, subfamily C, member 8                  |
| DNAJC9        | DnaJ (Hsp40) homolog, subfamily C, member 9                  |
| DNAJC9-AS1    | DNAJC9 antisense RNA 1                                       |
| DNASE1L2      | deoxyribonuclease I-like 2                                   |
| DNASE1L3      | deoxyribonuclease I-like 3                                   |
| DNASE2        | deoxyribonuclease II, lysosomal                              |
| DND1          | DND microRNA-mediated repression inhibitor 1                 |
| DNLZ          | DNL-type zinc finger                                         |
| DNM2          | dynamain 2                                                   |
| DNMT1         | DNA (cytosine-5-)-methyltransferase 1                        |
| DNMT3A        | DNA (cytosine-5-)-methyltransferase 3 alpha                  |
| DNTTIP1       | deoxynucleotidyltransferase, terminal, interacting protein 1 |
| DNTTIP2       | deoxynucleotidyltransferase, terminal, interacting protein 2 |
| DOC2GP        | double C2-like domains, gamma, pseudogene                    |
| DOCK10        | dedicator of cytokinesis 10                                  |
| DOCK11        | dedicator of cytokinesis 11                                  |
| DOHH          | deoxyhypusine hydroxylase/monooxygenase                      |



|         |                                                                                                               |
|---------|---------------------------------------------------------------------------------------------------------------|
| DOK1    | docking protein 1, 62kDa (downstream of tyrosine kinase 1)                                                    |
| DOK2    | docking protein 2, 56kDa                                                                                      |
| DOK3    | docking protein 3                                                                                             |
| DOLK    | dolichol kinase                                                                                               |
| DONSON  | downstream neighbor of SON                                                                                    |
| DOPEY1  | dopey family member 1                                                                                         |
| DOT1L   | DOT1-like histone H3K79 methyltransferase                                                                     |
| DPAGT1  | dolichyl-phosphate (UDP-N-acetylglucosamine) N-acetylglucosaminophosphotransferase 1 (GlcNAc-1-P transferase) |
| DPF2    | D4, zinc and double PHD fingers family 2                                                                      |
| DPH1    | diphthamide biosynthesis 1                                                                                    |
| DPH3    | diphthamide biosynthesis 3                                                                                    |
| DPH5    | diphthamide biosynthesis 5                                                                                    |
| DPH6    | diphthamine biosynthesis 6                                                                                    |
| DPH7    | diphthamide biosynthesis 7                                                                                    |
| DPM2    | dolichyl-phosphate mannosyltransferase polypeptide 2, regulatory subunit                                      |
| DPM3    | dolichyl-phosphate mannosyltransferase polypeptide 3                                                          |
| DPP3    | dipeptidyl-peptidase 3                                                                                        |
| DPP8    | dipeptidyl-peptidase 8                                                                                        |
| DPP9    | dipeptidyl-peptidase 9                                                                                        |
| DPY19L3 | dpy-19-like 3 (C. elegans)                                                                                    |
| DPY19L4 | dpy-19-like 4 (C. elegans)                                                                                    |
| DQX1    | DEAQ box RNA-dependent ATPase 1                                                                               |
| DR1     | down-regulator of transcription 1, TBP-binding (negative cofactor 2)                                          |
| DRAM1   | DNA-damage regulated autophagy modulator 1                                                                    |
| DRAM2   | DNA-damage regulated autophagy modulator 2                                                                    |
| DRAP1   | DR1-associated protein 1 (negative cofactor 2 alpha)                                                          |
| DRG1    | developmentally regulated GTP binding protein 1                                                               |
| DRG2    | developmentally regulated GTP binding protein 2                                                               |
| DROSHA  | drosha, ribonuclease type III                                                                                 |
| DSCC1   | DNA replication and sister chromatid cohesion 1                                                               |
| DSCR3   | Down syndrome critical region 3                                                                               |
| DSE     | dermatan sulfate epimerase                                                                                    |
| DSTYK   | dual serine/threonine and tyrosine protein kinase                                                             |
| DTD1    | D-tyrosyl-tRNA deacylase 1                                                                                    |
| DTL     | denticleless E3 ubiquitin protein ligase homolog (Drosophila)                                                 |
| DTWD1   | DTW domain containing 1                                                                                       |
| DTX3L   | deltex 3 like, E3 ubiquitin ligase                                                                            |
| DTX4    | deltex 4, E3 ubiquitin ligase                                                                                 |
| DUS1L   | dihydrouridine synthase 1-like (S. cerevisiae)                                                                |
| DUS2    | dihydrouridine synthase 2                                                                                     |
| DUS3L   | dihydrouridine synthase 3-like (S. cerevisiae)                                                                |

|          |                                                                   |
|----------|-------------------------------------------------------------------|
| DUSP1    | dual specificity phosphatase 1                                    |
| DUSP10   | dual specificity phosphatase 10                                   |
| DUSP12   | dual specificity phosphatase 12                                   |
| DUSP16   | dual specificity phosphatase 16                                   |
| DUSP2    | dual specificity phosphatase 2                                    |
| DUSP22   | dual specificity phosphatase 22                                   |
| DUSP28   | dual specificity phosphatase 28                                   |
| DUSP5    | dual specificity phosphatase 5                                    |
| DUSP7    | dual specificity phosphatase 7                                    |
| DUT      | deoxyuridine triphosphatase                                       |
| DVL2     | dishevelled segment polarity protein 2                            |
| DXO      | decapping exoribonuclease                                         |
| DYNC1LI1 | dynein, cytoplasmic 1, light intermediate chain 1                 |
| DYNC1LI2 | dynein, cytoplasmic 1, light intermediate chain 2                 |
| DYNC2H1  | dynein, cytoplasmic 2, heavy chain 1                              |
| DYNLL1   | dynein, light chain, LC8-type 1                                   |
| DYNLRB1  | dynein, light chain, roadblock-type 1                             |
| DYNLRB2  | dynein, light chain, roadblock-type 2                             |
| DYRK1B   | dual-specificity tyrosine-(Y)-phosphorylation regulated kinase 1B |
| DYRK3    | dual-specificity tyrosine-(Y)-phosphorylation regulated kinase 3  |
| DZIP3    | DAZ interacting zinc finger protein 3                             |
| E2F1     | E2F transcription factor 1                                        |
| E2F3     | E2F transcription factor 3                                        |
| E2F4     | E2F transcription factor 4, p107/p130-binding                     |
| E2F5     | E2F transcription factor 5, p130-binding                          |
| E2F6     | E2F transcription factor 6                                        |
| E2F7     | E2F transcription factor 7                                        |
| E4F1     | E4F transcription factor 1                                        |
| EAF1     | ELL associated factor 1                                           |
| EAF2     | ELL associated factor 2                                           |
| EAPP     | E2F-associated phosphoprotein                                     |
| EARS2    | glutamyl-tRNA synthetase 2, mitochondrial                         |
| EBAG9    | estrogen receptor binding site associated, antigen, 9             |
| EBI3     | Epstein-Barr virus induced 3                                      |
| EBNA1BP2 | EBNA1 binding protein 2                                           |
| EBP      | emopamil binding protein (sterol isomerase)                       |
| ECD      | ecdysoneless homolog (Drosophila)                                 |
| ECE1     | endothelin converting enzyme 1                                    |
| ECE2     | endothelin converting enzyme 2                                    |
| ECH1     | enoyl CoA hydratase 1, peroxisomal                                |
| ECHDC1   | ethylmalonyl-CoA decarboxylase 1                                  |

|         |                                                                                        |
|---------|----------------------------------------------------------------------------------------|
| ECI1    | enoyl-CoA delta isomerase 1                                                            |
| ECSIT   | ECSIT signalling integrator                                                            |
| EDC4    | enhancer of mRNA decapping 4                                                           |
| EDEM1   | ER degradation enhancer, mannosidase alpha-like 1                                      |
| EDEM3   | ER degradation enhancer, mannosidase alpha-like 3                                      |
| EDRF1   | erythroid differentiation regulatory factor 1                                          |
| EEA1    | early endosome antigen 1                                                               |
| EED     | embryonic ectoderm development                                                         |
| EEF1A1  | eukaryotic translation elongation factor 1 alpha 1                                     |
| EEF1B2  | eukaryotic translation elongation factor 1 beta 2                                      |
| EEF1D   | eukaryotic translation elongation factor 1 delta (guanine nucleotide exchange protein) |
| EEF1G   | eukaryotic translation elongation factor 1 gamma                                       |
| EEF2    | eukaryotic translation elongation factor 2                                             |
| EEF2K   | eukaryotic elongation factor 2 kinase                                                  |
| EEFSEC  | eukaryotic elongation factor, selenocysteine-tRNA-specific                             |
| EFCAB12 | EF-hand calcium binding domain 12                                                      |
| EFCAB13 | EF-hand calcium binding domain 13                                                      |
| EFCAB2  | EF-hand calcium binding domain 2                                                       |
| EFCAB7  | EF-hand calcium binding domain 7                                                       |
| EFNA4   | ephrin-A4                                                                              |
| EFNB2   | ephrin-B2                                                                              |
| EFTUD2  | elongation factor Tu GTP binding domain containing 2                                   |
| EGFEM1P | EGF-like and EMI domain containing 1, pseudogene                                       |
| EGLN2   | egl-9 family hypoxia-inducible factor 2                                                |
| EGOT    | eosinophil granule ontogeny transcript (non-protein coding)                            |
| EGR1    | early growth response 1                                                                |
| EGR2    | early growth response 2                                                                |
| EGR3    | early growth response 3                                                                |
| EHBP1L1 | EH domain binding protein 1-like 1                                                     |
| EHD1    | EH-domain containing 1                                                                 |
| EHD4    | EH-domain containing 4                                                                 |
| EHMT1   | euchromatic histone-lysine N-methyltransferase 1                                       |
| EID1    | EP300 interacting inhibitor of differentiation 1                                       |
| EID2B   | EP300 interacting inhibitor of differentiation 2B                                      |
| EIF1    | eukaryotic translation initiation factor 1                                             |
| EIF1AD  | eukaryotic translation initiation factor 1A domain containing                          |
| EIF1B   | eukaryotic translation initiation factor 1B                                            |
| EIF2A   | eukaryotic translation initiation factor 2A, 65kDa                                     |
| EIF2AK3 | eukaryotic translation initiation factor 2-alpha kinase 3                              |
| EIF2B1  | eukaryotic translation initiation factor 2B, subunit 1 alpha, 26kDa                    |
| EIF2B3  | eukaryotic translation initiation factor 2B, subunit 3 gamma, 58kDa                    |

|           |                                                                       |
|-----------|-----------------------------------------------------------------------|
| EIF2B4    | eukaryotic translation initiation factor 2B, subunit 4 delta, 67kDa   |
| EIF2B5    | eukaryotic translation initiation factor 2B, subunit 5 epsilon, 82kDa |
| EIF2D     | eukaryotic translation initiation factor 2D                           |
| EIF2S1    | eukaryotic translation initiation factor 2, subunit 1 alpha, 35kDa    |
| EIF2S2    | eukaryotic translation initiation factor 2, subunit 2 beta, 38kDa     |
| EIF2S3    | eukaryotic translation initiation factor 2, subunit 3 gamma, 52kDa    |
| EIF3A     | eukaryotic translation initiation factor 3, subunit A                 |
| EIF3D     | eukaryotic translation initiation factor 3, subunit D                 |
| EIF3E     | eukaryotic translation initiation factor 3, subunit E                 |
| EIF3F     | eukaryotic translation initiation factor 3, subunit F                 |
| EIF3G     | eukaryotic translation initiation factor 3, subunit G                 |
| EIF3H     | eukaryotic translation initiation factor 3, subunit H                 |
| EIF3J     | eukaryotic translation initiation factor 3, subunit J                 |
| EIF3K     | eukaryotic translation initiation factor 3, subunit K                 |
| EIF3M     | eukaryotic translation initiation factor 3, subunit M                 |
| EIF4A1    | eukaryotic translation initiation factor 4A1                          |
| EIF4A2    | eukaryotic translation initiation factor 4A2                          |
| EIF4A3    | eukaryotic translation initiation factor 4A3                          |
| EIF4B     | eukaryotic translation initiation factor 4B                           |
| EIF4E     | eukaryotic translation initiation factor 4E                           |
| EIF4E2    | eukaryotic translation initiation factor 4E family member 2           |
| EIF4EBP3  | eukaryotic translation initiation factor 4E binding protein 3         |
| EIF4ENIF1 | eukaryotic translation initiation factor 4E nuclear import factor 1   |
| EIF4G2    | eukaryotic translation initiation factor 4 gamma, 2                   |
| EIF4H     | eukaryotic translation initiation factor 4H                           |
| EIF5      | eukaryotic translation initiation factor 5                            |
| EIF5A     | eukaryotic translation initiation factor 5A                           |
| EIF5B     | eukaryotic translation initiation factor 5B                           |
| ELAVL1    | ELAV like RNA binding protein 1                                       |
| ELAVL3    | ELAV like neuron-specific RNA binding protein 3                       |
| ELF1      | E74-like factor 1 (ets domain transcription factor)                   |
| ELF4      | E74-like factor 4 (ets domain transcription factor)                   |
| ELK1      | ELK1, member of ETS oncogene family                                   |
| ELK3      | ELK3, ETS-domain protein (SRF accessory protein 2)                    |
| ELK4      | ELK4, ETS-domain protein (SRF accessory protein 1)                    |
| ELL2      | elongation factor, RNA polymerase II, 2                               |
| ELL3      | elongation factor RNA polymerase II-like 3                            |
| ELMOD3    | ELMO/CED-12 domain containing 3                                       |
| ELMSAN1   | ELM2 and Myb/SANT-like domain containing 1                            |
| ELOF1     | elongation factor 1 homolog ( <i>S. cerevisiae</i> )                  |
| ELOVL1    | ELOVL fatty acid elongase 1                                           |

|              |                                                                       |
|--------------|-----------------------------------------------------------------------|
| ELOVL5       | ELOVL fatty acid elongase 5                                           |
| ELP2         | elongator acetyltransferase complex subunit 2                         |
| ELP3         | elongator acetyltransferase complex subunit 3                         |
| ELP4         | elongator acetyltransferase complex subunit 4                         |
| ELP5         | elongator acetyltransferase complex subunit 5                         |
| ELP6         | elongator acetyltransferase complex subunit 6                         |
| EMC1         | ER membrane protein complex subunit 1                                 |
| EMC3         | ER membrane protein complex subunit 3                                 |
| EMC4         | ER membrane protein complex subunit 4                                 |
| EMC6         | ER membrane protein complex subunit 6                                 |
| EMC7         | ER membrane protein complex subunit 7                                 |
| EMC9         | ER membrane protein complex subunit 9                                 |
| EME1         | essential meiotic structure-specific endonuclease 1                   |
| EME2         | essential meiotic structure-specific endonuclease subunit 2           |
| EMG1         | EMG1 N1-specific pseudouridine methyltransferase                      |
| EMP1         | epithelial membrane protein 1                                         |
| ENC1         | ectodermal-neural cortex 1 (with BTB domain)                          |
| ENDOG        | endonuclease G                                                        |
| ENKD1        | enkurin domain containing 1                                           |
| ENKUR        | enkurin, TRPC channel interacting protein                             |
| ENO1         | enolase 1, (alpha)                                                    |
| ENO1-AS1     | ENO1 antisense RNA 1                                                  |
| ENO2         | enolase 2 (gamma, neuronal)                                           |
| ENOPH1       | enolase-phosphatase 1                                                 |
| ENOSF1       | enolase superfamily member 1                                          |
| ENSA         | endosulfine alpha                                                     |
| ENTHD2       | ENTH domain containing 2                                              |
| ENY2         | enhancer of yellow 2 homolog (Drosophila)                             |
| EOGT         | EGF domain-specific O-linked N-acetylglucosamine (GlcNAc) transferase |
| EP300        | E1A binding protein p300                                              |
| EP400        | E1A binding protein p400                                              |
| EP400NL      | EP400 N-terminal like                                                 |
| EPB41L2      | erythrocyte membrane protein band 4.1-like 2                          |
| EPB41L4A-AS1 | EPB41L4A antisense RNA 1                                              |
| EPC1         | enhancer of polycomb homolog 1 (Drosophila)                           |
| EPC2         | enhancer of polycomb homolog 2 (Drosophila)                           |
| EPHX3        | epoxide hydrolase 3                                                   |
| EPM2A        | epilepsy, progressive myoclonus type 2A, Lafora disease (laforin)     |
| EPM2AIP1     | EPM2A (laforin) interacting protein 1                                 |
| EPN1         | epsin 1                                                               |
| EPRS         | glutamyl-prolyl-tRNA synthetase                                       |

|         |                                                                               |
|---------|-------------------------------------------------------------------------------|
| EPS15   | epidermal growth factor receptor pathway substrate 15                         |
| EPSTI1  | epithelial stromal interaction 1 (breast)                                     |
| EPT1    | ethanolaminephosphotransferase 1                                              |
| ERAL1   | Era-like 12S mitochondrial rRNA chaperone 1                                   |
| ERAP1   | endoplasmic reticulum aminopeptidase 1                                        |
| ERBB2IP | erbb2 interacting protein                                                     |
| ERCC1   | excision repair cross-complementation group 1                                 |
| ERCC3   | excision repair cross-complementation group 3                                 |
| ERCC5   | excision repair cross-complementation group 5                                 |
| ERCC6   | excision repair cross-complementation group 6                                 |
| ERCC6L2 | excision repair cross-complementation group 6-like 2                          |
| ERH     | enhancer of rudimentary homolog (Drosophila)                                  |
| ERI2    | ERI1 exoribonuclease family member 2                                          |
| ERLEC1  | endoplasmic reticulum lectin 1                                                |
| ERLIN1  | ER lipid raft associated 1                                                    |
| ERLIN2  | ER lipid raft associated 2                                                    |
| ERMARD  | ER membrane-associated RNA degradation                                        |
| ERMN    | ermin, ERM-like protein                                                       |
| ERMP1   | endoplasmic reticulum metallopeptidase 1                                      |
| ERN1    | endoplasmic reticulum to nucleus signaling 1                                  |
| ERP27   | endoplasmic reticulum protein 27                                              |
| ERP29   | endoplasmic reticulum protein 29                                              |
| ESAM    | endothelial cell adhesion molecule                                            |
| ESCO1   | establishment of sister chromatid cohesion N-acetyltransferase 1              |
| ESCO2   | establishment of sister chromatid cohesion N-acetyltransferase 2              |
| ESD     | esterase D                                                                    |
| ESF1    | ESF1, nucleolar pre-rRNA processing protein, homolog ( <i>S. cerevisiae</i> ) |
| ESPL1   | extra spindle pole bodies homolog 1 ( <i>S. cerevisiae</i> )                  |
| ESR2    | estrogen receptor 2 (ER beta)                                                 |
| ESYT1   | extended synaptotagmin-like protein 1                                         |
| ESYT2   | extended synaptotagmin-like protein 2                                         |
| ETF1    | eukaryotic translation termination factor 1                                   |
| ETFA    | electron-transfer-flavoprotein, alpha polypeptide                             |
| ETFB    | electron-transfer-flavoprotein, beta polypeptide                              |
| ETFDH   | electron-transferring-flavoprotein dehydrogenase                              |
| ETV2    | ets variant 2                                                                 |
| ETV3    | ets variant 3                                                                 |
| ETV5    | ets variant 5                                                                 |
| ETV6    | ets variant 6                                                                 |
| EVC     | Ellis van Creveld protein                                                     |
| EVI2A   | ecotropic viral integration site 2A                                           |

|           |                                                           |
|-----------|-----------------------------------------------------------|
| EVL       | Enah/Vasp-like                                            |
| EWSR1     | EWS RNA-binding protein 1                                 |
| EXD1      | exonuclease 3'-5' domain containing 1                     |
| EXD3      | exonuclease 3'-5' domain containing 3                     |
| EXO1      | exonuclease 1                                             |
| EXOC2     | exocyst complex component 2                               |
| EXOC3L1   | exocyst complex component 3-like 1                        |
| EXOC8     | exocyst complex component 8                               |
| EXOG      | endo/exonuclease (5'-3'), endonuclease G-like             |
| EXOSC1    | exosome component 1                                       |
| EXOSC3    | exosome component 3                                       |
| EXOSC4    | exosome component 4                                       |
| EXOSC5    | exosome component 5                                       |
| EXOSC6    | exosome component 6                                       |
| EXOSC7    | exosome component 7                                       |
| EXOSC8    | exosome component 8                                       |
| EXOSC9    | exosome component 9                                       |
| EXT1      | exostosin glycosyltransferase 1                           |
| EYA3      | EYA transcriptional coactivator and phosphatase 3         |
| EZH1      | enhancer of zeste 1 polycomb repressive complex 2 subunit |
| EZH2      | enhancer of zeste 2 polycomb repressive complex 2 subunit |
| EZR       | ezrin                                                     |
| F10       | coagulation factor X                                      |
| F11R      | F11 receptor                                              |
| F2RL3     | coagulation factor II (thrombin) receptor-like 3          |
| FABP5P3   | fatty acid binding protein 5 pseudogene 3                 |
| FADD      | Fas (TNFRSF6)-associated via death domain                 |
| FADS1     | fatty acid desaturase 1                                   |
| FADS2     | fatty acid desaturase 2                                   |
| FAF1      | Fas (TNFRSF6) associated factor 1                         |
| FAF2      | Fas associated factor family member 2                     |
| FAHD1     | fumarylacetoacetate hydrolase domain containing 1         |
| FAM102B   | family with sequence similarity 102, member B             |
| FAM104A   | family with sequence similarity 104, member A             |
| FAM109A   | family with sequence similarity 109, member A             |
| FAM111A   | family with sequence similarity 111, member A             |
| FAM111B   | family with sequence similarity 111, member B             |
| FAM114A2  | family with sequence similarity 114, member A2            |
| FAM118B   | family with sequence similarity 118, member B             |
| FAM120A   | family with sequence similarity 120A                      |
| FAM120AOS | family with sequence similarity 120A opposite strand      |

|          |                                                          |
|----------|----------------------------------------------------------|
| FAM122A  | family with sequence similarity 122A                     |
| FAM122C  | family with sequence similarity 122C                     |
| FAM126B  | family with sequence similarity 126, member B            |
| FAM129A  | family with sequence similarity 129, member A            |
| FAM129C  | family with sequence similarity 129, member C            |
| FAM131A  | family with sequence similarity 131, member A            |
| FAM131C  | family with sequence similarity 131, member C            |
| FAM133B  | family with sequence similarity 133, member B            |
| FAM134A  | family with sequence similarity 134, member A            |
| FAM134C  | family with sequence similarity 134, member C            |
| FAM135A  | family with sequence similarity 135, member A            |
| FAM13B   | family with sequence similarity 13, member B             |
| FAM149B1 | family with sequence similarity 149, member B1           |
| FAM160A2 | family with sequence similarity 160, member A2           |
| FAM161A  | family with sequence similarity 161, member A            |
| FAM161B  | family with sequence similarity 161, member B            |
| FAM162A  | family with sequence similarity 162, member A            |
| FAM167A  | family with sequence similarity 167, member A            |
| FAM168A  | family with sequence similarity 168, member A            |
| FAM172A  | family with sequence similarity 172, member A            |
| FAM172BP | family with sequence similarity 172, member B pseudogene |
| FAM173A  | family with sequence similarity 173, member A            |
| FAM173B  | family with sequence similarity 173, member B            |
| FAM175A  | family with sequence similarity 175, member A            |
| FAM177A1 | family with sequence similarity 177, member A1           |
| FAM178A  | family with sequence similarity 178, member A            |
| FAM179B  | family with sequence similarity 179, member B            |
| FAM184A  | family with sequence similarity 184, member A            |
| FAM199X  | family with sequence similarity 199, X-linked            |
| FAM200A  | family with sequence similarity 200, member A            |
| FAM200B  | family with sequence similarity 200, member B            |
| FAM207A  | family with sequence similarity 207, member A            |
| FAM208A  | family with sequence similarity 208, member A            |
| FAM210A  | family with sequence similarity 210, member A            |
| FAM212A  | family with sequence similarity 212, member A            |
| FAM212B  | family with sequence similarity 212, member B            |
| FAM213A  | family with sequence similarity 213, member A            |
| FAM216A  | family with sequence similarity 216, member A            |
| FAM218A  | family with sequence similarity 218, member A            |
| FAM219B  | family with sequence similarity 219, member B            |
| FAM222A  | family with sequence similarity 222, member A            |



|         |                                                                             |
|---------|-----------------------------------------------------------------------------|
| FAM222B | family with sequence similarity 222, member B                               |
| FAM227B | family with sequence similarity 227, member B                               |
| FAM32A  | family with sequence similarity 32, member A                                |
| FAM35A  | family with sequence similarity 35, member A                                |
| FAM3C   | family with sequence similarity 3, member C                                 |
| FAM41C  | family with sequence similarity 41, member C                                |
| FAM49B  | family with sequence similarity 49, member B                                |
| FAM50B  | family with sequence similarity 50, member B                                |
| FAM53C  | family with sequence similarity 53, member C                                |
| FAM60A  | family with sequence similarity 60, member A                                |
| FAM63B  | family with sequence similarity 63, member B                                |
| FAM69A  | family with sequence similarity 69, member A                                |
| FAM76B  | family with sequence similarity 76, member B                                |
| FAM78A  | family with sequence similarity 78, member A                                |
| FAM83D  | family with sequence similarity 83, member D                                |
| FAM83E  | family with sequence similarity 83, member E                                |
| FAM8A1  | family with sequence similarity 8, member A1                                |
| FAM96A  | family with sequence similarity 96, member A                                |
| FAM96B  | family with sequence similarity 96, member B                                |
| FAM98A  | family with sequence similarity 98, member A                                |
| FAM98B  | family with sequence similarity 98, member B                                |
| FANCA   | Fanconi anemia, complementation group A                                     |
| FANCD2  | Fanconi anemia, complementation group D2                                    |
| FANCF   | Fanconi anemia, complementation group F                                     |
| FANCG   | Fanconi anemia, complementation group G                                     |
| FARP2   | FERM, RhoGEF and pleckstrin domain protein 2                                |
| FARSA   | phenylalanyl-tRNA synthetase, alpha subunit                                 |
| FARSB   | phenylalanyl-tRNA synthetase, beta subunit                                  |
| FAS     | Fas cell surface death receptor                                             |
| FAS-AS1 | FAS antisense RNA 1                                                         |
| FASN    | fatty acid synthase                                                         |
| FASTK   | Fas-activated serine/threonine kinase                                       |
| FASTKD1 | FAST kinase domains 1                                                       |
| FASTKD2 | FAST kinase domains 2                                                       |
| FASTKD5 | FAST kinase domains 5                                                       |
| FAU     | Finkel-Biskis-Reilly murine sarcoma virus (FBR-MuSV) ubiquitously expressed |
| FBL     | fibrillarlin                                                                |
| FBXL12  | F-box and leucine-rich repeat protein 12                                    |
| FBXL14  | F-box and leucine-rich repeat protein 14                                    |
| FBXL15  | F-box and leucine-rich repeat protein 15                                    |
| FBXL17  | F-box and leucine-rich repeat protein 17                                    |

|                   |                                                                             |
|-------------------|-----------------------------------------------------------------------------|
| <b>FBXL18</b>     | <b>F-box and leucine-rich repeat protein 18</b>                             |
| <b>FBXL19</b>     | <b>F-box and leucine-rich repeat protein 19</b>                             |
| <b>FBXL19-AS1</b> | <b>FBXL19 antisense RNA 1 (head to head)</b>                                |
| <b>FBXL20</b>     | <b>F-box and leucine-rich repeat protein 20</b>                             |
| <b>FBXL22</b>     | <b>F-box and leucine-rich repeat protein 22</b>                             |
| <b>FBXL5</b>      | <b>F-box and leucine-rich repeat protein 5</b>                              |
| <b>FBXL8</b>      | <b>F-box and leucine-rich repeat protein 8</b>                              |
| <b>FBXO10</b>     | <b>F-box protein 10</b>                                                     |
| <b>FBXO11</b>     | <b>F-box protein 11</b>                                                     |
| <b>FBXO15</b>     | <b>F-box protein 15</b>                                                     |
| <b>FBXO18</b>     | <b>F-box protein, helicase, 18</b>                                          |
| <b>FBXO22</b>     | <b>F-box protein 22</b>                                                     |
| <b>FBXO24</b>     | <b>F-box protein 24</b>                                                     |
| <b>FBXO30</b>     | <b>F-box protein 30</b>                                                     |
| <b>FBXO31</b>     | <b>F-box protein 31</b>                                                     |
| <b>FBXO33</b>     | <b>F-box protein 33</b>                                                     |
| <b>FBXO34</b>     | <b>F-box protein 34</b>                                                     |
| <b>FBXO36</b>     | <b>F-box protein 36</b>                                                     |
| <b>FBXO38</b>     | <b>F-box protein 38</b>                                                     |
| <b>FBXO4</b>      | <b>F-box protein 4</b>                                                      |
| <b>FBXO41</b>     | <b>F-box protein 41</b>                                                     |
| <b>FBXO45</b>     | <b>F-box protein 45</b>                                                     |
| <b>FBXO46</b>     | <b>F-box protein 46</b>                                                     |
| <b>FBXO5</b>      | <b>F-box protein 5</b>                                                      |
| <b>FBXO8</b>      | <b>F-box protein 8</b>                                                      |
| <b>FBXW11</b>     | <b>F-box and WD repeat domain containing 11</b>                             |
| <b>FBXW2</b>      | <b>F-box and WD repeat domain containing 2</b>                              |
| <b>FBXW4</b>      | <b>F-box and WD repeat domain containing 4</b>                              |
| <b>FBXW5</b>      | <b>F-box and WD repeat domain containing 5</b>                              |
| <b>FBXW7</b>      | <b>F-box and WD repeat domain containing 7, E3 ubiquitin protein ligase</b> |
| <b>FBXW8</b>      | <b>F-box and WD repeat domain containing 8</b>                              |
| <b>FBXW9</b>      | <b>F-box and WD repeat domain containing 9</b>                              |
| <b>FCER2</b>      | <b>Fc fragment of IgE, low affinity II, receptor for (CD23)</b>             |
| <b>FCHSD2</b>     | <b>FCH and double SH3 domains 2</b>                                         |
| <b>FCMR</b>       | <b>Fc fragment of IgM receptor</b>                                          |
| <b>FCRL5</b>      | <b>Fc receptor-like 5</b>                                                   |
| <b>FCRLA</b>      | <b>Fc receptor-like A</b>                                                   |
| <b>FDPS</b>       | <b>farnesyl diphosphate synthase</b>                                        |
| <b>FDX1L</b>      | <b>ferredoxin 1-like</b>                                                    |
| <b>FDXACB1</b>    | <b>ferredoxin-fold anticodon binding domain containing 1</b>                |
| <b>FDXR</b>       | <b>ferredoxin reductase</b>                                                 |

|            |                                                                  |
|------------|------------------------------------------------------------------|
| FEM1A      | fem-1 homolog a (C. elegans)                                     |
| FEM1B      | fem-1 homolog b (C. elegans)                                     |
| FEN1       | flap structure-specific endonuclease 1                           |
| FER        | fer (fps/fes related) tyrosine kinase                            |
| FERMT3     | fermitin family member 3                                         |
| FFAR1      | free fatty acid receptor 1                                       |
| FGD3       | FYVE, RhoGEF and PH domain containing 3                          |
| FGD6       | FYVE, RhoGEF and PH domain containing 6                          |
| FGF11      | fibroblast growth factor 11                                      |
| FGF14-IT1  | FGF14 intronic transcript 1                                      |
| FGF2       | fibroblast growth factor 2 (basic)                               |
| FGFR1OP2   | FGFR1 oncogene partner 2                                         |
| FGR        | FGR proto-oncogene, Src family tyrosine kinase                   |
| FHOD1      | formin homology 2 domain containing 1                            |
| FIBP       | fibroblast growth factor (acidic) intracellular binding protein  |
| FIP1L1     | factor interacting with PAPOLA and CPSF1                         |
| FIS1       | fission 1 (mitochondrial outer membrane) homolog (S. cerevisiae) |
| FIZ1       | FLT3-interacting zinc finger 1                                   |
| FKBP11     | FK506 binding protein 11, 19 kDa                                 |
| FKBP15     | FK506 binding protein 15, 133kDa                                 |
| FKBP2      | FK506 binding protein 2, 13kDa                                   |
| FKBP5      | FK506 binding protein 5                                          |
| FKBP7      | FK506 binding protein 7                                          |
| FKTN       | fukutin                                                          |
| FLAD1      | flavin adenine dinucleotide synthetase 1                         |
| FLI1       | Fli-1 proto-oncogene, ETS transcription factor                   |
| FLJ10038   | uncharacterized protein FLJ10038                                 |
| FLJ13224   | uncharacterized LOC79857                                         |
| FLJ21408   | uncharacterized LOC400512                                        |
| FLJ22447   | uncharacterized LOC400221                                        |
| FLJ31306   |                                                                  |
| FLJ37035   | uncharacterized LOC399821                                        |
| FLJ37453   | uncharacterized LOC729614                                        |
| FLJ42351   | uncharacterized LOC400999                                        |
| FLOT2      | flotillin 2                                                      |
| FLT3LG     | fms-related tyrosine kinase 3 ligand                             |
| FLVCR1     | feline leukemia virus subgroup C cellular receptor 1             |
| FLVCR1-AS1 | FLVCR1 antisense RNA 1 (head to head)                            |
| FLYWCH2    | FLYWCH family member 2                                           |
| FMNL3      | formin-like 3                                                    |
| FNBP1      | formin binding protein 1                                         |

|                    |                                                                                          |
|--------------------|------------------------------------------------------------------------------------------|
| <b>FNBP4</b>       | <b>formin binding protein 4</b>                                                          |
| <b>FNDC3A</b>      | <b>fibronectin type III domain containing 3A</b>                                         |
| <b>FNDC3B</b>      | <b>fibronectin type III domain containing 3B</b>                                         |
| <b>FNIP1</b>       | <b>folliculin interacting protein 1</b>                                                  |
| <b>FNTA</b>        | <b>farnesyltransferase, CAAX box, alpha</b>                                              |
| <b>FNTB</b>        | <b>farnesyltransferase, CAAX box, beta</b>                                               |
| <b>FOSB</b>        | <b>FBJ murine osteosarcoma viral oncogene homolog B</b>                                  |
| <b>FOXI1</b>       | <b>forkhead box I1</b>                                                                   |
| <b>FOXJ3</b>       | <b>forkhead box J3</b>                                                                   |
| <b>FOXN2</b>       | <b>forkhead box N2</b>                                                                   |
| <b>FOXO3</b>       | <b>forkhead box O3</b>                                                                   |
| <b>FOXP4</b>       | <b>forkhead box P4</b>                                                                   |
| <b>FOXRED2</b>     | <b>FAD-dependent oxidoreductase domain containing 2</b>                                  |
| <b>FPGS</b>        | <b>folylpolyglutamate synthase</b>                                                       |
| <b>FPGT</b>        | <b>fucose-1-phosphate guanylyltransferase</b>                                            |
| <b>FPGT-TNNI3K</b> | <b>FPGT-TNNI3K readthrough</b>                                                           |
| <b>FRA10AC1</b>    | <b>fragile site, folic acid type, rare, fra(10)(q23.3) or fra(10)(q24.2) candidate 1</b> |
| <b>FRG1</b>        | <b>FSHD region gene 1</b>                                                                |
| <b>FRS3</b>        | <b>fibroblast growth factor receptor substrate 3</b>                                     |
| <b>FSCN1</b>       | <b>fascin actin-bundling protein 1</b>                                                   |
| <b>FSD1L</b>       | <b>fibronectin type III and SPRY domain containing 1-like</b>                            |
| <b>FSD2</b>        | <b>fibronectin type III and SPRY domain containing 2</b>                                 |
| <b>FTH1</b>        | <b>ferritin, heavy polypeptide 1</b>                                                     |
| <b>FTL</b>         | <b>ferritin, light polypeptide</b>                                                       |
| <b>FTSJ2</b>       | <b>FtsJ RNA methyltransferase homolog 2 (E. coli)</b>                                    |
| <b>FTSJ3</b>       | <b>FtsJ homolog 3 (E. coli)</b>                                                          |
| <b>FUBP1</b>       | <b>far upstream element (FUSE) binding protein 1</b>                                     |
| <b>FUCA2</b>       | <b>fucosidase, alpha-L- 2, plasma</b>                                                    |
| <b>FUK</b>         | <b>fucokinase</b>                                                                        |
| <b>FUNDC2</b>      | <b>FUN14 domain containing 2</b>                                                         |
| <b>FUS</b>         | <b>FUS RNA binding protein</b>                                                           |
| <b>FUT10</b>       | <b>fucosyltransferase 10 (alpha (1,3) fucosyltransferase)</b>                            |
| <b>FUT11</b>       | <b>fucosyltransferase 11 (alpha (1,3) fucosyltransferase)</b>                            |
| <b>FUT8</b>        | <b>fucosyltransferase 8 (alpha (1,6) fucosyltransferase)</b>                             |
| <b>FYCO1</b>       | <b>FYVE and coiled-coil domain containing 1</b>                                          |
| <b>FYTTD1</b>      | <b>forty-two-three domain containing 1</b>                                               |
| <b>FZR1</b>        | <b>fizzy/cell division cycle 20 related 1 (Drosophila)</b>                               |
| <b>G0S2</b>        | <b>G0/G1 switch 2</b>                                                                    |
| <b>G3BP1</b>       | <b>GTPase activating protein (SH3 domain) binding protein 1</b>                          |
| <b>G3BP2</b>       | <b>GTPase activating protein (SH3 domain) binding protein 2</b>                          |
| <b>G6PC3</b>       | <b>glucose 6 phosphatase, catalytic, 3</b>                                               |

|            |                                                                                                                            |
|------------|----------------------------------------------------------------------------------------------------------------------------|
| GAB2       | GRB2-associated binding protein 2                                                                                          |
| GABARAP    | GABA(A) receptor-associated protein                                                                                        |
| GABPA      | GA binding protein transcription factor, alpha subunit 60kDa                                                               |
| GABPB1     | GA binding protein transcription factor, beta subunit 1                                                                    |
| GABPB2     | GA binding protein transcription factor, beta subunit 2                                                                    |
| GADD45A    | growth arrest and DNA-damage-inducible, alpha                                                                              |
| GADD45B    | growth arrest and DNA-damage-inducible, beta                                                                               |
| GADD45GIP1 | growth arrest and DNA-damage-inducible, gamma interacting protein 1                                                        |
| GAK        | cyclin G associated kinase                                                                                                 |
| GALE       | UDP-galactose-4-epimerase                                                                                                  |
| GALK2      | galactokinase 2                                                                                                            |
| GALM       | galactose mutarotase (aldose 1-epimerase)                                                                                  |
| GALNT4     | polypeptide N-acetylgalactosaminyltransferase 4                                                                            |
| GALR2      | galanin receptor 2                                                                                                         |
| GANAB      | glucosidase, alpha; neutral AB                                                                                             |
| GANC       | glucosidase, alpha; neutral C                                                                                              |
| GAPDH      | glyceraldehyde-3-phosphate dehydrogenase                                                                                   |
| GAPVD1     | GTPase activating protein and VPS9 domains 1                                                                               |
| GAR1       | GAR1 ribonucleoprotein                                                                                                     |
| GARS       | glycyl-tRNA synthetase                                                                                                     |
| GART       | phosphoribosylglycinamide formyltransferase, phosphoribosylglycinamide synthetase, phosphoribosylaminoimidazole synthetase |
| GAS5       | growth arrest-specific 5 (non-protein coding)                                                                              |
| GATAD1     | GATA zinc finger domain containing 1                                                                                       |
| GATAD2B    | GATA zinc finger domain containing 2B                                                                                      |
| GATB       | glutamyl-tRNA(Gln) amidotransferase, subunit B                                                                             |
| GATC       | glutamyl-tRNA(Gln) amidotransferase, subunit C                                                                             |
| GATS       | GATS, stromal antigen 3 opposite strand                                                                                    |
| GATSL3     | GATS protein-like 3                                                                                                        |
| GBA        | glucosidase, beta, acid                                                                                                    |
| GBAP1      | glucosidase, beta, acid pseudogene 1                                                                                       |
| GBE1       | glucan (1,4-alpha-), branching enzyme 1                                                                                    |
| GCA        | granalcin, EF-hand calcium binding protein                                                                                 |
| GCDH       | glutaryl-CoA dehydrogenase                                                                                                 |
| GCFC2      | GC-rich sequence DNA-binding factor 2                                                                                      |
| GCHFR      | GTP cyclohydrolase I feedback regulator                                                                                    |
| GCLC       | glutamate-cysteine ligase, catalytic subunit                                                                               |
| GCN1L1     | GCN1 general control of amino-acid synthesis 1-like 1 (yeast)                                                              |
| GCNT1      | glucosaminyl (N-acetyl) transferase 1, core 2                                                                              |
| GDF9       | growth differentiation factor 9                                                                                            |
| GDI2       | GDP dissociation inhibitor 2                                                                                               |
| GEM        | GTP binding protein overexpressed in skeletal muscle                                                                       |

|          |                                                                       |
|----------|-----------------------------------------------------------------------|
| GEMIN7   | gem (nuclear organelle) associated protein 7                          |
| GET4     | golgi to ER traffic protein 4 homolog ( <i>S. cerevisiae</i> )        |
| GFER     | growth factor, augments liver regeneration                            |
| GFI1     | growth factor independent 1 transcription repressor                   |
| GFM1     | G elongation factor, mitochondrial 1                                  |
| GFM2     | G elongation factor, mitochondrial 2                                  |
| GFOD2    | glucose-fructose oxidoreductase domain containing 2                   |
| GGA1     | golgi-associated, gamma adaptin ear containing, ARF binding protein 1 |
| GGA2     | golgi-associated, gamma adaptin ear containing, ARF binding protein 2 |
| GGA3     | golgi-associated, gamma adaptin ear containing, ARF binding protein 3 |
| GGCT     | gamma-glutamylcyclotransferase                                        |
| GGCX     | gamma-glutamyl carboxylase                                            |
| GGN      | gametogenetin                                                         |
| GGNBP2   | gametogenetin binding protein 2                                       |
| GGPS1    | geranylgeranyl diphosphate synthase 1                                 |
| GGT5     | gamma-glutamyltransferase 5                                           |
| GHITM    | growth hormone inducible transmembrane protein                        |
| GHRL     | ghrelin/obestatin prepropeptide                                       |
| GID4     | GID complex subunit 4                                                 |
| GIMAP8   | GTPase, IMAP family member 8                                          |
| GIN1     | gypsy retrotransposon integrase 1                                     |
| GINM1    | glycoprotein integral membrane 1                                      |
| GINS1    | GINS complex subunit 1 (Psf1 homolog)                                 |
| GINS3    | GINS complex subunit 3 (Psf3 homolog)                                 |
| GINS4    | GINS complex subunit 4 (Sld5 homolog)                                 |
| GIPR     | gastric inhibitory polypeptide receptor                               |
| GLB1     | galactosidase, beta 1                                                 |
| GLB1L    | galactosidase, beta 1-like                                            |
| GLCCI1   | glucocorticoid induced 1                                              |
| GLE1     | GLE1 RNA export mediator                                              |
| GLG1     | golgi glycoprotein 1                                                  |
| GLI1     | GLI family zinc finger 1                                              |
| GLI4     | GLI family zinc finger 4                                              |
| GLIPR1L2 | GLI pathogenesis-related 1 like 2                                     |
| GLOD4    | glyoxalase domain containing 4                                        |
| GLS      | glutaminase                                                           |
| GLS2     | glutaminase 2 (liver, mitochondrial)                                  |
| GLTPD2   | glycolipid transfer protein domain containing 2                       |
| GLTSCR2  | glioma tumor suppressor candidate region gene 2                       |
| GLUD1    | glutamate dehydrogenase 1                                             |
| GLYCTK   | glycerate kinase                                                      |

|         |                                                                                                       |
|---------|-------------------------------------------------------------------------------------------------------|
| GMCL1   | germ cell-less, spermatogenesis associated 1                                                          |
| GMEB1   | glucocorticoid modulatory element binding protein 1                                                   |
| GMEB2   | glucocorticoid modulatory element binding protein 2                                                   |
| GMFB    | glia maturation factor, beta                                                                          |
| GMIP    | GEM interacting protein                                                                               |
| GMNN    | geminin, DNA replication inhibitor                                                                    |
| GMPPB   | GDP-mannose pyrophosphorylase B                                                                       |
| GMPR2   | guanosine monophosphate reductase 2                                                                   |
| GNA13   | guanine nucleotide binding protein (G protein), alpha 13                                              |
| GNAI2   | guanine nucleotide binding protein (G protein), alpha inhibiting activity polypeptide 2               |
| GNAI3   | guanine nucleotide binding protein (G protein), alpha inhibiting activity polypeptide 3               |
| GNAL    | guanine nucleotide binding protein (G protein), alpha activating activity polypeptide, olfactory type |
| GNB1L   | guanine nucleotide binding protein (G protein), beta polypeptide 1-like                               |
| GNB2    | guanine nucleotide binding protein (G protein), beta polypeptide 2                                    |
| GNB2L1  | guanine nucleotide binding protein (G protein), beta polypeptide 2-like 1                             |
| GNG2    | guanine nucleotide binding protein (G protein), gamma 2                                               |
| GNG3    | guanine nucleotide binding protein (G protein), gamma 3                                               |
| GNG5    | guanine nucleotide binding protein (G protein), gamma 5                                               |
| GNGT2   | guanine nucleotide binding protein (G protein), gamma transducing activity polypeptide 2              |
| GNL2    | guanine nucleotide binding protein-like 2 (nucleolar)                                                 |
| GNL3    | guanine nucleotide binding protein-like 3 (nucleolar)                                                 |
| GNL3L   | guanine nucleotide binding protein-like 3 (nucleolar)-like                                            |
| GNPAT   | glyceronephosphate O-acyltransferase                                                                  |
| GNRHR2  | gonadotropin-releasing hormone (type 2) receptor 2, pseudogene                                        |
| GOLGA1  | golgin A1                                                                                             |
| GOLGA3  | golgin A3                                                                                             |
| GOLGA4  | golgin A4                                                                                             |
| GOLGA5  | golgin A5                                                                                             |
| GOLGB1  | golgin B1                                                                                             |
| GOLIM4  | golgi integral membrane protein 4                                                                     |
| GOLPH3  | golgi phosphoprotein 3 (coat-protein)                                                                 |
| GOLT1B  | golgi transport 1B                                                                                    |
| GORAB   | golgin, RAB6-interacting                                                                              |
| GORASP1 | golgi reassembly stacking protein 1, 65kDa                                                            |
| GORASP2 | golgi reassembly stacking protein 2, 55kDa                                                            |
| GOSR2   | golgi SNAP receptor complex member 2                                                                  |
| GOT2    | glutamic-oxaloacetic transaminase 2, mitochondrial                                                    |
| GP1BA   | glycoprotein Ib (platelet), alpha polypeptide                                                         |

|          |                                                                               |
|----------|-------------------------------------------------------------------------------|
| GP9      | glycoprotein IX (platelet)                                                    |
| GPAA1    | glycosylphosphatidylinositol anchor attachment 1                              |
| GPALPP1  | GPALPP motifs containing 1                                                    |
| GPAM     | glycerol-3-phosphate acyltransferase, mitochondrial                           |
| GPATCH11 | G patch domain containing 11                                                  |
| GPATCH2L | G patch domain containing 2-like                                              |
| GPATCH3  | G patch domain containing 3                                                   |
| GPATCH4  | G patch domain containing 4                                                   |
| GPATCH8  | G patch domain containing 8                                                   |
| GPBP1    | GC-rich promoter binding protein 1                                            |
| GPBP1L1  | GC-rich promoter binding protein 1-like 1                                     |
| GPCPD1   | glycerophosphocholine phosphodiesterase GDE1 homolog ( <i>S. cerevisiae</i> ) |
| GPD2     | glycerol-3-phosphate dehydrogenase 2 (mitochondrial)                          |
| GPBR1    | G protein-coupled estrogen receptor 1                                         |
| GPHN     | gephyrin                                                                      |
| GPN1     | GPN-loop GTPase 1                                                             |
| GPN2     | GPN-loop GTPase 2                                                             |
| GPN3     | GPN-loop GTPase 3                                                             |
| GPR107   | G protein-coupled receptor 107                                                |
| GPR108   | G protein-coupled receptor 108                                                |
| GPR132   | G protein-coupled receptor 132                                                |
| GPR137   | G protein-coupled receptor 137                                                |
| GPR15    | G protein-coupled receptor 15                                                 |
| GPR155   | G protein-coupled receptor 155                                                |
| GPR171   | G protein-coupled receptor 171                                                |
| GPR18    | G protein-coupled receptor 18                                                 |
| GPR180   | G protein-coupled receptor 180                                                |
| GPR183   | G protein-coupled receptor 183                                                |
| GPR19    | G protein-coupled receptor 19                                                 |
| GPR55    | G protein-coupled receptor 55                                                 |
| GPS2     | G protein pathway suppressor 2                                                |
| GPX1     | glutathione peroxidase 1                                                      |
| GPX3     | glutathione peroxidase 3                                                      |
| GPX4     | glutathione peroxidase 4                                                      |
| GRAMD1A  | GRAM domain containing 1A                                                     |
| GRAMD1C  | GRAM domain containing 1C                                                     |
| GRAMD2   | GRAM domain containing 2                                                      |
| GRB2     | growth factor receptor-bound protein 2                                        |
| GRIPAP1  | GRIP1 associated protein 1                                                    |
| GRK4     | G protein-coupled receptor kinase 4                                           |
| GRK5     | G protein-coupled receptor kinase 5                                           |



|           |                                                               |
|-----------|---------------------------------------------------------------|
| GRK6      | G protein-coupled receptor kinase 6                           |
| GRN       | granulin                                                      |
| GRPEL2    | GrpE-like 2, mitochondrial (E. coli)                          |
| GRSF1     | G-rich RNA sequence binding factor 1                          |
| GRWD1     | glutamate-rich WD repeat containing 1                         |
| GSAP      | gamma-secretase activating protein                            |
| GSDMB     | gasdermin B                                                   |
| GSDMD     | gasdermin D                                                   |
| GSE1      | Gse1 coiled-coil protein                                      |
| GSG2      | germ cell associated 2 (haspin)                               |
| GSK3A     | glycogen synthase kinase 3 alpha                              |
| GSK3B     | glycogen synthase kinase 3 beta                               |
| GSS       | glutathione synthetase                                        |
| GSTA4     | glutathione S-transferase alpha 4                             |
| GSTCD     | glutathione S-transferase, C-terminal domain containing       |
| GSTK1     | glutathione S-transferase kappa 1                             |
| GSTO1     | glutathione S-transferase omega 1                             |
| GSTO2     | glutathione S-transferase omega 2                             |
| GSTT1     | glutathione S-transferase theta 1                             |
| GTF2A1    | general transcription factor IIA, 1, 19/37kDa                 |
| GTF2A2    | general transcription factor IIA, 2, 12kDa                    |
| GTF2E1    | general transcription factor IIE, polypeptide 1, alpha 56kDa  |
| GTF2E2    | general transcription factor IIE, polypeptide 2, beta 34kDa   |
| GTF2H1    | general transcription factor IIH, polypeptide 1, 62kDa        |
| GTF2H3    | general transcription factor IIH, polypeptide 3, 34kDa        |
| GTF2I     | general transcription factor Iii                              |
| GTF3A     | general transcription factor IIIA                             |
| GTF3C2    | general transcription factor IIIC, polypeptide 2, beta 110kDa |
| GTF3C3    | general transcription factor IIIC, polypeptide 3, 102kDa      |
| GTF3C4    | general transcription factor IIIC, polypeptide 4, 90kDa       |
| GTF3C5    | general transcription factor IIIC, polypeptide 5, 63kDa       |
| GTF3C6    | general transcription factor IIIC, polypeptide 6, alpha 35kDa |
| GTPBP10   | GTP-binding protein 10 (putative)                             |
| GTPBP2    | GTP binding protein 2                                         |
| GTPBP3    | GTP binding protein 3 (mitochondrial)                         |
| GTPBP4    | GTP binding protein 4                                         |
| GTPBP8    | GTP-binding protein 8 (putative)                              |
| GTSE1     | G-2 and S-phase expressed 1                                   |
| GTSE1-AS1 | GTSE1 antisense RNA 1 (head to head)                          |
| GUCD1     | guanylyl cyclase domain containing 1                          |
| GUF1      | GUF1 GTPase homolog (S. cerevisiae)                           |

|          |                                                                                                                  |
|----------|------------------------------------------------------------------------------------------------------------------|
| GUSB     | glucuronidase, beta                                                                                              |
| GUSBP11  | glucuronidase, beta pseudogene 11                                                                                |
| GUSBP5   | glucuronidase, beta pseudogene 5                                                                                 |
| GYPC     | glycophorin C (Gerbich blood group)                                                                              |
| GYS1     | glycogen synthase 1 (muscle)                                                                                     |
| H1FX     | H1 histone family, member X                                                                                      |
| H1FX-AS1 | H1FX antisense RNA 1                                                                                             |
| H2AFJ    | H2A histone family, member J                                                                                     |
| H2AFV    | H2A histone family, member V                                                                                     |
| H2AFX    | H2A histone family, member X                                                                                     |
| H2AFZ    | H2A histone family, member Z                                                                                     |
| H3F3A    | H3 histone, family 3A                                                                                            |
| H3F3AP4  | H3 histone, family 3A, pseudogene 4                                                                              |
| H3F3B    | H3 histone, family 3B (H3.3B)                                                                                    |
| H6PD     | hexose-6-phosphate dehydrogenase (glucose 1-dehydrogenase)                                                       |
| HACD2    | 3-hydroxyacyl-CoA dehydratase 2                                                                                  |
| HACL1    | 2-hydroxyacyl-CoA lyase 1                                                                                        |
| HADH     | hydroxyacyl-CoA dehydrogenase                                                                                    |
| HADHA    | hydroxyacyl-CoA dehydrogenase/3-ketoacyl-CoA thiolase/enoyl-CoA hydratase (trifunctional protein), alpha subunit |
| HADHB    | hydroxyacyl-CoA dehydrogenase/3-ketoacyl-CoA thiolase/enoyl-CoA hydratase (trifunctional protein), beta subunit  |
| HAGH     | hydroxyacylglutathione hydrolase                                                                                 |
| HAGHL    | hydroxyacylglutathione hydrolase-like                                                                            |
| HAMP     | hepcidin antimicrobial peptide                                                                                   |
| HARS     | histidyl-tRNA synthetase                                                                                         |
| HARS2    | histidyl-tRNA synthetase 2, mitochondrial                                                                        |
| HAUS4    | HAUS augmin-like complex, subunit 4                                                                              |
| HAUS5    | HAUS augmin-like complex, subunit 5                                                                              |
| HAUS6    | HAUS augmin-like complex, subunit 6                                                                              |
| HAUS8    | HAUS augmin-like complex, subunit 8                                                                              |
| HAX1     | HCLS1 associated protein X-1                                                                                     |
| HBP1     | HMG-box transcription factor 1                                                                                   |
| HBQ1     | hemoglobin, theta 1                                                                                              |
| HBS1L    | HBS1-like translational GTPase                                                                                   |
| HCFC1    | host cell factor C1                                                                                              |
| HCG11    | HLA complex group 11 (non-protein coding)                                                                        |
| HCG25    | HLA complex group 25 (non-protein coding)                                                                        |
| HCG26    | HLA complex group 26 (non-protein coding)                                                                        |
| HCLS1    | hematopoietic cell-specific Lyn substrate 1                                                                      |
| HCRT     | hypocretin (orexin) neuropeptide precursor                                                                       |
| HCST     | hematopoietic cell signal transducer                                                                             |

|          |                                                                                                |
|----------|------------------------------------------------------------------------------------------------|
| HDAC1    | histone deacetylase 1                                                                          |
| HDAC10   | histone deacetylase 10                                                                         |
| HDAC2    | histone deacetylase 2                                                                          |
| HDAC4    | histone deacetylase 4                                                                          |
| HDDC3    | HD domain containing 3                                                                         |
| HDGF     | hepatoma-derived growth factor                                                                 |
| HDHD1    | haloacid dehalogenase-like hydrolase domain containing 1                                       |
| HDHD2    | haloacid dehalogenase-like hydrolase domain containing 2                                       |
| HDLBP    | high density lipoprotein binding protein                                                       |
| HEATR1   | HEAT repeat containing 1                                                                       |
| HEATR5A  | HEAT repeat containing 5A                                                                      |
| HEATR5B  | HEAT repeat containing 5B                                                                      |
| HECTD1   | HECT domain containing E3 ubiquitin protein ligase 1                                           |
| HELLS    | helicase, lymphoid-specific                                                                    |
| HELQ     | helicase, POLQ-like                                                                            |
| HEMK1    | HemK methyltransferase family member 1                                                         |
| HERC1    | HECT and RLD domain containing E3 ubiquitin protein ligase family member 1                     |
| HERC4    | HECT and RLD domain containing E3 ubiquitin protein ligase 4                                   |
| HERC5    | HECT and RLD domain containing E3 ubiquitin protein ligase 5                                   |
| HERC6    | HECT and RLD domain containing E3 ubiquitin protein ligase family member 6                     |
| HERPUD1  | homocysteine-inducible, endoplasmic reticulum stress-inducible, ubiquitin-like domain member 1 |
| HES1     | hes family bHLH transcription factor 1                                                         |
| HEXA     | hexosaminidase A (alpha polypeptide)                                                           |
| HEXA-AS1 | HEXA antisense RNA 1                                                                           |
| HEXIM1   | hexamethylene bis-acetamide inducible 1                                                        |
| HEXIM2   | hexamethylene bis-acetamide inducible 2                                                        |
| HHLA3    | HERV-H LTR-associating 3                                                                       |
| HIAT1    | hippocampus abundant transcript 1                                                              |
| HIBADH   | 3-hydroxyisobutyrate dehydrogenase                                                             |
| HIC1     | hypermethylated in cancer 1                                                                    |
| HIF1A    | hypoxia inducible factor 1, alpha subunit (basic helix-loop-helix transcription factor)        |
| HIF1AN   | hypoxia inducible factor 1, alpha subunit inhibitor                                            |
| HIGD1B   | HIG1 hypoxia inducible domain family, member 1B                                                |
| HIGD2A   | HIG1 hypoxia inducible domain family, member 2A                                                |
| HILPDA   | hypoxia inducible lipid droplet-associated                                                     |
| HINT1    | histidine triad nucleotide binding protein 1                                                   |
| HINT2    | histidine triad nucleotide binding protein 2                                                   |
| HINT3    | histidine triad nucleotide binding protein 3                                                   |
| HIPK1    | homeodomain interacting protein kinase 1                                                       |
| HIPK3    | homeodomain interacting protein kinase 3                                                       |

|           |                              |
|-----------|------------------------------|
| HIRA      | histone cell cycle regulator |
| HIRIP3    | HIRA interacting protein 3   |
| HIST1H1B  | histone cluster 1, H1b       |
| HIST1H1C  | histone cluster 1, H1c       |
| HIST1H1D  | histone cluster 1, H1d       |
| HIST1H1E  | histone cluster 1, H1e       |
| HIST1H2AB | histone cluster 1, H2ab      |
| HIST1H2AC | histone cluster 1, H2ac      |
| HIST1H2AD | histone cluster 1, H2ad      |
| HIST1H2AE | histone cluster 1, H2ae      |
| HIST1H2AG | histone cluster 1, H2ag      |
| HIST1H2AH | histone cluster 1, H2ah      |
| HIST1H2AI | histone cluster 1, H2ai      |
| HIST1H2AJ | histone cluster 1, H2aj      |
| HIST1H2AK | histone cluster 1, H2ak      |
| HIST1H2AL | histone cluster 1, H2al      |
| HIST1H2AM | histone cluster 1, H2am      |
| HIST1H2BB | histone cluster 1, H2bb      |
| HIST1H2BC | histone cluster 1, H2bc      |
| HIST1H2BD | histone cluster 1, H2bd      |
| HIST1H2BE | histone cluster 1, H2be      |
| HIST1H2BF | histone cluster 1, H2bf      |
| HIST1H2BG | histone cluster 1, H2bg      |
| HIST1H2BH | histone cluster 1, H2bh      |
| HIST1H2BI | histone cluster 1, H2bi      |
| HIST1H2BJ | histone cluster 1, H2bj      |
| HIST1H2BK | histone cluster 1, H2bk      |
| HIST1H2BL | histone cluster 1, H2bl      |
| HIST1H2BM | histone cluster 1, H2bm      |
| HIST1H2BN | histone cluster 1, H2bn      |
| HIST1H2BO | histone cluster 1, H2bo      |
| HIST1H3A  | histone cluster 1, H3a       |
| HIST1H3B  | histone cluster 1, H3b       |
| HIST1H3C  | histone cluster 1, H3c       |
| HIST1H3D  | histone cluster 1, H3d       |
| HIST1H3F  | histone cluster 1, H3f       |
| HIST1H3G  | histone cluster 1, H3g       |
| HIST1H3H  | histone cluster 1, H3h       |
| HIST1H3I  | histone cluster 1, H3i       |
| HIST1H3J  | histone cluster 1, H3j       |
| HIST1H4A  | histone cluster 1, H4a       |

|           |                                                                |
|-----------|----------------------------------------------------------------|
| HIST1H4B  | histone cluster 1, H4b                                         |
| HIST1H4C  | histone cluster 1, H4c                                         |
| HIST1H4D  | histone cluster 1, H4d                                         |
| HIST1H4E  | histone cluster 1, H4e                                         |
| HIST1H4F  | histone cluster 1, H4f                                         |
| HIST1H4H  | histone cluster 1, H4h                                         |
| HIST1H4I  | histone cluster 1, H4i                                         |
| HIST1H4J  | histone cluster 1, H4j                                         |
| HIST1H4K  | histone cluster 1, H4k                                         |
| HIST1H4L  | histone cluster 1, H4l                                         |
| HIST2H2AB | histone cluster 2, H2ab                                        |
| HIST2H2AC | histone cluster 2, H2ac                                        |
| HIST2H2BE | histone cluster 2, H2be                                        |
| HIST2H2BF | histone cluster 2, H2bf                                        |
| HIST2H3D  | histone cluster 2, H3d                                         |
| HIST3H2A  | histone cluster 3, H2a                                         |
| HIST3H2BB | histone cluster 3, H2bb                                        |
| HIST4H4   | histone cluster 4, H4                                          |
| HIVEP1    | human immunodeficiency virus type I enhancer binding protein 1 |
| HIVEP2    | human immunodeficiency virus type I enhancer binding protein 2 |
| HKR1      | HKR1, GLI-Kruppel zinc finger family member                    |
| HLA-DQA1  | major histocompatibility complex, class II, DQ alpha 1         |
| HLA-DRB5  | major histocompatibility complex, class II, DR beta 5          |
| HLA-E     | major histocompatibility complex, class I, E                   |
| HLA-H     | major histocompatibility complex, class I, H (pseudogene)      |
| HMBOX1    | homeobox containing 1                                          |
| HMBS      | hydroxymethylbilane synthase                                   |
| HMCE5     | 5-hydroxymethylcytosine (hmC) binding, ES cell-specific        |
| HMGA1     | high mobility group AT-hook 1                                  |
| HMGB1     | high mobility group box 1                                      |
| HMGB2     | high mobility group box 2                                      |
| HMGCL     | 3-hydroxymethyl-3-methylglutaryl-CoA lyase                     |
| HMGCR     | 3-hydroxy-3-methylglutaryl-CoA reductase                       |
| HMGN2     | high mobility group nucleosomal binding domain 2               |
| HMGN3     | high mobility group nucleosomal binding domain 3               |
| HMGN4     | high mobility group nucleosomal binding domain 4               |
| HMGXB3    | HMG box domain containing 3                                    |
| HMHA1     | histocompatibility (minor) HA-1                                |
| HMMR      | hyaluronan-mediated motility receptor (RHAMM)                  |
| HMOX2     | heme oxygenase 2                                               |
| HMSD      | histocompatibility (minor) serpin domain containing            |

|                |                                                                                          |
|----------------|------------------------------------------------------------------------------------------|
| HN1            | hematological and neurological expressed 1                                               |
| HN1L           | hematological and neurological expressed 1-like                                          |
| HNRNPA0        | heterogeneous nuclear ribonucleoprotein A0                                               |
| HNRNPA1        | heterogeneous nuclear ribonucleoprotein A1                                               |
| HNRNPA1L2      | heterogeneous nuclear ribonucleoprotein A1-like 2                                        |
| HNRNPA1P10     | heterogeneous nuclear ribonucleoprotein A1 pseudogene 10                                 |
| HNRNPA2B1      | heterogeneous nuclear ribonucleoprotein A2/B1                                            |
| HNRNPA3        | heterogeneous nuclear ribonucleoprotein A3                                               |
| HNRNPAB        | heterogeneous nuclear ribonucleoprotein A/B                                              |
| HNRNPC         | heterogeneous nuclear ribonucleoprotein C (C1/C2)                                        |
| HNRNPD         | heterogeneous nuclear ribonucleoprotein D (AU-rich element RNA binding protein 1, 37kDa) |
| HNRNPDL        | heterogeneous nuclear ribonucleoprotein D-like                                           |
| HNRNPF         | heterogeneous nuclear ribonucleoprotein F                                                |
| HNRNPH1        | heterogeneous nuclear ribonucleoprotein H1 (H)                                           |
| HNRNPH3        | heterogeneous nuclear ribonucleoprotein H3 (2H9)                                         |
| HNRNPK         | heterogeneous nuclear ribonucleoprotein K                                                |
| HNRNPL         | heterogeneous nuclear ribonucleoprotein L                                                |
| HNRNPLL        | heterogeneous nuclear ribonucleoprotein L-like                                           |
| HNRNPR         | heterogeneous nuclear ribonucleoprotein R                                                |
| HNRNPU         | heterogeneous nuclear ribonucleoprotein U (scaffold attachment factor A)                 |
| HNRNPU-AS1     | HNRNPU antisense RNA 1                                                                   |
| HNRNPUL1       | heterogeneous nuclear ribonucleoprotein U-like 1                                         |
| HNRNPUL2       | heterogeneous nuclear ribonucleoprotein U-like 2                                         |
| HNRNPUL2-BSCL2 | HNRNPUL2-BSCL2 readthrough (NMD candidate)                                               |
| HOMER1         | homer scaffolding protein 1                                                              |
| HOOK2          | hook microtubule-tethering protein 2                                                     |
| HOXC4          | homeobox C4                                                                              |
| HOXC5          | homeobox C5                                                                              |
| HOXC6          | homeobox C6                                                                              |
| HPD            | 4-hydroxyphenylpyruvate dioxygenase                                                      |
| HPDL           | 4-hydroxyphenylpyruvate dioxygenase-like                                                 |
| HPS4           | Hermansky-Pudlak syndrome 4                                                              |
| HPS5           | Hermansky-Pudlak syndrome 5                                                              |
| HPSE2          | heparanase 2 (inactive)                                                                  |
| HRAS           | Harvey rat sarcoma viral oncogene homolog                                                |
| HS1BP3         | HCLS1 binding protein 3                                                                  |
| HS2ST1         | heparan sulfate 2-O-sulfotransferase 1                                                   |
| HSBP1L1        | heat shock factor binding protein 1-like 1                                               |
| HSD11B1L       | hydroxysteroid (11-beta) dehydrogenase 1-like                                            |
| HSD17B11       | hydroxysteroid (17-beta) dehydrogenase 11                                                |

|            |                                                                              |
|------------|------------------------------------------------------------------------------|
| HSD17B12   | hydroxysteroid (17-beta) dehydrogenase 12                                    |
| HSD3B7     | hydroxy-delta-5-steroid dehydrogenase, 3 beta- and steroid delta-isomerase 7 |
| HSDL2      | hydroxysteroid dehydrogenase like 2                                          |
| HSF1       | heat shock transcription factor 1                                            |
| HSF2BP     | heat shock transcription factor 2 binding protein                            |
| HSF4       | heat shock transcription factor 4                                            |
| HSH2D      | hematopoietic SH2 domain containing                                          |
| HSP90AB1   | heat shock protein 90kDa alpha (cytosolic), class B member 1                 |
| HSP90B1    | heat shock protein 90kDa beta (Grp94), member 1                              |
| HSPA12B    | heat shock 70kD protein 12B                                                  |
| HSPA2      | heat shock 70kDa protein 2                                                   |
| HSPA4      | heat shock 70kDa protein 4                                                   |
| HSPA4L     | heat shock 70kDa protein 4-like                                              |
| HSPA5      | heat shock 70kDa protein 5 (glucose-regulated protein, 78kDa)                |
| HSPA8      | heat shock 70kDa protein 8                                                   |
| HSPA9      | heat shock 70kDa protein 9 (mortalin)                                        |
| HSPB1      | heat shock 27kDa protein 1                                                   |
| HSPB11     | heat shock protein family B (small), member 11                               |
| HSPB6      | heat shock protein, alpha-crystallin-related, B6                             |
| HSPBAP1    | HSPB (heat shock 27kDa) associated protein 1                                 |
| HSPD1      | heat shock 60kDa protein 1 (chaperonin)                                      |
| HSPE1      | heat shock 10kDa protein 1                                                   |
| HSPE1-MOB4 | HSPE1-MOB4 readthrough                                                       |
| HTR1A      | 5-hydroxytryptamine (serotonin) receptor 1A, G protein-coupled               |
| HTR5A      | 5-hydroxytryptamine (serotonin) receptor 5A, G protein-coupled               |
| HTRA2      | HtrA serine peptidase 2                                                      |
| HTRA4      | HtrA serine peptidase 4                                                      |
| HTT        | huntingtin                                                                   |
| HTT-AS     | HTT antisense RNA (head to head)                                             |
| HUS1       | HUS1 checkpoint homolog ( <i>S. pombe</i> )                                  |
| HUWE1      | HECT, UBA and WWE domain containing 1, E3 ubiquitin protein ligase           |
| HYAL3      | hyaluronoglucosaminidase 3                                                   |
| HYI        | hydroxypyruvate isomerase (putative)                                         |
| HYOU1      | hypoxia up-regulated 1                                                       |
| HYPK       | huntingtin interacting protein K                                             |
| IAH1       | isoamyl acetate-hydrolyzing esterase 1 homolog ( <i>S. cerevisiae</i> )      |
| IARS       | isoleucyl-tRNA synthetase                                                    |
| IBA57      | IBA57, iron-sulfur cluster assembly homolog ( <i>S. cerevisiae</i> )         |
| IBTK       | inhibitor of Bruton agammaglobulinemia tyrosine kinase                       |
| ICAM1      | intercellular adhesion molecule 1                                            |
| ICAM2      | intercellular adhesion molecule 2                                            |

|          |                                                                            |
|----------|----------------------------------------------------------------------------|
| ICAM4    | intercellular adhesion molecule 4 (Landsteiner-Wiener blood group)         |
| ICE1     | interactor of little elongation complex ELL subunit 1                      |
| ICE2     | interactor of little elongation complex ELL subunit 2                      |
| ICK      | intestinal cell (MAK-like) kinase                                          |
| ICOSLG   | inducible T-cell co-stimulator ligand                                      |
| ICT1     | immature colon carcinoma transcript 1                                      |
| ID2      | inhibitor of DNA binding 2, dominant negative helix-loop-helix protein     |
| ID3      | inhibitor of DNA binding 3, dominant negative helix-loop-helix protein     |
| IDE      | insulin-degrading enzyme                                                   |
| IDH3A    | isocitrate dehydrogenase 3 (NAD+) alpha                                    |
| IDH3B    | isocitrate dehydrogenase 3 (NAD+) beta                                     |
| IDI1     | isopentenyl-diphosphate delta isomerase 1                                  |
| IDI2-AS1 | IDI2 antisense RNA 1                                                       |
| IER2     | immediate early response 2                                                 |
| IER3     | immediate early response 3                                                 |
| IER3IP1  | immediate early response 3 interacting protein 1                           |
| IER5     | immediate early response 5                                                 |
| IFI16    | interferon, gamma-inducible protein 16                                     |
| IFI30    | interferon, gamma-inducible protein 30                                     |
| IFIH1    | interferon induced with helicase C domain 1                                |
| IFITM1   | interferon induced transmembrane protein 1                                 |
| IFNAR1   | interferon (alpha, beta and omega) receptor 1                              |
| IFNAR2   | interferon (alpha, beta and omega) receptor 2                              |
| IFNGR1   | interferon gamma receptor 1                                                |
| IFRD2    | interferon-related developmental regulator 2                               |
| IFT172   | intraflagellar transport 172                                               |
| IFT22    | intraflagellar transport 22                                                |
| IFT46    | intraflagellar transport 46                                                |
| IFT52    | intraflagellar transport 52                                                |
| IFT74    | intraflagellar transport 74                                                |
| IFT80    | intraflagellar transport 80                                                |
| IGDCC4   | immunoglobulin superfamily, DCC subclass, member 4                         |
| IGF2BP3  | insulin-like growth factor 2 mRNA binding protein 3                        |
| IGF2R    | insulin-like growth factor 2 receptor                                      |
| IGFLR1   | IGF-like family receptor 1                                                 |
| IGHMBP2  | immunoglobulin mu binding protein 2                                        |
| IK       | IK cytokine, down-regulator of HLA II                                      |
| IKBIP    | IKBKB interacting protein                                                  |
| IKBKB    | inhibitor of kappa light polypeptide gene enhancer in B-cells, kinase beta |
| IKZF1    | IKAROS family zinc finger 1 (Ikaros)                                       |
| IKZF2    | IKAROS family zinc finger 2 (Helios)                                       |



|             |                                                                           |
|-------------|---------------------------------------------------------------------------|
| IKZF3       | IKAROS family zinc finger 3 (Aiolos)                                      |
| IL10RA      | interleukin 10 receptor, alpha                                            |
| IL10RB      | interleukin 10 receptor, beta                                             |
| IL11RA      | interleukin 11 receptor, alpha                                            |
| IL12RB1     | interleukin 12 receptor, beta 1                                           |
| IL18BP      | interleukin 18 binding protein                                            |
| IL21R       | interleukin 21 receptor                                                   |
| IL22RA2     | interleukin 22 receptor, alpha 2                                          |
| IL23R       | interleukin 23 receptor                                                   |
| IL2RB       | interleukin 2 receptor, beta                                              |
| IL2RG       | interleukin 2 receptor, gamma                                             |
| IL4I1       | interleukin 4 induced 1                                                   |
| IL6ST       | interleukin 6 signal transducer                                           |
| IL7         | interleukin 7                                                             |
| ILDR1       | immunoglobulin-like domain containing receptor 1                          |
| ILF2        | interleukin enhancer binding factor 2                                     |
| ILF3        | interleukin enhancer binding factor 3, 90kDa                              |
| ILK         | integrin-linked kinase                                                    |
| IMMP1L      | IMP1 inner mitochondrial membrane peptidase-like ( <i>S. cerevisiae</i> ) |
| IMMT        | inner membrane protein, mitochondrial                                     |
| IMP3        | IMP3, U3 small nucleolar ribonucleoprotein                                |
| IMP4        | IMP4, U3 small nucleolar ribonucleoprotein                                |
| IMPA1       | inositol(myo)-1(or 4)-monophosphatase 1                                   |
| IMPDH2      | IMP (inosine 5'-monophosphate) dehydrogenase 2                            |
| INAFM1      | InaF-motif containing 1                                                   |
| ING1        | inhibitor of growth family, member 1                                      |
| ING3        | inhibitor of growth family, member 3                                      |
| ING4        | inhibitor of growth family, member 4                                      |
| ING5        | inhibitor of growth family, member 5                                      |
| INO80B      | INO80 complex subunit B                                                   |
| INO80B-WBP1 | INO80B-WBP1 readthrough (NMD candidate)                                   |
| INO80C      | INO80 complex subunit C                                                   |
| INO80D      | INO80 complex subunit D                                                   |
| INO80E      | INO80 complex subunit E                                                   |
| INPP5D      | inositol polyphosphate-5-phosphatase, 145kDa                              |
| INPP5E      | inositol polyphosphate-5-phosphatase, 72 kDa                              |
| INPP5F      | inositol polyphosphate-5-phosphatase F                                    |
| INPP5K      | inositol polyphosphate-5-phosphatase K                                    |
| INSIG1      | insulin induced gene 1                                                    |
| INSM2       | insulinoma-associated 2                                                   |
| INTS1       | integrator complex subunit 1                                              |

|          |                                                              |
|----------|--------------------------------------------------------------|
| INTS10   | integrator complex subunit 10                                |
| INTS12   | integrator complex subunit 12                                |
| INTS2    | integrator complex subunit 2                                 |
| INTS4    | integrator complex subunit 4                                 |
| INTS5    | integrator complex subunit 5                                 |
| INTS6    | integrator complex subunit 6                                 |
| INTS7    | integrator complex subunit 7                                 |
| INTS9    | integrator complex subunit 9                                 |
| IP6K1    | inositol hexakisphosphate kinase 1                           |
| IPCEF1   | interaction protein for cytohesin exchange factors 1         |
| IPMK     | inositol polyphosphate multikinase                           |
| IPO13    | importin 13                                                  |
| IPO4     | importin 4                                                   |
| IPO7     | importin 7                                                   |
| IPO9     | importin 9                                                   |
| IPP      | intracisternal A particle-promoted polypeptide               |
| IPPK     | inositol 1,3,4,5,6-pentakisphosphate 2-kinase                |
| IQCB1    | IQ motif containing B1                                       |
| IQCC     | IQ motif containing C                                        |
| IQCD     | IQ motif containing D                                        |
| IQCE     | IQ motif containing E                                        |
| IQCH     | IQ motif containing H                                        |
| IQGAP2   | IQ motif containing GTPase activating protein 2              |
| IRAK1    | interleukin-1 receptor-associated kinase 1                   |
| IRAK1BP1 | interleukin-1 receptor-associated kinase 1 binding protein 1 |
| IRAK4    | interleukin-1 receptor-associated kinase 4                   |
| IREB2    | iron-responsive element binding protein 2                    |
| IRF1     | interferon regulatory factor 1                               |
| IRF2     | interferon regulatory factor 2                               |
| IRF2BP1  | interferon regulatory factor 2 binding protein 1             |
| IRF2BP2  | interferon regulatory factor 2 binding protein 2             |
| IRF2BPL  | interferon regulatory factor 2 binding protein-like          |
| IRF3     | interferon regulatory factor 3                               |
| IRF4     | interferon regulatory factor 4                               |
| IRF5     | interferon regulatory factor 5                               |
| IRF7     | interferon regulatory factor 7                               |
| IRF8     | interferon regulatory factor 8                               |
| IRF9     | interferon regulatory factor 9                               |
| IRGM     | immunity-related GTPase family, M                            |
| IRGQ     | immunity-related GTPase family, Q                            |
| ISCU     | iron-sulfur cluster assembly enzyme                          |

|            |                                                                                                       |
|------------|-------------------------------------------------------------------------------------------------------|
| ISG15      | ISG15 ubiquitin-like modifier                                                                         |
| ISG20      | interferon stimulated exonuclease gene 20kDa                                                          |
| ISG20L2    | interferon stimulated exonuclease gene 20kDa-like 2                                                   |
| ISOC1      | isochorismatase domain containing 1                                                                   |
| IST1       | increased sodium tolerance 1 homolog (yeast)                                                          |
| ISY1       | ISY1 splicing factor homolog ( <i>S. cerevisiae</i> )                                                 |
| ISY1-RAB43 | ISY1-RAB43 readthrough                                                                                |
| ISYNA1     | inositol-3-phosphate synthase 1                                                                       |
| ITFG2      | integrin alpha FG-GAP repeat containing 2                                                             |
| ITFG3      | integrin alpha FG-GAP repeat containing 3                                                             |
| ITGA4      | integrin, alpha 4 (antigen CD49D, alpha 4 subunit of VLA-4 receptor)                                  |
| ITGAL      | integrin, alpha L (antigen CD11A (p180), lymphocyte function-associated antigen 1; alpha polypeptide) |
| ITGAV      | integrin, alpha V                                                                                     |
| ITGAX      | integrin, alpha X (complement component 3 receptor 4 subunit)                                         |
| ITGB1      | integrin, beta 1 (fibronectin receptor, beta polypeptide, antigen CD29 includes MDF2, MSK12)          |
| ITGB1BP1   | integrin beta 1 binding protein 1                                                                     |
| ITGB1BP2   | integrin beta 1 binding protein (melusin) 2                                                           |
| ITGB3      | integrin, beta 3 (platelet glycoprotein IIIa, antigen CD61)                                           |
| ITGB3BP    | integrin beta 3 binding protein (beta3-endonexin)                                                     |
| ITGB7      | integrin, beta 7                                                                                      |
| ITGB8      | integrin, beta 8                                                                                      |
| ITPA       | inosine triphosphatase (nucleoside triphosphate pyrophosphatase)                                      |
| ITPK1-AS1  | ITPK1 antisense RNA 1                                                                                 |
| ITPKB      | inositol-trisphosphate 3-kinase B                                                                     |
| ITPKC      | inositol-trisphosphate 3-kinase C                                                                     |
| ITPR1      | inositol 1,4,5-trisphosphate receptor, type 1                                                         |
| ITPR2      | inositol 1,4,5-trisphosphate receptor, type 2                                                         |
| ITPR3      | inositol 1,4,5-trisphosphate receptor, type 3                                                         |
| ITPRIPL1   | inositol 1,4,5-trisphosphate receptor interacting protein-like 1                                      |
| ITSN2      | intersectin 2                                                                                         |
| IVL        | involucrin                                                                                            |
| IVNS1ABP   | influenza virus NS1A binding protein                                                                  |
| IWS1       | IWS1 homolog ( <i>S. cerevisiae</i> )                                                                 |
| IYD        | iodotyrosine deiodinase                                                                               |
| IZUMO4     | IZUMO family member 4                                                                                 |
| JADE1      | jade family PHD finger 1                                                                              |
| JADE2      | jade family PHD finger 2                                                                              |
| JAGN1      | jagunal homolog 1 ( <i>Drosophila</i> )                                                               |
| JAK2       | Janus kinase 2                                                                                        |
| JAK3       | Janus kinase 3                                                                                        |

|               |                                                                                                 |
|---------------|-------------------------------------------------------------------------------------------------|
| JMJD1C        | jumonji domain containing 1C                                                                    |
| JMJD4         | jumonji domain containing 4                                                                     |
| JMJD6         | jumonji domain containing 6                                                                     |
| JMJD7         | jumonji domain containing 7                                                                     |
| JMJD7-PLA2G4B | JMJD7-PLA2G4B readthrough                                                                       |
| JMJD8         | jumonji domain containing 8                                                                     |
| JOSD1         | Josephin domain containing 1                                                                    |
| JOSD2         | Josephin domain containing 2                                                                    |
| JPH4          | junctophilin 4                                                                                  |
| JPX           | JPX transcript, XIST activator (non-protein coding)                                             |
| JTB           | jumping translocation breakpoint                                                                |
| JUN           | jun proto-oncogene                                                                              |
| JUNB          | jun B proto-oncogene                                                                            |
| JUND          | jun D proto-oncogene                                                                            |
| KANSL1L       | KAT8 regulatory NSL complex subunit 1-like                                                      |
| KANSL2        | KAT8 regulatory NSL complex subunit 2                                                           |
| KANSL3        | KAT8 regulatory NSL complex subunit 3                                                           |
| KARS          | lysyl-tRNA synthetase                                                                           |
| KAT5          | K(lysine) acetyltransferase 5                                                                   |
| KAT6A         | K(lysine) acetyltransferase 6A                                                                  |
| KAT6B         | K(lysine) acetyltransferase 6B                                                                  |
| KAT7          | K(lysine) acetyltransferase 7                                                                   |
| KAT8          | K(lysine) acetyltransferase 8                                                                   |
| KATNA1        | katanin p60 (ATPase containing) subunit A 1                                                     |
| KATNBL1       | katanin p80 subunit B-like 1                                                                    |
| KAZALD1       | Kazal-type serine peptidase inhibitor domain 1                                                  |
| KBTBD2        | kelch repeat and BTB (POZ) domain containing 2                                                  |
| KBTBD4        | kelch repeat and BTB (POZ) domain containing 4                                                  |
| KBTBD6        | kelch repeat and BTB (POZ) domain containing 6                                                  |
| KBTBD7        | kelch repeat and BTB (POZ) domain containing 7                                                  |
| KBTBD8        | kelch repeat and BTB (POZ) domain containing 8                                                  |
| KCMF1         | potassium channel modulatory factor 1                                                           |
| KCNC3         | potassium channel, voltage gated Shaw related subfamily C, member 3                             |
| KCND1         | potassium channel, voltage gated Shal related subfamily D, member 1                             |
| KCNIP2        | Kv channel interacting protein 2                                                                |
| KCNK7         | potassium channel, two pore domain subfamily K, member 7                                        |
| KCNMB2        | potassium channel subfamily M regulatory beta subunit 2                                         |
| KCNN4         | potassium channel, calcium activated intermediate/small conductance subfamily N alpha, member 4 |
| KCTD11        | potassium channel tetramerization domain containing 11                                          |
| KCTD18        | potassium channel tetramerization domain containing 18                                          |
| KCTD20        | potassium channel tetramerization domain containing 20                                          |

|           |                                                                           |
|-----------|---------------------------------------------------------------------------|
| KCTD5     | potassium channel tetramerization domain containing 5                     |
| KCTD9     | potassium channel tetramerization domain containing 9                     |
| KDELC1    | KDEL (Lys-Asp-Glu-Leu) containing 1                                       |
| KDELC2    | KDEL (Lys-Asp-Glu-Leu) containing 2                                       |
| KDELR1    | KDEL (Lys-Asp-Glu-Leu) endoplasmic reticulum protein retention receptor 1 |
| KDM1A     | lysine (K)-specific demethylase 1A                                        |
| KDM1B     | lysine (K)-specific demethylase 1B                                        |
| KDM2A     | lysine (K)-specific demethylase 2A                                        |
| KDM3A     | lysine (K)-specific demethylase 3A                                        |
| KDM3B     | lysine (K)-specific demethylase 3B                                        |
| KDM4A     | lysine (K)-specific demethylase 4A                                        |
| KDM4B     | lysine (K)-specific demethylase 4B                                        |
| KDM4C     | lysine (K)-specific demethylase 4C                                        |
| KDM5A     | lysine (K)-specific demethylase 5A                                        |
| KDM5C     | lysine (K)-specific demethylase 5C                                        |
| KDSR      | 3-ketodihydrosphingosine reductase                                        |
| KEAP1     | kelch-like ECH-associated protein 1                                       |
| KHDRBS1   | KH domain containing, RNA binding, signal transduction associated 1       |
| KHK       | ketoheokinase (fructokinase)                                              |
| KHNYN     | KH and NYN domain containing                                              |
| KHSRP     | KH-type splicing regulatory protein                                       |
| KIAA0020  | KIAA0020                                                                  |
| KIAA0100  | KIAA0100                                                                  |
| KIAA0141  | KIAA0141                                                                  |
| KIAA0226  | KIAA0226                                                                  |
| KIAA0226L | KIAA0226-like                                                             |
| KIAA0319L | KIAA0319-like                                                             |
| KIAA0368  | KIAA0368                                                                  |
| KIAA0391  | KIAA0391                                                                  |
| KIAA0586  | KIAA0586                                                                  |
| KIAA0753  | KIAA0753                                                                  |
| KIAA0825  | KIAA0825                                                                  |
| KIAA0907  | KIAA0907                                                                  |
| KIAA0922  | KIAA0922                                                                  |
| KIAA1033  | KIAA1033                                                                  |
| KIAA1143  | KIAA1143                                                                  |
| KIAA1429  | KIAA1429                                                                  |
| KIAA1524  | KIAA1524                                                                  |
| KIAA1551  | KIAA1551                                                                  |
| KIAA1683  | KIAA1683                                                                  |
| KIAA1715  | KIAA1715                                                                  |

|          |                                    |
|----------|------------------------------------|
| KIAA1919 | KIAA1919                           |
| KIAA1958 | KIAA1958                           |
| KIAA2026 | KIAA2026                           |
| KIF11    | kinesin family member 11           |
| KIF13A   | kinesin family member 13A          |
| KIF15    | kinesin family member 15           |
| KIF18B   | kinesin family member 18B          |
| KIF1BP   | KIF1 binding protein               |
| KIF20A   | kinesin family member 20A          |
| KIF20B   | kinesin family member 20B          |
| KIF21A   | kinesin family member 21A          |
| KIF21B   | kinesin family member 21B          |
| KIF22    | kinesin family member 22           |
| KIF27    | kinesin family member 27           |
| KIF2A    | kinesin heavy chain member 2A      |
| KIF2C    | kinesin family member 2C           |
| KIF3B    | kinesin family member 3B           |
| KIF9     | kinesin family member 9            |
| KIFC3    | kinesin family member C3           |
| KLC2     | kinesin light chain 2              |
| KLC3     | kinesin light chain 3              |
| KLC4     | kinesin light chain 4              |
| KLF10    | Kruppel-like factor 10             |
| KLF12    | Kruppel-like factor 12             |
| KLF13    | Kruppel-like factor 13             |
| KLF6     | Kruppel-like factor 6              |
| KLF7     | Kruppel-like factor 7 (ubiquitous) |
| KLHDC10  | kelch domain containing 10         |
| KLHDC2   | kelch domain containing 2          |
| KLHDC4   | kelch domain containing 4          |
| KLHDC9   | kelch domain containing 9          |
| KLHL11   | kelch-like family member 11        |
| KLHL12   | kelch-like family member 12        |
| KLHL18   | kelch-like family member 18        |
| KLHL20   | kelch-like family member 20        |
| KLHL21   | kelch-like family member 21        |
| KLHL24   | kelch-like family member 24        |
| KLHL28   | kelch-like family member 28        |
| KLHL6    | kelch-like family member 6         |
| KLHL8    | kelch-like family member 8         |
| KLKP1    | kallikrein pseudogene 1            |

|           |                                                                 |
|-----------|-----------------------------------------------------------------|
| KLLN      | killin, p53-regulated DNA replication inhibitor                 |
| KLRD1     | killer cell lectin-like receptor subfamily D, member 1          |
| KMO       | kynurenine 3-monooxygenase (kynurenine 3-hydroxylase)           |
| KMT2C     | lysine (K)-specific methyltransferase 2C                        |
| KMT2D     | lysine (K)-specific methyltransferase 2D                        |
| KMT2E     | lysine (K)-specific methyltransferase 2E                        |
| KNSTRN    | kinetochore-localized astrin/SPAG5 binding protein              |
| KNTC1     | kinetochore associated 1                                        |
| KPNA5     | karyopherin alpha 5 (importin alpha 6)                          |
| KPNA6     | karyopherin alpha 6 (importin alpha 7)                          |
| KPNB1     | karyopherin (importin) beta 1                                   |
| KPTN      | kaptin (actin binding protein)                                  |
| KRI1      | KRI1 homolog ( <i>S. cerevisiae</i> )                           |
| KRR1      | KRR1, small subunit (SSU) processome component, homolog (yeast) |
| KRTAP21-3 | keratin associated protein 21-3                                 |
| KRTCAP2   | keratinocyte associated protein 2                               |
| KSR1      | kinase suppressor of ras 1                                      |
| KTI12     | KTI12 homolog, chromatin associated ( <i>S. cerevisiae</i> )    |
| KXD1      | KxDL motif containing 1                                         |
| L3MBTL2   | l(3)mbt-like 2 ( <i>Drosophila</i> )                            |
| LACE1     | lactation elevated 1                                            |
| LAGE3     | L antigen family, member 3                                      |
| LAMC1     | laminin, gamma 1 (formerly LAMB2)                               |
| LAMP1     | lysosomal-associated membrane protein 1                         |
| LAMP3     | lysosomal-associated membrane protein 3                         |
| LAMTOR1   | late endosomal/lysosomal adaptor, MAPK and MTOR activator 1     |
| LAMTOR2   | late endosomal/lysosomal adaptor, MAPK and MTOR activator 2     |
| LAMTOR3   | late endosomal/lysosomal adaptor, MAPK and MTOR activator 3     |
| LAMTOR4   | late endosomal/lysosomal adaptor, MAPK and MTOR activator 4     |
| LAMTOR5   | late endosomal/lysosomal adaptor, MAPK and MTOR activator 5     |
| LANCL2    | LanC lantibiotic synthetase component C-like 2 (bacterial)      |
| LAP3      | leucine aminopeptidase 3                                        |
| LAPTM4A   | lysosomal protein transmembrane 4 alpha                         |
| LAPTM5    | lysosomal protein transmembrane 5                               |
| LARP1B    | La ribonucleoprotein domain family, member 1B                   |
| LARP4     | La ribonucleoprotein domain family, member 4                    |
| LARP7     | La ribonucleoprotein domain family, member 7                    |
| LARS      | leucyl-tRNA synthetase                                          |
| LAS1L     | LAS1-like ( <i>S. cerevisiae</i> )                              |
| LASP1     | LIM and SH3 protein 1                                           |
| LAT2      | linker for activation of T cells family, member 2               |

|           |                                                                                          |
|-----------|------------------------------------------------------------------------------------------|
| LATS1     | large tumor suppressor kinase 1                                                          |
| LAX1      | lymphocyte transmembrane adaptor 1                                                       |
| LBH       | limb bud and heart development                                                           |
| LBX2      | ladybird homeobox 2                                                                      |
| LCAT      | lecithin-cholesterol acyltransferase                                                     |
| LCK       | LCK proto-oncogene, Src family tyrosine kinase                                           |
| LCLAT1    | lysocardiolipin acyltransferase 1                                                        |
| LCMT2     | leucine carboxyl methyltransferase 2                                                     |
| LCP1      | lymphocyte cytosolic protein 1 (L-plastin)                                               |
| LDAH      | lipid droplet associated hydrolase                                                       |
| LDHA      | lactate dehydrogenase A                                                                  |
| LDHB      | lactate dehydrogenase B                                                                  |
| LDLR      | low density lipoprotein receptor                                                         |
| LEAP2     | liver expressed antimicrobial peptide 2                                                  |
| LEKR1     | leucine, glutamate and lysine rich 1                                                     |
| LEMD2     | LEM domain containing 2                                                                  |
| LEMD3     | LEM domain containing 3                                                                  |
| LENEP     | lens epithelial protein                                                                  |
| LENG1     | leukocyte receptor cluster (LRC) member 1                                                |
| LENG8     | leukocyte receptor cluster (LRC) member 8                                                |
| LENG9     | leukocyte receptor cluster (LRC) member 9                                                |
| LETM1     | leucine zipper-EF-hand containing transmembrane protein 1                                |
| LETM2     | leucine zipper-EF-hand containing transmembrane protein 2                                |
| LETMD1    | LETM1 domain containing 1                                                                |
| LGALS1    | lectin, galactoside-binding, soluble, 1                                                  |
| LGALS17A  | Charcot-Leyden crystal protein pseudogene                                                |
| LHB       | luteinizing hormone beta polypeptide                                                     |
| LIAS      | lipoic acid synthetase                                                                   |
| LILRB1    | leukocyte immunoglobulin-like receptor, subfamily B (with TM and ITIM domains), member 1 |
| LIMD1     | LIM domains containing 1                                                                 |
| LIMD2     | LIM domain containing 2                                                                  |
| LIME1     | Lck interacting transmembrane adaptor 1                                                  |
| LIN52     | lin-52 DREAM MuvB core complex component                                                 |
| LIN54     | lin-54 DREAM MuvB core complex component                                                 |
| LIN7B     | lin-7 homolog B (C. elegans)                                                             |
| LIN7C     | lin-7 homolog C (C. elegans)                                                             |
| LIN9      | lin-9 DREAM MuvB core complex component                                                  |
| LINC00029 | long intergenic non-protein coding RNA 29                                                |
| LINC00167 | long intergenic non-protein coding RNA 167                                               |
| LINC00176 | long intergenic non-protein coding RNA 176                                               |
| LINC00200 | long intergenic non-protein coding RNA 200                                               |



|              |                                                        |
|--------------|--------------------------------------------------------|
| LINC00235    | long intergenic non-protein coding RNA 235             |
| LINC00265    | long intergenic non-protein coding RNA 265             |
| LINC00273    | long intergenic non-protein coding RNA 273             |
| LINC00309    | long intergenic non-protein coding RNA 309             |
| LINC00324    | long intergenic non-protein coding RNA 324             |
| LINC00339    | long intergenic non-protein coding RNA 339             |
| LINC00426    | long intergenic non-protein coding RNA 426             |
| LINC00467    | long intergenic non-protein coding RNA 467             |
| LINC00471    | long intergenic non-protein coding RNA 471             |
| LINC00476    | long intergenic non-protein coding RNA 476             |
| LINC00493    | long intergenic non-protein coding RNA 493             |
| LINC00515    | long intergenic non-protein coding RNA 515             |
| LINC00526    | long intergenic non-protein coding RNA 526             |
| LINC01465    | long intergenic non-protein coding RNA 1465            |
| LINC01547    | long intergenic non-protein coding RNA 1547            |
| LINC01550    | long intergenic non-protein coding RNA 1550            |
| LINGO3       | leucine rich repeat and Ig domain containing 3         |
| LIPH         | lipase, member H                                       |
| LIPT1        | lipoyltransferase 1                                    |
| LLPH         | LLP homolog, long-term synaptic facilitation (Aplysia) |
| LMAN2        | lectin, mannose-binding 2                              |
| LMBR1        | limb development membrane protein 1                    |
| LMBRD1       | LMBR1 domain containing 1                              |
| LMF2         | lipase maturation factor 2                             |
| LMNB1        | lamin B1                                               |
| LMO2         | LIM domain only 2 (rhombotin-like 1)                   |
| LNP1         | leukemia NUP98 fusion partner 1                        |
| LNPEP        | leucyl/cystinyl aminopeptidase                         |
| LOC100128164 | four and a half LIM domains 1 pseudogene               |
| LOC100128573 | uncharacterized LOC100128573                           |
| LOC100128682 |                                                        |
| LOC100129034 | uncharacterized LOC100129034                           |
| LOC100129046 | uncharacterized LOC100129046                           |
| LOC100129083 | uncharacterized LOC100129083                           |
| LOC100129148 | uncharacterized LOC100129148                           |
| LOC100129361 |                                                        |
| LOC100129518 | uncharacterized LOC100129518                           |
| LOC100129917 | uncharacterized LOC100129917                           |
| LOC100130093 | uncharacterized LOC100130093                           |
| LOC100130451 | uncharacterized LOC100130451                           |
| LOC100130691 | uncharacterized LOC100130691                           |

|              |                                                                          |
|--------------|--------------------------------------------------------------------------|
| LOC100130872 | uncharacterized LOC100130872                                             |
| LOC100130950 | uncharacterized LOC100130950                                             |
| LOC100130987 | uncharacterized LOC100130987                                             |
| LOC100130992 | uncharacterized LOC100130992                                             |
| LOC100131564 | uncharacterized LOC100131564                                             |
| LOC100131655 | uncharacterized LOC100131655                                             |
| LOC100131691 |                                                                          |
| LOC100132352 | FSHD region gene 1 pseudogene                                            |
| LOC100132356 | uncharacterized LOC100132356                                             |
| LOC100132891 |                                                                          |
| LOC100133315 | transient receptor potential cation channel, subfamily C, member 2-like  |
| LOC100133985 | uncharacterized LOC100133985                                             |
| LOC100268168 | uncharacterized LOC100268168                                             |
| LOC100270746 | uncharacterized LOC100270746                                             |
| LOC100287015 | uncharacterized LOC100287015                                             |
| LOC100287036 | uncharacterized LOC100287036                                             |
| LOC100287042 | uncharacterized LOC100287042                                             |
| LOC100288069 | uncharacterized LOC100288069                                             |
| LOC100288842 | UDP-GlcNAc:betaGal beta-1,3-N-acetylglucosaminyltransferase 5 pseudogene |
| LOC100288846 | uncharacterized LOC100288846                                             |
| LOC100289230 | uncharacterized LOC100289230                                             |
| LOC100289361 | uncharacterized LOC100289361                                             |
| LOC100289495 | uncharacterized LOC100289495                                             |
| LOC100289511 | uncharacterized LOC100289511                                             |
| LOC100499194 | uncharacterized LOC100499194                                             |
| LOC100499489 | uncharacterized LOC100499489                                             |
| LOC100505549 | uncharacterized LOC100505549                                             |
| LOC100505622 | uncharacterized LOC100505622                                             |
| LOC100505658 | uncharacterized LOC100505658                                             |
| LOC100505666 | uncharacterized LOC100505666                                             |
| LOC100505812 |                                                                          |
| LOC100506083 | uncharacterized LOC100506083                                             |
| LOC100506207 | uncharacterized LOC100506207                                             |
| LOC100506469 |                                                                          |
| LOC100506548 | uncharacterized LOC100506548                                             |
| LOC100506713 |                                                                          |
| LOC100506746 | uncharacterized LOC100506746                                             |
| LOC100506801 | uncharacterized LOC100506801                                             |
| LOC100506804 | uncharacterized LOC100506804                                             |
| LOC100507053 | uncharacterized LOC100507053                                             |
| LOC100507156 | uncharacterized LOC100507156                                             |

|              |                                                                                                      |
|--------------|------------------------------------------------------------------------------------------------------|
| LOC100507217 |                                                                                                      |
| LOC100507250 | uncharacterized LOC100507250                                                                         |
| LOC100507346 | uncharacterized LOC100507346                                                                         |
| LOC100507462 | uncharacterized LOC100507462                                                                         |
| LOC100507501 |                                                                                                      |
| LOC100507557 | uncharacterized LOC100507557                                                                         |
| LOC100507564 | uncharacterized LOC100507564                                                                         |
| LOC100507577 | uncharacterized LOC100507577                                                                         |
| LOC100507600 | uncharacterized LOC100507600                                                                         |
| LOC100507634 | uncharacterized LOC100507634                                                                         |
| LOC100630918 |                                                                                                      |
| LOC145783    | uncharacterized LOC145783                                                                            |
| LOC148413    | uncharacterized LOC148413                                                                            |
| LOC153684    | uncharacterized LOC153684                                                                            |
| LOC155060    | AI894139 pseudogene                                                                                  |
| LOC256880    | uncharacterized LOC256880                                                                            |
| LOC257396    | uncharacterized LOC257396                                                                            |
| LOC283070    |                                                                                                      |
| LOC283710    | uncharacterized LOC283710                                                                            |
| LOC284023    | uncharacterized LOC284023                                                                            |
| LOC284454    | uncharacterized LOC284454                                                                            |
| LOC284648    | uncharacterized LOC284648                                                                            |
| LOC285696    | uncharacterized LOC285696                                                                            |
| LOC286059    | tumor necrosis factor receptor superfamily, member 10d, decoy with truncated death domain pseudogene |
| LOC286190    |                                                                                                      |
| LOC286367    |                                                                                                      |
| LOC339803    | uncharacterized LOC339803                                                                            |
| LOC339807    | uncharacterized LOC339807                                                                            |
| LOC344967    | acyl-CoA thioesterase 7 pseudogene                                                                   |
| LOC374443    | C-type lectin domain family 2, member D pseudogene                                                   |
| LOC389641    | uncharacterized LOC389641                                                                            |
| LOC391322    | D-dopachrome tautomerase-like                                                                        |
| LOC400958    | uncharacterized LOC400958                                                                            |
| LOC401052    | uncharacterized LOC401052                                                                            |
| LOC440028    | uncharacterized LOC440028                                                                            |
| LOC440600    | uncharacterized LOC440600                                                                            |
| LOC440700    | carbonic anhydrase XIV (CA14) pseudogene                                                             |
| LOC63930     | uncharacterized LOC63930                                                                             |
| LOC643770    | uncharacterized LOC643770                                                                            |
| LOC644656    | uncharacterized LOC644656                                                                            |
| LOC644961    |                                                                                                      |

|           |                                                                               |
|-----------|-------------------------------------------------------------------------------|
| LOC645513 | uncharacterized LOC645513                                                     |
| LOC646626 | uncharacterized LOC646626                                                     |
| LOC646862 |                                                                               |
| LOC648987 | uncharacterized LOC648987                                                     |
| LOC652276 | potassium channel tetramerization domain containing 5 pseudogene              |
| LOC728175 | uncharacterized LOC728175                                                     |
| LOC728613 | programmed cell death 6 pseudogene                                            |
| LOC728743 | zinc finger protein pseudogene                                                |
| LOC729603 | calcineurin-like EF-hand protein 1 pseudogene                                 |
| LOC81691  | exonuclease NEF-sp                                                            |
| LOC91450  | uncharacterized LOC91450                                                      |
| LOC93622  | Morf4 family associated protein 1-like 1 pseudogene                           |
| LOH12CR1  | loss of heterozygosity, 12, chromosomal region 1                              |
| LOH12CR2  | loss of heterozygosity, 12, chromosomal region 2 (non-protein coding)         |
| LONP1     | lon peptidase 1, mitochondrial                                                |
| LOXL3     | lysyl oxidase-like 3                                                          |
| LPAR2     | lysophosphatidic acid receptor 2                                              |
| LPAR5     | lysophosphatidic acid receptor 5                                              |
| LPCAT3    | lysophosphatidylcholine acyltransferase 3                                     |
| LPCAT4    | lysophosphatidylcholine acyltransferase 4                                     |
| LPXN      | leupaxin                                                                      |
| LRBA      | LPS-responsive vesicle trafficking, beach and anchor containing               |
| LRCH1     | leucine-rich repeats and calponin homology (CH) domain containing 1           |
| LRCH3     | leucine-rich repeats and calponin homology (CH) domain containing 3           |
| LRCH4     | leucine-rich repeats and calponin homology (CH) domain containing 4           |
| LRFN4     | leucine rich repeat and fibronectin type III domain containing 4              |
| LRIF1     | ligand dependent nuclear receptor interacting factor 1                        |
| LRIG2     | leucine-rich repeats and immunoglobulin-like domains 2                        |
| LRMP      | lymphoid-restricted membrane protein                                          |
| LRP10     | low density lipoprotein receptor-related protein 10                           |
| LRP2BP    | LRP2 binding protein                                                          |
| LRP8      | low density lipoprotein receptor-related protein 8, apolipoprotein e receptor |
| LRPAP1    | low density lipoprotein receptor-related protein associated protein 1         |
| LRPPRC    | leucine-rich pentatricopeptide repeat containing                              |
| LRR1      | leucine rich repeat protein 1                                                 |
| LRRC20    | leucine rich repeat containing 20                                             |
| LRRC24    | leucine rich repeat containing 24                                             |
| LRRC27    | leucine rich repeat containing 27                                             |
| LRRC28    | leucine rich repeat containing 28                                             |
| LRRC29    | leucine rich repeat containing 29                                             |
| LRRC34    | leucine rich repeat containing 34                                             |

|            |                                                                        |
|------------|------------------------------------------------------------------------|
| LRR37A3    | leucine rich repeat containing 37, member A3                           |
| LRR3C      | leucine rich repeat containing 3C                                      |
| LRR40      | leucine rich repeat containing 40                                      |
| LRR41      | leucine rich repeat containing 41                                      |
| LRR42      | leucine rich repeat containing 42                                      |
| LRR43      | leucine rich repeat containing 43                                      |
| LRR56      | leucine rich repeat containing 56                                      |
| LRR59      | leucine rich repeat containing 59                                      |
| LRR61      | leucine rich repeat containing 61                                      |
| LRR73      | leucine rich repeat containing 73                                      |
| LRR75A-AS1 | LRR75A antisense RNA 1                                                 |
| LRR8B      | leucine rich repeat containing 8 family, member B                      |
| LRRFIP2    | leucine rich repeat (in FLII) interacting protein 2                    |
| LRRIQ3     | leucine-rich repeats and IQ motif containing 3                         |
| LRRN3      | leucine rich repeat neuronal 3                                         |
| LRSAM1     | leucine rich repeat and sterile alpha motif containing 1               |
| LRWD1      | leucine-rich repeats and WD repeat domain containing 1                 |
| LSG1       | large 60S subunit nuclear export GTPase 1                              |
| LSM1       | LSM1, U6 small nuclear RNA associated                                  |
| LSM11      | LSM11, U7 small nuclear RNA associated                                 |
| LSM12      | LSM12 homolog ( <i>S. cerevisiae</i> )                                 |
| LSM14A     | LSM14A, SCD6 homolog A ( <i>S. cerevisiae</i> )                        |
| LSM3       | LSM3 homolog, U6 small nuclear RNA associated ( <i>S. cerevisiae</i> ) |
| LSM4       | LSM4 homolog, U6 small nuclear RNA associated ( <i>S. cerevisiae</i> ) |
| LSM7       | LSM7 homolog, U6 small nuclear RNA associated ( <i>S. cerevisiae</i> ) |
| LSP1       | lymphocyte-specific protein 1                                          |
| LSR        | lipolysis stimulated lipoprotein receptor                              |
| LTA4H      | leukotriene A4 hydrolase                                               |
| LTB4R      | leukotriene B4 receptor                                                |
| LTB4R2     | leukotriene B4 receptor 2                                              |
| LTC4S      | leukotriene C4 synthase                                                |
| LTN1       | listerin E3 ubiquitin protein ligase 1                                 |
| LTV1       | LTV1 ribosome biogenesis factor                                        |
| LUC7L      | LUC7-like ( <i>S. cerevisiae</i> )                                     |
| LUC7L2     | LUC7-like 2 ( <i>S. cerevisiae</i> )                                   |
| LUC7L3     | LUC7-like 3 ( <i>S. cerevisiae</i> )                                   |
| LXN        | latexin                                                                |
| LY75       | lymphocyte antigen 75                                                  |
| LY75-CD302 | LY75-CD302 readthrough                                                 |
| LY86       | lymphocyte antigen 86                                                  |
| LY9        | lymphocyte antigen 9                                                   |

|           |                                                                             |
|-----------|-----------------------------------------------------------------------------|
| LYL1      | lymphoblastic leukemia associated hematopoiesis regulator 1                 |
| LYN       | LYN proto-oncogene, Src family tyrosine kinase                              |
| LYPLA2    | lysophospholipase II                                                        |
| LYRM1     | LYR motif containing 1                                                      |
| LYRM2     | LYR motif containing 2                                                      |
| LYRM5     | LYR motif containing 5                                                      |
| LYSMD1    | LysM, putative peptidoglycan-binding, domain containing 1                   |
| LYSMD3    | LysM, putative peptidoglycan-binding, domain containing 3                   |
| LYST      | lysosomal trafficking regulator                                             |
| LZIC      | leucine zipper and CTNNBIP1 domain containing                               |
| LZTFL1    | leucine zipper transcription factor-like 1                                  |
| LZTR1     | leucine-zipper-like transcription regulator 1                               |
| M6PR      | mannose-6-phosphate receptor (cation dependent)                             |
| MAD1L1    | MAD1 mitotic arrest deficient-like 1 (yeast)                                |
| MAD2L1    | MAD2 mitotic arrest deficient-like 1 (yeast)                                |
| MAD2L1BP  | MAD2L1 binding protein                                                      |
| MADD      | MAP-kinase activating death domain                                          |
| MAEA      | macrophage erythroblast attacher                                            |
| MAF1      | MAF1 homolog (S. cerevisiae)                                                |
| MAGOH     | mago-nashi homolog, proliferation-associated (Drosophila)                   |
| MAGOHB    | mago-nashi homolog B (Drosophila)                                           |
| MAK       | male germ cell-associated kinase                                            |
| MAK16     | MAK16 homolog (S. cerevisiae)                                               |
| MALAT1    | metastasis associated lung adenocarcinoma transcript 1 (non-protein coding) |
| MALSU1    | mitochondrial assembly of ribosomal large subunit 1                         |
| MALT1     | MALT1 paracaspase                                                           |
| MAMDC4    | MAM domain containing 4                                                     |
| MAML1     | mastermind-like 1 (Drosophila)                                              |
| MAML2     | mastermind-like 2 (Drosophila)                                              |
| MAMSTR    | MEF2 activating motif and SAP domain containing transcriptional regulator   |
| MAN1A1    | mannosidase, alpha, class 1A, member 1                                      |
| MAN1B1    | mannosidase, alpha, class 1B, member 1                                      |
| MAN2A2    | mannosidase, alpha, class 2A, member 2                                      |
| MAN2B1    | mannosidase, alpha, class 2B, member 1                                      |
| MAN2C1    | mannosidase, alpha, class 2C, member 1                                      |
| MANBAL    | mannosidase, beta A, lysosomal-like                                         |
| MAP1LC3B  | microtubule-associated protein 1 light chain 3 beta                         |
| MAP1LC3B2 | microtubule-associated protein 1 light chain 3 beta 2                       |
| MAP2K1    | mitogen-activated protein kinase kinase 1                                   |
| MAP2K2    | mitogen-activated protein kinase kinase 2                                   |
| MAP3K10   | mitogen-activated protein kinase kinase kinase 10                           |

|              |                                                                          |
|--------------|--------------------------------------------------------------------------|
| MAP3K11      | mitogen-activated protein kinase kinase kinase 11                        |
| MAP3K12      | mitogen-activated protein kinase kinase kinase 12                        |
| MAP3K14      | mitogen-activated protein kinase kinase kinase 14                        |
| MAP3K5       | mitogen-activated protein kinase kinase kinase 5                         |
| MAP3K6       | mitogen-activated protein kinase kinase kinase 6                         |
| MAP3K7       | mitogen-activated protein kinase kinase kinase 7                         |
| MAP3K8       | mitogen-activated protein kinase kinase kinase 8                         |
| MAP4         | microtubule-associated protein 4                                         |
| MAP4K1       | mitogen-activated protein kinase kinase kinase kinase 1                  |
| MAP4K2       | mitogen-activated protein kinase kinase kinase kinase 2                  |
| MAPK1        | mitogen-activated protein kinase 1                                       |
| MAPK13       | mitogen-activated protein kinase 13                                      |
| MAPK14       | mitogen-activated protein kinase 14                                      |
| MAPK1IP1L    | mitogen-activated protein kinase 1 interacting protein 1-like            |
| MAPK6        | mitogen-activated protein kinase 6                                       |
| MAPK7        | mitogen-activated protein kinase 7                                       |
| MAPK8IP3     | mitogen-activated protein kinase 8 interacting protein 3                 |
| MAPKAP1      | mitogen-activated protein kinase associated protein 1                    |
| MAPKAPK5     | mitogen-activated protein kinase-activated protein kinase 5              |
| MAPKAPK5-AS1 | MAPKAPK5 antisense RNA 1                                                 |
| MAPKBP1      | mitogen-activated protein kinase binding protein 1                       |
| Mar-03       | membrane-associated ring finger (C3HC4) 3, E3 ubiquitin protein ligase   |
| Mar-06       | membrane-associated ring finger (C3HC4) 6, E3 ubiquitin protein ligase   |
| Mar-07       | membrane-associated ring finger (C3HC4) 7, E3 ubiquitin protein ligase   |
| MARCKS       | myristoylated alanine-rich protein kinase C substrate                    |
| MARCKSL1     | MARCKS-like 1                                                            |
| MARS         | methionyl-tRNA synthetase                                                |
| MARVELD2     | MARVEL domain containing 2                                               |
| MAST2        | microtubule associated serine/threonine kinase 2                         |
| MAST3        | microtubule associated serine/threonine kinase 3                         |
| MASTL        | microtubule associated serine/threonine kinase-like                      |
| MAT2A        | methionine adenosyltransferase II, alpha                                 |
| MATR3        | matrin 3                                                                 |
| MAU2         | MAU2 sister chromatid cohesion factor                                    |
| MAZ          | MYC-associated zinc finger protein (purine-binding transcription factor) |
| MB21D1       | Mab-21 domain containing 1                                               |
| MBD1         | methyl-CpG binding domain protein 1                                      |
| MBD2         | methyl-CpG binding domain protein 2                                      |
| MBD3         | methyl-CpG binding domain protein 3                                      |
| MBD5         | methyl-CpG binding domain protein 5                                      |
| MBD6         | methyl-CpG binding domain protein 6                                      |

|               |                                                                                |
|---------------|--------------------------------------------------------------------------------|
| <b>MBLAC1</b> | <b>metallo-beta-lactamase domain containing 1</b>                              |
| <b>MBLAC2</b> | <b>metallo-beta-lactamase domain containing 2</b>                              |
| <b>MBNL1</b>  | <b>muscleblind-like splicing regulator 1</b>                                   |
| <b>MBOAT7</b> | <b>membrane bound O-acyltransferase domain containing 7</b>                    |
| <b>MBP</b>    | <b>myelin basic protein</b>                                                    |
| <b>MBTD1</b>  | <b>mbt domain containing 1</b>                                                 |
| <b>MBTPS1</b> | <b>membrane-bound transcription factor peptidase, site 1</b>                   |
| <b>MC1R</b>   | <b>melanocortin 1 receptor (alpha melanocyte stimulating hormone receptor)</b> |
| <b>MCAT</b>   | <b>malonyl CoA:ACP acyltransferase (mitochondrial)</b>                         |
| <b>MCCC1</b>  | <b>methylcrotonoyl-CoA carboxylase 1 (alpha)</b>                               |
| <b>MCCC2</b>  | <b>methylcrotonoyl-CoA carboxylase 2 (beta)</b>                                |
| <b>MCCD1</b>  | <b>mitochondrial coiled-coil domain 1</b>                                      |
| <b>MCEE</b>   | <b>methylmalonyl CoA epimerase</b>                                             |
| <b>MCFD2</b>  | <b>multiple coagulation factor deficiency 2</b>                                |
| <b>MCL1</b>   | <b>myeloid cell leukemia 1</b>                                                 |
| <b>MCM2</b>   | <b>minichromosome maintenance complex component 2</b>                          |
| <b>MCM3</b>   | <b>minichromosome maintenance complex component 3</b>                          |
| <b>MCM3AP</b> | <b>minichromosome maintenance complex component 3 associated protein</b>       |
| <b>MCM4</b>   | <b>minichromosome maintenance complex component 4</b>                          |
| <b>MCM5</b>   | <b>minichromosome maintenance complex component 5</b>                          |
| <b>MCM6</b>   | <b>minichromosome maintenance complex component 6</b>                          |
| <b>MCM7</b>   | <b>minichromosome maintenance complex component 7</b>                          |
| <b>MCM8</b>   | <b>minichromosome maintenance complex component 8</b>                          |
| <b>MCMBP</b>  | <b>minichromosome maintenance complex binding protein</b>                      |
| <b>MCOLN1</b> | <b>mucolipin 1</b>                                                             |
| <b>MCOLN2</b> | <b>mucolipin 2</b>                                                             |
| <b>MCPH1</b>  | <b>microcephalin 1</b>                                                         |
| <b>MCRS1</b>  | <b>microspherule protein 1</b>                                                 |
| <b>MCTS1</b>  | <b>malignant T cell amplified sequence 1</b>                                   |
| <b>MCTS2P</b> | <b>malignant T cell amplified sequence 2, pseudogene</b>                       |
| <b>MCU</b>    | <b>mitochondrial calcium uniporter</b>                                         |
| <b>MCUR1</b>  | <b>mitochondrial calcium uniporter regulator 1</b>                             |
| <b>MDC1</b>   | <b>mediator of DNA-damage checkpoint 1</b>                                     |
| <b>MDH1</b>   | <b>malate dehydrogenase 1, NAD (soluble)</b>                                   |
| <b>MDH1B</b>  | <b>malate dehydrogenase 1B, NAD (soluble)</b>                                  |
| <b>MDH2</b>   | <b>malate dehydrogenase 2, NAD (mitochondrial)</b>                             |
| <b>MDK</b>    | <b>midkine (neurite growth-promoting factor 2)</b>                             |
| <b>MDM2</b>   | <b>MDM2 proto-oncogene, E3 ubiquitin protein ligase</b>                        |
| <b>MDM4</b>   | <b>MDM4, p53 regulator</b>                                                     |
| <b>MDN1</b>   | <b>MDN1, midasin homolog (yeast)</b>                                           |
| <b>MDP1</b>   | <b>magnesium-dependent phosphatase 1</b>                                       |



|               |                                                  |
|---------------|--------------------------------------------------|
| MEAF6         | MYST/Esa1-associated factor 6                    |
| MED1          | mediator complex subunit 1                       |
| MED10         | mediator complex subunit 10                      |
| MED11         | mediator complex subunit 11                      |
| MED13         | mediator complex subunit 13                      |
| MED16         | mediator complex subunit 16                      |
| MED17         | mediator complex subunit 17                      |
| MED18         | mediator complex subunit 18                      |
| MED19         | mediator complex subunit 19                      |
| MED20         | mediator complex subunit 20                      |
| MED22         | mediator complex subunit 22                      |
| MED23         | mediator complex subunit 23                      |
| MED26         | mediator complex subunit 26                      |
| MED28         | mediator complex subunit 28                      |
| MED29         | mediator complex subunit 29                      |
| MED31         | mediator complex subunit 31                      |
| MED4          | mediator complex subunit 4                       |
| MED7          | mediator complex subunit 7                       |
| MEF2A         | myocyte enhancer factor 2A                       |
| MEF2B         | myocyte enhancer factor 2B                       |
| MEF2BNB       | MEF2B neighbor                                   |
| MEF2BNB-MEF2B | MEF2BNB-MEF2B readthrough                        |
| MEF2D         | myocyte enhancer factor 2D                       |
| MEGF8         | multiple EGF-like-domains 8                      |
| MEIG1         | meiosis/spermiogenesis associated 1              |
| MEIS2         | Meis homeobox 2                                  |
| MELK          | maternal embryonic leucine zipper kinase         |
| MEMO1         | mediator of cell motility 1                      |
| MEPCE         | methylphosphate capping enzyme                   |
| MESDC1        | mesoderm development candidate 1                 |
| MESDC2        | mesoderm development candidate 2                 |
| METAP1        | methionyl aminopeptidase 1                       |
| METAP1D       | methionyl aminopeptidase type 1D (mitochondrial) |
| METAP2        | methionyl aminopeptidase 2                       |
| METTL1        | methyltransferase like 1                         |
| METTL10       | methyltransferase like 10                        |
| METTL12       | methyltransferase like 12                        |
| METTL13       | methyltransferase like 13                        |
| METTL15       | methyltransferase like 15                        |
| METTL16       | methyltransferase like 16                        |
| METTL18       | methyltransferase like 18                        |

|           |                                                                              |
|-----------|------------------------------------------------------------------------------|
| METTL21A  | methyltransferase like 21A                                                   |
| METTL21B  | methyltransferase like 21B                                                   |
| METTL23   | methyltransferase like 23                                                    |
| METTL25   | methyltransferase like 25                                                    |
| METTL2B   | methyltransferase like 2B                                                    |
| METTL5    | methyltransferase like 5                                                     |
| METTL6    | methyltransferase like 6                                                     |
| METTL7A   | methyltransferase like 7A                                                    |
| METTL8    | methyltransferase like 8                                                     |
| METTL9    | methyltransferase like 9                                                     |
| MEX3C     | mex-3 RNA binding family member C                                            |
| MFAP1     | microfibrillar-associated protein 1                                          |
| MFAP3     | microfibrillar-associated protein 3                                          |
| MFI2-AS1  | MFI2 antisense RNA 1                                                         |
| MFN1      | mitofusin 1                                                                  |
| MFN2      | mitofusin 2                                                                  |
| MFNG      | MFNG O-fucosylpeptide 3-beta-N-acetylglucosaminyltransferase                 |
| MFSD1     | major facilitator superfamily domain containing 1                            |
| MFSD10    | major facilitator superfamily domain containing 10                           |
| MFSD11    | major facilitator superfamily domain containing 11                           |
| MFSD12    | major facilitator superfamily domain containing 12                           |
| MFSD2A    | major facilitator superfamily domain containing 2A                           |
| MFSD3     | major facilitator superfamily domain containing 3                            |
| MFSD6L    | major facilitator superfamily domain containing 6-like                       |
| MFSD8     | major facilitator superfamily domain containing 8                            |
| MFSD9     | major facilitator superfamily domain containing 9                            |
| MGA       | MGA, MAX dimerization protein                                                |
| MGAT1     | mannosyl (alpha-1,3-)-glycoprotein beta-1,2-N-acetylglucosaminyltransferase  |
| MGAT2     | mannosyl (alpha-1,6-)-glycoprotein beta-1,2-N-acetylglucosaminyltransferase  |
| MGAT5     | mannosyl (alpha-1,6-)-glycoprotein beta-1,6-N-acetyl-glycosaminyltransferase |
| MGC16275  | uncharacterized protein MGC16275                                             |
| MGC45922  | uncharacterized LOC284365                                                    |
| MGC72080  | MGC72080 pseudogene                                                          |
| MGEA5     | meningioma expressed antigen 5 (hyaluronidase)                               |
| MGLL      | monoglyceride lipase                                                         |
| MGME1     | mitochondrial genome maintenance exonuclease 1                               |
| MGRN1     | mahogunin ring finger 1, E3 ubiquitin protein ligase                         |
| MIA-RAB4B | MIA-RAB4B readthrough (NMD candidate)                                        |
| MIB1      | mindbomb E3 ubiquitin protein ligase 1                                       |
| MIB2      | mindbomb E3 ubiquitin protein ligase 2                                       |
| MICAL1    | microtubule associated monoxygenase, calponin and LIM domain containing 1    |

|             |                                                                          |
|-------------|--------------------------------------------------------------------------|
| MICU2       | mitochondrial calcium uptake 2                                           |
| MIDN        | midnolin                                                                 |
| MIER1       | mesoderm induction early response 1, transcriptional regulator           |
| MIF         | macrophage migration inhibitory factor (glycosylation-inhibiting factor) |
| MIF4GD      | MIF4G domain containing                                                  |
| MIIP        | migration and invasion inhibitory protein                                |
| MINA        | MYC induced nuclear antigen                                              |
| MINOS1      | mitochondrial inner membrane organizing system 1                         |
| MINOS1-NBL1 | MINOS1-NBL1 readthrough                                                  |
| MINPP1      | multiple inositol-polyphosphate phosphatase 1                            |
| MIR103A2    | microRNA 103a-2                                                          |
| MIR103B2    | microRNA 103b-2                                                          |
| MIR107      | microRNA 107                                                             |
| MIR1181     | microRNA 1181                                                            |
| MIR1204     | microRNA 1204                                                            |
| MIR1207     | microRNA 1207                                                            |
| MIR1226     | microRNA 1226                                                            |
| MIR1227     | microRNA 1227                                                            |
| MIR1229     | microRNA 1229                                                            |
| MIR1238     | microRNA 1238                                                            |
| MIR1245A    | microRNA 1245a                                                           |
| MIR1245B    | microRNA 1245b                                                           |
| MIR1247     | microRNA 1247                                                            |
| MIR1248     | microRNA 1248                                                            |
| MIR1260B    | microRNA 1260b                                                           |
| MIR128-1    | microRNA 128-1                                                           |
| MIR1281     | microRNA 1281                                                            |
| MIR1282     | microRNA 1282                                                            |
| MIR1286     | microRNA 1286                                                            |
| MIR1292     | microRNA 1292                                                            |
| MIR1304     | microRNA 1304                                                            |
| MIR132      | microRNA 132                                                             |
| MIR141      | microRNA 141                                                             |
| MIR142      | microRNA 142                                                             |
| MIR146A     | microRNA 146a                                                            |
| MIR1470     | microRNA 1470                                                            |
| MIR150      | microRNA 150                                                             |
| MIR1538     | microRNA 1538                                                            |
| MIR1539     | microRNA 1539                                                            |
| MIR17       | microRNA 17                                                              |
| MIR17HG     | miR-17-92 cluster host gene                                              |

|                   |                           |
|-------------------|---------------------------|
| <b>MIR181A2HG</b> | <b>MIR181A2 host gene</b> |
| <b>MIR18A</b>     | <b>microRNA 18a</b>       |
| <b>MIR1908</b>    | <b>microRNA 1908</b>      |
| <b>MIR191</b>     | <b>microRNA 191</b>       |
| <b>MIR1913</b>    | <b>microRNA 1913</b>      |
| <b>MIR195</b>     | <b>microRNA 195</b>       |
| <b>MIR19A</b>     | <b>microRNA 19a</b>       |
| <b>MIR19B1</b>    | <b>microRNA 19b-1</b>     |
| <b>MIR200C</b>    | <b>microRNA 200c</b>      |
| <b>MIR20A</b>     | <b>microRNA 20a</b>       |
| <b>MIR21</b>      | <b>microRNA 21</b>        |
| <b>MIR212</b>     | <b>microRNA 212</b>       |
| <b>MIR22HG</b>    | <b>MIR22 host gene</b>    |
| <b>MIR23A</b>     | <b>microRNA 23a</b>       |
| <b>MIR24-2</b>    | <b>microRNA 24-2</b>      |
| <b>MIR25</b>      | <b>microRNA 25</b>        |
| <b>MIR27A</b>     | <b>microRNA 27a</b>       |
| <b>MIR2861</b>    | <b>microRNA 2861</b>      |
| <b>MIR29A</b>     | <b>microRNA 29a</b>       |
| <b>MIR29B1</b>    | <b>microRNA 29b-1</b>     |
| <b>MIR3124</b>    | <b>microRNA 3124</b>      |
| <b>MIR3138</b>    | <b>microRNA 3138</b>      |
| <b>MIR3142</b>    | <b>microRNA 3142</b>      |
| <b>MIR3143</b>    | <b>microRNA 3143</b>      |
| <b>MIR3150A</b>   | <b>microRNA 3150a</b>     |
| <b>MIR3150B</b>   | <b>microRNA 3150b</b>     |
| <b>MIR3153</b>    | <b>microRNA 3153</b>      |
| <b>MIR3158-1</b>  | <b>microRNA 3158-1</b>    |
| <b>MIR3158-2</b>  | <b>microRNA 3158-2</b>    |
| <b>MIR3175</b>    | <b>microRNA 3175</b>      |
| <b>MIR3177</b>    | <b>microRNA 3177</b>      |
| <b>MIR3178</b>    | <b>microRNA 3178</b>      |
| <b>MIR3187</b>    | <b>microRNA 3187</b>      |
| <b>MIR3188</b>    | <b>microRNA 3188</b>      |
| <b>MIR3190</b>    | <b>microRNA 3190</b>      |
| <b>MIR3191</b>    | <b>microRNA 3191</b>      |
| <b>MIR3199-1</b>  | <b>microRNA 3199-1</b>    |
| <b>MIR3199-2</b>  | <b>microRNA 3199-2</b>    |
| <b>MIR320A</b>    | <b>microRNA 320a</b>      |
| <b>MIR339</b>     | <b>microRNA 339</b>       |
| <b>MIR33B</b>     | <b>microRNA 33b</b>       |

|           |                 |
|-----------|-----------------|
| MIR3613   | microRNA 3613   |
| MIR3615   | microRNA 3615   |
| MIR3648-1 | microRNA 3648-1 |
| MIR3651   | microRNA 3651   |
| MIR3652   | microRNA 3652   |
| MIR3655   | microRNA 3655   |
| MIR3656   | microRNA 3656   |
| MIR3659   | microRNA 3659   |
| MIR365A   | microRNA 365a   |
| MIR3661   | microRNA 3661   |
| MIR3662   | microRNA 3662   |
| MIR3665   | microRNA 3665   |
| MIR3678   | microRNA 3678   |
| MIR3680-1 | microRNA 3680-1 |
| MIR3684   | microRNA 3684   |
| MIR3687-1 | microRNA 3687-1 |
| MIR3912   | microRNA 3912   |
| MIR3913-1 | microRNA 3913-1 |
| MIR3913-2 | microRNA 3913-2 |
| MIR3918   | microRNA 3918   |
| MIR3925   | microRNA 3925   |
| MIR3945   | microRNA 3945   |
| MIR3960   | microRNA 3960   |
| MIR425    | microRNA 425    |
| MIR4258   | microRNA 4258   |
| MIR4278   | microRNA 4278   |
| MIR4285   | microRNA 4285   |
| MIR4321   | microRNA 4321   |
| MIR4322   | microRNA 4322   |
| MIR4323   | microRNA 4323   |
| MIR4426   | microRNA 4426   |
| MIR4427   | microRNA 4427   |
| MIR4434   | microRNA 4434   |
| MIR4437   | microRNA 4437   |
| MIR4442   | microRNA 4442   |
| MIR4449   | microRNA 4449   |
| MIR4453   | microRNA 4453   |
| MIR4456   | microRNA 4456   |
| MIR4462   | microRNA 4462   |
| MIR4467   | microRNA 4467   |
| MIR4470   | microRNA 4470   |

|                 |                       |
|-----------------|-----------------------|
| <b>MIR4471</b>  | <b>microRNA 4471</b>  |
| <b>MIR4476</b>  | <b>microRNA 4476</b>  |
| <b>MIR4479</b>  | <b>microRNA 4479</b>  |
| <b>MIR4482</b>  | <b>microRNA 4482</b>  |
| <b>MIR4491</b>  | <b>microRNA 4491</b>  |
| <b>MIR4493</b>  | <b>microRNA 4493</b>  |
| <b>MIR4505</b>  | <b>microRNA 4505</b>  |
| <b>MIR4513</b>  | <b>microRNA 4513</b>  |
| <b>MIR4519</b>  | <b>microRNA 4519</b>  |
| <b>MIR4521</b>  | <b>microRNA 4521</b>  |
| <b>MIR4522</b>  | <b>microRNA 4522</b>  |
| <b>MIR4523</b>  | <b>microRNA 4523</b>  |
| <b>MIR4526</b>  | <b>microRNA 4526</b>  |
| <b>MIR4530</b>  | <b>microRNA 4530</b>  |
| <b>MIR4532</b>  | <b>microRNA 4532</b>  |
| <b>MIR4632</b>  | <b>microRNA 4632</b>  |
| <b>MIR4638</b>  | <b>microRNA 4638</b>  |
| <b>MIR4645</b>  | <b>microRNA 4645</b>  |
| <b>MIR4647</b>  | <b>microRNA 4647</b>  |
| <b>MIR4649</b>  | <b>microRNA 4649</b>  |
| <b>MIR4651</b>  | <b>microRNA 4651</b>  |
| <b>MIR4658</b>  | <b>microRNA 4658</b>  |
| <b>MIR4659A</b> | <b>microRNA 4659a</b> |
| <b>MIR4659B</b> | <b>microRNA 4659b</b> |
| <b>MIR4665</b>  | <b>microRNA 4665</b>  |
| <b>MIR4674</b>  | <b>microRNA 4674</b>  |
| <b>MIR4678</b>  | <b>microRNA 4678</b>  |
| <b>MIR4687</b>  | <b>microRNA 4687</b>  |
| <b>MIR4690</b>  | <b>microRNA 4690</b>  |
| <b>MIR4707</b>  | <b>microRNA 4707</b>  |
| <b>MIR4708</b>  | <b>microRNA 4708</b>  |
| <b>MIR4713</b>  | <b>microRNA 4713</b>  |
| <b>MIR4721</b>  | <b>microRNA 4721</b>  |
| <b>MIR4724</b>  | <b>microRNA 4724</b>  |
| <b>MIR4727</b>  | <b>microRNA 4727</b>  |
| <b>MIR4734</b>  | <b>microRNA 4734</b>  |
| <b>MIR4736</b>  | <b>microRNA 4736</b>  |
| <b>MIR4738</b>  | <b>microRNA 4738</b>  |
| <b>MIR4745</b>  | <b>microRNA 4745</b>  |
| <b>MIR4746</b>  | <b>microRNA 4746</b>  |
| <b>MIR4749</b>  | <b>microRNA 4749</b>  |

|          |                                                                 |
|----------|-----------------------------------------------------------------|
| MIR4751  | microRNA 4751                                                   |
| MIR4754  | microRNA 4754                                                   |
| MIR4757  | microRNA 4757                                                   |
| MIR4767  | microRNA 4767                                                   |
| MIR486-1 | microRNA 486-1                                                  |
| MIR497   | microRNA 497                                                    |
| MIR497HG | mir-497-195 cluster host gene                                   |
| MIR548C  | microRNA 548c                                                   |
| MIR548Z  | microRNA 548z                                                   |
| MIR564   | microRNA 564                                                    |
| MIR567   | microRNA 567                                                    |
| MIR573   | microRNA 573                                                    |
| MIR589   | microRNA 589                                                    |
| MIR600   | microRNA 600                                                    |
| MIR611   | microRNA 611                                                    |
| MIR612   | microRNA 612                                                    |
| MIR623   | microRNA 623                                                    |
| MIR630   | microRNA 630                                                    |
| MIR632   | microRNA 632                                                    |
| MIR636   | microRNA 636                                                    |
| MIR638   | microRNA 638                                                    |
| MIR639   | microRNA 639                                                    |
| MIR641   | microRNA 641                                                    |
| MIR658   | microRNA 658                                                    |
| MIR663A  | microRNA 663a                                                   |
| MIR718   | microRNA 718                                                    |
| MIR759   | microRNA 759                                                    |
| MIR762   | microRNA 762                                                    |
| MIR766   | microRNA 766                                                    |
| MIR92B   | microRNA 92b                                                    |
| MIR933   | microRNA 933                                                    |
| MIRLET7D | microRNA let-7d                                                 |
| MIRLET7I | microRNA let-7i                                                 |
| MIS12    | MIS12 kinetochore complex component                             |
| MIS18A   | MIS18 kinetochore protein A                                     |
| MIS18BP1 | MIS18 binding protein 1                                         |
| MITD1    | MIT, microtubule interacting and transport, domain containing 1 |
| MKKS     | McKusick-Kaufman syndrome                                       |
| MKL1     | megakaryoblastic leukemia (translocation) 1                     |
| MKLN1    | muskelin 1, intracellular mediator containing kelch motifs      |
| MKNK1    | MAP kinase interacting serine/threonine kinase 1                |

|                  |                                                                                                               |
|------------------|---------------------------------------------------------------------------------------------------------------|
| <b>MKNK2</b>     | <b>MAP kinase interacting serine/threonine kinase 2</b>                                                       |
| <b>MKRN2</b>     | <b>makorin ring finger protein 2</b>                                                                          |
| <b>MKS1</b>      | <b>Meckel syndrome, type 1</b>                                                                                |
| <b>MLEC</b>      | <b>malectin</b>                                                                                               |
| <b>MLF2</b>      | <b>myeloid leukemia factor 2</b>                                                                              |
| <b>MLH1</b>      | <b>mutL homolog 1</b>                                                                                         |
| <b>MLH3</b>      | <b>mutL homolog 3</b>                                                                                         |
| <b>MLLT1</b>     | <b>myeloid/lymphoid or mixed-lineage leukemia (trithorax homolog, <i>Drosophila</i>); translocated to, 1</b>  |
| <b>MLLT11</b>    | <b>myeloid/lymphoid or mixed-lineage leukemia (trithorax homolog, <i>Drosophila</i>); translocated to, 11</b> |
| <b>MLLT6</b>     | <b>myeloid/lymphoid or mixed-lineage leukemia (trithorax homolog, <i>Drosophila</i>); translocated to, 6</b>  |
| <b>MLST8</b>     | <b>MTOR associated protein, LST8 homolog (<i>S. cerevisiae</i>)</b>                                           |
| <b>MLX</b>       | <b>MLX, MAX dimerization protein</b>                                                                          |
| <b>MMAA</b>      | <b>methylmalonic aciduria (cobalamin deficiency) cblA type</b>                                                |
| <b>MMAB</b>      | <b>methylmalonic aciduria (cobalamin deficiency) cblB type</b>                                                |
| <b>MMADHC</b>    | <b>methylmalonic aciduria (cobalamin deficiency) cblD type, with homocystinuria</b>                           |
| <b>MMP23B</b>    | <b>matrix metalloproteinase 23B</b>                                                                           |
| <b>MMS19</b>     | <b>MMS19 nucleotide excision repair homolog (<i>S. cerevisiae</i>)</b>                                        |
| <b>MMS22L</b>    | <b>MMS22-like, DNA repair protein</b>                                                                         |
| <b>MNAT1</b>     | <b>MNAT CDK-activating kinase assembly factor 1</b>                                                           |
| <b>MNT</b>       | <b>MAX network transcriptional repressor</b>                                                                  |
| <b>MOB1A</b>     | <b>MOB kinase activator 1A</b>                                                                                |
| <b>MOB3A</b>     | <b>MOB kinase activator 3A</b>                                                                                |
| <b>MOB4</b>      | <b>MOB family member 4, phocein</b>                                                                           |
| <b>MOCS2</b>     | <b>molybdenum cofactor synthesis 2</b>                                                                        |
| <b>MOGAT2</b>    | <b>monoacylglycerol O-acyltransferase 2</b>                                                                   |
| <b>MOGS</b>      | <b>mannosyl-oligosaccharide glucosidase</b>                                                                   |
| <b>MON1A</b>     | <b>MON1 secretory trafficking family member A</b>                                                             |
| <b>MON1B</b>     | <b>MON1 secretory trafficking family member B</b>                                                             |
| <b>MON2</b>      | <b>MON2 homolog (<i>S. cerevisiae</i>)</b>                                                                    |
| <b>MORC3</b>     | <b>MORC family CW-type zinc finger 3</b>                                                                      |
| <b>MORF4L1</b>   | <b>mortality factor 4 like 1</b>                                                                              |
| <b>MORF4L2</b>   | <b>mortality factor 4 like 2</b>                                                                              |
| <b>MOV10</b>     | <b>Mov10 RISC complex RNA helicase</b>                                                                        |
| <b>MPC1</b>      | <b>mitochondrial pyruvate carrier 1</b>                                                                       |
| <b>MPC2</b>      | <b>mitochondrial pyruvate carrier 2</b>                                                                       |
| <b>MPDU1</b>     | <b>mannose-P-dolichol utilization defect 1</b>                                                                |
| <b>MPEG1</b>     | <b>macrophage expressed 1</b>                                                                                 |
| <b>MPHOSPH10</b> | <b>M-phase phosphoprotein 10 (U3 small nucleolar ribonucleoprotein)</b>                                       |
| <b>MPI</b>       | <b>mannose phosphate isomerase</b>                                                                            |



|          |                                                                         |
|----------|-------------------------------------------------------------------------|
| MPLKIP   | M-phase specific PLK1 interacting protein                               |
| MPND     | MPN domain containing                                                   |
| MPP6     | membrane protein, palmitoylated 6 (MAGUK p55 subfamily member 6)        |
| MPPE1    | metallophosphoesterase 1                                                |
| MPV17    | MpV17 mitochondrial inner membrane protein                              |
| MPV17L2  | MPV17 mitochondrial membrane protein-like 2                             |
| MPZL3    | myelin protein zero-like 3                                              |
| MREG     | melanoregulin                                                           |
| MRFAP1   | Morf4 family associated protein 1                                       |
| MRFAP1L1 | Morf4 family associated protein 1-like 1                                |
| MRI1     | methylthioribose-1-phosphate isomerase 1                                |
| MRM1     | mitochondrial rRNA methyltransferase 1 homolog ( <i>S. cerevisiae</i> ) |
| MROH6    | maestro heat-like repeat family member 6                                |
| MROH8    | maestro heat-like repeat family member 8                                |
| MRPL1    | mitochondrial ribosomal protein L1                                      |
| MRPL12   | mitochondrial ribosomal protein L12                                     |
| MRPL13   | mitochondrial ribosomal protein L13                                     |
| MRPL14   | mitochondrial ribosomal protein L14                                     |
| MRPL15   | mitochondrial ribosomal protein L15                                     |
| MRPL17   | mitochondrial ribosomal protein L17                                     |
| MRPL18   | mitochondrial ribosomal protein L18                                     |
| MRPL19   | mitochondrial ribosomal protein L19                                     |
| MRPL2    | mitochondrial ribosomal protein L2                                      |
| MRPL20   | mitochondrial ribosomal protein L20                                     |
| MRPL21   | mitochondrial ribosomal protein L21                                     |
| MRPL24   | mitochondrial ribosomal protein L24                                     |
| MRPL27   | mitochondrial ribosomal protein L27                                     |
| MRPL28   | mitochondrial ribosomal protein L28                                     |
| MRPL3    | mitochondrial ribosomal protein L3                                      |
| MRPL30   | mitochondrial ribosomal protein L30                                     |
| MRPL32   | mitochondrial ribosomal protein L32                                     |
| MRPL34   | mitochondrial ribosomal protein L34                                     |
| MRPL35   | mitochondrial ribosomal protein L35                                     |
| MRPL36   | mitochondrial ribosomal protein L36                                     |
| MRPL38   | mitochondrial ribosomal protein L38                                     |
| MRPL39   | mitochondrial ribosomal protein L39                                     |
| MRPL4    | mitochondrial ribosomal protein L4                                      |
| MRPL40   | mitochondrial ribosomal protein L40                                     |
| MRPL41   | mitochondrial ribosomal protein L41                                     |
| MRPL42   | mitochondrial ribosomal protein L42                                     |
| MRPL44   | mitochondrial ribosomal protein L44                                     |

|           |                                                     |
|-----------|-----------------------------------------------------|
| MRPL45    | mitochondrial ribosomal protein L45                 |
| MRPL46    | mitochondrial ribosomal protein L46                 |
| MRPL47    | mitochondrial ribosomal protein L47                 |
| MRPL48    | mitochondrial ribosomal protein L48                 |
| MRPL49    | mitochondrial ribosomal protein L49                 |
| MRPL51    | mitochondrial ribosomal protein L51                 |
| MRPL53    | mitochondrial ribosomal protein L53                 |
| MRPL54    | mitochondrial ribosomal protein L54                 |
| MRPL55    | mitochondrial ribosomal protein L55                 |
| MRPL57    | mitochondrial ribosomal protein L57                 |
| MRPL9     | mitochondrial ribosomal protein L9                  |
| MRPS10    | mitochondrial ribosomal protein S10                 |
| MRPS11    | mitochondrial ribosomal protein S11                 |
| MRPS12    | mitochondrial ribosomal protein S12                 |
| MRPS14    | mitochondrial ribosomal protein S14                 |
| MRPS15    | mitochondrial ribosomal protein S15                 |
| MRPS16    | mitochondrial ribosomal protein S16                 |
| MRPS17    | mitochondrial ribosomal protein S17                 |
| MRPS18C   | mitochondrial ribosomal protein S18C                |
| MRPS21    | mitochondrial ribosomal protein S21                 |
| MRPS23    | mitochondrial ribosomal protein S23                 |
| MRPS24    | mitochondrial ribosomal protein S24                 |
| MRPS25    | mitochondrial ribosomal protein S25                 |
| MRPS26    | mitochondrial ribosomal protein S26                 |
| MRPS27    | mitochondrial ribosomal protein S27                 |
| MRPS28    | mitochondrial ribosomal protein S28                 |
| MRPS31    | mitochondrial ribosomal protein S31                 |
| MRPS33    | mitochondrial ribosomal protein S33                 |
| MRPS34    | mitochondrial ribosomal protein S34                 |
| MRPS35    | mitochondrial ribosomal protein S35                 |
| MRPS36    | mitochondrial ribosomal protein S36                 |
| MRPS5     | mitochondrial ribosomal protein S5                  |
| MRPS6     | mitochondrial ribosomal protein S6                  |
| MRPS7     | mitochondrial ribosomal protein S7                  |
| MRRF      | mitochondrial ribosome recycling factor             |
| MRT04     | mRNA turnover 4 homolog ( <i>S. cerevisiae</i> )    |
| MRVI1-AS1 | MRVI1 antisense RNA 1                               |
| MS4A1     | membrane-spanning 4-domains, subfamily A, member 1  |
| MS4A10    | membrane-spanning 4-domains, subfamily A, member 10 |
| MS4A6A    | membrane-spanning 4-domains, subfamily A, member 6A |
| MS4A7     | membrane-spanning 4-domains, subfamily A, member 7  |

|        |                                                                                                                                         |
|--------|-----------------------------------------------------------------------------------------------------------------------------------------|
| MSC    | musculin                                                                                                                                |
| MSH2   | mutS homolog 2                                                                                                                          |
| MSH3   | mutS homolog 3                                                                                                                          |
| MSH4   | mutS homolog 4                                                                                                                          |
| MSH6   | mutS homolog 6                                                                                                                          |
| MSL1   | male-specific lethal 1 homolog (Drosophila)                                                                                             |
| MSL2   | male-specific lethal 2 homolog (Drosophila)                                                                                             |
| MSLNL  | mesothelin-like                                                                                                                         |
| MSMO1  | methylsterol monooxygenase 1                                                                                                            |
| MSRB1  | methionine sulfoxide reductase B1                                                                                                       |
| MST1   | macrophage stimulating 1                                                                                                                |
| MST1P2 | macrophage stimulating 1 (hepatocyte growth factor-like) pseudogene 2                                                                   |
| MSTO2P | misato family member 2, pseudogene                                                                                                      |
| MTA2   | metastasis associated 1 family, member 2                                                                                                |
| MTBP   | MDM2 binding protein                                                                                                                    |
| MTCH1  | mitochondrial carrier 1                                                                                                                 |
| MTDH   | metadherin                                                                                                                              |
| MTERF1 | mitochondrial transcription termination factor 1                                                                                        |
| MTERF3 | mitochondrial transcription termination factor 3                                                                                        |
| MTERF4 | mitochondrial transcription termination factor 4                                                                                        |
| MTF1   | metal-regulatory transcription factor 1                                                                                                 |
| MTF2   | metal response element binding transcription factor 2                                                                                   |
| MTFR1L | mitochondrial fission regulator 1-like                                                                                                  |
| MTFR2  | mitochondrial fission regulator 2                                                                                                       |
| MTG1   | mitochondrial ribosome-associated GTPase 1                                                                                              |
| MTG2   | mitochondrial ribosome-associated GTPase 2                                                                                              |
| MTHFD1 | methylenetetrahydrofolate dehydrogenase (NADP+ dependent) 1, methenyltetrahydrofolate cyclohydrolase, formyltetrahydrofolate synthetase |
| MTHFD2 | methylenetetrahydrofolate dehydrogenase (NADP+ dependent) 2, methenyltetrahydrofolate cyclohydrolase                                    |
| MTHFS  | 5,10-methenyltetrahydrofolate synthetase (5-formyltetrahydrofolate cyclo-ligase)                                                        |
| MTIF2  | mitochondrial translational initiation factor 2                                                                                         |
| MTIF3  | mitochondrial translational initiation factor 3                                                                                         |
| MTMR14 | myotubularin related protein 14                                                                                                         |
| MTMR2  | myotubularin related protein 2                                                                                                          |
| MTMR4  | myotubularin related protein 4                                                                                                          |
| MTMR6  | myotubularin related protein 6                                                                                                          |
| MTMR9  | myotubularin related protein 9                                                                                                          |
| MTO1   | mitochondrial tRNA translation optimization 1                                                                                           |
| MTOR   | mechanistic target of rapamycin (serine/threonine kinase)                                                                               |
| MTR    | 5-methyltetrahydrofolate-homocysteine methyltransferase                                                                                 |
| MTRF1  | mitochondrial translational release factor 1                                                                                            |

|          |                                                              |
|----------|--------------------------------------------------------------|
| MTRF1L   | mitochondrial translational release factor 1-like            |
| MTTP     | microsomal triglyceride transfer protein                     |
| MTVR2    | mouse mammary tumor virus receptor homolog 2                 |
| MTX2     | metaxin 2                                                    |
| MTX3     | metaxin 3                                                    |
| MUC1     | mucin 1, cell surface associated                             |
| MUS81    | MUS81 structure-specific endonuclease subunit                |
| MUT      | methylmalonyl CoA mutase                                     |
| MUTYH    | mutY homolog                                                 |
| MVB12A   | multivesicular body subunit 12A                              |
| MVK      | mevalonate kinase                                            |
| MX2      | MX dynamin-like GTPase 2                                     |
| MXD1     | MAX dimerization protein 1                                   |
| MXD3     | MAX dimerization protein 3                                   |
| MYB      | v-myb avian myeloblastosis viral oncogene homolog            |
| MYBBP1A  | MYB binding protein (P160) 1a                                |
| MYBL1    | v-myb avian myeloblastosis viral oncogene homolog-like 1     |
| MYBPC2   | myosin binding protein C, fast type                          |
| MYC      | v-myc avian myelocytomatosis viral oncogene homolog          |
| MYCBP    | MYC binding protein                                          |
| MYCBP2   | MYC binding protein 2, E3 ubiquitin protein ligase           |
| MYD88    | myeloid differentiation primary response 88                  |
| MYH7B    | myosin, heavy chain 7B, cardiac muscle, beta                 |
| MYH9     | myosin, heavy chain 9, non-muscle                            |
| MYL12A   | myosin, light chain 12A, regulatory, non-sarcomeric          |
| MYL12B   | myosin, light chain 12B, regulatory                          |
| MYL5     | myosin, light chain 5, regulatory                            |
| MYL6     | myosin, light chain 6, alkali, smooth muscle and non-muscle  |
| MYL6B    | myosin, light chain 6B, alkali, smooth muscle and non-muscle |
| MYLK-AS1 | MYLK antisense RNA 1                                         |
| MYNN     | myoneurin                                                    |
| MYO15A   | myosin XVA                                                   |
| MYO19    | myosin XIX                                                   |
| MYO1D    | myosin ID                                                    |
| MYO1G    | myosin IG                                                    |
| MYO9A    | myosin IXA                                                   |
| MYO9B    | myosin IXB                                                   |
| MZB1     | marginal zone B and B1 cell-specific protein                 |
| MZF1     | myeloid zinc finger 1                                        |
| MZT1     | mitotic spindle organizing protein 1                         |
| MZT2B    | mitotic spindle organizing protein 2B                        |

|         |                                                                     |
|---------|---------------------------------------------------------------------|
| N4BP1   | NEDD4 binding protein 1                                             |
| N4BP2   | NEDD4 binding protein 2                                             |
| N4BP2L1 | NEDD4 binding protein 2-like 1                                      |
| N4BP2L2 | NEDD4 binding protein 2-like 2                                      |
| N4BP3   | NEDD4 binding protein 3                                             |
| N6AMT2  | N-6 adenine-specific DNA methyltransferase 2 (putative)             |
| NAA15   | N(alpha)-acetyltransferase 15, NatA auxiliary subunit               |
| NAA16   | N(alpha)-acetyltransferase 16, NatA auxiliary subunit               |
| NAA38   | N(alpha)-acetyltransferase 38, NatC auxiliary subunit               |
| NAA50   | N(alpha)-acetyltransferase 50, NatE catalytic subunit               |
| NAB2    | NGFI-A binding protein 2 (EGR1 binding protein 2)                   |
| NABP1   | nucleic acid binding protein 1                                      |
| NACA    | nascent polypeptide-associated complex alpha subunit                |
| NACC1   | nucleus accumbens associated 1, BEN and BTB (POZ) domain containing |
| NADK    | NAD kinase                                                          |
| NAGK    | N-acetylglucosamine kinase                                          |
| NAGLU   | N-acetylglucosaminidase, alpha                                      |
| NAIF1   | nuclear apoptosis inducing factor 1                                 |
| NAMPT   | nicotinamide phosphoribosyltransferase                              |
| NANOS1  | nanos homolog 1 (Drosophila)                                        |
| NANP    | N-acetylneuraminic acid phosphatase                                 |
| NANS    | N-acetylneuraminic acid synthase                                    |
| NAP1L1  | nucleosome assembly protein 1-like 1                                |
| NAPA    | N-ethylmaleimide-sensitive factor attachment protein, alpha         |
| NAPEPLD | N-acyl phosphatidylethanolamine phospholipase D                     |
| NAPRT   | nicotinate phosphoribosyltransferase                                |
| NAPSB   | napsin B aspartic peptidase, pseudogene                             |
| NARF    | nuclear prelamin A recognition factor                               |
| NARS    | asparaginyl-tRNA synthetase                                         |
| NASP    | nuclear autoantigenic sperm protein (histone-binding)               |
| NAT10   | N-acetyltransferase 10 (GCN5-related)                               |
| NAT14   | N-acetyltransferase 14 (GCN5-related, putative)                     |
| NAT6    | N-acetyltransferase 6 (GCN5-related)                                |
| NBN     | nibrin                                                              |
| NBPF1   | neuroblastoma breakpoint family, member 1                           |
| NBR1    | neighbor of BRCA1 gene 1                                            |
| NBR2    | neighbor of BRCA1 gene 2 (non-protein coding)                       |
| NCALD   | neurocalcin delta                                                   |
| NCAPD2  | non-SMC condensin I complex, subunit D2                             |
| NCAPD3  | non-SMC condensin II complex, subunit D3                            |
| NCAPG   | non-SMC condensin I complex, subunit G                              |

|          |                                                                   |
|----------|-------------------------------------------------------------------|
| NCAPG2   | non-SMC condensin II complex, subunit G2                          |
| NCAPH2   | non-SMC condensin II complex, subunit H2                          |
| NCBP1    | nuclear cap binding protein subunit 1, 80kDa                      |
| NCBP2    | nuclear cap binding protein subunit 2, 20kDa                      |
| NCDN     | neurochondrin                                                     |
| NCF2     | neutrophil cytosolic factor 2                                     |
| NCF4     | neutrophil cytosolic factor 4, 40kDa                              |
| NCK1     | NCK adaptor protein 1                                             |
| NCK2     | NCK adaptor protein 2                                             |
| NCKAP1L  | NCK-associated protein 1-like                                     |
| NCKIPSD  | NCK interacting protein with SH3 domain                           |
| NCL      | nucleolin                                                         |
| NCLN     | nicalin                                                           |
| NCMAP    | noncompact myelin associated protein                              |
| NCOA2    | nuclear receptor coactivator 2                                    |
| NCOA3    | nuclear receptor coactivator 3                                    |
| NCOA5    | nuclear receptor coactivator 5                                    |
| NCOA7    | nuclear receptor coactivator 7                                    |
| NCOR1    | nuclear receptor corepressor 1                                    |
| NCOR2    | nuclear receptor corepressor 2                                    |
| NCR2     | natural cytotoxicity triggering receptor 2                        |
| NCRUPAR  | non-protein coding RNA, upstream of F2R/PAR1                      |
| NCSTN    | nicastatin                                                        |
| NDC1     | NDC1 transmembrane nucleoporin                                    |
| NDFIP1   | Nedd4 family interacting protein 1                                |
| NDFIP2   | Nedd4 family interacting protein 2                                |
| NDNL2    | necdin-like 2                                                     |
| NDOR1    | NADPH dependent diflavin oxidoreductase 1                         |
| NDST2    | N-deacetylase/N-sulfotransferase (heparan glucosaminy) 2          |
| NDUFA10  | NADH dehydrogenase (ubiquinone) 1 alpha subcomplex, 10, 42kDa     |
| NDUFA11  | NADH dehydrogenase (ubiquinone) 1 alpha subcomplex, 11, 14.7kDa   |
| NDUFA12  | NADH dehydrogenase (ubiquinone) 1 alpha subcomplex, 12            |
| NDUFA13  | NADH dehydrogenase (ubiquinone) 1 alpha subcomplex, 13            |
| NDUFA2   | NADH dehydrogenase (ubiquinone) 1 alpha subcomplex, 2, 8kDa       |
| NDUFA4   | NDUFA4, mitochondrial complex associated                          |
| NDUFA4L2 | NADH dehydrogenase (ubiquinone) 1 alpha subcomplex, 4-like 2      |
| NDUFA5   | NADH dehydrogenase (ubiquinone) 1 alpha subcomplex, 5             |
| NDUFA6   | NADH dehydrogenase (ubiquinone) 1 alpha subcomplex, 6, 14kDa      |
| NDUFA7   | NADH dehydrogenase (ubiquinone) 1 alpha subcomplex, 7, 14.5kDa    |
| NDUFA9   | NADH dehydrogenase (ubiquinone) 1 alpha subcomplex, 9, 39kDa      |
| NDUFAB1  | NADH dehydrogenase (ubiquinone) 1, alpha/beta subcomplex, 1, 8kDa |

|               |                                                                                   |
|---------------|-----------------------------------------------------------------------------------|
| NDUFAF1       | NADH dehydrogenase (ubiquinone) complex I, assembly factor 1                      |
| NDUFAF3       | NADH dehydrogenase (ubiquinone) complex I, assembly factor 3                      |
| NDUFAF4       | NADH dehydrogenase (ubiquinone) complex I, assembly factor 4                      |
| NDUFAF5       | NADH dehydrogenase (ubiquinone) complex I, assembly factor 5                      |
| NDUFAF6       | NADH dehydrogenase (ubiquinone) complex I, assembly factor 6                      |
| NDUFAF7       | NADH dehydrogenase (ubiquinone) complex I, assembly factor 7                      |
| NDUFB1        | NADH dehydrogenase (ubiquinone) 1 beta subcomplex, 1, 7kDa                        |
| NDUFB10       | NADH dehydrogenase (ubiquinone) 1 beta subcomplex, 10, 22kDa                      |
| NDUFB2        | NADH dehydrogenase (ubiquinone) 1 beta subcomplex, 2, 8kDa                        |
| NDUFB3        | NADH dehydrogenase (ubiquinone) 1 beta subcomplex, 3, 12kDa                       |
| NDUFB5        | NADH dehydrogenase (ubiquinone) 1 beta subcomplex, 5, 16kDa                       |
| NDUFB6        | NADH dehydrogenase (ubiquinone) 1 beta subcomplex, 6, 17kDa                       |
| NDUFB7        | NADH dehydrogenase (ubiquinone) 1 beta subcomplex, 7, 18kDa                       |
| NDUFB9        | NADH dehydrogenase (ubiquinone) 1 beta subcomplex, 9, 22kDa                       |
| NDUFC1        | NADH dehydrogenase (ubiquinone) 1, subcomplex unknown, 1, 6kDa                    |
| NDUFC2        | NADH dehydrogenase (ubiquinone) 1, subcomplex unknown, 2, 14.5kDa                 |
| NDUFC2-KCTD14 | NDUFC2-KCTD14 readthrough                                                         |
| NDUFS1        | NADH dehydrogenase (ubiquinone) Fe-S protein 1, 75kDa (NADH-coenzyme Q reductase) |
| NDUFS3        | NADH dehydrogenase (ubiquinone) Fe-S protein 3, 30kDa (NADH-coenzyme Q reductase) |
| NDUFS5        | NADH dehydrogenase (ubiquinone) Fe-S protein 5, 15kDa (NADH-coenzyme Q reductase) |
| NDUFS6        | NADH dehydrogenase (ubiquinone) Fe-S protein 6, 13kDa (NADH-coenzyme Q reductase) |
| NDUFS7        | NADH dehydrogenase (ubiquinone) Fe-S protein 7, 20kDa (NADH-coenzyme Q reductase) |
| NDUFS8        | NADH dehydrogenase (ubiquinone) Fe-S protein 8, 23kDa (NADH-coenzyme Q reductase) |
| NDUFV3        | NADH dehydrogenase (ubiquinone) flavoprotein 3, 10kDa                             |
| NEAT1         | nuclear paraspeckle assembly transcript 1 (non-protein coding)                    |
| NECAB3        | N-terminal EF-hand calcium binding protein 3                                      |
| NECAP1        | NECAP endocytosis associated 1                                                    |
| NECAP2        | NECAP endocytosis associated 2                                                    |
| NEDD1         | neural precursor cell expressed, developmentally down-regulated 1                 |
| NEDD8         | neural precursor cell expressed, developmentally down-regulated 8                 |
| NEDD8-MDP1    | NEDD8-MDP1 readthrough                                                            |
| NEDD9         | neural precursor cell expressed, developmentally down-regulated 9                 |
| NEIL1         | nei endonuclease VIII-like 1 (E. coli)                                            |
| NEIL3         | nei endonuclease VIII-like 3 (E. coli)                                            |
| NEK1          | NIMA-related kinase 1                                                             |
| NEK10         | NIMA-related kinase 10                                                            |
| NEK4          | NIMA-related kinase 4                                                             |

|         |                                                                                       |
|---------|---------------------------------------------------------------------------------------|
| NEK6    | NIMA-related kinase 6                                                                 |
| NEK8    | NIMA-related kinase 8                                                                 |
| NEK9    | NIMA-related kinase 9                                                                 |
| NELFB   | negative elongation factor complex member B                                           |
| NEMF    | nuclear export mediator factor                                                        |
| NENF    | neudesin neurotrophic factor                                                          |
| NEU1    | sialidase 1 (lysosomal sialidase)                                                     |
| NEU3    | sialidase 3 (membrane sialidase)                                                      |
| NEURL2  | neuralized E3 ubiquitin protein ligase 2                                              |
| NEUROG2 | neurogenin 2                                                                          |
| NFAT5   | nuclear factor of activated T-cells 5, tonicity-responsive                            |
| NFATC3  | nuclear factor of activated T-cells, cytoplasmic, calcineurin-dependent 3             |
| NFATC4  | nuclear factor of activated T-cells, cytoplasmic, calcineurin-dependent 4             |
| NFE2L1  | nuclear factor, erythroid 2-like 1                                                    |
| NFE2L2  | nuclear factor, erythroid 2-like 2                                                    |
| NFKB1   | nuclear factor of kappa light polypeptide gene enhancer in B-cells 1                  |
| NFKB2   | nuclear factor of kappa light polypeptide gene enhancer in B-cells 2 (p49/p100)       |
| NFKBIA  | nuclear factor of kappa light polypeptide gene enhancer in B-cells inhibitor, alpha   |
| NFKBID  | nuclear factor of kappa light polypeptide gene enhancer in B-cells inhibitor, delta   |
| NFKBIE  | nuclear factor of kappa light polypeptide gene enhancer in B-cells inhibitor, epsilon |
| NFKBIL1 | nuclear factor of kappa light polypeptide gene enhancer in B-cells inhibitor-like 1   |
| NFKBIZ  | nuclear factor of kappa light polypeptide gene enhancer in B-cells inhibitor, zeta    |
| NFS1    | NFS1 cysteine desulfurase                                                             |
| NFU1    | NFU1 iron-sulfur cluster scaffold                                                     |
| NFX1    | nuclear transcription factor, X-box binding 1                                         |
| NFYA    | nuclear transcription factor Y, alpha                                                 |
| NFYC    | nuclear transcription factor Y, gamma                                                 |
| NGLY1   | N-glycanase 1                                                                         |
| NGRN    | neugrin, neurite outgrowth associated                                                 |
| NHEJ1   | nonhomologous end-joining factor 1                                                    |
| NHLRC2  | NHL repeat containing 2                                                               |
| NHLRC3  | NHL repeat containing 3                                                               |
| NHP2    | NHP2 ribonucleoprotein                                                                |
| NHP2L1  | NHP2 non-histone chromosome protein 2-like 1 ( <i>S. cerevisiae</i> )                 |
| NICN1   | nicolin 1                                                                             |
| NID1    | nidogen 1                                                                             |
| NIF3L1  | NIF3 NGG1 interacting factor 3-like 1 ( <i>S. cerevisiae</i> )                        |
| NINJ1   | ninjurin 1                                                                            |
| NIP7    | NIP7, nucleolar pre-rRNA processing protein                                           |
| NIPA2   | non imprinted in Prader-Willi/Angelman syndrome 2                                     |
| NIPAL1  | NIPA-like domain containing 1                                                         |



|                  |                                                               |
|------------------|---------------------------------------------------------------|
| <b>NIPBL</b>     | <b>Nipped-B homolog (Drosophila)</b>                          |
| <b>NIPSNAP3A</b> | <b>nipsnap homolog 3A (C. elegans)</b>                        |
| <b>NIT1</b>      | <b>nitrilase 1</b>                                            |
| <b>NKAPP1</b>    | <b>NFKB activating protein pseudogene 1</b>                   |
| <b>NKG7</b>      | <b>natural killer cell granule protein 7</b>                  |
| <b>NKIRAS1</b>   | <b>NFKB inhibitor interacting Ras-like 1</b>                  |
| <b>NKIRAS2</b>   | <b>NFKB inhibitor interacting Ras-like 2</b>                  |
| <b>NKRF</b>      | <b>NFKB repressing factor</b>                                 |
| <b>NKTR</b>      | <b>natural killer cell triggering receptor</b>                |
| <b>NLE1</b>      | <b>notchless homolog 1 (Drosophila)</b>                       |
| <b>NLGN3</b>     | <b>neuroligin 3</b>                                           |
| <b>NLRC3</b>     | <b>NLR family, CARD domain containing 3</b>                   |
| <b>NLRX1</b>     | <b>NLR family member X1</b>                                   |
| <b>NMD3</b>      | <b>NMD3 ribosome export adaptor</b>                           |
| <b>NME1</b>      | <b>NME/NM23 nucleoside diphosphate kinase 1</b>               |
| <b>NME1-NME2</b> | <b>NME1-NME2 readthrough</b>                                  |
| <b>NME2</b>      | <b>NME/NM23 nucleoside diphosphate kinase 2</b>               |
| <b>NME3</b>      | <b>NME/NM23 nucleoside diphosphate kinase 3</b>               |
| <b>NME6</b>      | <b>NME/NM23 nucleoside diphosphate kinase 6</b>               |
| <b>NMI</b>       | <b>N-myc (and STAT) interactor</b>                            |
| <b>NMNAT1</b>    | <b>nicotinamide nucleotide adenylyltransferase 1</b>          |
| <b>NMRAL1</b>    | <b>NmrA-like family domain containing 1</b>                   |
| <b>NMT1</b>      | <b>N-myristoyltransferase 1</b>                               |
| <b>NNT</b>       | <b>nicotinamide nucleotide transhydrogenase</b>               |
| <b>NOA1</b>      | <b>nitric oxide associated 1</b>                              |
| <b>NOB1</b>      | <b>NIN1/RPN12 binding protein 1 homolog (S. cerevisiae)</b>   |
| <b>NOC3L</b>     | <b>nucleolar complex associated 3 homolog (S. cerevisiae)</b> |
| <b>NOC4L</b>     | <b>nucleolar complex associated 4 homolog (S. cerevisiae)</b> |
| <b>NOD2</b>      | <b>nucleotide-binding oligomerization domain containing 2</b> |
| <b>NOL10</b>     | <b>nucleolar protein 10</b>                                   |
| <b>NOL11</b>     | <b>nucleolar protein 11</b>                                   |
| <b>NOL12</b>     | <b>nucleolar protein 12</b>                                   |
| <b>NOL7</b>      | <b>nucleolar protein 7, 27kDa</b>                             |
| <b>NOL8</b>      | <b>nucleolar protein 8</b>                                    |
| <b>NOL9</b>      | <b>nucleolar protein 9</b>                                    |
| <b>NOLC1</b>     | <b>nucleolar and coiled-body phosphoprotein 1</b>             |
| <b>NOM1</b>      | <b>nucleolar protein with MIF4G domain 1</b>                  |
| <b>NOP10</b>     | <b>NOP10 ribonucleoprotein</b>                                |
| <b>NOP14</b>     | <b>NOP14 nucleolar protein</b>                                |
| <b>NOP14-AS1</b> | <b>NOP14 antisense RNA 1</b>                                  |
| <b>NOP16</b>     | <b>NOP16 nucleolar protein</b>                                |

|                 |                                                                                  |
|-----------------|----------------------------------------------------------------------------------|
| <b>NOP2</b>     | <b>NOP2 nucleolar protein</b>                                                    |
| <b>NOP56</b>    | <b>NOP56 ribonucleoprotein</b>                                                   |
| <b>NOP58</b>    | <b>NOP58 ribonucleoprotein</b>                                                   |
| <b>NOP9</b>     | <b>NOP9 nucleolar protein</b>                                                    |
| <b>NOSIP</b>    | <b>nitric oxide synthase interacting protein</b>                                 |
| <b>NOTCH1</b>   | <b>notch 1</b>                                                                   |
| <b>NOTCH2NL</b> | <b>notch 2 N-terminal like</b>                                                   |
| <b>NOVA2</b>    | <b>neuro-oncological ventral antigen 2</b>                                       |
| <b>NOXA1</b>    | <b>NADPH oxidase activator 1</b>                                                 |
| <b>NOXO1</b>    | <b>NADPH oxidase organizer 1</b>                                                 |
| <b>NPAS4</b>    | <b>neuronal PAS domain protein 4</b>                                             |
| <b>NPAT</b>     | <b>nuclear protein, ataxia-telangiectasia locus</b>                              |
| <b>NPB</b>      | <b>neuropeptide B</b>                                                            |
| <b>NPEPL1</b>   | <b>aminopeptidase-like 1</b>                                                     |
| <b>NPL</b>      | <b>N-acetylneuraminate pyruvate lyase (dihydrodipicolinate synthase)</b>         |
| <b>NPLOC4</b>   | <b>nuclear protein localization 4 homolog (S. cerevisiae)</b>                    |
| <b>NPM1</b>     | <b>nucleophosmin (nucleolar phosphoprotein B23, numatrin)</b>                    |
| <b>NPM3</b>     | <b>nucleophosmin/nucleoplasmin 3</b>                                             |
| <b>NPRL2</b>    | <b>nitrogen permease regulator-like 2 (S. cerevisiae)</b>                        |
| <b>NR1D2</b>    | <b>nuclear receptor subfamily 1, group D, member 2</b>                           |
| <b>NR1H2</b>    | <b>nuclear receptor subfamily 1, group H, member 2</b>                           |
| <b>NR1H3</b>    | <b>nuclear receptor subfamily 1, group H, member 3</b>                           |
| <b>NR2C1</b>    | <b>nuclear receptor subfamily 2, group C, member 1</b>                           |
| <b>NR2C2AP</b>  | <b>nuclear receptor 2C2-associated protein</b>                                   |
| <b>NR3C1</b>    | <b>nuclear receptor subfamily 3, group C, member 1 (glucocorticoid receptor)</b> |
| <b>NR4A2</b>    | <b>nuclear receptor subfamily 4, group A, member 2</b>                           |
| <b>NR6A1</b>    | <b>nuclear receptor subfamily 6, group A, member 1</b>                           |
| <b>NRADDP</b>   | <b>neurotrophin receptor associated death domain, pseudogene</b>                 |
| <b>NRAS</b>     | <b>neuroblastoma RAS viral (v-ras) oncogene homolog</b>                          |
| <b>NRBF2</b>    | <b>nuclear receptor binding factor 2</b>                                         |
| <b>NRBP1</b>    | <b>nuclear receptor binding protein 1</b>                                        |
| <b>NRD1</b>     | <b>nardilysin (N-arginine dibasic convertase)</b>                                |
| <b>NRF1</b>     | <b>nuclear respiratory factor 1</b>                                              |
| <b>NRM</b>      | <b>nurim (nuclear envelope membrane protein)</b>                                 |
| <b>NRROS</b>    | <b>negative regulator of reactive oxygen species</b>                             |
| <b>NRXN3</b>    | <b>neurexin 3</b>                                                                |
| <b>NSA2</b>     | <b>NSA2 ribosome biogenesis homolog (S. cerevisiae)</b>                          |
| <b>NSD1</b>     | <b>nuclear receptor binding SET domain protein 1</b>                             |
| <b>NSFL1C</b>   | <b>NSFL1 (p97) cofactor (p47)</b>                                                |
| <b>NSL1</b>     | <b>NSL1, MIS12 kinetochore complex component</b>                                 |
| <b>NSMAF</b>    | <b>neutral sphingomyelinase (N-SMase) activation associated factor</b>           |

|          |                                                                     |
|----------|---------------------------------------------------------------------|
| NSMCE1   | non-SMC element 1 homolog ( <i>S. cerevisiae</i> )                  |
| NSUN2    | NOP2/Sun RNA methyltransferase family, member 2                     |
| NSUN3    | NOP2/Sun domain family, member 3                                    |
| NSUN4    | NOP2/Sun domain family, member 4                                    |
| NSUN5    | NOP2/Sun domain family, member 5                                    |
| NSUN6    | NOP2/Sun domain family, member 6                                    |
| NT5C     | 5', 3'-nucleotidase, cytosolic                                      |
| NT5C2    | 5'-nucleotidase, cytosolic II                                       |
| NT5C3A   | 5'-nucleotidase, cytosolic IIIA                                     |
| NT5DC1   | 5'-nucleotidase domain containing 1                                 |
| NT5DC2   | 5'-nucleotidase domain containing 2                                 |
| NT5DC3   | 5'-nucleotidase domain containing 3                                 |
| NT5E     | 5'-nucleotidase, ecto (CD73)                                        |
| NTM      | neurotrimin                                                         |
| NTRK1    | neurotrophic tyrosine kinase, receptor, type 1                      |
| NUBP1    | nucleotide binding protein 1                                        |
| NUCB2    | nucleobindin 2                                                      |
| NUCKS1   | nuclear casein kinase and cyclin-dependent kinase substrate 1       |
| NUDCD1   | NudC domain containing 1                                            |
| NUDCD2   | NudC domain containing 2                                            |
| NUDCD3   | NudC domain containing 3                                            |
| NUDT1    | nudix (nucleoside diphosphate linked moiety X)-type motif 1         |
| NUDT15   | nudix (nucleoside diphosphate linked moiety X)-type motif 15        |
| NUDT16L1 | nudix (nucleoside diphosphate linked moiety X)-type motif 16-like 1 |
| NUDT17   | nudix (nucleoside diphosphate linked moiety X)-type motif 17        |
| NUDT21   | nudix (nucleoside diphosphate linked moiety X)-type motif 21        |
| NUDT22   | nudix (nucleoside diphosphate linked moiety X)-type motif 22        |
| NUDT3    | nudix (nucleoside diphosphate linked moiety X)-type motif 3         |
| NUDT5    | nudix (nucleoside diphosphate linked moiety X)-type motif 5         |
| NUDT6    | nudix (nucleoside diphosphate linked moiety X)-type motif 6         |
| NUDT8    | nudix (nucleoside diphosphate linked moiety X)-type motif 8         |
| NUDT9    | nudix (nucleoside diphosphate linked moiety X)-type motif 9         |
| NUF2     | NUF2, NDC80 kinetochore complex component                           |
| NUFIP1   | nuclear fragile X mental retardation protein interacting protein 1  |
| NUFIP2   | nuclear fragile X mental retardation protein interacting protein 2  |
| NUMBL    | numb homolog ( <i>Drosophila</i> )-like                             |
| NUP107   | nucleoporin 107kDa                                                  |
| NUP153   | nucleoporin 153kDa                                                  |
| NUP155   | nucleoporin 155kDa                                                  |
| NUP188   | nucleoporin 188kDa                                                  |
| NUP205   | nucleoporin 205kDa                                                  |

|          |                                                                                |
|----------|--------------------------------------------------------------------------------|
| NUP210   | nucleoporin 210kDa                                                             |
| NUP210L  | nucleoporin 210kDa-like                                                        |
| NUP214   | nucleoporin 214kDa                                                             |
| NUP35    | nucleoporin 35kDa                                                              |
| NUP37    | nucleoporin 37kDa                                                              |
| NUP43    | nucleoporin 43kDa                                                              |
| NUP54    | nucleoporin 54kDa                                                              |
| NUP62    | nucleoporin 62kDa                                                              |
| NUP85    | nucleoporin 85kDa                                                              |
| NUP98    | nucleoporin 98kDa                                                              |
| NUPL1    | nucleoporin like 1                                                             |
| NUPL2    | nucleoporin like 2                                                             |
| NUS1     | nuclear undecaprenyl pyrophosphate synthase 1 homolog ( <i>S. cerevisiae</i> ) |
| NUSAP1   | nucleolar and spindle associated protein 1                                     |
| NUTF2    | nuclear transport factor 2                                                     |
| NVL      | nuclear VCP-like                                                               |
| NXF1     | nuclear RNA export factor 1                                                    |
| NXT1     | nuclear transport factor 2-like export factor 1                                |
| NXT2     | nuclear transport factor 2-like export factor 2                                |
| OARD1    | O-acyl-ADP-ribose deacylase 1                                                  |
| OAS2     | 2'-5'-oligoadenylate synthetase 2, 69/71kDa                                    |
| OAZ1     | ornithine decarboxylase antizyme 1                                             |
| OAZ2     | ornithine decarboxylase antizyme 2                                             |
| OAZ3     | ornithine decarboxylase antizyme 3                                             |
| OBFC1    | oligonucleotide/oligosaccharide-binding fold containing 1                      |
| OCEL1    | occludin/ELL domain containing 1                                               |
| OCIAD1   | OCIA domain containing 1                                                       |
| OCLN     | occludin                                                                       |
| ODC1     | ornithine decarboxylase 1                                                      |
| ODF2     | outer dense fiber of sperm tails 2                                             |
| ODF3B    | outer dense fiber of sperm tails 3B                                            |
| OFD1     | oral-facial-digital syndrome 1                                                 |
| OGDH     | oxoglutarate (alpha-ketoglutarate) dehydrogenase (lipoamide)                   |
| OGFOD1   | 2-oxoglutarate and iron-dependent oxygenase domain containing 1                |
| OGFOD2   | 2-oxoglutarate and iron-dependent oxygenase domain containing 2                |
| OGG1     | 8-oxoguanine DNA glycosylase                                                   |
| OGT      | O-linked N-acetylglucosamine (GlcNAc) transferase                              |
| OIP5     | Opa interacting protein 5                                                      |
| OIP5-AS1 | OIP5 antisense RNA 1                                                           |
| OLA1     | Obg-like ATPase 1                                                              |
| OLFML3   | olfactomedin-like 3                                                            |

|          |                                                                      |
|----------|----------------------------------------------------------------------|
| OLMALINC | oligodendrocyte maturation-associated long intergenic non-coding RNA |
| OPA1     | optic atrophy 1 (autosomal dominant)                                 |
| OR2G6    | olfactory receptor, family 2, subfamily G, member 6                  |
| OR2L13   | olfactory receptor, family 2, subfamily L, member 13                 |
| ORAI1    | ORAI calcium release-activated calcium modulator 1                   |
| ORAI3    | ORAI calcium release-activated calcium modulator 3                   |
| ORAOV1   | oral cancer overexpressed 1                                          |
| ORC1     | origin recognition complex, subunit 1                                |
| ORC2     | origin recognition complex, subunit 2                                |
| ORC3     | origin recognition complex, subunit 3                                |
| ORC4     | origin recognition complex, subunit 4                                |
| ORC5     | origin recognition complex, subunit 5                                |
| ORMDL1   | ORMDL sphingolipid biosynthesis regulator 1                          |
| ORMDL2   | ORMDL sphingolipid biosynthesis regulator 2                          |
| ORMDL3   | ORMDL sphingolipid biosynthesis regulator 3                          |
| OS9      | osteosarcoma amplified 9, endoplasmic reticulum lectin               |
| OSBPL3   | oxysterol binding protein-like 3                                     |
| OSBPL8   | oxysterol binding protein-like 8                                     |
| OSGEP    | O-sialoglycoprotein endopeptidase                                    |
| OSGEPL1  | O-sialoglycoprotein endopeptidase-like 1                             |
| OSM      | oncostatin M                                                         |
| OSR2     | odd-skipped related transcription factor 2                           |
| OST4     | oligosaccharyltransferase 4 homolog ( <i>S. cerevisiae</i> )         |
| OTUB1    | OTU deubiquitinase, ubiquitin aldehyde binding 1                     |
| OTUD6B   | OTU domain containing 6B                                             |
| OTUD7B   | OTU deubiquitinase 7B                                                |
| OTULIN   | OTU deubiquitinase with linear linkage specificity                   |
| OVCA2    | ovarian tumor suppressor candidate 2                                 |
| OXA1L    | oxidase (cytochrome c) assembly 1-like                               |
| OXCT1    | 3-oxoacid CoA transferase 1                                          |
| OXL1     | oxidoreductase-like domain containing 1                              |
| OXNAD1   | oxidoreductase NAD-binding domain containing 1                       |
| OXSM     | 3-oxoacyl-ACP synthase, mitochondrial                                |
| OXS1     | oxidative stress responsive 1                                        |
| P2RX2    | purinergic receptor P2X, ligand gated ion channel, 2                 |
| P2RY11   | purinergic receptor P2Y, G-protein coupled, 11                       |
| P2RY12   | purinergic receptor P2Y, G-protein coupled, 12                       |
| P2RY6    | pyrimidinergic receptor P2Y, G-protein coupled, 6                    |
| P2RY8    | purinergic receptor P2Y, G-protein coupled, 8                        |
| P3H1     | prolyl 3-hydroxylase 1                                               |
| P3H2     | prolyl 3-hydroxylase 2                                               |

|          |                                                                                                      |
|----------|------------------------------------------------------------------------------------------------------|
| P4HA1    | prolyl 4-hydroxylase, alpha polypeptide I                                                            |
| P4HB     | prolyl 4-hydroxylase, beta polypeptide                                                               |
| P4HTM    | prolyl 4-hydroxylase, transmembrane (endoplasmic reticulum)                                          |
| PA2G4    | proliferation-associated 2G4, 38kDa                                                                  |
| PAAF1    | proteasomal ATPase-associated factor 1                                                               |
| PABPC1   | poly(A) binding protein, cytoplasmic 1                                                               |
| PABPC1L  | poly(A) binding protein, cytoplasmic 1-like                                                          |
| PABPC4   | poly(A) binding protein, cytoplasmic 4 (inducible form)                                              |
| PABPN1   | poly(A) binding protein, nuclear 1                                                                   |
| PACS1    | phosphofurin acidic cluster sorting protein 1                                                        |
| PACS2    | phosphofurin acidic cluster sorting protein 2                                                        |
| PACSN2   | protein kinase C and casein kinase substrate in neurons 2                                            |
| PAF1     | Paf1, RNA polymerase II associated factor, homolog ( <i>S. cerevisiae</i> )                          |
| PAFAH1B2 | platelet-activating factor acetylhydrolase 1b, catalytic subunit 2 (30kDa)                           |
| PAFAH1B3 | platelet-activating factor acetylhydrolase 1b, catalytic subunit 3 (29kDa)                           |
| PAFAH2   | platelet-activating factor acetylhydrolase 2, 40kDa                                                  |
| PAGR1    | PAXIP1 associated glutamate-rich protein 1                                                           |
| PAICS    | phosphoribosylaminoimidazole carboxylase, phosphoribosylaminoimidazole succinocarboxamide synthetase |
| PAIP2    | poly(A) binding protein interacting protein 2                                                        |
| PAK1IP1  | PAK1 interacting protein 1                                                                           |
| PAK2     | p21 protein (Cdc42/Rac)-activated kinase 2                                                           |
| PALB2    | partner and localizer of BRCA2                                                                       |
| PALD1    | phosphatase domain containing, paladin 1                                                             |
| PAM16    | presequence translocase-associated motor 16 homolog ( <i>S. cerevisiae</i> )                         |
| PAN2     | PAN2 poly(A) specific ribonuclease subunit                                                           |
| PAN3     | PAN3 poly(A) specific ribonuclease subunit                                                           |
| PAN3-AS1 | PAN3 antisense RNA 1                                                                                 |
| PANK1    | pantothenate kinase 1                                                                                |
| PANK2    | pantothenate kinase 2                                                                                |
| PANK3    | pantothenate kinase 3                                                                                |
| PANX1    | pannexin 1                                                                                           |
| PAPD5    | PAP associated domain containing 5                                                                   |
| PAPD7    | PAP associated domain containing 7                                                                   |
| PAQR4    | progesterone and adipoQ receptor family member IV                                                    |
| PAQR6    | progesterone and adipoQ receptor family member VI                                                    |
| PAQR8    | progesterone and adipoQ receptor family member VIII                                                  |
| PARD6A   | par-6 family cell polarity regulator alpha                                                           |
| PARK7    | parkinson protein 7                                                                                  |
| PARL     | presenilin associated, rhomboid-like                                                                 |
| PARP15   | poly (ADP-ribose) polymerase family, member 15                                                       |
| PARP2    | poly (ADP-ribose) polymerase 2                                                                       |

|           |                                                                                                              |
|-----------|--------------------------------------------------------------------------------------------------------------|
| PARP3     | poly (ADP-ribose) polymerase family, member 3                                                                |
| PARP9     | poly (ADP-ribose) polymerase family, member 9                                                                |
| PARPBP    | PARP1 binding protein                                                                                        |
| PARVG     | parvin, gamma                                                                                                |
| PATL1     | protein associated with topoisomerase II homolog 1 (yeast)                                                   |
| PATZ1     | POZ (BTB) and AT hook containing zinc finger 1                                                               |
| PAX5      | paired box 5                                                                                                 |
| PAXBP1    | PAX3 and PAX7 binding protein 1                                                                              |
| PAXIP1    | PAX interacting (with transcription-activation domain) protein 1                                             |
| PBLD      | phenazine biosynthesis-like protein domain containing                                                        |
| PBRM1     | polybromo 1                                                                                                  |
| PBX2      | pre-B-cell leukemia homeobox 2                                                                               |
| PBX4      | pre-B-cell leukemia homeobox 4                                                                               |
| PBXIP1    | pre-B-cell leukemia homeobox interacting protein 1                                                           |
| PCBD2     | pterin-4 alpha-carbinolamine dehydratase/dimerization cofactor of hepatocyte nuclear factor 1 alpha (TCF1) 2 |
| PCBP1     | poly(rC) binding protein 1                                                                                   |
| PCBP1-AS1 | PCBP1 antisense RNA 1                                                                                        |
| PCBP2     | poly(rC) binding protein 2                                                                                   |
| PCCB      | propionyl CoA carboxylase, beta polypeptide                                                                  |
| PCED1B    | PC-esterase domain containing 1B                                                                             |
| PCF11     | PCF11 cleavage and polyadenylation factor subunit                                                            |
| PCGF1     | polycomb group ring finger 1                                                                                 |
| PCGF2     | polycomb group ring finger 2                                                                                 |
| PCID2     | PCI domain containing 2                                                                                      |
| PCIF1     | PDX1 C-terminal inhibiting factor 1                                                                          |
| PCK2      | phosphoenolpyruvate carboxykinase 2 (mitochondrial)                                                          |
| PCM1      | pericentriolar material 1                                                                                    |
| PCMTD1    | protein-L-isoaspartate (D-aspartate) O-methyltransferase domain containing 1                                 |
| PCNA      | proliferating cell nuclear antigen                                                                           |
| PCNA-AS1  | PCNA antisense RNA 1                                                                                         |
| PCNP      | PEST proteolytic signal containing nuclear protein                                                           |
| PCNT      | pericentrin                                                                                                  |
| PCNXL3    | pecanex-like 3 (Drosophila)                                                                                  |
| PCNXL4    | pecanex-like 4 (Drosophila)                                                                                  |
| PCSK7     | proprotein convertase subtilisin/kexin type 7                                                                |
| PCYT1A    | phosphate cytidyltransferase 1, choline, alpha                                                               |
| PCYT2     | phosphate cytidyltransferase 2, ethanolamine                                                                 |
| PDAP1     | PDGFA associated protein 1                                                                                   |
| PDCD1     | programmed cell death 1                                                                                      |
| PDCD10    | programmed cell death 10                                                                                     |
| PDCD1LG2  | programmed cell death 1 ligand 2                                                                             |

|         |                                                               |
|---------|---------------------------------------------------------------|
| PDCD2L  | programmed cell death 2-like                                  |
| PDCD4   | programmed cell death 4 (neoplastic transformation inhibitor) |
| PDCD5   | programmed cell death 5                                       |
| PDCD6   | programmed cell death 6                                       |
| PDCD6IP | programmed cell death 6 interacting protein                   |
| PDCL    | phosducin-like                                                |
| PDDC1   | Parkinson disease 7 domain containing 1                       |
| PDE12   | phosphodiesterase 12                                          |
| PDE1B   | phosphodiesterase 1B, calmodulin-dependent                    |
| PDE4A   | phosphodiesterase 4A, cAMP-specific                           |
| PDE7A   | phosphodiesterase 7A                                          |
| PDE8A   | phosphodiesterase 8A                                          |
| PDE9A   | phosphodiesterase 9A                                          |
| PDF     | peptide deformylase (mitochondrial)                           |
| PDIA4   | protein disulfide isomerase family A, member 4                |
| PDIA6   | protein disulfide isomerase family A, member 6                |
| PDIK1L  | PDLIM1 interacting kinase 1 like                              |
| PDS5A   | PDS5 cohesin associated factor A                              |
| PDSS2   | prenyl (decaprenyl) diphosphate synthase, subunit 2           |
| PDXDC1  | pyridoxal-dependent decarboxylase domain containing 1         |
| PDXP    | pyridoxal (pyridoxine, vitamin B6) phosphatase                |
| PEA15   | phosphoprotein enriched in astrocytes 15                      |
| PEF1    | penta-EF-hand domain containing 1                             |
| PEMT    | phosphatidylethanolamine N-methyltransferase                  |
| PER1    | period circadian clock 1                                      |
| PET100  | PET100 homolog ( <i>S. cerevisiae</i> )                       |
| PET117  | PET117 homolog ( <i>S. cerevisiae</i> )                       |
| PEX11B  | peroxisomal biogenesis factor 11 beta                         |
| PEX12   | peroxisomal biogenesis factor 12                              |
| PEX13   | peroxisomal biogenesis factor 13                              |
| PEX14   | peroxisomal biogenesis factor 14                              |
| PEX16   | peroxisomal biogenesis factor 16                              |
| PEX19   | peroxisomal biogenesis factor 19                              |
| PEX2    | peroxisomal biogenesis factor 2                               |
| PEX3    | peroxisomal biogenesis factor 3                               |
| PEX6    | peroxisomal biogenesis factor 6                               |
| PFAS    | phosphoribosylformylglycinamide synthase                      |
| PFDN2   | prefoldin subunit 2                                           |
| PFDN4   | prefoldin subunit 4                                           |
| PFDN5   | prefoldin subunit 5                                           |
| PFKL    | phosphofructokinase, liver                                    |



|          |                                                         |
|----------|---------------------------------------------------------|
| PFKM     | phosphofructokinase, muscle                             |
| PFN4     | profilin family, member 4                               |
| PGAM1    | phosphoglycerate mutase 1 (brain)                       |
| PGAM2    | phosphoglycerate mutase 2 (muscle)                      |
| PGAM5    | phosphoglycerate mutase family member 5                 |
| PGAP1    | post-GPI attachment to proteins 1                       |
| PGAP2    | post-GPI attachment to proteins 2                       |
| PGBD2    | piggyBac transposable element derived 2                 |
| PGBD4    | piggyBac transposable element derived 4                 |
| PGD      | phosphogluconate dehydrogenase                          |
| PGGT1B   | protein geranylgeranyltransferase type I, beta subunit  |
| PGLS     | 6-phosphogluconolactonase                               |
| PGM1     | phosphoglucomutase 1                                    |
| PGM2     | phosphoglucomutase 2                                    |
| PGP      | phosphoglycolate phosphatase                            |
| PGRMC2   | progesterone receptor membrane component 2              |
| PHACTR4  | phosphatase and actin regulator 4                       |
| PHAX     | phosphorylated adaptor for RNA export                   |
| PHB2     | prohibitin 2                                            |
| PHC3     | polyhomeotic homolog 3 (Drosophila)                     |
| PHF1     | PHD finger protein 1                                    |
| PHF11    | PHD finger protein 11                                   |
| PHF12    | PHD finger protein 12                                   |
| PHF19    | PHD finger protein 19                                   |
| PHF2     | PHD finger protein 2                                    |
| PHF21A   | PHD finger protein 21A                                  |
| PHF23    | PHD finger protein 23                                   |
| PHF5A    | PHD finger protein 5A                                   |
| PHF8     | PHD finger protein 8                                    |
| PHIP     | pleckstrin homology domain interacting protein          |
| PHKG2    | phosphorylase kinase, gamma 2 (testis)                  |
| PHLDA1   | pleckstrin homology-like domain, family A, member 1     |
| PHLPP1   | PH domain and leucine rich repeat protein phosphatase 1 |
| PHOSPHO1 | phosphatase, orphan 1                                   |
| PHPT1    | phosphohistidine phosphatase 1                          |
| PHTF1    | putative homeodomain transcription factor 1             |
| PHTF2    | putative homeodomain transcription factor 2             |
| PI4KA    | phosphatidylinositol 4-kinase, catalytic, alpha         |
| PIAS1    | protein inhibitor of activated STAT, 1                  |
| PIAS3    | protein inhibitor of activated STAT, 3                  |
| PIBF1    | progesterone immunomodulatory binding factor 1          |

|            |                                                                         |
|------------|-------------------------------------------------------------------------|
| PICALM     | phosphatidylinositol binding clathrin assembly protein                  |
| PIF1       | PIF1 5'-to-3' DNA helicase                                              |
| PIGB       | phosphatidylinositol glycan anchor biosynthesis, class B                |
| PIGC       | phosphatidylinositol glycan anchor biosynthesis, class C                |
| PIGG       | phosphatidylinositol glycan anchor biosynthesis, class G                |
| PIGK       | phosphatidylinositol glycan anchor biosynthesis, class K                |
| PIGL       | phosphatidylinositol glycan anchor biosynthesis, class L                |
| PIGO       | phosphatidylinositol glycan anchor biosynthesis, class O                |
| PIGQ       | phosphatidylinositol glycan anchor biosynthesis, class Q                |
| PIGT       | phosphatidylinositol glycan anchor biosynthesis, class T                |
| PIGU       | phosphatidylinositol glycan anchor biosynthesis, class U                |
| PIGV       | phosphatidylinositol glycan anchor biosynthesis, class V                |
| PIGW       | phosphatidylinositol glycan anchor biosynthesis, class W                |
| PIGX       | phosphatidylinositol glycan anchor biosynthesis, class X                |
| PIH1D1     | PIH1 domain containing 1                                                |
| PIK3CA     | phosphatidylinositol-4,5-bisphosphate 3-kinase, catalytic subunit alpha |
| PIK3CD     | phosphatidylinositol-4,5-bisphosphate 3-kinase, catalytic subunit delta |
| PIK3CD-AS1 | PIK3CD antisense RNA 1                                                  |
| PIK3CG     | phosphatidylinositol-4,5-bisphosphate 3-kinase, catalytic subunit gamma |
| PIK3IP1    | phosphoinositide-3-kinase interacting protein 1                         |
| PIK3R1     | phosphoinositide-3-kinase, regulatory subunit 1 (alpha)                 |
| PIK3R2     | phosphoinositide-3-kinase, regulatory subunit 2 (beta)                  |
| PIK3R3     | phosphoinositide-3-kinase, regulatory subunit 3 (gamma)                 |
| PIK3R5     | phosphoinositide-3-kinase, regulatory subunit 5                         |
| PIK3R6     | phosphoinositide-3-kinase, regulatory subunit 6                         |
| PIKFYVE    | phosphoinositide kinase, FYVE finger containing                         |
| PILRB      | paired immunoglobulin-like type 2 receptor beta                         |
| PIM2       | Pim-2 proto-oncogene, serine/threonine kinase                           |
| PIM3       | Pim-3 proto-oncogene, serine/threonine kinase                           |
| PIN1       | peptidylprolyl cis/trans isomerase, NIMA-interacting 1                  |
| PINX1      | PIN2/TERF1 interacting, telomerase inhibitor 1                          |
| PIP4K2B    | phosphatidylinositol-5-phosphate 4-kinase, type II, beta                |
| PIP4K2C    | phosphatidylinositol-5-phosphate 4-kinase, type II, gamma               |
| PIP5K1A    | phosphatidylinositol-4-phosphate 5-kinase, type I, alpha                |
| PIP5K1B    | phosphatidylinositol-4-phosphate 5-kinase, type I, beta                 |
| PIP5KL1    | phosphatidylinositol-4-phosphate 5-kinase-like 1                        |
| PISD       | phosphatidylserine decarboxylase                                        |
| PITPNB     | phosphatidylinositol transfer protein, beta                             |
| PITPNC1    | phosphatidylinositol transfer protein, cytoplasmic 1                    |
| PITPNM1    | phosphatidylinositol transfer protein, membrane-associated 1            |
| PJA2       | praja ring finger 2, E3 ubiquitin protein ligase                        |

|           |                                                                                              |
|-----------|----------------------------------------------------------------------------------------------|
| PKD1L1    | polycystic kidney disease 1 like 1                                                           |
| PKD2L2    | polycystic kidney disease 2-like 2                                                           |
| PKIB      | protein kinase (cAMP-dependent, catalytic) inhibitor beta                                    |
| PKM       | pyruvate kinase, muscle                                                                      |
| PKN2      | protein kinase N2                                                                            |
| PLA1A     | phospholipase A1 member A                                                                    |
| PLA2G4F   | phospholipase A2, group IVF                                                                  |
| PLA2G6    | phospholipase A2, group VI (cytosolic, calcium-independent)                                  |
| PLAA      | phospholipase A2-activating protein                                                          |
| PLAG1     | pleiomorphic adenoma gene 1                                                                  |
| PLAGL1    | pleiomorphic adenoma gene-like 1                                                             |
| PLAU      | plasminogen activator, urokinase                                                             |
| PLCXD2    | phosphatidylinositol-specific phospholipase C, X domain containing 2                         |
| PLD3      | phospholipase D family, member 3                                                             |
| PLD4      | phospholipase D family, member 4                                                             |
| PLD6      | phospholipase D family, member 6                                                             |
| PLEC      | plectin                                                                                      |
| PLEK      | pleckstrin                                                                                   |
| PLEKHA1   | pleckstrin homology domain containing, family A (phosphoinositide binding specific) member 1 |
| PLEKHA2   | pleckstrin homology domain containing, family A (phosphoinositide binding specific) member 2 |
| PLEKHA3   | pleckstrin homology domain containing, family A (phosphoinositide binding specific) member 3 |
| PLEKHA8P1 | pleckstrin homology domain containing, family A member 8 pseudogene 1                        |
| PLEKHB2   | pleckstrin homology domain containing, family B (evectins) member 2                          |
| PLEKHG2   | pleckstrin homology domain containing, family G (with RhoGef domain) member 2                |
| PLEKHG4   | pleckstrin homology domain containing, family G (with RhoGef domain) member 4                |
| PLEKHH3   | pleckstrin homology domain containing, family H (with MyTH4 domain) member 3                 |
| PLEKHJ1   | pleckstrin homology domain containing, family J member 1                                     |
| PLEKHM3   | pleckstrin homology domain containing, family M, member 3                                    |
| PLEKHO1   | pleckstrin homology domain containing, family O member 1                                     |
| PLGRKT    | plasminogen receptor, C-terminal lysine transmembrane protein                                |
| PLK1      | polo-like kinase 1                                                                           |
| PLK3      | polo-like kinase 3                                                                           |
| PLK4      | polo-like kinase 4                                                                           |
| PLOD1     | procollagen-lysine, 2-oxoglutarate 5-dioxygenase 1                                           |
| PLRG1     | pleiotropic regulator 1                                                                      |
| PLSCR3    | phospholipid scramblase 3                                                                    |
| PLXNB2    | plexin B2                                                                                    |
| PLXNC1    | plexin C1                                                                                    |
| PMAIP1    | phorbol-12-myristate-13-acetate-induced protein 1                                            |

|              |                                                                   |
|--------------|-------------------------------------------------------------------|
| PMCH         | pro-melanin-concentrating hormone                                 |
| PMF1         | polyamine-modulated factor 1                                      |
| PMF1-BGLAP   | PMF1-BGLAP readthrough                                            |
| PMM1         | phosphomannomutase 1                                              |
| PMPCA        | peptidase (mitochondrial processing) alpha                        |
| PMS1         | PMS1 postmeiotic segregation increased 1 ( <i>S. cerevisiae</i> ) |
| PMS2         | PMS2 postmeiotic segregation increased 2 ( <i>S. cerevisiae</i> ) |
| PMS2P1       | postmeiotic segregation increased 2 pseudogene 1                  |
| PMS2P4       | postmeiotic segregation increased 2 pseudogene 4                  |
| PMVK         | phosphomevalonate kinase                                          |
| PNISR        | PNN-interacting serine/arginine-rich protein                      |
| PNKD         | paroxysmal nonkinesigenic dyskinesia                              |
| PNKP         | polynucleotide kinase 3'-phosphatase                              |
| PNMA1        | paraneoplastic Ma antigen 1                                       |
| PNN          | pinin, desmosome associated protein                               |
| PNO1         | partner of NOB1 homolog ( <i>S. cerevisiae</i> )                  |
| PNP          | purine nucleoside phosphorylase                                   |
| PNPLA2       | patatin-like phospholipase domain containing 2                    |
| PNPLA4       | patatin-like phospholipase domain containing 4                    |
| PNPLA6       | patatin-like phospholipase domain containing 6                    |
| PNPLA7       | patatin-like phospholipase domain containing 7                    |
| PNPLA8       | patatin-like phospholipase domain containing 8                    |
| PNPT1        | polyribonucleotide nucleotidyltransferase 1                       |
| PNRC1        | proline-rich nuclear receptor coactivator 1                       |
| PNRC2        | proline-rich nuclear receptor coactivator 2                       |
| POC1A        | POC1 centriolar protein A                                         |
| POC1B        | POC1 centriolar protein B                                         |
| POC1B-GALNT4 | POC1B-GALNT4 readthrough                                          |
| POC5         | POC5 centriolar protein                                           |
| POGLUT1      | protein O-glucosyltransferase 1                                   |
| POLA2        | polymerase (DNA directed), alpha 2, accessory subunit             |
| POLB         | polymerase (DNA directed), beta                                   |
| POLD1        | polymerase (DNA directed), delta 1, catalytic subunit             |
| POLD2        | polymerase (DNA directed), delta 2, accessory subunit             |
| POLD3        | polymerase (DNA-directed), delta 3, accessory subunit             |
| POLD4        | polymerase (DNA-directed), delta 4, accessory subunit             |
| POLDIP3      | polymerase (DNA-directed), delta interacting protein 3            |
| POLE         | polymerase (DNA directed), epsilon, catalytic subunit             |
| POLE2        | polymerase (DNA directed), epsilon 2, accessory subunit           |
| POLE3        | polymerase (DNA directed), epsilon 3, accessory subunit           |
| POLE4        | polymerase (DNA-directed), epsilon 4, accessory subunit           |

|         |                                                                                |
|---------|--------------------------------------------------------------------------------|
| POLG    | polymerase (DNA directed), gamma                                               |
| POLG2   | polymerase (DNA directed), gamma 2, accessory subunit                          |
| POLH    | polymerase (DNA directed), eta                                                 |
| POLI    | polymerase (DNA directed) iota                                                 |
| POLM    | polymerase (DNA directed), mu                                                  |
| POLR1A  | polymerase (RNA) I polypeptide A, 194kDa                                       |
| POLR1B  | polymerase (RNA) I polypeptide B, 128kDa                                       |
| POLR1C  | polymerase (RNA) I polypeptide C, 30kDa                                        |
| POLR2A  | polymerase (RNA) II (DNA directed) polypeptide A, 220kDa                       |
| POLR2B  | polymerase (RNA) II (DNA directed) polypeptide B, 140kDa                       |
| POLR2C  | polymerase (RNA) II (DNA directed) polypeptide C, 33kDa                        |
| POLR2F  | polymerase (RNA) II (DNA directed) polypeptide F                               |
| POLR2G  | polymerase (RNA) II (DNA directed) polypeptide G                               |
| POLR2H  | polymerase (RNA) II (DNA directed) polypeptide H                               |
| POLR2I  | polymerase (RNA) II (DNA directed) polypeptide I, 14.5kDa                      |
| POLR2J4 | polymerase (RNA) II (DNA directed) polypeptide J4, pseudogene                  |
| POLR2K  | polymerase (RNA) II (DNA directed) polypeptide K, 7.0kDa                       |
| POLR2L  | polymerase (RNA) II (DNA directed) polypeptide L, 7.6kDa                       |
| POLR3A  | polymerase (RNA) III (DNA directed) polypeptide A, 155kDa                      |
| POLR3B  | polymerase (RNA) III (DNA directed) polypeptide B                              |
| POLR3C  | polymerase (RNA) III (DNA directed) polypeptide C (62kD)                       |
| POLR3D  | polymerase (RNA) III (DNA directed) polypeptide D, 44kDa                       |
| POLR3E  | polymerase (RNA) III (DNA directed) polypeptide E (80kD)                       |
| POLR3G  | polymerase (RNA) III (DNA directed) polypeptide G (32kD)                       |
| POLR3H  | polymerase (RNA) III (DNA directed) polypeptide H (22.9kD)                     |
| POLR3K  | polymerase (RNA) III (DNA directed) polypeptide K, 12.3 kDa                    |
| POLRMT  | polymerase (RNA) mitochondrial (DNA directed)                                  |
| POM121C | POM121 transmembrane nucleoporin C                                             |
| POMP    | proteasome maturation protein                                                  |
| POMT1   | protein-O-mannosyltransferase 1                                                |
| PON2    | paraoxonase 2                                                                  |
| POP4    | processing of precursor 4, ribonuclease P/MRP subunit ( <i>S. cerevisiae</i> ) |
| POP5    | processing of precursor 5, ribonuclease P/MRP subunit ( <i>S. cerevisiae</i> ) |
| POP7    | processing of precursor 7, ribonuclease P/MRP subunit ( <i>S. cerevisiae</i> ) |
| POR     | P450 (cytochrome) oxidoreductase                                               |
| POT1    | protection of telomeres 1                                                      |
| POU2AF1 | POU class 2 associating factor 1                                               |
| POU2F1  | POU class 2 homeobox 1                                                         |
| POU2F2  | POU class 2 homeobox 2                                                         |
| POU2F3  | POU class 2 homeobox 3                                                         |
| PP7080  | uncharacterized LOC25845                                                       |

|             |                                                                                                           |
|-------------|-----------------------------------------------------------------------------------------------------------|
| PPA2        | pyrophosphatase (inorganic) 2                                                                             |
| PPAN        | peter pan homolog (Drosophila)                                                                            |
| PPAN-P2RY11 | PPAN-P2RY11 readthrough                                                                                   |
| PPAPDC1B    | phosphatidic acid phosphatase type 2 domain containing 1B                                                 |
| PPARGC1B    | peroxisome proliferator-activated receptor gamma, coactivator 1 beta                                      |
| PPAT        | phosphoribosyl pyrophosphate amidotransferase                                                             |
| PPCDC       | phosphopantothenoylcysteine decarboxylase                                                                 |
| PPCS        | phosphopantothenoylcysteine synthetase                                                                    |
| PPFIA3      | protein tyrosine phosphatase, receptor type, f polypeptide (PTPRF), interacting protein (liprin), alpha 3 |
| PPFIBP2     | PTPRF interacting protein, binding protein 2 (liprin beta 2)                                              |
| PPIA        | peptidylprolyl isomerase A (cyclophilin A)                                                                |
| PPIB        | peptidylprolyl isomerase B (cyclophilin B)                                                                |
| PPID        | peptidylprolyl isomerase D                                                                                |
| PPIG        | peptidylprolyl isomerase G (cyclophilin G)                                                                |
| PPIH        | peptidylprolyl isomerase H (cyclophilin H)                                                                |
| PPIL2       | peptidylprolyl isomerase (cyclophilin)-like 2                                                             |
| PPIL3       | peptidylprolyl isomerase (cyclophilin)-like 3                                                             |
| PPIL4       | peptidylprolyl isomerase (cyclophilin)-like 4                                                             |
| PPM1B       | protein phosphatase, Mg <sup>2+</sup> /Mn <sup>2+</sup> dependent, 1B                                     |
| PPM1D       | protein phosphatase, Mg <sup>2+</sup> /Mn <sup>2+</sup> dependent, 1D                                     |
| PPM1G       | protein phosphatase, Mg <sup>2+</sup> /Mn <sup>2+</sup> dependent, 1G                                     |
| PPM1K       | protein phosphatase, Mg <sup>2+</sup> /Mn <sup>2+</sup> dependent, 1K                                     |
| PPM1M       | protein phosphatase, Mg <sup>2+</sup> /Mn <sup>2+</sup> dependent, 1M                                     |
| PPME1       | protein phosphatase methylesterase 1                                                                      |
| PPOX        | protoporphyrinogen oxidase                                                                                |
| PPP1CA      | protein phosphatase 1, catalytic subunit, alpha isozyme                                                   |
| PPP1CB      | protein phosphatase 1, catalytic subunit, beta isozyme                                                    |
| PPP1R12A    | protein phosphatase 1, regulatory subunit 12A                                                             |
| PPP1R14B    | protein phosphatase 1, regulatory (inhibitor) subunit 14B                                                 |
| PPP1R15A    | protein phosphatase 1, regulatory subunit 15A                                                             |
| PPP1R15B    | protein phosphatase 1, regulatory subunit 15B                                                             |
| PPP1R16B    | protein phosphatase 1, regulatory subunit 16B                                                             |
| PPP1R2      | protein phosphatase 1, regulatory (inhibitor) subunit 2                                                   |
| PPP1R35     | protein phosphatase 1, regulatory subunit 35                                                              |
| PPP1R37     | protein phosphatase 1, regulatory subunit 37                                                              |
| PPP1R3E     | protein phosphatase 1, regulatory subunit 3E                                                              |
| PPP1R8      | protein phosphatase 1, regulatory subunit 8                                                               |
| PPP1R9B     | protein phosphatase 1, regulatory subunit 9B                                                              |
| PPP2CA      | protein phosphatase 2, catalytic subunit, alpha isozyme                                                   |
| PPP2CB      | protein phosphatase 2, catalytic subunit, beta isozyme                                                    |
| PPP2R1A     | protein phosphatase 2, regulatory subunit A, alpha                                                        |

|           |                                                                         |
|-----------|-------------------------------------------------------------------------|
| PPP2R3C   | protein phosphatase 2, regulatory subunit B'', gamma                    |
| PPP2R4    | protein phosphatase 2A activator, regulatory subunit 4                  |
| PPP2R5A   | protein phosphatase 2, regulatory subunit B', alpha                     |
| PPP2R5E   | protein phosphatase 2, regulatory subunit B', epsilon isoform           |
| PPP3CB    | protein phosphatase 3, catalytic subunit, beta isozyme                  |
| PPP3CC    | protein phosphatase 3, catalytic subunit, gamma isozyme                 |
| PPP3R1    | protein phosphatase 3, regulatory subunit B, alpha                      |
| PPP4C     | protein phosphatase 4, catalytic subunit                                |
| PPP4R2    | protein phosphatase 4, regulatory subunit 2                             |
| PPP6C     | protein phosphatase 6, catalytic subunit                                |
| PPP6R1    | protein phosphatase 6, regulatory subunit 1                             |
| PPP6R3    | protein phosphatase 6, regulatory subunit 3                             |
| PPRC1     | peroxisome proliferator-activated receptor gamma, coactivator-related 1 |
| PPT1      | palmitoyl-protein thioesterase 1                                        |
| PPTC7     | PTC7 protein phosphatase homolog ( <i>S. cerevisiae</i> )               |
| PQBP1     | polyglutamine binding protein 1                                         |
| PRADC1    | protease-associated domain containing 1                                 |
| PRAF2     | PRA1 domain family, member 2                                            |
| PRC1      | protein regulator of cytokinesis 1                                      |
| PRCP      | prolylcarboxypeptidase (angiotensinase C)                               |
| PRDM10    | PR domain containing 10                                                 |
| PRDX1     | peroxiredoxin 1                                                         |
| PRDX2     | peroxiredoxin 2                                                         |
| PRDX3     | peroxiredoxin 3                                                         |
| PRDX5     | peroxiredoxin 5                                                         |
| PRELID1   | PRELI domain containing 1                                               |
| PRH1-PRR4 | PRH1-PRR4 readthrough                                                   |
| PRICKLE4  | prickle homolog 4 ( <i>Drosophila</i> )                                 |
| PRIM1     | primase, DNA, polypeptide 1 (49kDa)                                     |
| PRIM2     | primase, DNA, polypeptide 2 (58kDa)                                     |
| PRIMPOL   | primase and polymerase (DNA-directed)                                   |
| PRKAB1    | protein kinase, AMP-activated, beta 1 non-catalytic subunit             |
| PRKAB2    | protein kinase, AMP-activated, beta 2 non-catalytic subunit             |
| PRKACA    | protein kinase, cAMP-dependent, catalytic, alpha                        |
| PRKAG1    | protein kinase, AMP-activated, gamma 1 non-catalytic subunit            |
| PRKCD     | protein kinase C, delta                                                 |
| PRKCDBP   | protein kinase C, delta binding protein                                 |
| PRKCE     | protein kinase C, epsilon                                               |
| PRKCI     | protein kinase C, iota                                                  |
| PRKCSH    | protein kinase C substrate 80K-H                                        |
| PRKD2     | protein kinase D2                                                       |

|         |                                                                        |
|---------|------------------------------------------------------------------------|
| PRKDC   | protein kinase, DNA-activated, catalytic polypeptide                   |
| PRKRIP1 | PRKR interacting protein 1 (IL11 inducible)                            |
| PRLH    | prolactin releasing hormone                                            |
| PRMT1   | protein arginine methyltransferase 1                                   |
| PRMT2   | protein arginine methyltransferase 2                                   |
| PRMT3   | protein arginine methyltransferase 3                                   |
| PRMT5   | protein arginine methyltransferase 5                                   |
| PRMT7   | protein arginine methyltransferase 7                                   |
| PRMT9   | protein arginine methyltransferase 9                                   |
| PROB1   | proline-rich basic protein 1                                           |
| PROCA1  | protein interacting with cyclin A1                                     |
| PRORS1P | prolyl-tRNA synthetase associated domain containing 1, pseudogene      |
| PROSC   | proline synthetase co-transcribed homolog (bacterial)                  |
| PROSER1 | proline and serine rich 1                                              |
| PROSER3 | proline and serine rich 3                                              |
| PRPF3   | pre-mRNA processing factor 3                                           |
| PRPF31  | pre-mRNA processing factor 31                                          |
| PRPF38A | pre-mRNA processing factor 38A                                         |
| PRPF38B | pre-mRNA processing factor 38B                                         |
| PRPF4   | pre-mRNA processing factor 4                                           |
| PRPF40A | PRP40 pre-mRNA processing factor 40 homolog A ( <i>S. cerevisiae</i> ) |
| PRPF40B | PRP40 pre-mRNA processing factor 40 homolog B ( <i>S. cerevisiae</i> ) |
| PRPF6   | pre-mRNA processing factor 6                                           |
| PRR11   | proline rich 11                                                        |
| PRR14L  | proline rich 14-like                                                   |
| PRR19   | proline rich 19                                                        |
| PRR29   | proline rich 29                                                        |
| PRR7    | proline rich 7 (synaptic)                                              |
| PRRC2C  | proline-rich coiled-coil 2C                                            |
| PRRG2   | proline rich Gla (G-carboxyglutamic acid) 2                            |
| PRRT2   | proline-rich transmembrane protein 2                                   |
| PRRT3   | proline-rich transmembrane protein 3                                   |
| PRSS27  | protease, serine 27                                                    |
| PSD     | pleckstrin and Sec7 domain containing                                  |
| PSD4    | pleckstrin and Sec7 domain containing 4                                |
| PSEN1   | presenilin 1                                                           |
| PSIP1   | PC4 and SFRS1 interacting protein 1                                    |
| PSMA2   | proteasome (prosome, macropain) subunit, alpha type, 2                 |
| PSMA3   | proteasome (prosome, macropain) subunit, alpha type, 3                 |
| PSMA4   | proteasome (prosome, macropain) subunit, alpha type, 4                 |
| PSMA6   | proteasome (prosome, macropain) subunit, alpha type, 6                 |



|         |                                                                      |
|---------|----------------------------------------------------------------------|
| PSMB10  | proteasome (prosome, macropain) subunit, beta type, 10               |
| PSMB2   | proteasome (prosome, macropain) subunit, beta type, 2                |
| PSMB3   | proteasome (prosome, macropain) subunit, beta type, 3                |
| PSMB4   | proteasome (prosome, macropain) subunit, beta type, 4                |
| PSMB7   | proteasome (prosome, macropain) subunit, beta type, 7                |
| PSMB8   | proteasome (prosome, macropain) subunit, beta type, 8                |
| PSMC2   | proteasome (prosome, macropain) 26S subunit, ATPase, 2               |
| PSMC3IP | PSMC3 interacting protein                                            |
| PSMC4   | proteasome (prosome, macropain) 26S subunit, ATPase, 4               |
| PSMC5   | proteasome (prosome, macropain) 26S subunit, ATPase, 5               |
| PSMD1   | proteasome (prosome, macropain) 26S subunit, non-ATPase, 1           |
| PSMD12  | proteasome (prosome, macropain) 26S subunit, non-ATPase, 12          |
| PSMD13  | proteasome (prosome, macropain) 26S subunit, non-ATPase, 13          |
| PSMD14  | proteasome (prosome, macropain) 26S subunit, non-ATPase, 14          |
| PSMD2   | proteasome (prosome, macropain) 26S subunit, non-ATPase, 2           |
| PSMD3   | proteasome (prosome, macropain) 26S subunit, non-ATPase, 3           |
| PSMD4   | proteasome (prosome, macropain) 26S subunit, non-ATPase, 4           |
| PSMD5   | proteasome (prosome, macropain) 26S subunit, non-ATPase, 5           |
| PSMD9   | proteasome (prosome, macropain) 26S subunit, non-ATPase, 9           |
| PSME1   | proteasome (prosome, macropain) activator subunit 1 (PA28 alpha)     |
| PSME2   | proteasome (prosome, macropain) activator subunit 2 (PA28 beta)      |
| PSME3   | proteasome (prosome, macropain) activator subunit 3 (PA28 gamma; Ki) |
| PSMG1   | proteasome (prosome, macropain) assembly chaperone 1                 |
| PSMG3   | proteasome (prosome, macropain) assembly chaperone 3                 |
| PSPH    | phosphoserine phosphatase                                            |
| PTAR1   | protein prenyltransferase alpha subunit repeat containing 1          |
| PTBP1   | polypyrimidine tract binding protein 1                               |
| PTCD2   | pentatricopeptide repeat domain 2                                    |
| PTCD3   | pentatricopeptide repeat domain 3                                    |
| PTDSS1  | phosphatidylserine synthase 1                                        |
| PTDSS2  | phosphatidylserine synthase 2                                        |
| PTEN    | phosphatase and tensin homolog                                       |
| PTGES2  | prostaglandin E synthase 2                                           |
| PTGES3  | prostaglandin E synthase 3 (cytosolic)                               |
| PTGR2   | prostaglandin reductase 2                                            |
| PTK2    | protein tyrosine kinase 2                                            |
| PTK2B   | protein tyrosine kinase 2 beta                                       |
| PTK6    | protein tyrosine kinase 6                                            |
| PTMA    | prothymosin, alpha                                                   |
| PTOV1   | prostate tumor overexpressed 1                                       |
| PTP4A1  | protein tyrosine phosphatase type IVA, member 1                      |

|                |                                                                          |
|----------------|--------------------------------------------------------------------------|
| <b>PTP4A2</b>  | <b>protein tyrosine phosphatase type IVA, member 2</b>                   |
| <b>PTPN1</b>   | <b>protein tyrosine phosphatase, non-receptor type 1</b>                 |
| <b>PTPN11</b>  | <b>protein tyrosine phosphatase, non-receptor type 11</b>                |
| <b>PTPN12</b>  | <b>protein tyrosine phosphatase, non-receptor type 12</b>                |
| <b>PTPN2</b>   | <b>protein tyrosine phosphatase, non-receptor type 2</b>                 |
| <b>PTPN22</b>  | <b>protein tyrosine phosphatase, non-receptor type 22 (lymphoid)</b>     |
| <b>PTPN23</b>  | <b>protein tyrosine phosphatase, non-receptor type 23</b>                |
| <b>PTPN4</b>   | <b>protein tyrosine phosphatase, non-receptor type 4 (megakaryocyte)</b> |
| <b>PTPN6</b>   | <b>protein tyrosine phosphatase, non-receptor type 6</b>                 |
| <b>PTPN7</b>   | <b>protein tyrosine phosphatase, non-receptor type 7</b>                 |
| <b>PTPN9</b>   | <b>protein tyrosine phosphatase, non-receptor type 9</b>                 |
| <b>PTPRC</b>   | <b>protein tyrosine phosphatase, receptor type, C</b>                    |
| <b>PTPRCAP</b> | <b>protein tyrosine phosphatase, receptor type, C-associated protein</b> |
| <b>PTRH2</b>   | <b>peptidyl-tRNA hydrolase 2</b>                                         |
| <b>PTRHD1</b>  | <b>peptidyl-tRNA hydrolase domain containing 1</b>                       |
| <b>PTS</b>     | <b>6-pyruvoyltetrahydropterin synthase</b>                               |
| <b>PUF60</b>   | <b>poly-U binding splicing factor 60KDa</b>                              |
| <b>PURA</b>    | <b>purine-rich element binding protein A</b>                             |
| <b>PURB</b>    | <b>purine-rich element binding protein B</b>                             |
| <b>PUS10</b>   | <b>pseudouridylate synthase 10</b>                                       |
| <b>PUS3</b>    | <b>pseudouridylate synthase 3</b>                                        |
| <b>PUS7L</b>   | <b>pseudouridylate synthase 7 homolog (S. cerevisiae)-like</b>           |
| <b>PUSL1</b>   | <b>pseudouridylate synthase-like 1</b>                                   |
| <b>PVRIG</b>   | <b>poliovirus receptor related immunoglobulin domain containing</b>      |
| <b>PVT1</b>    | <b>Pvt1 oncogene (non-protein coding)</b>                                |
| <b>PWP1</b>    | <b>PWP1 homolog (S. cerevisiae)</b>                                      |
| <b>PWP2</b>    | <b>PWP2 periodic tryptophan protein homolog (yeast)</b>                  |
| <b>PWWP2A</b>  | <b>PWWP domain containing 2A</b>                                         |
| <b>PXK</b>     | <b>PX domain containing serine/threonine kinase</b>                      |
| <b>PXMP2</b>   | <b>peroxisomal membrane protein 2, 22kDa</b>                             |
| <b>PXMP4</b>   | <b>peroxisomal membrane protein 4, 24kDa</b>                             |
| <b>PXT1</b>    | <b>peroxisomal, testis specific 1</b>                                    |
| <b>PYCARD</b>  | <b>PYD and CARD domain containing</b>                                    |
| <b>PYCR2</b>   | <b>pyrroline-5-carboxylate reductase family, member 2</b>                |
| <b>PYCR1</b>   | <b>pyrroline-5-carboxylate reductase-like</b>                            |
| <b>PYGM</b>    | <b>phosphorylase, glycogen, muscle</b>                                   |
| <b>PYGO2</b>   | <b>pygopus family PHD finger 2</b>                                       |
| <b>PYROXD1</b> | <b>pyridine nucleotide-disulphide oxidoreductase domain 1</b>            |
| <b>QKI</b>     | <b>QKI, KH domain containing, RNA binding</b>                            |
| <b>QPCTL</b>   | <b>glutaminy-peptide cyclotransferase-like</b>                           |
| <b>QRICH1</b>  | <b>glutamine-rich 1</b>                                                  |

|             |                                                                                         |
|-------------|-----------------------------------------------------------------------------------------|
| QSER1       | glutamine and serine rich 1                                                             |
| QTRT1       | queuine tRNA-ribosyltransferase 1                                                       |
| R3HCC1      | R3H domain and coiled-coil containing 1                                                 |
| R3HCC1L     | R3H domain and coiled-coil containing 1-like                                            |
| R3HDM1      | R3H domain containing 1                                                                 |
| RAB10       | RAB10, member RAS oncogene family                                                       |
| RAB11A      | RAB11A, member RAS oncogene family                                                      |
| RAB11FIP1   | RAB11 family interacting protein 1 (class I)                                            |
| RAB12       | RAB12, member RAS oncogene family                                                       |
| RAB13       | RAB13, member RAS oncogene family                                                       |
| RAB14       | RAB14, member RAS oncogene family                                                       |
| RAB18       | RAB18, member RAS oncogene family                                                       |
| RAB1B       | RAB1B, member RAS oncogene family                                                       |
| RAB21       | RAB21, member RAS oncogene family                                                       |
| RAB24       | RAB24, member RAS oncogene family                                                       |
| RAB27A      | RAB27A, member RAS oncogene family                                                      |
| RAB30       | RAB30, member RAS oncogene family                                                       |
| RAB33B      | RAB33B, member RAS oncogene family                                                      |
| RAB34       | RAB34, member RAS oncogene family                                                       |
| RAB35       | RAB35, member RAS oncogene family                                                       |
| RAB3GAP1    | RAB3 GTPase activating protein subunit 1 (catalytic)                                    |
| RAB3GAP2    | RAB3 GTPase activating protein subunit 2 (non-catalytic)                                |
| RAB40C      | RAB40C, member RAS oncogene family                                                      |
| RAB43       | RAB43, member RAS oncogene family                                                       |
| RAB4B       | RAB4B, member RAS oncogene family                                                       |
| RAB4B-EGLN2 | RAB4B-EGLN2 readthrough (NMD candidate)                                                 |
| RAB5A       | RAB5A, member RAS oncogene family                                                       |
| RAB5B       | RAB5B, member RAS oncogene family                                                       |
| RAB8A       | RAB8A, member RAS oncogene family                                                       |
| RABEP2      | rabaptin, RAB GTPase binding effector protein 2                                         |
| RABEPK      | Rab9 effector protein with kelch motifs                                                 |
| RABGAP1     | RAB GTPase activating protein 1                                                         |
| RABGAP1L    | RAB GTPase activating protein 1-like                                                    |
| RABGEF1     | RAB guanine nucleotide exchange factor (GEF) 1                                          |
| RABGGTA     | Rab geranylgeranyltransferase, alpha subunit                                            |
| RABGGTB     | Rab geranylgeranyltransferase, beta subunit                                             |
| RABIF       | RAB interacting factor                                                                  |
| RABL3       | RAB, member of RAS oncogene family-like 3                                               |
| RAC2        | ras-related C3 botulinum toxin substrate 2 (rho family, small GTP binding protein Rac2) |
| RAD1        | RAD1 checkpoint DNA exonuclease                                                         |
| RAD17       | RAD17 homolog ( <i>S. pombe</i> )                                                       |

|                    |                                                                     |
|--------------------|---------------------------------------------------------------------|
| <b>RAD18</b>       | <b>RAD18 E3 ubiquitin protein ligase</b>                            |
| <b>RAD23A</b>      | <b>RAD23 homolog A (<i>S. cerevisiae</i>)</b>                       |
| <b>RAD23B</b>      | <b>RAD23 homolog B (<i>S. cerevisiae</i>)</b>                       |
| <b>RAD50</b>       | <b>RAD50 homolog (<i>S. cerevisiae</i>)</b>                         |
| <b>RAD51</b>       | <b>RAD51 recombinase</b>                                            |
| <b>RAD51AP1</b>    | <b>RAD51 associated protein 1</b>                                   |
| <b>RAD51C</b>      | <b>RAD51 paralog C</b>                                              |
| <b>RAD52</b>       | <b>RAD52 homolog (<i>S. cerevisiae</i>)</b>                         |
| <b>RAD9A</b>       | <b>RAD9 homolog A (<i>S. pombe</i>)</b>                             |
| <b>RAD9B</b>       | <b>RAD9 homolog B (<i>S. pombe</i>)</b>                             |
| <b>RAF1</b>        | <b>Raf-1 proto-oncogene, serine/threonine kinase</b>                |
| <b>RALA</b>        | <b>v-ral simian leukemia viral oncogene homolog A (ras related)</b> |
| <b>RALBP1</b>      | <b>ralA binding protein 1</b>                                       |
| <b>RALGDS</b>      | <b>ral guanine nucleotide dissociation stimulator</b>               |
| <b>RALY</b>        | <b>RALY heterogeneous nuclear ribonucleoprotein</b>                 |
| <b>RAN</b>         | <b>RAN, member RAS oncogene family</b>                              |
| <b>RANBP1</b>      | <b>RAN binding protein 1</b>                                        |
| <b>RANBP2</b>      | <b>RAN binding protein 2</b>                                        |
| <b>RANBP3</b>      | <b>RAN binding protein 3</b>                                        |
| <b>RANBP6</b>      | <b>RAN binding protein 6</b>                                        |
| <b>RANBP9</b>      | <b>RAN binding protein 9</b>                                        |
| <b>RANGAP1</b>     | <b>Ran GTPase activating protein 1</b>                              |
| <b>RANGRF</b>      | <b>RAN guanine nucleotide release factor</b>                        |
| <b>RAP1A</b>       | <b>RAP1A, member of RAS oncogene family</b>                         |
| <b>RAP2A</b>       | <b>RAP2A, member of RAS oncogene family</b>                         |
| <b>RAP2B</b>       | <b>RAP2B, member of RAS oncogene family</b>                         |
| <b>RAPGEF6</b>     | <b>Rap guanine nucleotide exchange factor (GEF) 6</b>               |
| <b>RARA</b>        | <b>retinoic acid receptor, alpha</b>                                |
| <b>RARS</b>        | <b>arginyl-tRNA synthetase</b>                                      |
| <b>RARS2</b>       | <b>arginyl-tRNA synthetase 2, mitochondrial</b>                     |
| <b>RASA1</b>       | <b>RAS p21 protein activator (GTPase activating protein) 1</b>      |
| <b>RASA3</b>       | <b>RAS p21 protein activator 3</b>                                  |
| <b>RASAL3</b>      | <b>RAS protein activator like 3</b>                                 |
| <b>RASGRF2</b>     | <b>Ras protein-specific guanine nucleotide-releasing factor 2</b>   |
| <b>RASGRP1</b>     | <b>RAS guanyl releasing protein 1 (calcium and DAG-regulated)</b>   |
| <b>RASSF2</b>      | <b>Ras association (RalGDS/AF-6) domain family member 2</b>         |
| <b>RASSF5</b>      | <b>Ras association (RalGDS/AF-6) domain family member 5</b>         |
| <b>RAVER1</b>      | <b>ribonucleoprotein, PTB-binding 1</b>                             |
| <b>RB1</b>         | <b>retinoblastoma 1</b>                                             |
| <b>RBAK</b>        | <b>RB-associated KRAB zinc finger</b>                               |
| <b>RBAK-RBAKDN</b> | <b>RBAK-RBAKDN readthrough</b>                                      |

|            |                                                                        |
|------------|------------------------------------------------------------------------|
| RBBP4      | retinoblastoma binding protein 4                                       |
| RBBP5      | retinoblastoma binding protein 5                                       |
| RBBP6      | retinoblastoma binding protein 6                                       |
| RBFA       | ribosome binding factor A (putative)                                   |
| RBKS       | ribokinase                                                             |
| RBL1       | retinoblastoma-like 1                                                  |
| RBM12      | RNA binding motif protein 12                                           |
| RBM12B     | RNA binding motif protein 12B                                          |
| RBM12B-AS1 | RBM12B antisense RNA 1                                                 |
| RBM14      | RNA binding motif protein 14                                           |
| RBM14-RBM4 | RBM14-RBM4 readthrough                                                 |
| RBM15      | RNA binding motif protein 15                                           |
| RBM15B     | RNA binding motif protein 15B                                          |
| RBM17      | RNA binding motif protein 17                                           |
| RBM18      | RNA binding motif protein 18                                           |
| RBM22      | RNA binding motif protein 22                                           |
| RBM23      | RNA binding motif protein 23                                           |
| RBM25      | RNA binding motif protein 25                                           |
| RBM26      | RNA binding motif protein 26                                           |
| RBM26-AS1  | RBM26 antisense RNA 1                                                  |
| RBM27      | RNA binding motif protein 27                                           |
| RBM28      | RNA binding motif protein 28                                           |
| RBM3       | RNA binding motif (RNP1, RRM) protein 3                                |
| RBM34      | RNA binding motif protein 34                                           |
| RBM38      | RNA binding motif protein 38                                           |
| RBM39      | RNA binding motif protein 39                                           |
| RBM4       | RNA binding motif protein 4                                            |
| RBM42      | RNA binding motif protein 42                                           |
| RBM43      | RNA binding motif protein 43                                           |
| RBM45      | RNA binding motif protein 45                                           |
| RBM47      | RNA binding motif protein 47                                           |
| RBM4B      | RNA binding motif protein 4B                                           |
| RBM5       | RNA binding motif protein 5                                            |
| RBM6       | RNA binding motif protein 6                                            |
| RBM7       | RNA binding motif protein 7                                            |
| RBMX       | RNA binding motif protein, X-linked                                    |
| RBMXL1     | RNA binding motif protein, X-linked-like 1                             |
| RBP5       | retinol binding protein 5, cellular                                    |
| RBPJ       | recombination signal binding protein for immunoglobulin kappa J region |
| RBSN       | rabenosyn, RAB effector                                                |
| RBX1       | ring-box 1, E3 ubiquitin protein ligase                                |

|        |                                                                                  |
|--------|----------------------------------------------------------------------------------|
| RC3H2  | ring finger and CCCH-type domains 2                                              |
| RCC1   | regulator of chromosome condensation 1                                           |
| RCC2   | regulator of chromosome condensation 2                                           |
| RCCD1  | RCC1 domain containing 1                                                         |
| RCE1   | Ras converting CAAX endopeptidase 1                                              |
| RCHY1  | ring finger and CHY zinc finger domain containing 1, E3 ubiquitin protein ligase |
| RCOR1  | REST corepressor 1                                                               |
| RCOR3  | REST corepressor 3                                                               |
| RCSD1  | RCSD domain containing 1                                                         |
| RDH10  | retinol dehydrogenase 10 (all-trans)                                             |
| RDH11  | retinol dehydrogenase 11 (all-trans/9-cis/11-cis)                                |
| RDX    | radixin                                                                          |
| REC8   | REC8 meiotic recombination protein                                               |
| RECQL  | RecQ helicase-like                                                               |
| RECQL5 | RecQ protein-like 5                                                              |
| REEP2  | receptor accessory protein 2                                                     |
| REL    | v-rel avian reticuloendotheliosis viral oncogene homolog                         |
| RELA   | v-rel avian reticuloendotheliosis viral oncogene homolog A                       |
| RELB   | v-rel avian reticuloendotheliosis viral oncogene homolog B                       |
| RELT   | RELT tumor necrosis factor receptor                                              |
| REPIN1 | replication initiator 1                                                          |
| RETSAT | retinol saturase (all-trans-retinol 13,14-reductase)                             |
| REV1   | REV1, polymerase (DNA directed)                                                  |
| REV3L  | REV3-like, polymerase (DNA directed), zeta, catalytic subunit                    |
| REXO1  | REX1, RNA exonuclease 1 homolog ( <i>S. cerevisiae</i> )                         |
| REXO4  | REX4, RNA exonuclease 4 homolog ( <i>S. cerevisiae</i> )                         |
| RFC1   | replication factor C (activator 1) 1, 145kDa                                     |
| RFC2   | replication factor C (activator 1) 2, 40kDa                                      |
| RFC3   | replication factor C (activator 1) 3, 38kDa                                      |
| RFC4   | replication factor C (activator 1) 4, 37kDa                                      |
| RFFL   | ring finger and FYVE-like domain containing E3 ubiquitin protein ligase          |
| RFK    | riboflavin kinase                                                                |
| RFT1   | RFT1 homolog ( <i>S. cerevisiae</i> )                                            |
| RFTN1  | raftlin, lipid raft linker 1                                                     |
| RFWD2  | ring finger and WD repeat domain 2, E3 ubiquitin protein ligase                  |
| RFWD3  | ring finger and WD repeat domain 3                                               |
| RFX1   | regulatory factor X, 1 (influences HLA class II expression)                      |
| RFX3   | regulatory factor X, 3 (influences HLA class II expression)                      |
| RFX5   | regulatory factor X, 5 (influences HLA class II expression)                      |
| RFXANK | regulatory factor X-associated ankyrin-containing protein                        |
| RGL1   | ral guanine nucleotide dissociation stimulator-like 1                            |

|        |                                                                                  |
|--------|----------------------------------------------------------------------------------|
| RGL2   | ral guanine nucleotide dissociation stimulator-like 2                            |
| RGS1   | regulator of G-protein signaling 1                                               |
| RGS10  | regulator of G-protein signaling 10                                              |
| RGS14  | regulator of G-protein signaling 14                                              |
| RGS16  | regulator of G-protein signaling 16                                              |
| RGS5   | regulator of G-protein signaling 5                                               |
| RGS6   | regulator of G-protein signaling 6                                               |
| RHBDD1 | rhomboid domain containing 1                                                     |
| RHBDD3 | rhomboid domain containing 3                                                     |
| RHBDL1 | rhomboid, veinlet-like 1 (Drosophila)                                            |
| RHEBL1 | Ras homolog enriched in brain like 1                                             |
| RHOA   | ras homolog family member A                                                      |
| RHOC   | ras homolog family member C                                                      |
| RHOF   | ras homolog family member F (in filopodia)                                       |
| RHOG   | ras homolog family member G                                                      |
| RHOH   | ras homolog family member H                                                      |
| RHOQ   | ras homolog family member Q                                                      |
| RHOT2  | ras homolog family member T2                                                     |
| RHOV   | ras homolog family member V                                                      |
| RIBC1  | RIB43A domain with coiled-coils 1                                                |
| RIC1   | RAB6A GEF complex partner 1                                                      |
| RIC8A  | RIC8 guanine nucleotide exchange factor A                                        |
| RIF1   | replication timing regulatory factor 1                                           |
| RILP   | Rab interacting lysosomal protein                                                |
| RILPL2 | Rab interacting lysosomal protein-like 2                                         |
| RIN1   | Ras and Rab interactor 1                                                         |
| RINL   | Ras and Rab interactor-like                                                      |
| RINT1  | RAD50 interactor 1                                                               |
| RIOK1  | RIO kinase 1                                                                     |
| RIOK2  | RIO kinase 2                                                                     |
| RIOK3  | RIO kinase 3                                                                     |
| RIPK2  | receptor-interacting serine-threonine kinase 2                                   |
| RIT1   | Ras-like without CAAX 1                                                          |
| RITA1  | RBPJ interacting and tubulin associated 1                                        |
| RLF    | rearranged L-myc fusion                                                          |
| RLIM   | ring finger protein, LIM domain interacting                                      |
| RLTPR  | RGD motif, leucine rich repeats, tropomodulin domain and proline-rich containing |
| RMDN1  | regulator of microtubule dynamics 1                                              |
| RMDN3  | regulator of microtubule dynamics 3                                              |
| RMI1   | RecQ mediated genome instability 1                                               |
| RMI2   | RecQ mediated genome instability 2                                               |

|                 |                                                                            |
|-----------------|----------------------------------------------------------------------------|
| RMND1           | required for meiotic nuclear division 1 homolog ( <i>S. cerevisiae</i> )   |
| RMND5B          | required for meiotic nuclear division 5 homolog B ( <i>S. cerevisiae</i> ) |
| RMRP            | RNA component of mitochondrial RNA processing endoribonuclease             |
| RNASE4          | ribonuclease, RNase A family, 4                                            |
| RNASE6          | ribonuclease, RNase A family, k6                                           |
| RNASEH1         | ribonuclease H1                                                            |
| RNASEH2C        | ribonuclease H2, subunit C                                                 |
| RNASEK          | ribonuclease, RNase K                                                      |
| RNASEK-C17ORF49 | RNASEK-C17orf49 readthrough                                                |
| RNASET2         | ribonuclease T2                                                            |
| RND1            | Rho family GTPase 1                                                        |
| RNF115          | ring finger protein 115                                                    |
| RNF121          | ring finger protein 121                                                    |
| RNF123          | ring finger protein 123                                                    |
| RNF126          | ring finger protein 126                                                    |
| RNF13           | ring finger protein 13                                                     |
| RNF135          | ring finger protein 135                                                    |
| RNF138          | ring finger protein 138, E3 ubiquitin protein ligase                       |
| RNF139          | ring finger protein 139                                                    |
| RNF141          | ring finger protein 141                                                    |
| RNF146          | ring finger protein 146                                                    |
| RNF149          | ring finger protein 149                                                    |
| RNF151          | ring finger protein 151                                                    |
| RNF167          | ring finger protein 167                                                    |
| RNF168          | ring finger protein 168, E3 ubiquitin protein ligase                       |
| RNF181          | ring finger protein 181                                                    |
| RNF187          | ring finger protein 187                                                    |
| RNF19A          | ring finger protein 19A, RBR E3 ubiquitin protein ligase                   |
| RNF19B          | ring finger protein 19B                                                    |
| RNF213          | ring finger protein 213                                                    |
| RNF216          | ring finger protein 216                                                    |
| RNF25           | ring finger protein 25                                                     |
| RNF31           | ring finger protein 31                                                     |
| RNF32           | ring finger protein 32                                                     |
| RNF34           | ring finger protein 34, E3 ubiquitin protein ligase                        |
| RNF38           | ring finger protein 38                                                     |
| RNF4            | ring finger protein 4                                                      |
| RNF41           | ring finger protein 41, E3 ubiquitin protein ligase                        |
| RNF43           | ring finger protein 43                                                     |
| RNF44           | ring finger protein 44                                                     |
| RNF7            | ring finger protein 7                                                      |



|                |                                                      |
|----------------|------------------------------------------------------|
| RNFT1          | ring finger protein, transmembrane 1                 |
| RNGTT          | RNA guanylyltransferase and 5'-phosphatase           |
| RNH1           | ribonuclease/angiogenin inhibitor 1                  |
| RNLS           | renalase, FAD-dependent amine oxidase                |
| RNMT           | RNA (guanine-7-) methyltransferase                   |
| RNMTL1         | RNA methyltransferase like 1                         |
| RNPC3          | RNA-binding region (RNP1, RRM) containing 3          |
| RNPS1          | RNA binding protein S1, serine-rich domain           |
| RNU11          | RNA, U11 small nuclear                               |
| RNU12          | RNA, U12 small nuclear                               |
| RNU4ATAC       | RNA, U4atac small nuclear (U12-dependent splicing)   |
| RNU86          | RNA, U86 small nucleolar                             |
| ROGDI          | rogdi homolog (Drosophila)                           |
| ROMO1          | reactive oxygen species modulator 1                  |
| ROPN1L         | rhopilin associated tail protein 1-like              |
| RPA1           | replication protein A1, 70kDa                        |
| RPA2           | replication protein A2, 32kDa                        |
| RPAP1          | RNA polymerase II associated protein 1               |
| RPAP3          | RNA polymerase II associated protein 3               |
| RPF1           | ribosome production factor 1 homolog (S. cerevisiae) |
| RPF2           | ribosome production factor 2 homolog (S. cerevisiae) |
| RPIA           | ribose 5-phosphate isomerase A                       |
| RPL10          | ribosomal protein L10                                |
| RPL10A         | ribosomal protein L10a                               |
| RPL11          | ribosomal protein L11                                |
| RPL12          | ribosomal protein L12                                |
| RPL13          | ribosomal protein L13                                |
| RPL13A         | ribosomal protein L13a                               |
| RPL13AP5       | ribosomal protein L13a pseudogene 5                  |
| RPL14          | ribosomal protein L14                                |
| RPL15          | ribosomal protein L15                                |
| RPL17          | ribosomal protein L17                                |
| RPL17-C18ORF32 | RPL17-C18orf32 readthrough                           |
| RPL18          | ribosomal protein L18                                |
| RPL18A         | ribosomal protein L18a                               |
| RPL19          | ribosomal protein L19                                |
| RPL21          | ribosomal protein L21                                |
| RPL21P28       | ribosomal protein L21 pseudogene 28                  |
| RPL22          | ribosomal protein L22                                |
| RPL22L1        | ribosomal protein L22-like 1                         |
| RPL23          | ribosomal protein L23                                |

|                |                                       |
|----------------|---------------------------------------|
| RPL23A         | ribosomal protein L23a                |
| RPL24          | ribosomal protein L24                 |
| RPL26          | ribosomal protein L26                 |
| RPL26L1        | ribosomal protein L26-like 1          |
| RPL27          | ribosomal protein L27                 |
| RPL27A         | ribosomal protein L27a                |
| RPL28          | ribosomal protein L28                 |
| RPL29          | ribosomal protein L29                 |
| RPL3           | ribosomal protein L3                  |
| RPL31          | ribosomal protein L31                 |
| RPL32          | ribosomal protein L32                 |
| RPL32P3        | ribosomal protein L32 pseudogene 3    |
| RPL34          | ribosomal protein L34                 |
| RPL35          | ribosomal protein L35                 |
| RPL35A         | ribosomal protein L35a                |
| RPL36          | ribosomal protein L36                 |
| RPL36A         | ribosomal protein L36a                |
| RPL36A-HNRNPH2 | RPL36A-HNRNPH2 readthrough            |
| RPL36AL        | ribosomal protein L36a-like           |
| RPL37          | ribosomal protein L37                 |
| RPL37A         | ribosomal protein L37a                |
| RPL38          | ribosomal protein L38                 |
| RPL39          | ribosomal protein L39                 |
| RPL4           | ribosomal protein L4                  |
| RPL41          | ribosomal protein L41                 |
| RPL5           | ribosomal protein L5                  |
| RPL6           | ribosomal protein L6                  |
| RPL7           | ribosomal protein L7                  |
| RPL7A          | ribosomal protein L7a                 |
| RPL7L1         | ribosomal protein L7-like 1           |
| RPL8           | ribosomal protein L8                  |
| RPL9           | ribosomal protein L9                  |
| RPLP0          | ribosomal protein, large, P0          |
| RPLP1          | ribosomal protein, large, P1          |
| RPLP2          | ribosomal protein, large, P2          |
| RPN1           | ribophorin I                          |
| RPN2           | ribophorin II                         |
| RPP14          | ribonuclease P/MRP 14kDa subunit      |
| RPP25L         | ribonuclease P/MRP 25kDa subunit-like |
| RPP38          | ribonuclease P/MRP 38kDa subunit      |
| RPP40          | ribonuclease P/MRP 40kDa subunit      |

|             |                                                     |
|-------------|-----------------------------------------------------|
| RPPH1       | ribonuclease P RNA component H1                     |
| RPRD1A      | regulation of nuclear pre-mRNA domain containing 1A |
| RPRD1B      | regulation of nuclear pre-mRNA domain containing 1B |
| RPRD2       | regulation of nuclear pre-mRNA domain containing 2  |
| RPS10       | ribosomal protein S10                               |
| RPS10-NUDT3 | RPS10-NUDT3 readthrough                             |
| RPS11       | ribosomal protein S11                               |
| RPS12       | ribosomal protein S12                               |
| RPS13       | ribosomal protein S13                               |
| RPS14       | ribosomal protein S14                               |
| RPS15       | ribosomal protein S15                               |
| RPS15A      | ribosomal protein S15a                              |
| RPS16       | ribosomal protein S16                               |
| RPS19       | ribosomal protein S19                               |
| RPS19BP1    | ribosomal protein S19 binding protein 1             |
| RPS2        | ribosomal protein S2                                |
| RPS20       | ribosomal protein S20                               |
| RPS21       | ribosomal protein S21                               |
| RPS23       | ribosomal protein S23                               |
| RPS24       | ribosomal protein S24                               |
| RPS25       | ribosomal protein S25                               |
| RPS26       | ribosomal protein S26                               |
| RPS27       | ribosomal protein S27                               |
| RPS27A      | ribosomal protein S27a                              |
| RPS27L      | ribosomal protein S27-like                          |
| RPS28       | ribosomal protein S28                               |
| RPS29       | ribosomal protein S29                               |
| RPS2P32     | ribosomal protein S2 pseudogene 32                  |
| RPS3        | ribosomal protein S3                                |
| RPS3A       | ribosomal protein S3A                               |
| RPS4X       | ribosomal protein S4, X-linked                      |
| RPS5        | ribosomal protein S5                                |
| RPS6        | ribosomal protein S6                                |
| RPS6KA3     | ribosomal protein S6 kinase, 90kDa, polypeptide 3   |
| RPS6KB1     | ribosomal protein S6 kinase, 70kDa, polypeptide 1   |
| RPS6KB2     | ribosomal protein S6 kinase, 70kDa, polypeptide 2   |
| RPS7        | ribosomal protein S7                                |
| RPS8        | ribosomal protein S8                                |
| RPS9        | ribosomal protein S9                                |
| RPSA        | ribosomal protein SA                                |
| RPTOR       | regulatory associated protein of MTOR, complex 1    |

|                |                                                                                       |
|----------------|---------------------------------------------------------------------------------------|
| RPUSD2         | RNA pseudouridylate synthase domain containing 2                                      |
| RPUSD4         | RNA pseudouridylate synthase domain containing 4                                      |
| RQCD1          | RCD1 required for cell differentiation1 homolog ( <i>S. pombe</i> )                   |
| RRAGA          | Ras-related GTP binding A                                                             |
| RRAS           | related RAS viral (r-ras) oncogene homolog                                            |
| RREB1          | ras responsive element binding protein 1                                              |
| RRM1           | ribonucleotide reductase M1                                                           |
| RRM2           | ribonucleotide reductase M2                                                           |
| RRM2B          | ribonucleotide reductase M2 B (TP53 inducible)                                        |
| RRNAD1         | ribosomal RNA adenine dimethylase domain containing 1                                 |
| RRP1           | ribosomal RNA processing 1                                                            |
| RRP15          | ribosomal RNA processing 15 homolog ( <i>S. cerevisiae</i> )                          |
| RRP1B          | ribosomal RNA processing 1B                                                           |
| RRP36          | ribosomal RNA processing 36 homolog ( <i>S. cerevisiae</i> )                          |
| RRP7BP         | ribosomal RNA processing 7 homolog B ( <i>S. cerevisiae</i> ), pseudogene             |
| RRP8           | ribosomal RNA processing 8, methyltransferase, homolog (yeast)                        |
| RRP9           | ribosomal RNA processing 9, small subunit (SSU) processome component, homolog (yeast) |
| RRS1           | RRS1 ribosome biogenesis regulator homolog ( <i>S. cerevisiae</i> )                   |
| RSAD1          | radical S-adenosyl methionine domain containing 1                                     |
| RSBN1          | round spermatid basic protein 1                                                       |
| RSF1           | remodeling and spacing factor 1                                                       |
| RSL1D1         | ribosomal L1 domain containing 1                                                      |
| RSL24D1        | ribosomal L24 domain containing 1                                                     |
| RSPH3          | radial spoke 3 homolog ( <i>Chlamydomonas</i> )                                       |
| RSPH6A         | radial spoke head 6 homolog A ( <i>Chlamydomonas</i> )                                |
| RSRC1          | arginine/serine-rich coiled-coil 1                                                    |
| RSRC2          | arginine/serine-rich coiled-coil 2                                                    |
| RSRP1          | arginine/serine-rich protein 1                                                        |
| RTEL1          | regulator of telomere elongation helicase 1                                           |
| RTEL1-TNFRSF6B | RTEL1-TNFRSF6B readthrough (NMD candidate)                                            |
| RTFDC1         | replication termination factor 2 domain containing 1                                  |
| RTN4           | reticulon 4                                                                           |
| RTTN           | rotatin                                                                               |
| RUFY1          | RUN and FYVE domain containing 1                                                      |
| RUNX1          | runt-related transcription factor 1                                                   |
| RUNX3          | runt-related transcription factor 3                                                   |
| RUSC1          | RUN and SH3 domain containing 1                                                       |
| RUSC1-AS1      | RUSC1 antisense RNA 1                                                                 |
| RUVBL1         | RuvB-like AAA ATPase 1                                                                |
| RUVBL2         | RuvB-like AAA ATPase 2                                                                |
| RWDD1          | RWD domain containing 1                                                               |

|         |                                                         |
|---------|---------------------------------------------------------|
| RWDD3   | RWD domain containing 3                                 |
| RXFP4   | relaxin/insulin-like family peptide receptor 4          |
| S100A13 | S100 calcium binding protein A13                        |
| S100PBP | S100P binding protein                                   |
| S1PR1   | sphingosine-1-phosphate receptor 1                      |
| S1PR2   | sphingosine-1-phosphate receptor 2                      |
| S1PR4   | sphingosine-1-phosphate receptor 4                      |
| SAC3D1  | SAC3 domain containing 1                                |
| SACM1L  | SAC1 suppressor of actin mutations 1-like (yeast)       |
| SAE1    | SUMO1 activating enzyme subunit 1                       |
| SAFB    | scaffold attachment factor B                            |
| SAFB2   | scaffold attachment factor B2                           |
| SAMD1   | sterile alpha motif domain containing 1                 |
| SAMD10  | sterile alpha motif domain containing 10                |
| SAMD4B  | sterile alpha motif domain containing 4B                |
| SAMHD1  | SAM domain and HD domain 1                              |
| SAP18   | Sin3A-associated protein, 18kDa                         |
| SAP30   | Sin3A-associated protein, 30kDa                         |
| SAP30BP | SAP30 binding protein                                   |
| SAP30L  | SAP30-like                                              |
| SAR1A   | secretion associated, Ras related GTPase 1A             |
| SAR1B   | secretion associated, Ras related GTPase 1B             |
| SARM1   | sterile alpha and TIR motif containing 1                |
| SARNP   | SAP domain containing ribonucleoprotein                 |
| SARS    | seryl-tRNA synthetase                                   |
| SARS2   | seryl-tRNA synthetase 2, mitochondrial                  |
| SART1   | squamous cell carcinoma antigen recognized by T cells   |
| SART3   | squamous cell carcinoma antigen recognized by T cells 3 |
| SASH3   | SAM and SH3 domain containing 3                         |
| SAT1    | spermidine/spermine N1-acetyltransferase 1              |
| SAV1    | salvador family WW domain containing protein 1          |
| SBDS    | Shwachman-Bodian-Diamond syndrome                       |
| SCAF1   | SR-related CTD-associated factor 1                      |
| SCAF11  | SR-related CTD-associated factor 11                     |
| SCAF8   | SR-related CTD-associated factor 8                      |
| SCAI    | suppressor of cancer cell invasion                      |
| SCAMP1  | secretory carrier membrane protein 1                    |
| SCAMP3  | secretory carrier membrane protein 3                    |
| SCAMP4  | secretory carrier membrane protein 4                    |
| SCAND1  | SCAN domain containing 1                                |
| SCARB1  | scavenger receptor class B, member 1                    |

|          |                                                                                        |
|----------|----------------------------------------------------------------------------------------|
| SCARF1   | scavenger receptor class F, member 1                                                   |
| SCARNA16 | small Cajal body-specific RNA 16                                                       |
| SCARNA2  | small Cajal body-specific RNA 2                                                        |
| SCFD1    | sec1 family domain containing 1                                                        |
| SCFD2    | sec1 family domain containing 2                                                        |
| SCIMP    | SLP adaptor and CSK interacting membrane protein                                       |
| SCN4A    | sodium channel, voltage gated, type IV alpha subunit                                   |
| SCN5A    | sodium channel, voltage gated, type V alpha subunit                                    |
| SCNM1    | sodium channel modifier 1                                                              |
| SCO2     | SCO2 cytochrome c oxidase assembly protein                                             |
| SCRIB    | scribbled planar cell polarity protein                                                 |
| SCRN2    | secernin 2                                                                             |
| SCYL3    | SCY1-like 3 ( <i>S. cerevisiae</i> )                                                   |
| SDAD1    | SDA1 domain containing 1                                                               |
| SDC1     | syndecan 1                                                                             |
| SDCBP    | syndecan binding protein (syntenin)                                                    |
| SDCCAG3  | serologically defined colon cancer antigen 3                                           |
| SDCCAG8  | serologically defined colon cancer antigen 8                                           |
| SDE2     | SDE2 telomere maintenance homolog ( <i>S. pombe</i> )                                  |
| SDF2     | stromal cell-derived factor 2                                                          |
| SDF4     | stromal cell derived factor 4                                                          |
| SDHAF2   | succinate dehydrogenase complex assembly factor 2                                      |
| SDHAF3   | succinate dehydrogenase complex assembly factor 3                                      |
| SDHAP3   | succinate dehydrogenase complex, subunit A, flavoprotein pseudogene 3                  |
| SDHD     | succinate dehydrogenase complex, subunit D, integral membrane protein                  |
| SDR39U1  | short chain dehydrogenase/reductase family 39U, member 1                               |
| SEC11A   | SEC11 homolog A ( <i>S. cerevisiae</i> )                                               |
| SEC11C   | SEC11 homolog C ( <i>S. cerevisiae</i> )                                               |
| SEC13    | SEC13 homolog ( <i>S. cerevisiae</i> )                                                 |
| SEC14L1  | SEC14-like 1 ( <i>S. cerevisiae</i> )                                                  |
| SEC14L5  | SEC14-like 5 ( <i>S. cerevisiae</i> )                                                  |
| SEC16A   | SEC16 homolog A ( <i>S. cerevisiae</i> )                                               |
| SEC1P    | secretory blood group 1, pseudogene                                                    |
| SEC22A   | SEC22 vesicle trafficking protein homolog A ( <i>S. cerevisiae</i> )                   |
| SEC22B   | SEC22 vesicle trafficking protein homolog B ( <i>S. cerevisiae</i> ) (gene/pseudogene) |
| SEC22C   | SEC22 vesicle trafficking protein homolog C ( <i>S. cerevisiae</i> )                   |
| SEC23B   | Sec23 homolog B ( <i>S. cerevisiae</i> )                                               |
| SEC23IP  | SEC23 interacting protein                                                              |
| SEC24A   | SEC24 family member A                                                                  |
| SEC24C   | SEC24 family member C                                                                  |
| SEC31A   | SEC31 homolog A ( <i>S. cerevisiae</i> )                                               |

|                |                                                                                                                  |
|----------------|------------------------------------------------------------------------------------------------------------------|
| SEC61A1        | Sec61 alpha 1 subunit ( <i>S. cerevisiae</i> )                                                                   |
| SEC61A2        | Sec61 alpha 2 subunit ( <i>S. cerevisiae</i> )                                                                   |
| SEC61B         | Sec61 beta subunit                                                                                               |
| SEC61G         | Sec61 gamma subunit                                                                                              |
| SEC62          | SEC62 homolog ( <i>S. cerevisiae</i> )                                                                           |
| SECISBP2       | SECIS binding protein 2                                                                                          |
| SECISBP2L      | SECIS binding protein 2-like                                                                                     |
| SEH1L          | SEH1-like ( <i>S. cerevisiae</i> )                                                                               |
| SELK           | selenoprotein K                                                                                                  |
| SELO           | selenoprotein O                                                                                                  |
| SELPLG         | selectin P ligand                                                                                                |
| SELT           | selenoprotein T                                                                                                  |
| SEMA3B         | sema domain, immunoglobulin domain (Ig), short basic domain, secreted, (semaphorin) 3B                           |
| SEMA4C         | sema domain, immunoglobulin domain (Ig), transmembrane domain (TM) and short cytoplasmic domain, (semaphorin) 4C |
| SEMA6A         | sema domain, transmembrane domain (TM), and cytoplasmic domain, (semaphorin) 6A                                  |
| SEMA7A         | semaphorin 7A, GPI membrane anchor (John Milton Hagen blood group)                                               |
| SEN1           | SUMO1/sentrin specific peptidase 1                                                                               |
| SEN2           | SUMO1/sentrin/SMT3 specific peptidase 2                                                                          |
| SEN3           | SUMO1/sentrin/SMT3 specific peptidase 3                                                                          |
| SEN3-EIF4A1    | SEN3-EIF4A1 readthrough (NMD candidate)                                                                          |
| SEN5           | SUMO1/sentrin specific peptidase 5                                                                               |
| SEN6           | SUMO1/sentrin specific peptidase 6                                                                               |
| Sep-15         | 15 kDa selenoprotein                                                                                             |
| SEPHS2         | selenophosphate synthetase 2                                                                                     |
| SEPSECS        | Sep (O-phosphoserine) tRNA:Sec (selenocysteine) tRNA synthase                                                    |
| Sep-01         | septin 1                                                                                                         |
| Sep-11         | septin 11                                                                                                        |
| Sep-02         | septin 2                                                                                                         |
| Sep-07         | septin 7                                                                                                         |
| SEPT7P2        | septin 7 pseudogene 2                                                                                            |
| Sep-09         | septin 9                                                                                                         |
| SERBP1         | SERPINE1 mRNA binding protein 1                                                                                  |
| SERF2          | small EDRK-rich factor 2                                                                                         |
| SERF2-C15ORF63 | SERF2-C15orf63 readthrough                                                                                       |
| SERGEF         | secretion regulating guanine nucleotide exchange factor                                                          |
| SERHL2         | serine hydrolase-like 2                                                                                          |
| SERINC1        | serine incorporator 1                                                                                            |
| SERINC3        | serine incorporator 3                                                                                            |

|          |                                                                                                     |
|----------|-----------------------------------------------------------------------------------------------------|
| SERINC4  | serine incorporator 4                                                                               |
| SERP1    | stress-associated endoplasmic reticulum protein 1                                                   |
| SERPINB8 | serpin peptidase inhibitor, clade B (ovalbumin), member 8                                           |
| SERPINH1 | serpin peptidase inhibitor, clade H (heat shock protein 47), member 1, (collagen binding protein 1) |
| SERPINI1 | serpin peptidase inhibitor, clade I (neuroserpin), member 1                                         |
| SERTAD1  | SERTA domain containing 1                                                                           |
| SERTAD2  | SERTA domain containing 2                                                                           |
| SERTAD3  | SERTA domain containing 3                                                                           |
| SESN1    | sestrin 1                                                                                           |
| SESN3    | sestrin 3                                                                                           |
| SET      | SET nuclear proto-oncogene                                                                          |
| SETBP1   | SET binding protein 1                                                                               |
| SETD1A   | SET domain containing 1A                                                                            |
| SETD1B   | SET domain containing 1B                                                                            |
| SETD2    | SET domain containing 2                                                                             |
| SETD4    | SET domain containing 4                                                                             |
| SETD5    | SET domain containing 5                                                                             |
| SETD6    | SET domain containing 6                                                                             |
| SETD9    | SET domain containing 9                                                                             |
| SETDB1   | SET domain, bifurcated 1                                                                            |
| SETDB2   | SET domain, bifurcated 2                                                                            |
| SETMAR   | SET domain and mariner transposase fusion gene                                                      |
| SETX     | senataxin                                                                                           |
| SF1      | splicing factor 1                                                                                   |
| SF3A1    | splicing factor 3a, subunit 1, 120kDa                                                               |
| SF3A2    | splicing factor 3a, subunit 2, 66kDa                                                                |
| SF3A3    | splicing factor 3a, subunit 3, 60kDa                                                                |
| SF3B1    | splicing factor 3b, subunit 1, 155kDa                                                               |
| SF3B2    | splicing factor 3b, subunit 2, 145kDa                                                               |
| SF3B3    | splicing factor 3b, subunit 3, 130kDa                                                               |
| SF3B4    | splicing factor 3b, subunit 4, 49kDa                                                                |
| SF3B5    | splicing factor 3b, subunit 5, 10kDa                                                                |
| SF3B6    | splicing factor 3b, subunit 6, 14kDa                                                                |
| SFI1     | Sfi1 homolog, spindle assembly associated (yeast)                                                   |
| SFMBT2   | Scm-like with four mbt domains 2                                                                    |
| SFN      | stratifin                                                                                           |
| SFPQ     | splicing factor proline/glutamine-rich                                                              |
| SFR1     | SWI5-dependent recombination repair 1                                                               |
| SFT2D1   | SFT2 domain containing 1                                                                            |
| SFT2D2   | SFT2 domain containing 2                                                                            |
| SFT2D3   | SFT2 domain containing 3                                                                            |



|          |                                                                       |
|----------|-----------------------------------------------------------------------|
| SFXN2    | sideroflexin 2                                                        |
| SFXN4    | sideroflexin 4                                                        |
| SFXN5    | sideroflexin 5                                                        |
| SGK494   | uncharacterized serine/threonine-protein kinase SgK494                |
| SGOL1    | shugoshin-like 1 ( <i>S. pombe</i> )                                  |
| SGOL2    | shugoshin-like 2 ( <i>S. pombe</i> )                                  |
| SGPP2    | sphingosine-1-phosphate phosphatase 2                                 |
| SGSH     | N-sulfoglucosamine sulfohydrolase                                     |
| SGSM2    | small G protein signaling modulator 2                                 |
| SGSM3    | small G protein signaling modulator 3                                 |
| SGTA     | small glutamine-rich tetratricopeptide repeat (TPR)-containing, alpha |
| SH2B1    | SH2B adaptor protein 1                                                |
| SH2B3    | SH2B adaptor protein 3                                                |
| SH2D2A   | SH2 domain containing 2A                                              |
| SH2D4B   | SH2 domain containing 4B                                              |
| SH3BGR13 | SH3 domain binding glutamate-rich protein like 3                      |
| SH3BP1   | SH3-domain binding protein 1                                          |
| SH3BP5L  | SH3-binding domain protein 5-like                                     |
| SH3D21   | SH3 domain containing 21                                              |
| SH3GL1   | SH3-domain GRB2-like 1                                                |
| SH3GLB1  | SH3-domain GRB2-like endophilin B1                                    |
| SH3KBP1  | SH3-domain kinase binding protein 1                                   |
| SH3RF1   | SH3 domain containing ring finger 1                                   |
| SHANK3   | SH3 and multiple ankyrin repeat domains 3                             |
| SHARPIN  | SHANK-associated RH domain interactor                                 |
| SHC1     | SHC (Src homology 2 domain containing) transforming protein 1         |
| SHF      | Src homology 2 domain containing F                                    |
| SHISA8   | shisa family member 8                                                 |
| SHMT2    | serine hydroxymethyltransferase 2 (mitochondrial)                     |
| SHOC2    | soc-2 suppressor of clear homolog ( <i>C. elegans</i> )               |
| SHPK     | sedoheptulokinase                                                     |
| SHQ1     | SHQ1, H/ACA ribonucleoprotein assembly factor                         |
| SHROOM1  | shroom family member 1                                                |
| SIAH2    | siah E3 ubiquitin protein ligase 2                                    |
| SIDT1    | SID1 transmembrane family, member 1                                   |
| SIGLEC10 | sialic acid binding Ig-like lectin 10                                 |
| SIGLEC5  | sialic acid binding Ig-like lectin 5                                  |
| SIGMAR1  | sigma non-opioid intracellular receptor 1                             |
| SIK2     | salt-inducible kinase 2                                               |
| SIK3     | SIK family kinase 3                                                   |
| SIN3A    | SIN3 transcription regulator family member A                          |

|          |                                                                                                         |
|----------|---------------------------------------------------------------------------------------------------------|
| SIPA1    | signal-induced proliferation-associated 1                                                               |
| SIPA1L3  | signal-induced proliferation-associated 1 like 3                                                        |
| SIRT1    | sirtuin 1                                                                                               |
| SIRT3    | sirtuin 3                                                                                               |
| SIRT5    | sirtuin 5                                                                                               |
| SIRT7    | sirtuin 7                                                                                               |
| SIT1     | signaling threshold regulating transmembrane adaptor 1                                                  |
| SIX5     | SIX homeobox 5                                                                                          |
| SKA2     | spindle and kinetochore associated complex subunit 2                                                    |
| SKA3     | spindle and kinetochore associated complex subunit 3                                                    |
| SKAP2    | src kinase associated phosphoprotein 2                                                                  |
| SKIDA1   | SKI/DACH domain containing 1                                                                            |
| SKIL     | SKI-like proto-oncogene                                                                                 |
| SKIV2L2  | superkiller viralicidic activity 2-like 2 ( <i>S. cerevisiae</i> )                                      |
| SKP1     | S-phase kinase-associated protein 1                                                                     |
| SLAIN1   | SLAIN motif family, member 1                                                                            |
| SLAMF6   | SLAM family member 6                                                                                    |
| SLAMF7   | SLAM family member 7                                                                                    |
| SLBP     | stem-loop binding protein                                                                               |
| SLC10A7  | solute carrier family 10, member 7                                                                      |
| SLC11A2  | solute carrier family 11 (proton-coupled divalent metal ion transporter), member 2                      |
| SLC12A2  | solute carrier family 12 (sodium/potassium/chloride transporter), member 2                              |
| SLC12A4  | solute carrier family 12 (potassium/chloride transporter), member 4                                     |
| SLC12A6  | solute carrier family 12 (potassium/chloride transporter), member 6                                     |
| SLC15A3  | solute carrier family 15 (oligopeptide transporter), member 3                                           |
| SLC15A4  | solute carrier family 15 (oligopeptide transporter), member 4                                           |
| SLC16A1  | solute carrier family 16 (monocarboxylate transporter), member 1                                        |
| SLC16A13 | solute carrier family 16, member 13                                                                     |
| SLC16A14 | solute carrier family 16, member 14                                                                     |
| SLC16A6  | solute carrier family 16, member 6                                                                      |
| SLC17A5  | solute carrier family 17 (acidic sugar transporter), member 5                                           |
| SLC18B1  | solute carrier family 18, subfamily B, member 1                                                         |
| SLC1A1   | solute carrier family 1 (neuronal/epithelial high affinity glutamate transporter, system Xag), member 1 |
| SLC1A4   | solute carrier family 1 (glutamate/neutral amino acid transporter), member 4                            |
| SLC20A1  | solute carrier family 20 (phosphate transporter), member 1                                              |
| SLC22A20 | solute carrier family 22, member 20                                                                     |
| SLC23A1  | solute carrier family 23 (ascorbic acid transporter), member 1                                          |
| SLC25A10 | solute carrier family 25 (mitochondrial carrier; dicarboxylate transporter), member 10                  |
| SLC25A11 | solute carrier family 25 (mitochondrial carrier; oxoglutarate carrier), member 11                       |
| SLC25A13 | solute carrier family 25 (aspartate/glutamate carrier), member 13                                       |

|             |                                                                                             |
|-------------|---------------------------------------------------------------------------------------------|
| SLC25A16    | solute carrier family 25 (mitochondrial carrier), member 16                                 |
| SLC25A19    | solute carrier family 25 (mitochondrial thiamine pyrophosphate carrier), member 19          |
| SLC25A22    | solute carrier family 25 (mitochondrial carrier: glutamate), member 22                      |
| SLC25A23    | solute carrier family 25 (mitochondrial carrier; phosphate carrier), member 23              |
| SLC25A25    | solute carrier family 25 (mitochondrial carrier; phosphate carrier), member 25              |
| SLC25A28    | solute carrier family 25 (mitochondrial iron transporter), member 28                        |
| SLC25A3     | solute carrier family 25 (mitochondrial carrier; phosphate carrier), member 3               |
| SLC25A32    | solute carrier family 25 (mitochondrial folate carrier), member 32                          |
| SLC25A33    | solute carrier family 25 (pyrimidine nucleotide carrier), member 33                         |
| SLC25A36    | solute carrier family 25 (pyrimidine nucleotide carrier), member 36                         |
| SLC25A38    | solute carrier family 25, member 38                                                         |
| SLC25A39    | solute carrier family 25, member 39                                                         |
| SLC25A4     | solute carrier family 25 (mitochondrial carrier; adenine nucleotide translocator), member 4 |
| SLC25A40    | solute carrier family 25, member 40                                                         |
| SLC25A42    | solute carrier family 25, member 42                                                         |
| SLC25A45    | solute carrier family 25, member 45                                                         |
| SLC25A46    | solute carrier family 25, member 46                                                         |
| SLC25A5     | solute carrier family 25 (mitochondrial carrier; adenine nucleotide translocator), member 5 |
| SLC25A5-AS1 | SLC25A5 antisense RNA 1                                                                     |
| SLC25A51    | solute carrier family 25, member 51                                                         |
| SLC25A6     | solute carrier family 25 (mitochondrial carrier; adenine nucleotide translocator), member 6 |
| SLC26A11    | solute carrier family 26 (anion exchanger), member 11                                       |
| SLC26A2     | solute carrier family 26 (anion exchanger), member 2                                        |
| SLC26A6     | solute carrier family 26 (anion exchanger), member 6                                        |
| SLC27A3     | solute carrier family 27 (fatty acid transporter), member 3                                 |
| SLC27A5     | solute carrier family 27 (fatty acid transporter), member 5                                 |
| SLC2A1      | solute carrier family 2 (facilitated glucose transporter), member 1                         |
| SLC2A5      | solute carrier family 2 (facilitated glucose/fructose transporter), member 5                |
| SLC30A6     | solute carrier family 30 (zinc transporter), member 6                                       |
| SLC31A1     | solute carrier family 31 (copper transporter), member 1                                     |
| SLC33A1     | solute carrier family 33 (acetyl-CoA transporter), member 1                                 |
| SLC35A1     | solute carrier family 35 (CMP-sialic acid transporter), member A1                           |
| SLC35A2     | solute carrier family 35 (UDP-galactose transporter), member A2                             |
| SLC35A3     | solute carrier family 35 (UDP-N-acetylglucosamine (UDP-GlcNAc) transporter), member A3      |
| SLC35A4     | solute carrier family 35, member A4                                                         |
| SLC35A5     | solute carrier family 35, member A5                                                         |
| SLC35B1     | solute carrier family 35, member B1                                                         |

|          |                                                                                               |
|----------|-----------------------------------------------------------------------------------------------|
| SLC35B2  | solute carrier family 35 (adenosine 3'-phospho 5'-phosphosulfate transporter), member B2      |
| SLC35B3  | solute carrier family 35 (adenosine 3'-phospho 5'-phosphosulfate transporter), member B3      |
| SLC35C2  | solute carrier family 35 (GDP-fucose transporter), member C2                                  |
| SLC35E1  | solute carrier family 35, member E1                                                           |
| SLC35E3  | solute carrier family 35, member E3                                                           |
| SLC35F2  | solute carrier family 35, member F2                                                           |
| SLC35F5  | solute carrier family 35, member F5                                                           |
| SLC35F6  | solute carrier family 35, member F6                                                           |
| SLC35G1  | solute carrier family 35, member G1                                                           |
| SLC36A1  | solute carrier family 36 (proton/amino acid symporter), member 1                              |
| SLC37A4  | solute carrier family 37 (glucose-6-phosphate transporter), member 4                          |
| SLC38A1  | solute carrier family 38, member 1                                                            |
| SLC38A10 | solute carrier family 38, member 10                                                           |
| SLC38A2  | solute carrier family 38, member 2                                                            |
| SLC38A6  | solute carrier family 38, member 6                                                            |
| SLC39A1  | solute carrier family 39 (zinc transporter), member 1                                         |
| SLC39A10 | solute carrier family 39 (zinc transporter), member 10                                        |
| SLC39A13 | solute carrier family 39 (zinc transporter), member 13                                        |
| SLC39A3  | solute carrier family 39 (zinc transporter), member 3                                         |
| SLC39A6  | solute carrier family 39 (zinc transporter), member 6                                         |
| SLC39A8  | solute carrier family 39 (zinc transporter), member 8                                         |
| SLC39A9  | solute carrier family 39, member 9                                                            |
| SLC3A2   | solute carrier family 3 (amino acid transporter heavy chain), member 2                        |
| SLC43A3  | solute carrier family 43, member 3                                                            |
| SLC44A1  | solute carrier family 44 (choline transporter), member 1                                      |
| SLC44A2  | solute carrier family 44 (choline transporter), member 2                                      |
| SLC45A2  | solute carrier family 45, member 2                                                            |
| SLC4A1AP | solute carrier family 4 (anion exchanger), member 1, adaptor protein                          |
| SLC50A1  | solute carrier family 50 (sugar efflux transporter), member 1                                 |
| SLC5A3   | solute carrier family 5 (sodium/myo-inositol cotransporter), member 3                         |
| SLC5A6   | solute carrier family 5 (sodium/multivitamin and iodide cotransporter), member 6              |
| SLC6A16  | solute carrier family 6, member 16                                                            |
| SLC6A20  | solute carrier family 6 (proline IMINO transporter), member 20                                |
| SLC6A6   | solute carrier family 6 (neurotransmitter transporter), member 6                              |
| SLC7A1   | solute carrier family 7 (cationic amino acid transporter, $\gamma^+$ system), member 1        |
| SLC7A5   | solute carrier family 7 (amino acid transporter light chain, L system), member 5              |
| SLC7A5P2 | solute carrier family 7 (amino acid transporter light chain, L system), member 5 pseudogene 2 |
| SLC7A6OS | solute carrier family 7, member 6 opposite strand                                             |
| SLC9A1   | solute carrier family 9, subfamily A (NHE1, cation proton antiporter 1), member 1             |

|          |                                                                                                                 |
|----------|-----------------------------------------------------------------------------------------------------------------|
| SLC9A3R1 | solute carrier family 9, subfamily A (NHE3, cation proton antiporter 3), member 3 regulator 1                   |
| SLC9A5   | solute carrier family 9, subfamily A (NHE5, cation proton antiporter 5), member 5                               |
| SLC9A8   | solute carrier family 9, subfamily A (NHE8, cation proton antiporter 8), member 8                               |
| SLC9B1   | solute carrier family 9, subfamily B (NHA1, cation proton antiporter 1), member 1                               |
| SLFN12L  | schlafen family member 12-like                                                                                  |
| SLFN13   | schlafen family member 13                                                                                       |
| SLFNL1   | schlafen-like 1                                                                                                 |
| SLIRP    | SRA stem-loop interacting RNA binding protein                                                                   |
| SLMAP    | sarcolemma associated protein                                                                                   |
| SLTM     | SAFB-like, transcription modulator                                                                              |
| SLU7     | SLU7 splicing factor homolog ( <i>S. cerevisiae</i> )                                                           |
| SLX4IP   | SLX4 interacting protein                                                                                        |
| SMAD1    | SMAD family member 1                                                                                            |
| SMAD4    | SMAD family member 4                                                                                            |
| SMAP1    | small ArfGAP 1                                                                                                  |
| SMAP2    | small ArfGAP2                                                                                                   |
| SMARCA2  | SWI/SNF related, matrix associated, actin dependent regulator of chromatin, subfamily a, member 2               |
| SMARCA4  | SWI/SNF related, matrix associated, actin dependent regulator of chromatin, subfamily a, member 4               |
| SMARCA5  | SWI/SNF related, matrix associated, actin dependent regulator of chromatin, subfamily a, member 5               |
| SMARCAD1 | SWI/SNF-related, matrix-associated actin-dependent regulator of chromatin, subfamily a, containing DEAD/H box 1 |
| SMARCAL1 | SWI/SNF related, matrix associated, actin dependent regulator of chromatin, subfamily a-like 1                  |
| SMARCC1  | SWI/SNF related, matrix associated, actin dependent regulator of chromatin, subfamily c, member 1               |
| SMARCC2  | SWI/SNF related, matrix associated, actin dependent regulator of chromatin, subfamily c, member 2               |
| SMARCD2  | SWI/SNF related, matrix associated, actin dependent regulator of chromatin, subfamily d, member 2               |
| SMARCE1  | SWI/SNF related, matrix associated, actin dependent regulator of chromatin, subfamily e, member 1               |
| SMC1A    | structural maintenance of chromosomes 1A                                                                        |
| SMC2     | structural maintenance of chromosomes 2                                                                         |
| SMC3     | structural maintenance of chromosomes 3                                                                         |
| SMC4     | structural maintenance of chromosomes 4                                                                         |
| SMCHD1   | structural maintenance of chromosomes flexible hinge domain containing 1                                        |
| SMCR8    | Smith-Magenis syndrome chromosome region, candidate 8                                                           |
| SMDT1    | single-pass membrane protein with aspartate-rich tail 1                                                         |
| SMEK1    | SMEK homolog 1, suppressor of mek1 ( <i>Dictyostelium</i> )                                                     |
| SMEK2    | SMEK homolog 2, suppressor of mek1 ( <i>Dictyostelium</i> )                                                     |

|          |                                                                                  |
|----------|----------------------------------------------------------------------------------|
| SMG1     | SMG1 phosphatidylinositol 3-kinase-related kinase                                |
| SMG5     | SMG5 nonsense mediated mRNA decay factor                                         |
| SMG7     | SMG7 nonsense mediated mRNA decay factor                                         |
| SMG7-AS1 | SMG7 antisense RNA 1                                                             |
| SMG8     | SMG8 nonsense mediated mRNA decay factor                                         |
| SMG9     | SMG9 nonsense mediated mRNA decay factor                                         |
| SMIM12   | small integral membrane protein 12                                               |
| SMIM14   | small integral membrane protein 14                                               |
| SMIM15   | small integral membrane protein 15                                               |
| SMIM20   | small integral membrane protein 20                                               |
| SMIM4    | small integral membrane protein 4                                                |
| SMIM7    | small integral membrane protein 7                                                |
| SMPD1    | sphingomyelin phosphodiesterase 1, acid lysosomal                                |
| SMPD4    | sphingomyelin phosphodiesterase 4, neutral membrane (neutral sphingomyelinase-3) |
| SMYD4    | SET and MYND domain containing 4                                                 |
| SNAP29   | synaptosomal-associated protein, 29kDa                                           |
| SNAP47   | synaptosomal-associated protein, 47kDa                                           |
| SNAPC3   | small nuclear RNA activating complex, polypeptide 3, 50kDa                       |
| SNAPC4   | small nuclear RNA activating complex, polypeptide 4, 190kDa                      |
| SNAPC5   | small nuclear RNA activating complex, polypeptide 5, 19kDa                       |
| SNAPIN   | SNAP-associated protein                                                          |
| SND1     | staphylococcal nuclease and tudor domain containing 1                            |
| SNF8     | SNF8, ESCRT-II complex subunit                                                   |
| SNHG1    | small nucleolar RNA host gene 1                                                  |
| SNHG11   | small nucleolar RNA host gene 11                                                 |
| SNHG12   | small nucleolar RNA host gene 12                                                 |
| SNHG15   | small nucleolar RNA host gene 15                                                 |
| SNHG20   | small nucleolar RNA host gene 20                                                 |
| SNHG3    | small nucleolar RNA host gene 3                                                  |
| SNHG4    | small nucleolar RNA host gene 4                                                  |
| SNHG5    | small nucleolar RNA host gene 5                                                  |
| SNHG6    | small nucleolar RNA host gene 6                                                  |
| SNHG7    | small nucleolar RNA host gene 7                                                  |
| SNHG8    | small nucleolar RNA host gene 8                                                  |
| SNHG9    | small nucleolar RNA host gene 9                                                  |
| SNN      | stannin                                                                          |
| SNORA1   | small nucleolar RNA, H/ACA box 1                                                 |
| SNORA10  | small nucleolar RNA, H/ACA box 10                                                |
| SNORA13  | small nucleolar RNA, H/ACA box 13                                                |
| SNORA14B | small nucleolar RNA, H/ACA box 14B                                               |
| SNORA16A | small nucleolar RNA, H/ACA box 16A                                               |

|          |                                    |
|----------|------------------------------------|
| SNORA17  | small nucleolar RNA, H/ACA box 17  |
| SNORA18  | small nucleolar RNA, H/ACA box 18  |
| SNORA20  | small nucleolar RNA, H/ACA box 20  |
| SNORA21  | small nucleolar RNA, H/ACA box 21  |
| SNORA24  | small nucleolar RNA, H/ACA box 24  |
| SNORA25  | small nucleolar RNA, H/ACA box 25  |
| SNORA26  | small nucleolar RNA, H/ACA box 26  |
| SNORA27  | small nucleolar RNA, H/ACA box 27  |
| SNORA31  | small nucleolar RNA, H/ACA box 31  |
| SNORA32  | small nucleolar RNA, H/ACA box 32  |
| SNORA37  | small nucleolar RNA, H/ACA box 37  |
| SNORA4   | small nucleolar RNA, H/ACA box 4   |
| SNORA40  | small nucleolar RNA, H/ACA box 40  |
| SNORA43  | small nucleolar RNA, H/ACA box 43  |
| SNORA44  | small nucleolar RNA, H/ACA box 44  |
| SNORA45A | small nucleolar RNA, H/ACA box 45A |
| SNORA48  | small nucleolar RNA, H/ACA box 48  |
| SNORA52  | small nucleolar RNA, H/ACA box 52  |
| SNORA57  | small nucleolar RNA, H/ACA box 57  |
| SNORA6   | small nucleolar RNA, H/ACA box 6   |
| SNORA61  | small nucleolar RNA, H/ACA box 61  |
| SNORA63  | small nucleolar RNA, H/ACA box 63  |
| SNORA64  | small nucleolar RNA, H/ACA box 64  |
| SNORA65  | small nucleolar RNA, H/ACA box 65  |
| SNORA67  | small nucleolar RNA, H/ACA box 67  |
| SNORA68  | small nucleolar RNA, H/ACA box 68  |
| SNORA70  | small nucleolar RNA, H/ACA box 70  |
| SNORA71A | small nucleolar RNA, H/ACA box 71A |
| SNORA71B | small nucleolar RNA, H/ACA box 71B |
| SNORA71D | small nucleolar RNA, H/ACA box 71D |
| SNORA71E | small nucleolar RNA, H/ACA box 71E |
| SNORA72  | small nucleolar RNA, H/ACA box 72  |
| SNORA76C | small nucleolar RNA, H/ACA box 76C |
| SNORA78  | small nucleolar RNA, H/ACA box 78  |
| SNORA7A  | small nucleolar RNA, H/ACA box 7A  |
| SNORA8   | small nucleolar RNA, H/ACA box 8   |
| SNORA80B | small nucleolar RNA, H/ACA box 80B |
| SNORA81  | small nucleolar RNA, H/ACA box 81  |
| SNORA84  | small nucleolar RNA, H/ACA box 84  |
| SNORA9   | small nucleolar RNA, H/ACA box 9   |
| SNORD10  | small nucleolar RNA, C/D box 10    |

|           |                                   |
|-----------|-----------------------------------|
| SNORD101  | small nucleolar RNA, C/D box 101  |
| SNORD102  | small nucleolar RNA, C/D box 102  |
| SNORD104  | small nucleolar RNA, C/D box 104  |
| SNORD105  | small nucleolar RNA, C/D box 105  |
| SNORD105B | small nucleolar RNA, C/D box 105B |
| SNORD110  | small nucleolar RNA, C/D box 110  |
| SNORD12   | small nucleolar RNA, C/D box 12   |
| SNORD12B  | small nucleolar RNA, C/D box 12B  |
| SNORD12C  | small nucleolar RNA, C/D box 12C  |
| SNORD15A  | small nucleolar RNA, C/D box 15A  |
| SNORD15B  | small nucleolar RNA, C/D box 15B  |
| SNORD16   | small nucleolar RNA, C/D box 16   |
| SNORD17   | small nucleolar RNA, C/D box 17   |
| SNORD18A  | small nucleolar RNA, C/D box 18A  |
| SNORD18B  | small nucleolar RNA, C/D box 18B  |
| SNORD1A   | small nucleolar RNA, C/D box 1A   |
| SNORD1B   | small nucleolar RNA, C/D box 1B   |
| SNORD1C   | small nucleolar RNA, C/D box 1C   |
| SNORD2    | small nucleolar RNA, C/D box 2    |
| SNORD21   | small nucleolar RNA, C/D box 21   |
| SNORD22   | small nucleolar RNA, C/D box 22   |
| SNORD24   | small nucleolar RNA, C/D box 24   |
| SNORD25   | small nucleolar RNA, C/D box 25   |
| SNORD26   | small nucleolar RNA, C/D box 26   |
| SNORD27   | small nucleolar RNA, C/D box 27   |
| SNORD28   | small nucleolar RNA, C/D box 28   |
| SNORD29   | small nucleolar RNA, C/D box 29   |
| SNORD30   | small nucleolar RNA, C/D box 30   |
| SNORD31   | small nucleolar RNA, C/D box 31   |
| SNORD32A  | small nucleolar RNA, C/D box 32A  |
| SNORD33   | small nucleolar RNA, C/D box 33   |
| SNORD34   | small nucleolar RNA, C/D box 34   |
| SNORD35A  | small nucleolar RNA, C/D box 35A  |
| SNORD35B  | small nucleolar RNA, C/D box 35B  |
| SNORD36B  | small nucleolar RNA, C/D box 36B  |
| SNORD37   | small nucleolar RNA, C/D box 37   |
| SNORD38A  | small nucleolar RNA, C/D box 38A  |
| SNORD38B  | small nucleolar RNA, C/D box 38B  |
| SNORD42A  | small nucleolar RNA, C/D box 42A  |
| SNORD42B  | small nucleolar RNA, C/D box 42B  |
| SNORD43   | small nucleolar RNA, C/D box 43   |



|          |                                  |
|----------|----------------------------------|
| SNORD44  | small nucleolar RNA, C/D box 44  |
| SNORD45A | small nucleolar RNA, C/D box 45A |
| SNORD45B | small nucleolar RNA, C/D box 45B |
| SNORD45C | small nucleolar RNA, C/D box 45C |
| SNORD46  | small nucleolar RNA, C/D box 46  |
| SNORD47  | small nucleolar RNA, C/D box 47  |
| SNORD48  | small nucleolar RNA, C/D box 48  |
| SNORD49A | small nucleolar RNA, C/D box 49A |
| SNORD49B | small nucleolar RNA, C/D box 49B |
| SNORD4A  | small nucleolar RNA, C/D box 4A  |
| SNORD4B  | small nucleolar RNA, C/D box 4B  |
| SNORD5   | small nucleolar RNA, C/D box 5   |
| SNORD50A | small nucleolar RNA, C/D box 50A |
| SNORD50B | small nucleolar RNA, C/D box 50B |
| SNORD51  | small nucleolar RNA, C/D box 51  |
| SNORD52  | small nucleolar RNA, C/D box 52  |
| SNORD54  | small nucleolar RNA, C/D box 54  |
| SNORD55  | small nucleolar RNA, C/D box 55  |
| SNORD56B | small nucleolar RNA, C/D box 56B |
| SNORD57  | small nucleolar RNA, C/D box 57  |
| SNORD58A | small nucleolar RNA, C/D box 58A |
| SNORD58B | small nucleolar RNA, C/D box 58B |
| SNORD58C | small nucleolar RNA, C/D box 58C |
| SNORD59A | small nucleolar RNA, C/D box 59A |
| SNORD6   | small nucleolar RNA, C/D box 6   |
| SNORD60  | small nucleolar RNA, C/D box 60  |
| SNORD61  | small nucleolar RNA, C/D box 61  |
| SNORD65  | small nucleolar RNA, C/D box 65  |
| SNORD68  | small nucleolar RNA, C/D box 68  |
| SNORD72  | small nucleolar RNA, C/D box 72  |
| SNORD73A | small nucleolar RNA, C/D box 73A |
| SNORD74  | small nucleolar RNA, C/D box 74  |
| SNORD75  | small nucleolar RNA, C/D box 75  |
| SNORD76  | small nucleolar RNA, C/D box 76  |
| SNORD77  | small nucleolar RNA, C/D box 77  |
| SNORD81  | small nucleolar RNA, C/D box 81  |
| SNORD82  | small nucleolar RNA, C/D box 82  |
| SNORD83A | small nucleolar RNA, C/D box 83A |
| SNORD83B | small nucleolar RNA, C/D box 83B |
| SNORD88A | small nucleolar RNA, C/D box 88A |
| SNORD88B | small nucleolar RNA, C/D box 88B |

|          |                                                                                 |
|----------|---------------------------------------------------------------------------------|
| SNORD88C | small nucleolar RNA, C/D box 88C                                                |
| SNORD89  | small nucleolar RNA, C/D box 89                                                 |
| SNORD93  | small nucleolar RNA, C/D box 93                                                 |
| SNORD95  | small nucleolar RNA, C/D box 95                                                 |
| SNORD96A | small nucleolar RNA, C/D box 96A                                                |
| SNORD99  | small nucleolar RNA, C/D box 99                                                 |
| SNRNP200 | small nuclear ribonucleoprotein 200kDa (U5)                                     |
| SNRNP25  | small nuclear ribonucleoprotein 25kDa (U11/U12)                                 |
| SNRNP27  | small nuclear ribonucleoprotein 27kDa (U4/U6.U5)                                |
| SNRNP35  | small nuclear ribonucleoprotein 35kDa (U11/U12)                                 |
| SNRNP70  | small nuclear ribonucleoprotein 70kDa (U1)                                      |
| SNRPA    | small nuclear ribonucleoprotein polypeptide A                                   |
| SNRPA1   | small nuclear ribonucleoprotein polypeptide A'                                  |
| SNRPB    | small nuclear ribonucleoprotein polypeptides B and B1                           |
| SNRPC    | small nuclear ribonucleoprotein polypeptide C                                   |
| SNRPD1   | small nuclear ribonucleoprotein D1 polypeptide 16kDa                            |
| SNRPD2   | small nuclear ribonucleoprotein D2 polypeptide 16.5kDa                          |
| SNRPD3   | small nuclear ribonucleoprotein D3 polypeptide 18kDa                            |
| SNRPE    | small nuclear ribonucleoprotein polypeptide E                                   |
| SNRPG    | small nuclear ribonucleoprotein polypeptide G                                   |
| SNTB2    | syntrophin, beta 2 (dystrophin-associated protein A1, 59kDa, basic component 2) |
| SNUPN    | snurportin 1                                                                    |
| SNX1     | sorting nexin 1                                                                 |
| SNX14    | sorting nexin 14                                                                |
| SNX16    | sorting nexin 16                                                                |
| SNX17    | sorting nexin 17                                                                |
| SNX19    | sorting nexin 19                                                                |
| SNX21    | sorting nexin family member 21                                                  |
| SNX29    | sorting nexin 29                                                                |
| SNX3     | sorting nexin 3                                                                 |
| SNX30    | sorting nexin family member 30                                                  |
| SNX5     | sorting nexin 5                                                                 |
| SNX9     | sorting nexin 9                                                                 |
| SOCS1    | suppressor of cytokine signaling 1                                              |
| SOCS5    | suppressor of cytokine signaling 5                                              |
| SOD2     | superoxide dismutase 2, mitochondrial                                           |
| SON      | SON DNA binding protein                                                         |
| SORL1    | sortilin-related receptor, L(DLR class) A repeats containing                    |
| SOWAHD   | so sondowah ankyrin repeat domain family member D                               |
| SOX12    | SRY (sex determining region Y)-box 12                                           |
| SOX15    | SRY (sex determining region Y)-box 15                                           |

|           |                                                                     |
|-----------|---------------------------------------------------------------------|
| SOX4      | SRY (sex determining region Y)-box 4                                |
| SOX9      | SRY (sex determining region Y)-box 9                                |
| SP1       | Sp1 transcription factor                                            |
| SP100     | SP100 nuclear antigen                                               |
| SP140     | SP140 nuclear body protein                                          |
| SP3       | Sp3 transcription factor                                            |
| SP4       | Sp4 transcription factor                                            |
| SPACA5    | sperm acrosome associated 5                                         |
| SPAG1     | sperm associated antigen 1                                          |
| SPAG16    | sperm associated antigen 16                                         |
| SPAG5     | sperm associated antigen 5                                          |
| SPAG5-AS1 | SPAG5 antisense RNA 1                                               |
| SPAG7     | sperm associated antigen 7                                          |
| SPAG8     | sperm associated antigen 8                                          |
| SPAG9     | sperm associated antigen 9                                          |
| SPAST     | spastin                                                             |
| SPATA2    | spermatogenesis associated 2                                        |
| SPATA24   | spermatogenesis associated 24                                       |
| SPATA2L   | spermatogenesis associated 2-like                                   |
| SPATA32   | spermatogenesis associated 32                                       |
| SPATA33   | spermatogenesis associated 33                                       |
| SPATA4    | spermatogenesis associated 4                                        |
| SPATA5    | spermatogenesis associated 5                                        |
| SPATA5L1  | spermatogenesis associated 5-like 1                                 |
| SPATA6L   | spermatogenesis associated 6-like                                   |
| SPATC1    | spermatogenesis and centriole associated 1                          |
| SPATS2    | spermatogenesis associated, serine-rich 2                           |
| SPCS2     | signal peptidase complex subunit 2 homolog ( <i>S. cerevisiae</i> ) |
| SPDEF     | SAM pointed domain containing ETS transcription factor              |
| SPDYA     | speedy/RINGO cell cycle regulator family member A                   |
| SPEF1     | sperm flagellar 1                                                   |
| SPEN      | spen family transcriptional repressor                               |
| SPERT     | spermatid associated                                                |
| SPG11     | spastic paraplegia 11 (autosomal recessive)                         |
| SPG21     | spastic paraplegia 21 (autosomal recessive, Mast syndrome)          |
| SPHK2     | sphingosine kinase 2                                                |
| SPI1      | Spi-1 proto-oncogene                                                |
| SPIB      | Spi-B transcription factor (Spi-1/PU.1 related)                     |
| SPICE1    | spindle and centriole associated protein 1                          |
| SPN       | sialophorin                                                         |
| SPNS1     | spinster homolog 1 ( <i>Drosophila</i> )                            |

|                |                                                                                                             |
|----------------|-------------------------------------------------------------------------------------------------------------|
| <b>SPON2</b>   | <b>spondin 2, extracellular matrix protein</b>                                                              |
| <b>SPOP</b>    | <b>speckle-type POZ protein</b>                                                                             |
| <b>SPPL2A</b>  | <b>signal peptide peptidase like 2A</b>                                                                     |
| <b>SPPL2B</b>  | <b>signal peptide peptidase like 2B</b>                                                                     |
| <b>SPRED2</b>  | <b>sprouty-related, EVH1 domain containing 2</b>                                                            |
| <b>SPRN</b>    | <b>shadow of prion protein homolog (zebrafish)</b>                                                          |
| <b>SPRTN</b>   | <b>SprT-like N-terminal domain</b>                                                                          |
| <b>SPRYD4</b>  | <b>SPRY domain containing 4</b>                                                                             |
| <b>SPSB2</b>   | <b>splA/ryanodine receptor domain and SOCS box containing 2</b>                                             |
| <b>SPTBN4</b>  | <b>spectrin, beta, non-erythrocytic 4</b>                                                                   |
| <b>SPTBN5</b>  | <b>spectrin, beta, non-erythrocytic 5</b>                                                                   |
| <b>SPTLC1</b>  | <b>serine palmitoyltransferase, long chain base subunit 1</b>                                               |
| <b>SPTY2D1</b> | <b>SPT2, Suppressor of Ty, domain containing 1 (<i>S. cerevisiae</i>)</b>                                   |
| <b>SQRDL</b>   | <b>sulfide quinone reductase-like (yeast)</b>                                                               |
| <b>SRA1</b>    | <b>steroid receptor RNA activator 1</b>                                                                     |
| <b>SRCAP</b>   | <b>Snf2-related CREBBP activator protein</b>                                                                |
| <b>SRD5A1</b>  | <b>steroid-5-alpha-reductase, alpha polypeptide 1 (3-oxo-5 alpha-steroid delta 4-dehydrogenase alpha 1)</b> |
| <b>SREBF1</b>  | <b>sterol regulatory element binding transcription factor 1</b>                                             |
| <b>SREBF2</b>  | <b>sterol regulatory element binding transcription factor 2</b>                                             |
| <b>SREK1</b>   | <b>splicing regulatory glutamine/lysine-rich protein 1</b>                                                  |
| <b>SRF</b>     | <b>serum response factor (c-fos serum response element-binding transcription factor)</b>                    |
| <b>SRFBP1</b>  | <b>serum response factor binding protein 1</b>                                                              |
| <b>SRGAP1</b>  | <b>SLIT-ROBO Rho GTPase activating protein 1</b>                                                            |
| <b>SRGN</b>    | <b>serglycin</b>                                                                                            |
| <b>SRP14</b>   | <b>signal recognition particle 14kDa (homologous Alu RNA binding protein)</b>                               |
| <b>SRP19</b>   | <b>signal recognition particle 19kDa</b>                                                                    |
| <b>SRP54</b>   | <b>signal recognition particle 54kDa</b>                                                                    |
| <b>SRP68</b>   | <b>signal recognition particle 68kDa</b>                                                                    |
| <b>SRP9</b>    | <b>signal recognition particle 9kDa</b>                                                                     |
| <b>SRPK1</b>   | <b>SRSF protein kinase 1</b>                                                                                |
| <b>SRRD</b>    | <b>SRR1 domain containing</b>                                                                               |
| <b>SRRM1</b>   | <b>serine/arginine repetitive matrix 1</b>                                                                  |
| <b>SRRM2</b>   | <b>serine/arginine repetitive matrix 2</b>                                                                  |
| <b>SRRM3</b>   | <b>serine/arginine repetitive matrix 3</b>                                                                  |
| <b>SRRT</b>    | <b>serrate, RNA effector molecule</b>                                                                       |
| <b>SRSF1</b>   | <b>serine/arginine-rich splicing factor 1</b>                                                               |
| <b>SRSF10</b>  | <b>serine/arginine-rich splicing factor 10</b>                                                              |
| <b>SRSF11</b>  | <b>serine/arginine-rich splicing factor 11</b>                                                              |
| <b>SRSF2</b>   | <b>serine/arginine-rich splicing factor 2</b>                                                               |
| <b>SRSF3</b>   | <b>serine/arginine-rich splicing factor 3</b>                                                               |
| <b>SRSF4</b>   | <b>serine/arginine-rich splicing factor 4</b>                                                               |

|            |                                                                                                               |
|------------|---------------------------------------------------------------------------------------------------------------|
| SRSF5      | serine/arginine-rich splicing factor 5                                                                        |
| SRSF6      | serine/arginine-rich splicing factor 6                                                                        |
| SRSF7      | serine/arginine-rich splicing factor 7                                                                        |
| SRSF8      | serine/arginine-rich splicing factor 8                                                                        |
| SRSF9      | serine/arginine-rich splicing factor 9                                                                        |
| SS18       | synovial sarcoma translocation, chromosome 18                                                                 |
| SSB        | Sjogren syndrome antigen B (autoantigen La)                                                                   |
| SSBP1      | single-stranded DNA binding protein 1, mitochondrial                                                          |
| SSBP2      | single-stranded DNA binding protein 2                                                                         |
| SSBP3      | single stranded DNA binding protein 3                                                                         |
| SSH1       | slingshot protein phosphatase 1                                                                               |
| SSH2       | slingshot protein phosphatase 2                                                                               |
| SSNA1      | Sjogren syndrome nuclear autoantigen 1                                                                        |
| SSR1       | signal sequence receptor, alpha                                                                               |
| SSR3       | signal sequence receptor, gamma (translocon-associated protein gamma)                                         |
| SSSCA1     | Sjogren syndrome/scleroderma autoantigen 1                                                                    |
| SSU72      | SSU72 RNA polymerase II CTD phosphatase homolog ( <i>S. cerevisiae</i> )                                      |
| ST13       | suppression of tumorigenicity 13 (colon carcinoma) (Hsp70 interacting protein)                                |
| ST3GAL2    | ST3 beta-galactoside alpha-2,3-sialyltransferase 2                                                            |
| ST3GAL3    | ST3 beta-galactoside alpha-2,3-sialyltransferase 3                                                            |
| ST3GAL5    | ST3 beta-galactoside alpha-2,3-sialyltransferase 5                                                            |
| ST3GAL6    | ST3 beta-galactoside alpha-2,3-sialyltransferase 6                                                            |
| ST5        | suppression of tumorigenicity 5                                                                               |
| ST6GAL1    | ST6 beta-galactosamide alpha-2,6-sialyltransferase 1                                                          |
| ST6GALNAC3 | ST6 (alpha-N-acetyl-neuraminyl-2,3-beta-galactosyl-1,3)-N-acetylgalactosaminide alpha-2,6-sialyltransferase 3 |
| ST6GALNAC6 | ST6 (alpha-N-acetyl-neuraminyl-2,3-beta-galactosyl-1,3)-N-acetylgalactosaminide alpha-2,6-sialyltransferase 6 |
| ST7-AS1    | ST7 antisense RNA 1                                                                                           |
| ST7L       | suppression of tumorigenicity 7 like                                                                          |
| ST8SIA4    | ST8 alpha-N-acetyl-neuraminide alpha-2,8-sialyltransferase 4                                                  |
| STAG1      | stromal antigen 1                                                                                             |
| STAG3L4    | stromal antigen 3-like 4 (pseudogene)                                                                         |
| STAM       | signal transducing adaptor molecule (SH3 domain and ITAM motif) 1                                             |
| STAM2      | signal transducing adaptor molecule (SH3 domain and ITAM motif) 2                                             |
| STAMBPL1   | STAM binding protein-like 1                                                                                   |
| STAP1      | signal transducing adaptor family member 1                                                                    |
| STARD10    | StAR-related lipid transfer (START) domain containing 10                                                      |
| STARD3NL   | STARD3 N-terminal like                                                                                        |
| STARD4     | StAR-related lipid transfer (START) domain containing 4                                                       |
| STARD7     | StAR-related lipid transfer (START) domain containing 7                                                       |
| STAT1      | signal transducer and activator of transcription 1, 91kDa                                                     |

|              |                                                                                  |
|--------------|----------------------------------------------------------------------------------|
| STAT3        | signal transducer and activator of transcription 3 (acute-phase response factor) |
| STAT4        | signal transducer and activator of transcription 4                               |
| STAT5A       | signal transducer and activator of transcription 5A                              |
| STAT5B       | signal transducer and activator of transcription 5B                              |
| STAT6        | signal transducer and activator of transcription 6, interleukin-4 induced        |
| STAU2        | staufen double-stranded RNA binding protein 2                                    |
| STIL         | SCL/TAL1 interrupting locus                                                      |
| STIM1        | stromal interaction molecule 1                                                   |
| STIM2        | stromal interaction molecule 2                                                   |
| STIP1        | stress-induced phosphoprotein 1                                                  |
| STK11IP      | serine/threonine kinase 11 interacting protein                                   |
| STK16        | serine/threonine kinase 16                                                       |
| STK17A       | serine/threonine kinase 17a                                                      |
| STK17B       | serine/threonine kinase 17b                                                      |
| STK3         | serine/threonine kinase 3                                                        |
| STK36        | serine/threonine kinase 36                                                       |
| STK38L       | serine/threonine kinase 38 like                                                  |
| STK4         | serine/threonine kinase 4                                                        |
| STK40        | serine/threonine kinase 40                                                       |
| STOM         | stomatin                                                                         |
| STOML2       | stomatin (EPB72)-like 2                                                          |
| STRADA       | STE20-related kinase adaptor alpha                                               |
| STRADB       | STE20-related kinase adaptor beta                                                |
| STRAP        | serine/threonine kinase receptor associated protein                              |
| STRN         | striatin, calmodulin binding protein                                             |
| STT3A        | STT3A, subunit of the oligosaccharyltransferase complex (catalytic)              |
| STT3B        | STT3B, subunit of the oligosaccharyltransferase complex (catalytic)              |
| STUB1        | STIP1 homology and U-box containing protein 1, E3 ubiquitin protein ligase       |
| STX10        | syntaxin 10                                                                      |
| STX11        | syntaxin 11                                                                      |
| STX16        | syntaxin 16                                                                      |
| STX16-NPEPL1 | STX16-NPEPL1 readthrough (NMD candidate)                                         |
| STX18        | syntaxin 18                                                                      |
| STX4         | syntaxin 4                                                                       |
| STX6         | syntaxin 6                                                                       |
| STX7         | syntaxin 7                                                                       |
| STXBP3       | syntaxin binding protein 3                                                       |
| STXBP4       | syntaxin binding protein 4                                                       |
| STXBP5       | syntaxin binding protein 5 (tomosyn)                                             |
| STYK1        | serine/threonine/tyrosine kinase 1                                               |
| STYX         | serine/threonine/tyrosine interacting protein                                    |

|         |                                                                      |
|---------|----------------------------------------------------------------------|
| STYXL1  | serine/threonine/tyrosine interacting-like 1                         |
| SUB1    | SUB1 homolog ( <i>S. cerevisiae</i> )                                |
| SUCLG2  | succinate-CoA ligase, GDP-forming, beta subunit                      |
| SUDS3   | suppressor of defective silencing 3 homolog ( <i>S. cerevisiae</i> ) |
| SUGCT   | succinyl-CoA:glutarate-CoA transferase                               |
| SUGP1   | SURP and G patch domain containing 1                                 |
| SUGP2   | SURP and G patch domain containing 2                                 |
| SUGT1   | SGT1, suppressor of G2 allele of SKP1 ( <i>S. cerevisiae</i> )       |
| SUGT1P3 | SUGT1 pseudogene 3                                                   |
| SUMF1   | sulfatase modifying factor 1                                         |
| SUMF2   | sulfatase modifying factor 2                                         |
| SUMO1   | small ubiquitin-like modifier 1                                      |
| SUMO2   | small ubiquitin-like modifier 2                                      |
| SUOX    | sulfite oxidase                                                      |
| SUPT16H | suppressor of Ty 16 homolog ( <i>S. cerevisiae</i> )                 |
| SUPT20H | suppressor of Ty 20 homolog ( <i>S. cerevisiae</i> )                 |
| SUPT4H1 | suppressor of Ty 4 homolog 1 ( <i>S. cerevisiae</i> )                |
| SUPT5H  | suppressor of Ty 5 homolog ( <i>S. cerevisiae</i> )                  |
| SUPT6H  | suppressor of Ty 6 homolog ( <i>S. cerevisiae</i> )                  |
| SUPT7L  | suppressor of Ty 7 ( <i>S. cerevisiae</i> )-like                     |
| SUPV3L1 | suppressor of var1, 3-like 1 ( <i>S. cerevisiae</i> )                |
| SURF6   | surfeit 6                                                            |
| SUSD3   | sushi domain containing 3                                            |
| SVIP    | small VCP/p97-interacting protein                                    |
| SWSAP1  | SWIM-type zinc finger 7 associated protein 1                         |
| SYCE2   | synaptonemal complex central element protein 2                       |
| SYCP2   | synaptonemal complex protein 2                                       |
| SYF2    | SYF2 pre-mRNA-splicing factor                                        |
| SYNCRIP | synaptotagmin binding, cytoplasmic RNA interacting protein           |
| SYNGAP1 | synaptic Ras GTPase activating protein 1                             |
| SYNGR2  | synaptogyrin 2                                                       |
| SYNRG   | synergyn, gamma                                                      |
| SYP     | synaptophysin                                                        |
| SYPL1   | synaptophysin-like 1                                                 |
| SYT5    | synaptotagmin V                                                      |
| SYTL1   | synaptotagmin-like 1                                                 |
| SYTL3   | synaptotagmin-like 3                                                 |
| SYVN1   | synovial apoptosis inhibitor 1, synoviolin                           |
| SZRD1   | SUZ RNA binding domain containing 1                                  |
| TAB1    | TGF-beta activated kinase 1/MAP3K7 binding protein 1                 |
| TAB2    | TGF-beta activated kinase 1/MAP3K7 binding protein 2                 |

|         |                                                                                                      |
|---------|------------------------------------------------------------------------------------------------------|
| TACC3   | transforming, acidic coiled-coil containing protein 3                                                |
| TACO1   | translational activator of mitochondrially encoded cytochrome c oxidase I                            |
| TACSTD2 | tumor-associated calcium signal transducer 2                                                         |
| TADA1   | transcriptional adaptor 1                                                                            |
| TADA2A  | transcriptional adaptor 2A                                                                           |
| TADA3   | transcriptional adaptor 3                                                                            |
| TAF10   | TAF10 RNA polymerase II, TATA box binding protein (TBP)-associated factor, 30kDa                     |
| TAF11   | TAF11 RNA polymerase II, TATA box binding protein (TBP)-associated factor, 28kDa                     |
| TAF12   | TAF12 RNA polymerase II, TATA box binding protein (TBP)-associated factor, 20kDa                     |
| TAF13   | TAF13 RNA polymerase II, TATA box binding protein (TBP)-associated factor, 18kDa                     |
| TAF15   | TAF15 RNA polymerase II, TATA box binding protein (TBP)-associated factor, 68kDa                     |
| TAF1D   | TATA box binding protein (TBP)-associated factor, RNA polymerase I, D, 41kDa                         |
| TAF2    | TAF2 RNA polymerase II, TATA box binding protein (TBP)-associated factor, 150kDa                     |
| TAF3    | TAF3 RNA polymerase II, TATA box binding protein (TBP)-associated factor, 140kDa                     |
| TAF5    | TAF5 RNA polymerase II, TATA box binding protein (TBP)-associated factor, 100kDa                     |
| TAF5L   | TAF5-like RNA polymerase II, p300/CBP-associated factor (PCAF)-associated factor, 65kDa              |
| TAF6    | TAF6 RNA polymerase II, TATA box binding protein (TBP)-associated factor, 80kDa                      |
| TAF6L   | TAF6-like RNA polymerase II, p300/CBP-associated factor (PCAF)-associated factor, 65kDa              |
| TAF7    | TAF7 RNA polymerase II, TATA box binding protein (TBP)-associated factor, 55kDa                      |
| TAF8    | TAF8 RNA polymerase II, TATA box binding protein (TBP)-associated factor, 43kDa                      |
| TAF9    | TAF9 RNA polymerase II, TATA box binding protein (TBP)-associated factor, 32kDa                      |
| TAGAP   | T-cell activation RhoGTPase activating protein                                                       |
| TAGLN2  | transgelin 2                                                                                         |
| TAMM41  | TAM41, mitochondrial translocator assembly and maintenance protein, homolog ( <i>S. cerevisiae</i> ) |
| TANGO6  | transport and golgi organization 6 homolog ( <i>Drosophila</i> )                                     |
| TANK    | TRAF family member-associated NFKB activator                                                         |
| TAOK1   | TAO kinase 1                                                                                         |
| TAOK2   | TAO kinase 2                                                                                         |
| TAPBPL  | TAP binding protein-like                                                                             |
| TARBP1  | TAR (HIV-1) RNA binding protein 1                                                                    |
| TARBP2  | TAR (HIV-1) RNA binding protein 2                                                                    |
| TARDBP  | TAR DNA binding protein                                                                              |
| TARS    | threonyl-tRNA synthetase                                                                             |
| TARS2   | threonyl-tRNA synthetase 2, mitochondrial (putative)                                                 |
| TARSL2  | threonyl-tRNA synthetase-like 2                                                                      |
| TAS1R1  | taste receptor, type 1, member 1                                                                     |
| TAS1R3  | taste receptor, type 1, member 3                                                                     |
| TATDN1  | TatD DNase domain containing 1                                                                       |
| TATDN3  | TatD DNase domain containing 3                                                                       |



|          |                                                                                          |
|----------|------------------------------------------------------------------------------------------|
| TAX1BP1  | Tax1 (human T-cell leukemia virus type I) binding protein 1                              |
| TAX1BP3  | Tax1 (human T-cell leukemia virus type I) binding protein 3                              |
| TBC1D1   | TBC1 (tre-2/USP6, BUB2, cdc16) domain family, member 1                                   |
| TBC1D10B | TBC1 domain family, member 10B                                                           |
| TBC1D13  | TBC1 domain family, member 13                                                            |
| TBC1D14  | TBC1 domain family, member 14                                                            |
| TBC1D15  | TBC1 domain family, member 15                                                            |
| TBC1D17  | TBC1 domain family, member 17                                                            |
| TBC1D19  | TBC1 domain family, member 19                                                            |
| TBC1D22A | TBC1 domain family, member 22A                                                           |
| TBC1D22B | TBC1 domain family, member 22B                                                           |
| TBC1D23  | TBC1 domain family, member 23                                                            |
| TBC1D25  | TBC1 domain family, member 25                                                            |
| TBC1D30  | TBC1 domain family, member 30                                                            |
| TBC1D32  | TBC1 domain family, member 32                                                            |
| TBC1D4   | TBC1 domain family, member 4                                                             |
| TBC1D5   | TBC1 domain family, member 5                                                             |
| TBCA     | tubulin folding cofactor A                                                               |
| TBCB     | tubulin folding cofactor B                                                               |
| TBCC     | tubulin folding cofactor C                                                               |
| TBCK     | TBC1 domain containing kinase                                                            |
| TBK1     | TANK-binding kinase 1                                                                    |
| TBL1X    | transducin (beta)-like 1X-linked                                                         |
| TBL3     | transducin (beta)-like 3                                                                 |
| TBPL1    | TBP-like 1                                                                               |
| TBRG4    | transforming growth factor beta regulator 4                                              |
| TBX6     | T-box 6                                                                                  |
| TCAF1    | TRPM8 channel-associated factor 1                                                        |
| TCAIM    | T cell activation inhibitor, mitochondrial                                               |
| TCAP     | titin-cap                                                                                |
| TCEA1    | transcription elongation factor A (SII), 1                                               |
| TCEA2    | transcription elongation factor A (SII), 2                                               |
| TCEB1    | transcription elongation factor B (SIII), polypeptide 1 (15kDa, elongin C)               |
| TCEB2    | transcription elongation factor B (SIII), polypeptide 2 (18kDa, elongin B)               |
| TCEB3    | transcription elongation factor B (SIII), polypeptide 3 (110kDa, elongin A)              |
| TCF12    | transcription factor 12                                                                  |
| TCF25    | transcription factor 25 (basic helix-loop-helix)                                         |
| TCF3     | transcription factor 3                                                                   |
| TCF7     | transcription factor 7 (T-cell specific, HMG-box)                                        |
| TCIRG1   | T-cell, immune regulator 1, ATPase, H <sup>+</sup> transporting, lysosomal V0 subunit A3 |
| TCL1A    | T-cell leukemia/lymphoma 1A                                                              |

|           |                                                                   |
|-----------|-------------------------------------------------------------------|
| TCP1      | t-complex 1                                                       |
| TCP10L    | t-complex 10-like                                                 |
| TCTA      | T-cell leukemia translocation altered                             |
| TCTE3     | t-complex-associated-testis-expressed 3                           |
| TCTEX1D2  | Tctex1 domain containing 2                                        |
| TCTEX1D4  | Tctex1 domain containing 4                                        |
| TCTN1     | tectonic family member 1                                          |
| TCTN3     | tectonic family member 3                                          |
| TDG       | thymine-DNA glycosylase                                           |
| TDP2      | tyrosyl-DNA phosphodiesterase 2                                   |
| TDRD3     | tudor domain containing 3                                         |
| TDRD7     | tudor domain containing 7                                         |
| TEC       | tec protein tyrosine kinase                                       |
| TECR      | trans-2,3-enoyl-CoA reductase                                     |
| TEFM      | transcription elongation factor, mitochondrial                    |
| TEN1      | TEN1 CST complex subunit                                          |
| TEN1-CDK3 | TEN1-CDK3 readthrough (NMD candidate)                             |
| TERC      | telomerase RNA component                                          |
| TERF2     | telomeric repeat binding factor 2                                 |
| TERF2IP   | telomeric repeat binding factor 2, interacting protein            |
| TES       | testin LIM domain protein                                         |
| TESK1     | testis-specific kinase 1                                          |
| TESPA1    | thymocyte expressed, positive selection associated 1              |
| TET2      | tet methylcytosine dioxygenase 2                                  |
| TEX10     | testis expressed 10                                               |
| TEX14     | testis expressed 14                                               |
| TEX2      | testis expressed 2                                                |
| TEX264    | testis expressed 264                                              |
| TFAM      | transcription factor A, mitochondrial                             |
| TFAP4     | transcription factor AP-4 (activating enhancer binding protein 4) |
| TFB1M     | transcription factor B1, mitochondrial                            |
| TFB2M     | transcription factor B2, mitochondrial                            |
| TFCP2     | transcription factor CP2                                          |
| TFDP1     | transcription factor Dp-1                                         |
| TFEB      | transcription factor EB                                           |
| TFG       | TRK-fused gene                                                    |
| TFPT      | TCF3 (E2A) fusion partner (in childhood Leukemia)                 |
| TFRC      | transferrin receptor                                              |
| TGDS      | TDP-glucose 4,6-dehydratase                                       |
| TGFB1     | transforming growth factor, beta 1                                |
| TGIF2     | TGFB-induced factor homeobox 2                                    |

|                |                                                                    |
|----------------|--------------------------------------------------------------------|
| TGIF2-C20ORF24 | TGIF2-C20orf24 readthrough                                         |
| TGOLN2         | trans-golgi network protein 2                                      |
| TGS1           | trimethylguanosine synthase 1                                      |
| THADA          | thyroid adenoma associated                                         |
| THAP1          | THAP domain containing, apoptosis associated protein 1             |
| THAP2          | THAP domain containing, apoptosis associated protein 2             |
| THAP3          | THAP domain containing, apoptosis associated protein 3             |
| THAP5          | THAP domain containing 5                                           |
| THAP6          | THAP domain containing 6                                           |
| THAP7          | THAP domain containing 7                                           |
| THAP7-AS1      | THAP7 antisense RNA 1                                              |
| THAP8          | THAP domain containing 8                                           |
| THAP9          | THAP domain containing 9                                           |
| THEM4          | thioesterase superfamily member 4                                  |
| THG1L          | tRNA-histidine guanylyltransferase 1-like ( <i>S. cerevisiae</i> ) |
| THNSL1         | threonine synthase-like 1 ( <i>S. cerevisiae</i> )                 |
| THOC1          | THO complex 1                                                      |
| THOC2          | THO complex 2                                                      |
| THOC5          | THO complex 5                                                      |
| THOC7          | THO complex 7                                                      |
| THOP1          | thimet oligopeptidase 1                                            |
| THRA           | thyroid hormone receptor, alpha                                    |
| THRAP3         | thyroid hormone receptor associated protein 3                      |
| THSD1P1        | thrombospondin, type I, domain containing 1 pseudogene 1           |
| THUMPD1        | THUMP domain containing 1                                          |
| THUMPD2        | THUMP domain containing 2                                          |
| THUMPD3        | THUMP domain containing 3                                          |
| TIA1           | TIA1 cytotoxic granule-associated RNA binding protein              |
| TIAL1          | TIA1 cytotoxic granule-associated RNA binding protein-like 1       |
| TICAM1         | toll-like receptor adaptor molecule 1                              |
| TICAM2         | toll-like receptor adaptor molecule 2                              |
| TIFA           | TRAF-interacting protein with forkhead-associated domain           |
| TIGAR          | TP53 induced glycolysis regulatory phosphatase                     |
| TIGD1          | tigger transposable element derived 1                              |
| TIGD3          | tigger transposable element derived 3                              |
| TIGD4          | tigger transposable element derived 4                              |
| TIGD5          | tigger transposable element derived 5                              |
| TIGD6          | tigger transposable element derived 6                              |
| TIMELESS       | timeless circadian clock                                           |
| TIMM10         | translocase of inner mitochondrial membrane 10 homolog (yeast)     |
| TIMM10B        | translocase of inner mitochondrial membrane 10 homolog B (yeast)   |

|            |                                                                                 |
|------------|---------------------------------------------------------------------------------|
| TIMM13     | translocase of inner mitochondrial membrane 13 homolog (yeast)                  |
| TIMM17A    | translocase of inner mitochondrial membrane 17 homolog A (yeast)                |
| TIMM17B    | translocase of inner mitochondrial membrane 17 homolog B (yeast)                |
| TIMM21     | translocase of inner mitochondrial membrane 21 homolog (yeast)                  |
| TIMM22     | translocase of inner mitochondrial membrane 22 homolog (yeast)                  |
| TIMM44     | translocase of inner mitochondrial membrane 44 homolog (yeast)                  |
| TIMM50     | translocase of inner mitochondrial membrane 50 homolog ( <i>S. cerevisiae</i> ) |
| TIMM8A     | translocase of inner mitochondrial membrane 8 homolog A (yeast)                 |
| TIMM8B     | translocase of inner mitochondrial membrane 8 homolog B (yeast)                 |
| TIMM9      | translocase of inner mitochondrial membrane 9 homolog (yeast)                   |
| TIMMDC1    | translocase of inner mitochondrial membrane domain containing 1                 |
| TIMP1      | TIMP metalloproteinase inhibitor 1                                              |
| TINF2      | TERF1 (TRF1)-interacting nuclear factor 2                                       |
| TIPARP     | TCDD-inducible poly(ADP-ribose) polymerase                                      |
| TIPARP-AS1 | TIPARP antisense RNA 1                                                          |
| TIPIN      | TIMELESS interacting protein                                                    |
| TK1        | thymidine kinase 1, soluble                                                     |
| TLCD1      | TLC domain containing 1                                                         |
| TLDC1      | TBC/LysM-associated domain containing 1                                         |
| TLE3       | transducin-like enhancer of split 3                                             |
| TLE4       | transducin-like enhancer of split 4                                             |
| TLL2       | tolloid-like 2                                                                  |
| TLN1       | talin 1                                                                         |
| TLR1       | toll-like receptor 1                                                            |
| TLR10      | toll-like receptor 10                                                           |
| TLR6       | toll-like receptor 6                                                            |
| TLR9       | toll-like receptor 9                                                            |
| TM2D1      | TM2 domain containing 1                                                         |
| TM2D3      | TM2 domain containing 3                                                         |
| TM7SF2     | transmembrane 7 superfamily member 2                                            |
| TM7SF3     | transmembrane 7 superfamily member 3                                            |
| TM9SF1     | transmembrane 9 superfamily member 1                                            |
| TM9SF2     | transmembrane 9 superfamily member 2                                            |
| TM9SF4     | transmembrane 9 superfamily protein member 4                                    |
| TMA16      | translation machinery associated 16 homolog ( <i>S. cerevisiae</i> )            |
| TMA7       | translation machinery associated 7 homolog ( <i>S. cerevisiae</i> )             |
| TMBIM1     | transmembrane BAX inhibitor motif containing 1                                  |
| TMBIM4     | transmembrane BAX inhibitor motif containing 4                                  |
| TMBIM6     | transmembrane BAX inhibitor motif containing 6                                  |
| TMC6       | transmembrane channel-like 6                                                    |
| TMC8       | transmembrane channel-like 8                                                    |

|                 |                                                                  |
|-----------------|------------------------------------------------------------------|
| <b>TMCO1</b>    | <b>transmembrane and coiled-coil domains 1</b>                   |
| <b>TMCO3</b>    | <b>transmembrane and coiled-coil domains 3</b>                   |
| <b>TMCO6</b>    | <b>transmembrane and coiled-coil domains 6</b>                   |
| <b>TMED1</b>    | <b>transmembrane emp24 protein transport domain containing 1</b> |
| <b>TMED2</b>    | <b>transmembrane emp24 domain trafficking protein 2</b>          |
| <b>TMED4</b>    | <b>transmembrane emp24 protein transport domain containing 4</b> |
| <b>TMED5</b>    | <b>transmembrane emp24 protein transport domain containing 5</b> |
| <b>TMED9</b>    | <b>transmembrane emp24 protein transport domain containing 9</b> |
| <b>TMEM101</b>  | <b>transmembrane protein 101</b>                                 |
| <b>TMEM106A</b> | <b>transmembrane protein 106A</b>                                |
| <b>TMEM109</b>  | <b>transmembrane protein 109</b>                                 |
| <b>TMEM115</b>  | <b>transmembrane protein 115</b>                                 |
| <b>TMEM116</b>  | <b>transmembrane protein 116</b>                                 |
| <b>TMEM117</b>  | <b>transmembrane protein 117</b>                                 |
| <b>TMEM120B</b> | <b>transmembrane protein 120B</b>                                |
| <b>TMEM123</b>  | <b>transmembrane protein 123</b>                                 |
| <b>TMEM126A</b> | <b>transmembrane protein 126A</b>                                |
| <b>TMEM126B</b> | <b>transmembrane protein 126B</b>                                |
| <b>TMEM127</b>  | <b>transmembrane protein 127</b>                                 |
| <b>TMEM128</b>  | <b>transmembrane protein 128</b>                                 |
| <b>TMEM129</b>  | <b>transmembrane protein 129, E3 ubiquitin protein ligase</b>    |
| <b>TMEM131</b>  | <b>transmembrane protein 131</b>                                 |
| <b>TMEM132A</b> | <b>transmembrane protein 132A</b>                                |
| <b>TMEM134</b>  | <b>transmembrane protein 134</b>                                 |
| <b>TMEM135</b>  | <b>transmembrane protein 135</b>                                 |
| <b>TMEM138</b>  | <b>transmembrane protein 138</b>                                 |
| <b>TMEM141</b>  | <b>transmembrane protein 141</b>                                 |
| <b>TMEM147</b>  | <b>transmembrane protein 147</b>                                 |
| <b>TMEM14B</b>  | <b>transmembrane protein 14B</b>                                 |
| <b>TMEM14C</b>  | <b>transmembrane protein 14C</b>                                 |
| <b>TMEM150A</b> | <b>transmembrane protein 150A</b>                                |
| <b>TMEM154</b>  | <b>transmembrane protein 154</b>                                 |
| <b>TMEM156</b>  | <b>transmembrane protein 156</b>                                 |
| <b>TMEM167A</b> | <b>transmembrane protein 167A</b>                                |
| <b>TMEM167B</b> | <b>transmembrane protein 167B</b>                                |
| <b>TMEM168</b>  | <b>transmembrane protein 168</b>                                 |
| <b>TMEM17</b>   | <b>transmembrane protein 17</b>                                  |
| <b>TMEM170A</b> | <b>transmembrane protein 170A</b>                                |
| <b>TMEM173</b>  | <b>transmembrane protein 173</b>                                 |
| <b>TMEM175</b>  | <b>transmembrane protein 175</b>                                 |
| <b>TMEM179B</b> | <b>transmembrane protein 179B</b>                                |

|                |                                          |
|----------------|------------------------------------------|
| TMEM18         | transmembrane protein 18                 |
| TMEM183A       | transmembrane protein 183A               |
| TMEM183B       | transmembrane protein 183B               |
| TMEM184C       | transmembrane protein 184C               |
| TMEM185B       | transmembrane protein 185B               |
| TMEM187        | transmembrane protein 187                |
| TMEM189        | transmembrane protein 189                |
| TMEM189-UBE2V1 | TMEM189-UBE2V1 readthrough               |
| TMEM19         | transmembrane protein 19                 |
| TMEM194B       | transmembrane protein 194B               |
| TMEM198B       | transmembrane protein 198B, pseudogene   |
| TMEM203        | transmembrane protein 203                |
| TMEM206        | transmembrane protein 206                |
| TMEM208        | transmembrane protein 208                |
| TMEM209        | transmembrane protein 209                |
| TMEM217        | transmembrane protein 217                |
| TMEM222        | transmembrane protein 222                |
| TMEM223        | transmembrane protein 223                |
| TMEM230        | transmembrane protein 230                |
| TMEM237        | transmembrane protein 237                |
| TMEM238        | transmembrane protein 238                |
| TMEM242        | transmembrane protein 242                |
| TMEM243        | transmembrane protein 243, mitochondrial |
| TMEM248        | transmembrane protein 248                |
| TMEM255A       | transmembrane protein 255A               |
| TMEM258        | transmembrane protein 258                |
| TMEM259        | transmembrane protein 259                |
| TMEM260        | transmembrane protein 260                |
| TMEM30A        | transmembrane protein 30A                |
| TMEM33         | transmembrane protein 33                 |
| TMEM38A        | transmembrane protein 38A                |
| TMEM39A        | transmembrane protein 39A                |
| TMEM39B        | transmembrane protein 39B                |
| TMEM41A        | transmembrane protein 41A                |
| TMEM41B        | transmembrane protein 41B                |
| TMEM42         | transmembrane protein 42                 |
| TMEM43         | transmembrane protein 43                 |
| TMEM44         | transmembrane protein 44                 |
| TMEM5          | transmembrane protein 5                  |
| TMEM60         | transmembrane protein 60                 |
| TMEM62         | transmembrane protein 62                 |

|                 |                                                              |
|-----------------|--------------------------------------------------------------|
| TMEM63B         | transmembrane protein 63B                                    |
| TMEM64          | transmembrane protein 64                                     |
| TMEM68          | transmembrane protein 68                                     |
| TMEM69          | transmembrane protein 69                                     |
| TMEM79          | transmembrane protein 79                                     |
| TMEM80          | transmembrane protein 80                                     |
| TMEM87A         | transmembrane protein 87A                                    |
| TMEM87B         | transmembrane protein 87B                                    |
| TMEM88          | transmembrane protein 88                                     |
| TMEM91          | transmembrane protein 91                                     |
| TMEM9B          | TMEM9 domain family, member B                                |
| TMF1            | TATA element modulatory factor 1                             |
| TMPO            | thymopoietin                                                 |
| TMPPE           | transmembrane protein with metallophosphoesterase domain     |
| TMSB10          | thymosin beta 10                                             |
| TMSB15B         | thymosin beta 15B                                            |
| TMSB4X          | thymosin beta 4, X-linked                                    |
| TMUB2           | transmembrane and ubiquitin-like domain containing 2         |
| TMX2            | thioredoxin-related transmembrane protein 2                  |
| TMX2-CTNND1     | TMX2-CTNND1 readthrough (NMD candidate)                      |
| TMX3            | thioredoxin-related transmembrane protein 3                  |
| TNFAIP3         | tumor necrosis factor, alpha-induced protein 3               |
| TNFAIP8         | tumor necrosis factor, alpha-induced protein 8               |
| TNFAIP8L1       | tumor necrosis factor, alpha-induced protein 8-like 1        |
| TNFAIP8L2       | tumor necrosis factor, alpha-induced protein 8-like 2        |
| TNFAIP8L2-SCNM1 | TNFAIP8L2-SCNM1 readthrough                                  |
| TNFRSF10A       | tumor necrosis factor receptor superfamily, member 10a       |
| TNFRSF10B       | tumor necrosis factor receptor superfamily, member 10b       |
| TNFRSF13B       | tumor necrosis factor receptor superfamily, member 13B       |
| TNFRSF13C       | tumor necrosis factor receptor superfamily, member 13C       |
| TNFRSF14        | tumor necrosis factor receptor superfamily, member 14        |
| TNFRSF17        | tumor necrosis factor receptor superfamily, member 17        |
| TNFRSF19        | tumor necrosis factor receptor superfamily, member 19        |
| TNFRSF1B        | tumor necrosis factor receptor superfamily, member 1B        |
| TNFRSF4         | tumor necrosis factor receptor superfamily, member 4         |
| TNFRSF6B        | tumor necrosis factor receptor superfamily, member 6b, decoy |
| TNFRSF8         | tumor necrosis factor receptor superfamily, member 8         |
| TNFSF13B        | tumor necrosis factor (ligand) superfamily, member 13b       |
| TNFSF14         | tumor necrosis factor (ligand) superfamily, member 14        |
| TNFSF4          | tumor necrosis factor (ligand) superfamily, member 4         |
| TNFSF9          | tumor necrosis factor (ligand) superfamily, member 9         |

|          |                                                                                   |
|----------|-----------------------------------------------------------------------------------|
| TNIK     | TRAF2 and NCK interacting kinase                                                  |
| TNIP1    | TNFAIP3 interacting protein 1                                                     |
| TNIP3    | TNFAIP3 interacting protein 3                                                     |
| TNK2     | tyrosine kinase, non-receptor, 2                                                  |
| TNKS1BP1 | tankyrase 1 binding protein 1, 182kDa                                             |
| TNPO1    | transportin 1                                                                     |
| TNPO2    | transportin 2                                                                     |
| TNPO3    | transportin 3                                                                     |
| TNRC6B   | trinucleotide repeat containing 6B                                                |
| TOB1     | transducer of ERBB2, 1                                                            |
| TOB2     | transducer of ERBB2, 2                                                            |
| TOE1     | target of EGR1, member 1 (nuclear)                                                |
| TOM1     | target of myb1 (chicken)                                                          |
| TOMM20   | translocase of outer mitochondrial membrane 20 homolog (yeast)                    |
| TOMM20L  | translocase of outer mitochondrial membrane 20 homolog (yeast)-like               |
| TOMM22   | translocase of outer mitochondrial membrane 22 homolog (yeast)                    |
| TOMM40   | translocase of outer mitochondrial membrane 40 homolog (yeast)                    |
| TOMM5    | translocase of outer mitochondrial membrane 5 homolog (yeast)                     |
| TOMM6    | translocase of outer mitochondrial membrane 6 homolog (yeast)                     |
| TOMM7    | translocase of outer mitochondrial membrane 7 homolog (yeast)                     |
| TOMM70A  | translocase of outer mitochondrial membrane 70 homolog A ( <i>S. cerevisiae</i> ) |
| TOP2B    | topoisomerase (DNA) II beta 180kDa                                                |
| TOP3A    | topoisomerase (DNA) III alpha                                                     |
| TOP3B    | topoisomerase (DNA) III beta                                                      |
| TOPBP1   | topoisomerase (DNA) II binding protein 1                                          |
| TOPORS   | topoisomerase I binding, arginine/serine-rich, E3 ubiquitin protein ligase        |
| TOR1A    | torsin family 1, member A (torsin A)                                              |
| TOR1AIP1 | torsin A interacting protein 1                                                    |
| TOR2A    | torsin family 2, member A                                                         |
| TOR3A    | torsin family 3, member A                                                         |
| TOR4A    | torsin family 4, member A                                                         |
| TP53     | tumor protein p53                                                                 |
| TP53I13  | tumor protein p53 inducible protein 13                                            |
| TP53I3   | tumor protein p53 inducible protein 3                                             |
| TPCN1    | two pore segment channel 1                                                        |
| TPD52    | tumor protein D52                                                                 |
| TPD52L2  | tumor protein D52-like 2                                                          |
| TPGS1    | tubulin polyglutamylase complex subunit 1                                         |
| TPI1     | triosephosphate isomerase 1                                                       |
| TPI1P2   | triosephosphate isomerase 1 pseudogene 2                                          |
| TPK1     | thiamin pyrophosphokinase 1                                                       |



|              |                                                               |
|--------------|---------------------------------------------------------------|
| TPM4         | tropomyosin 4                                                 |
| TPMT         | thiopurine S-methyltransferase                                |
| TPP1         | tripeptidyl peptidase I                                       |
| TPR          | translocated promoter region, nuclear basket protein          |
| TPRA1        | transmembrane protein, adipocyte associated 1                 |
| TPRKB        | TP53RK binding protein                                        |
| TPRN         | taperin                                                       |
| TPT1         | tumor protein, translationally-controlled 1                   |
| TPX2         | TPX2, microtubule-associated                                  |
| TRA2A        | transformer 2 alpha homolog (Drosophila)                      |
| TRA2B        | transformer 2 beta homolog (Drosophila)                       |
| TRADD        | TNFRSF1A-associated via death domain                          |
| TRAF1        | TNF receptor-associated factor 1                              |
| TRAF2        | TNF receptor-associated factor 2                              |
| TRAF3        | TNF receptor-associated factor 3                              |
| TRAF3IP2     | TRAF3 interacting protein 2                                   |
| TRAF3IP2-AS1 | TRAF3IP2 antisense RNA 1                                      |
| TRAF4        | TNF receptor-associated factor 4                              |
| TRAF6        | TNF receptor-associated factor 6, E3 ubiquitin protein ligase |
| TRAF7        | TNF receptor-associated factor 7, E3 ubiquitin protein ligase |
| TRAK2        | trafficking protein, kinesin binding 2                        |
| TRAM1        | translocation associated membrane protein 1                   |
| TRAPPC12     | trafficking protein particle complex 12                       |
| TRAPPC13     | trafficking protein particle complex 13                       |
| TRAPPC2      | trafficking protein particle complex 2                        |
| TRAPPC2P1    |                                                               |
| TRAPPC3      | trafficking protein particle complex 3                        |
| TRAPPC4      | trafficking protein particle complex 4                        |
| TRAPPC5      | trafficking protein particle complex 5                        |
| TRAPPC6B     | trafficking protein particle complex 6B                       |
| TRAPPC8      | trafficking protein particle complex 8                        |
| TRERF1       | transcriptional regulating factor 1                           |
| TREX1        | three prime repair exonuclease 1                              |
| TRIAP1       | TP53 regulated inhibitor of apoptosis 1                       |
| TRIB1        | tribbles pseudokinase 1                                       |
| TRIM13       | tripartite motif containing 13                                |
| TRIM14       | tripartite motif containing 14                                |
| TRIM23       | tripartite motif containing 23                                |
| TRIM25       | tripartite motif containing 25                                |
| TRIM28       | tripartite motif containing 28                                |
| TRIM33       | tripartite motif containing 33                                |

|          |                                                                                       |
|----------|---------------------------------------------------------------------------------------|
| TRIM35   | tripartite motif containing 35                                                        |
| TRIM37   | tripartite motif containing 37                                                        |
| TRIM38   | tripartite motif containing 38                                                        |
| TRIM4    | tripartite motif containing 4                                                         |
| TRIM41   | tripartite motif containing 41                                                        |
| TRIM46   | tripartite motif containing 46                                                        |
| TRIM5    | tripartite motif containing 5                                                         |
| TRIM52   | tripartite motif containing 52                                                        |
| TRIM59   | tripartite motif containing 59                                                        |
| TRIM61   | tripartite motif containing 61                                                        |
| TRIM65   | tripartite motif containing 65                                                        |
| TRIM7    | tripartite motif containing 7                                                         |
| TRIM8    | tripartite motif containing 8                                                         |
| TRIO     | trio Rho guanine nucleotide exchange factor                                           |
| TRIP11   | thyroid hormone receptor interactor 11                                                |
| TRIP12   | thyroid hormone receptor interactor 12                                                |
| TRIP4    | thyroid hormone receptor interactor 4                                                 |
| TRIP6    | thyroid hormone receptor interactor 6                                                 |
| TRIQK    | triple QxxK/R motif containing                                                        |
| TRMT1    | tRNA methyltransferase 1 homolog ( <i>S. cerevisiae</i> )                             |
| TRMT10A  | tRNA methyltransferase 10 homolog A ( <i>S. cerevisiae</i> )                          |
| TRMT10C  | tRNA methyltransferase 10 homolog C ( <i>S. cerevisiae</i> )                          |
| TRMT11   | tRNA methyltransferase 11 homolog ( <i>S. cerevisiae</i> )                            |
| TRMT112  | tRNA methyltransferase 11-2 homolog ( <i>S. cerevisiae</i> )                          |
| TRMT2A   | tRNA methyltransferase 2 homolog A ( <i>S. cerevisiae</i> )                           |
| TRMT44   | tRNA methyltransferase 44 homolog ( <i>S. cerevisiae</i> )                            |
| TRMT5    | tRNA methyltransferase 5                                                              |
| TRMT6    | tRNA methyltransferase 6                                                              |
| TRMT61A  | tRNA methyltransferase 61A                                                            |
| TRMT61B  | tRNA methyltransferase 61B                                                            |
| TRNAU1AP | tRNA selenocysteine 1 associated protein 1                                            |
| TRNT1    | tRNA nucleotidyl transferase, CCA-adding, 1                                           |
| TROAP    | trophinin associated protein                                                          |
| TROVE2   | TROVE domain family, member 2                                                         |
| TRPC4AP  | transient receptor potential cation channel, subfamily C, member 4 associated protein |
| TRPM7    | transient receptor potential cation channel, subfamily M, member 7                    |
| TRPT1    | tRNA phosphotransferase 1                                                             |
| TRPV2    | transient receptor potential cation channel, subfamily V, member 2                    |
| TRPV3    | transient receptor potential cation channel, subfamily V, member 3                    |
| TRRAP    | transformation/transcription domain-associated protein                                |
| TRUB2    | TruB pseudouridine ( $\psi$ ) synthase family member 2                                |

|             |                                                                    |
|-------------|--------------------------------------------------------------------|
| TSACC       | TSSK6 activating co-chaperone                                      |
| TSC22D1     | TSC22 domain family, member 1                                      |
| TSC22D2     | TSC22 domain family, member 2                                      |
| TSC22D4     | TSC22 domain family, member 4                                      |
| TSEN15      | TSEN15 tRNA splicing endonuclease subunit                          |
| TSEN2       | TSEN2 tRNA splicing endonuclease subunit                           |
| TSEN34      | TSEN34 tRNA splicing endonuclease subunit                          |
| TSFM        | Ts translation elongation factor, mitochondrial                    |
| TSG101      | tumor susceptibility 101                                           |
| TSGA10      | testis specific, 10                                                |
| TSN         | translin                                                           |
| TSNAX       | translin-associated factor X                                       |
| TSNAX-DISC1 | TSNAX-DISC1 readthrough (NMD candidate)                            |
| TSPAN17     | tetraspanin 17                                                     |
| TSPAN31     | tetraspanin 31                                                     |
| TSPAN4      | tetraspanin 4                                                      |
| TSPY26P     | testis specific protein, Y-linked 26, pseudogene                   |
| TSPYL1      | TSPY-like 1                                                        |
| TSPYL2      | TSPY-like 2                                                        |
| TSPYL4      | TSPY-like 4                                                        |
| TSR1        | TSR1, 20S rRNA accumulation, homolog ( <i>S. cerevisiae</i> )      |
| TSR2        | TSR2, 20S rRNA accumulation, homolog ( <i>S. cerevisiae</i> )      |
| TSSC1       | tumor suppressing subtransferable candidate 1                      |
| TSSC4       | tumor suppressing subtransferable candidate 4                      |
| TSSK3       | testis-specific serine kinase 3                                    |
| TSSK6       | testis-specific serine kinase 6                                    |
| TSTA3       | tissue specific transplantation antigen P35B                       |
| TSTD1       | thiosulfate sulfurtransferase (rhodanese)-like domain containing 1 |
| TSTD2       | thiosulfate sulfurtransferase (rhodanese)-like domain containing 2 |
| TTC1        | tetratricopeptide repeat domain 1                                  |
| TTC14       | tetratricopeptide repeat domain 14                                 |
| TTC17       | tetratricopeptide repeat domain 17                                 |
| TTC19       | tetratricopeptide repeat domain 19                                 |
| TTC21A      | tetratricopeptide repeat domain 21A                                |
| TTC21B      | tetratricopeptide repeat domain 21B                                |
| TTC23       | tetratricopeptide repeat domain 23                                 |
| TTC26       | tetratricopeptide repeat domain 26                                 |
| TTC27       | tetratricopeptide repeat domain 27                                 |
| TTC28-AS1   | TTC28 antisense RNA 1                                              |
| TTC30B      | tetratricopeptide repeat domain 30B                                |
| TTC31       | tetratricopeptide repeat domain 31                                 |

|         |                                                                           |
|---------|---------------------------------------------------------------------------|
| TTC32   | tetratricopeptide repeat domain 32                                        |
| TTC33   | tetratricopeptide repeat domain 33                                        |
| TTC37   | tetratricopeptide repeat domain 37                                        |
| TTC39C  | tetratricopeptide repeat domain 39C                                       |
| TTC4    | tetratricopeptide repeat domain 4                                         |
| TTC41P  | tetratricopeptide repeat domain 41, pseudogene                            |
| TTC7A   | tetratricopeptide repeat domain 7A                                        |
| TTC9    | tetratricopeptide repeat domain 9                                         |
| TTC9C   | tetratricopeptide repeat domain 9C                                        |
| TTF2    | transcription termination factor, RNA polymerase II                       |
| TTI1    | TELO2 interacting protein 1                                               |
| TTI2    | TELO2 interacting protein 2                                               |
| TTK     | TTK protein kinase                                                        |
| TLL12   | tubulin tyrosine ligase-like family member 12                             |
| TLL3    | tubulin tyrosine ligase-like family member 3                              |
| TLL5    | tubulin tyrosine ligase-like family member 5                              |
| TTPAL   | tocopherol (alpha) transfer protein-like                                  |
| TTYH1   | tweety family member 1                                                    |
| TTYH2   | tweety family member 2                                                    |
| TTYH3   | tweety family member 3                                                    |
| TUBA1A  | tubulin, alpha 1a                                                         |
| TUBA1B  | tubulin, alpha 1b                                                         |
| TUBA1C  | tubulin, alpha 1c                                                         |
| TUBB4B  | tubulin, beta 4B class IVb                                                |
| TUBD1   | tubulin, delta 1                                                          |
| TUBG1   | tubulin, gamma 1                                                          |
| TUBGCP2 | tubulin, gamma complex associated protein 2                               |
| TUBGCP3 | tubulin, gamma complex associated protein 3                               |
| TUBGCP6 | tubulin, gamma complex associated protein 6                               |
| TUFM    | Tu translation elongation factor, mitochondrial                           |
| TULP3   | tubby like protein 3                                                      |
| TUSC2   | tumor suppressor candidate 2                                              |
| TUT1    | terminal uridylyl transferase 1, U6 snRNA-specific                        |
| TVP23B  | trans-golgi network vesicle protein 23 homolog B ( <i>S. cerevisiae</i> ) |
| TWF2    | twinfilin actin binding protein 2                                         |
| TWISTNB | TWIST neighbor                                                            |
| TXLNA   | taxilin alpha                                                             |
| TXLNB   | taxilin beta                                                              |
| TXN     | thioredoxin                                                               |
| TXN2    | thioredoxin 2                                                             |
| TXNDC11 | thioredoxin domain containing 11                                          |

|           |                                                                 |
|-----------|-----------------------------------------------------------------|
| TXNDC12   | thioredoxin domain containing 12 (endoplasmic reticulum)        |
| TXNDC15   | thioredoxin domain containing 15                                |
| TXNDC17   | thioredoxin domain containing 17                                |
| TXNDC9    | thioredoxin domain containing 9                                 |
| TXNIP     | thioredoxin interacting protein                                 |
| TXNL1     | thioredoxin-like 1                                              |
| TYK2      | tyrosine kinase 2                                               |
| TYMP      | thymidine phosphorylase                                         |
| TYMS      | thymidylate synthetase                                          |
| TYMSOS    | TYMS opposite strand                                            |
| TYSND1    | trypsin domain containing 1                                     |
| TYW1      | tRNA-yW synthesizing protein 1 homolog ( <i>S. cerevisiae</i> ) |
| TYW3      | tRNA-yW synthesizing protein 3 homolog ( <i>S. cerevisiae</i> ) |
| TYW5      | tRNA-yW synthesizing protein 5                                  |
| U2AF2     | U2 small nuclear RNA auxiliary factor 2                         |
| U2SURP    | U2 snRNP-associated SURP domain containing                      |
| UBA1      | ubiquitin-like modifier activating enzyme 1                     |
| UBA52     | ubiquitin A-52 residue ribosomal protein fusion product 1       |
| UBA6      | ubiquitin-like modifier activating enzyme 6                     |
| UBAC2     | UBA domain containing 2                                         |
| UBAC2-AS1 | UBAC2 antisense RNA 1                                           |
| UBALD1    | UBA-like domain containing 1                                    |
| UBALD2    | UBA-like domain containing 2                                    |
| UBAP1     | ubiquitin associated protein 1                                  |
| UBAP2     | ubiquitin associated protein 2                                  |
| UBAP2L    | ubiquitin associated protein 2-like                             |
| UBB       | ubiquitin B                                                     |
| UBC       | ubiquitin C                                                     |
| UBE2A     | ubiquitin-conjugating enzyme E2A                                |
| UBE2B     | ubiquitin-conjugating enzyme E2B                                |
| UBE2C     | ubiquitin-conjugating enzyme E2C                                |
| UBE2D2    | ubiquitin-conjugating enzyme E2D 2                              |
| UBE2D3    | ubiquitin-conjugating enzyme E2D 3                              |
| UBE2D4    | ubiquitin-conjugating enzyme E2D 4 (putative)                   |
| UBE2G1    | ubiquitin-conjugating enzyme E2G 1                              |
| UBE2G2    | ubiquitin-conjugating enzyme E2G 2                              |
| UBE2I     | ubiquitin-conjugating enzyme E2I                                |
| UBE2K     | ubiquitin-conjugating enzyme E2K                                |
| UBE2L3    | ubiquitin-conjugating enzyme E2L 3                              |
| UBE2M     | ubiquitin-conjugating enzyme E2M                                |
| UBE2N     | ubiquitin-conjugating enzyme E2N                                |

|         |                                                                   |
|---------|-------------------------------------------------------------------|
| UBE2Q1  | ubiquitin-conjugating enzyme E2Q family member 1                  |
| UBE2QL1 | ubiquitin-conjugating enzyme E2Q family-like 1                    |
| UBE2R2  | ubiquitin-conjugating enzyme E2R 2                                |
| UBE2S   | ubiquitin-conjugating enzyme E2S                                  |
| UBE2V2  | ubiquitin-conjugating enzyme E2 variant 2                         |
| UBE2Z   | ubiquitin-conjugating enzyme E2Z                                  |
| UBE3D   | ubiquitin protein ligase E3D                                      |
| UBE4A   | ubiquitination factor E4A                                         |
| UBFD1   | ubiquitin family domain containing 1                              |
| UBL5    | ubiquitin-like 5                                                  |
| UBL7    | ubiquitin-like 7                                                  |
| UBLCP1  | ubiquitin-like domain containing CTD phosphatase 1                |
| UBOX5   | U-box domain containing 5                                         |
| UBP1    | upstream binding protein 1 (LBP-1a)                               |
| UBQLN1  | ubiquilin 1                                                       |
| UBQLN4  | ubiquilin 4                                                       |
| UBR1    | ubiquitin protein ligase E3 component n-recognin 1                |
| UBR2    | ubiquitin protein ligase E3 component n-recognin 2                |
| UBR4    | ubiquitin protein ligase E3 component n-recognin 4                |
| UBR5    | ubiquitin protein ligase E3 component n-recognin 5                |
| UBTD1   | ubiquitin domain containing 1                                     |
| UBTF    | upstream binding transcription factor, RNA polymerase I           |
| UBXN1   | UBX domain protein 1                                              |
| UBXN2A  | UBX domain protein 2A                                             |
| UBXN2B  | UBX domain protein 2B                                             |
| UBXN4   | UBX domain protein 4                                              |
| UBXN7   | UBX domain protein 7                                              |
| UBXN8   | UBX domain protein 8                                              |
| UCHL3   | ubiquitin carboxyl-terminal esterase L3 (ubiquitin thiolesterase) |
| UCHL5   | ubiquitin carboxyl-terminal hydrolase L5                          |
| UCKL1   | uridine-cytidine kinase 1-like 1                                  |
| UCP2    | uncoupling protein 2 (mitochondrial, proton carrier)              |
| UEVLD   | UEV and lactate/malate dehydrogenase domains                      |
| UFC1    | ubiquitin-fold modifier conjugating enzyme 1                      |
| UFL1    | UFM1-specific ligase 1                                            |
| UFSP1   | UFM1-specific peptidase 1 (non-functional)                        |
| UFSP2   | UFM1-specific peptidase 2                                         |
| UGCG    | UDP-glucose ceramide glucosyltransferase                          |
| UGDH    | UDP-glucose 6-dehydrogenase                                       |
| UGGT1   | UDP-glucose glycoprotein glucosyltransferase 1                    |
| UGP2    | UDP-glucose pyrophosphorylase 2                                   |

|           |                                                                                |
|-----------|--------------------------------------------------------------------------------|
| UHRF1BP1  | UHRF1 binding protein 1                                                        |
| UHRF1BP1L | UHRF1 binding protein 1-like                                                   |
| UHRF2     | ubiquitin-like with PHD and ring finger domains 2, E3 ubiquitin protein ligase |
| UIMC1     | ubiquitin interaction motif containing 1                                       |
| ULK3      | unc-51 like kinase 3                                                           |
| ULK4      | unc-51 like kinase 4                                                           |
| UMODL1    | uromodulin-like 1                                                              |
| UMPS      | uridine monophosphate synthetase                                               |
| UNC45A    | unc-45 homolog A ( <i>C. elegans</i> )                                         |
| UNC50     | unc-50 homolog ( <i>C. elegans</i> )                                           |
| UNK       | unkempt family zinc finger                                                     |
| UPF2      | UPF2 regulator of nonsense transcripts homolog (yeast)                         |
| UPF3A     | UPF3 regulator of nonsense transcripts homolog A (yeast)                       |
| UQCC1     | ubiquinol-cytochrome c reductase complex assembly factor 1                     |
| UQCC2     | ubiquinol-cytochrome c reductase complex assembly factor 2                     |
| UQCC3     | ubiquinol-cytochrome c reductase complex assembly factor 3                     |
| UQCR11    | ubiquinol-cytochrome c reductase, complex III subunit XI                       |
| UQCRC1    | ubiquinol-cytochrome c reductase core protein I                                |
| UQCRC2    | ubiquinol-cytochrome c reductase core protein II                               |
| UQCRH     | ubiquinol-cytochrome c reductase hinge protein                                 |
| UQCRQ     | ubiquinol-cytochrome c reductase, complex III subunit VII, 9.5kDa              |
| URB2      | URB2 ribosome biogenesis 2 homolog ( <i>S. cerevisiae</i> )                    |
| URGCP     | upregulator of cell proliferation                                              |
| URM1      | ubiquitin related modifier 1                                                   |
| UROS      | uroporphyrinogen III synthase                                                  |
| USE1      | unconventional SNARE in the ER 1 homolog ( <i>S. cerevisiae</i> )              |
| USF1      | upstream transcription factor 1                                                |
| USF2      | upstream transcription factor 2, c-fos interacting                             |
| USO1      | USO1 vesicle transport factor                                                  |
| USP1      | ubiquitin specific peptidase 1                                                 |
| USP12     | ubiquitin specific peptidase 12                                                |
| USP15     | ubiquitin specific peptidase 15                                                |
| USP16     | ubiquitin specific peptidase 16                                                |
| USP19     | ubiquitin specific peptidase 19                                                |
| USP21     | ubiquitin specific peptidase 21                                                |
| USP24     | ubiquitin specific peptidase 24                                                |
| USP3      | ubiquitin specific peptidase 3                                                 |
| USP30     | ubiquitin specific peptidase 30                                                |
| USP32     | ubiquitin specific peptidase 32                                                |
| USP34     | ubiquitin specific peptidase 34                                                |
| USP36     | ubiquitin specific peptidase 36                                                |

|        |                                                                                  |
|--------|----------------------------------------------------------------------------------|
| USP37  | ubiquitin specific peptidase 37                                                  |
| USP38  | ubiquitin specific peptidase 38                                                  |
| USP39  | ubiquitin specific peptidase 39                                                  |
| USP4   | ubiquitin specific peptidase 4 (proto-oncogene)                                  |
| USP42  | ubiquitin specific peptidase 42                                                  |
| USP45  | ubiquitin specific peptidase 45                                                  |
| USP47  | ubiquitin specific peptidase 47                                                  |
| USP48  | ubiquitin specific peptidase 48                                                  |
| USP49  | ubiquitin specific peptidase 49                                                  |
| USP5   | ubiquitin specific peptidase 5 (isopeptidase T)                                  |
| USP53  | ubiquitin specific peptidase 53                                                  |
| USP9X  | ubiquitin specific peptidase 9, X-linked                                         |
| USPL1  | ubiquitin specific peptidase like 1                                              |
| UTP11L | UTP11-like, U3 small nucleolar ribonucleoprotein (yeast)                         |
| UTP18  | UTP18 small subunit (SSU) processome component homolog (yeast)                   |
| UTP23  | UTP23, small subunit (SSU) processome component, homolog (yeast)                 |
| UTP3   | UTP3, small subunit (SSU) processome component, homolog ( <i>S. cerevisiae</i> ) |
| UTS2B  | urotensin 2B                                                                     |
| UVRAG  | UV radiation resistance associated                                               |
| UXS1   | UDP-glucuronate decarboxylase 1                                                  |
| VAMP1  | vesicle-associated membrane protein 1 (synaptobrevin 1)                          |
| VAMP4  | vesicle-associated membrane protein 4                                            |
| VAPA   | VAMP (vesicle-associated membrane protein)-associated protein A, 33kDa           |
| VASP   | vasodilator-stimulated phosphoprotein                                            |
| VAV1   | vav 1 guanine nucleotide exchange factor                                         |
| VCP    | valosin containing protein                                                       |
| VCPIP1 | valosin containing protein (p97)/p47 complex interacting protein 1               |
| VCPKMT | valosin containing protein lysine (K) methyltransferase                          |
| VDAC1  | voltage-dependent anion channel 1                                                |
| VDAC2  | voltage-dependent anion channel 2                                                |
| VDAC3  | voltage-dependent anion channel 3                                                |
| VEGFA  | vascular endothelial growth factor A                                             |
| VEZF1  | vascular endothelial zinc finger 1                                               |
| VEZT   | vezatin, adherens junctions transmembrane protein                                |
| VHL    | von Hippel-Lindau tumor suppressor, E3 ubiquitin protein ligase                  |
| VKORC1 | vitamin K epoxide reductase complex, subunit 1                                   |
| VMAC   | vimentin-type intermediate filament associated coiled-coil protein               |
| VMP1   | vacuole membrane protein 1                                                       |
| VPREB3 | pre-B lymphocyte 3                                                               |
| VPS13B | vacuolar protein sorting 13 homolog B (yeast)                                    |
| VPS13C | vacuolar protein sorting 13 homolog C ( <i>S. cerevisiae</i> )                   |



|          |                                                                |
|----------|----------------------------------------------------------------|
| VPS18    | vacuolar protein sorting 18 homolog ( <i>S. cerevisiae</i> )   |
| VPS25    | vacuolar protein sorting 25 homolog ( <i>S. cerevisiae</i> )   |
| VPS26A   | vacuolar protein sorting 26 homolog A ( <i>S. pombe</i> )      |
| VPS26B   | vacuolar protein sorting 26 homolog B ( <i>S. pombe</i> )      |
| VPS28    | vacuolar protein sorting 28 homolog ( <i>S. cerevisiae</i> )   |
| VPS29    | vacuolar protein sorting 29 homolog ( <i>S. cerevisiae</i> )   |
| VPS33A   | vacuolar protein sorting 33 homolog A ( <i>S. cerevisiae</i> ) |
| VPS36    | vacuolar protein sorting 36 homolog ( <i>S. cerevisiae</i> )   |
| VPS37A   | vacuolar protein sorting 37 homolog A ( <i>S. cerevisiae</i> ) |
| VPS37C   | vacuolar protein sorting 37 homolog C ( <i>S. cerevisiae</i> ) |
| VPS39    | vacuolar protein sorting 39 homolog ( <i>S. cerevisiae</i> )   |
| VPS45    | vacuolar protein sorting 45 homolog ( <i>S. cerevisiae</i> )   |
| VPS4B    | vacuolar protein sorting 4 homolog B ( <i>S. cerevisiae</i> )  |
| VPS53    | vacuolar protein sorting 53 homolog ( <i>S. cerevisiae</i> )   |
| VPS72    | vacuolar protein sorting 72 homolog ( <i>S. cerevisiae</i> )   |
| VPS9D1   | VPS9 domain containing 1                                       |
| VRK2     | vaccinia related kinase 2                                      |
| VSX2     | visual system homeobox 2                                       |
| VTA1     | vesicle (multivesicular body) trafficking 1                    |
| VTI1A    | vesicle transport through interaction with t-SNAREs 1A         |
| VTI1B    | vesicle transport through interaction with t-SNAREs 1B         |
| VTN      | vitronectin                                                    |
| VTRNA1-1 | vault RNA 1-1                                                  |
| VWA8     | von Willebrand factor A domain containing 8                    |
| VWA9     | von Willebrand factor A domain containing 9                    |
| VWCE     | von Willebrand factor C and EGF domains                        |
| WAC      | WW domain containing adaptor with coiled-coil                  |
| WARS     | tryptophanyl-tRNA synthetase                                   |
| WARS2    | tryptophanyl tRNA synthetase 2, mitochondrial                  |
| WASF2    | WAS protein family, member 2                                   |
| WASL     | Wiskott-Aldrich syndrome-like                                  |
| WBP1     | WW domain binding protein 1                                    |
| WBP1L    | WW domain binding protein 1-like                               |
| WBP2     | WW domain binding protein 2                                    |
| WBP2NL   | WBP2 N-terminal like                                           |
| WBP4     | WW domain binding protein 4                                    |
| WBSCR22  | Williams Beuren syndrome chromosome region 22                  |
| WDFY2    | WD repeat and FYVE domain containing 2                         |
| WDFY4    | WDFY family member 4                                           |
| WDPCP    | WD repeat containing planar cell polarity effector             |
| WDR1     | WD repeat domain 1                                             |

|         |                                                        |
|---------|--------------------------------------------------------|
| WDR11   | WD repeat domain 11                                    |
| WDR18   | WD repeat domain 18                                    |
| WDR24   | WD repeat domain 24                                    |
| WDR25   | WD repeat domain 25                                    |
| WDR27   | WD repeat domain 27                                    |
| WDR31   | WD repeat domain 31                                    |
| WDR33   | WD repeat domain 33                                    |
| WDR34   | WD repeat domain 34                                    |
| WDR36   | WD repeat domain 36                                    |
| WDR4    | WD repeat domain 4                                     |
| WDR41   | WD repeat domain 41                                    |
| WDR43   | WD repeat domain 43                                    |
| WDR44   | WD repeat domain 44                                    |
| WDR47   | WD repeat domain 47                                    |
| WDR53   | WD repeat domain 53                                    |
| WDR54   | WD repeat domain 54                                    |
| WDR55   | WD repeat domain 55                                    |
| WDR5B   | WD repeat domain 5B                                    |
| WDR6    | WD repeat domain 6                                     |
| WDR60   | WD repeat domain 60                                    |
| WDR62   | WD repeat domain 62                                    |
| WDR74   | WD repeat domain 74                                    |
| WDR75   | WD repeat domain 75                                    |
| WDR78   | WD repeat domain 78                                    |
| WDR81   | WD repeat domain 81                                    |
| WDR82   | WD repeat domain 82                                    |
| WDR83   | WD repeat domain 83                                    |
| WDR83OS | WD repeat domain 83 opposite strand                    |
| WDR87   | WD repeat domain 87                                    |
| WDR89   | WD repeat domain 89                                    |
| WDR90   | WD repeat domain 90                                    |
| WDR92   | WD repeat domain 92                                    |
| WDTC1   | WD and tetratricopeptide repeats 1                     |
| WFDC3   | WAP four-disulfide core domain 3                       |
| WHSC1   | Wolf-Hirschhorn syndrome candidate 1                   |
| WIBG    | within bgcn homolog (Drosophila)                       |
| WIPI1   | WD repeat domain, phosphoinositide interacting 1       |
| WIZ     | widely interspaced zinc finger motifs                  |
| WNK1    | WNK lysine deficient protein kinase 1                  |
| WNT1    | wingless-type MMTV integration site family, member 1   |
| WNT10A  | wingless-type MMTV integration site family, member 10A |

|          |                                                                                                        |
|----------|--------------------------------------------------------------------------------------------------------|
| WNT2B    | wingless-type MMTV integration site family, member 2B                                                  |
| WRAP53   | WD repeat containing, antisense to TP53                                                                |
| WSB1     | WD repeat and SOCS box containing 1                                                                    |
| WSB2     | WD repeat and SOCS box containing 2                                                                    |
| WTAP     | Wilms tumor 1 associated protein                                                                       |
| WWOX     | WW domain containing oxidoreductase                                                                    |
| WWP2     | WW domain containing E3 ubiquitin protein ligase 2                                                     |
| XAB2     | XPA binding protein 2                                                                                  |
| XBP1     | X-box binding protein 1                                                                                |
| XIST     | X inactive specific transcript (non-protein coding)                                                    |
| XKR7     | XK, Kell blood group complex subunit-related family, member 7                                          |
| XPC      | xeroderma pigmentosum, complementation group C                                                         |
| XPNPEP3  | X-prolyl aminopeptidase 3, mitochondrial                                                               |
| XPO1     | exportin 1                                                                                             |
| XPO4     | exportin 4                                                                                             |
| XPO5     | exportin 5                                                                                             |
| XPOT     | exportin, tRNA                                                                                         |
| XRCC2    | X-ray repair complementing defective repair in Chinese hamster cells 2                                 |
| XRCC4    | X-ray repair complementing defective repair in Chinese hamster cells 4                                 |
| XRCC5    | X-ray repair complementing defective repair in Chinese hamster cells 5 (double-strand-break rejoining) |
| XRCC6    | X-ray repair complementing defective repair in Chinese hamster cells 6                                 |
| XRCC6BP1 | XRCC6 binding protein 1                                                                                |
| XRN1     | 5'-3' exoribonuclease 1                                                                                |
| XRN2     | 5'-3' exoribonuclease 2                                                                                |
| XRRA1    | X-ray radiation resistance associated 1                                                                |
| XXYL1    | xyloside xylosyltransferase 1                                                                          |
| XYLT2    | xylosyltransferase II                                                                                  |
| YAE1D1   | Yae1 domain containing 1                                                                               |
| YARS     | tyrosyl-tRNA synthetase                                                                                |
| YARS2    | tyrosyl-tRNA synthetase 2, mitochondrial                                                               |
| YBEY     | ybeY metalloproteinase (putative)                                                                      |
| YBX1     | Y box binding protein 1                                                                                |
| YBX3     | Y box binding protein 3                                                                                |
| YDJC     | YdjC homolog (bacterial)                                                                               |
| YEATS4   | YEATS domain containing 4                                                                              |
| YIF1A    | Yip1 interacting factor homolog A ( <i>S. cerevisiae</i> )                                             |
| YIPF2    | Yip1 domain family, member 2                                                                           |
| YIPF3    | Yip1 domain family, member 3                                                                           |
| YLPM1    | YLP motif containing 1                                                                                 |
| YME1L1   | YME1-like 1 ATPase                                                                                     |
| YOD1     | YOD1 deubiquitinase                                                                                    |

|         |                                                                                 |
|---------|---------------------------------------------------------------------------------|
| YTHDC1  | YTH domain containing 1                                                         |
| YTHDF2  | YTH N(6)-methyladenosine RNA binding protein 2                                  |
| YTHDF3  | YTH N(6)-methyladenosine RNA binding protein 3                                  |
| YWHAE   | tyrosine 3-monooxygenase/tryptophan 5-monooxygenase activation protein, epsilon |
| YWHAG   | tyrosine 3-monooxygenase/tryptophan 5-monooxygenase activation protein, gamma   |
| YWHAQ   | tyrosine 3-monooxygenase/tryptophan 5-monooxygenase activation protein, theta   |
| YWHAZ   | tyrosine 3-monooxygenase/tryptophan 5-monooxygenase activation protein, zeta    |
| YY1AP1  | YY1 associated protein 1                                                        |
| ZACN    | zinc activated ligand-gated ion channel                                         |
| ZBED5   | zinc finger, BED-type containing 5                                              |
| ZBP1    | Z-DNA binding protein 1                                                         |
| ZBTB1   | zinc finger and BTB domain containing 1                                         |
| ZBTB10  | zinc finger and BTB domain containing 10                                        |
| ZBTB11  | zinc finger and BTB domain containing 11                                        |
| ZBTB17  | zinc finger and BTB domain containing 17                                        |
| ZBTB2   | zinc finger and BTB domain containing 2                                         |
| ZBTB21  | zinc finger and BTB domain containing 21                                        |
| ZBTB25  | zinc finger and BTB domain containing 25                                        |
| ZBTB3   | zinc finger and BTB domain containing 3                                         |
| ZBTB32  | zinc finger and BTB domain containing 32                                        |
| ZBTB37  | zinc finger and BTB domain containing 37                                        |
| ZBTB4   | zinc finger and BTB domain containing 4                                         |
| ZBTB40  | zinc finger and BTB domain containing 40                                        |
| ZBTB41  | zinc finger and BTB domain containing 41                                        |
| ZBTB43  | zinc finger and BTB domain containing 43                                        |
| ZBTB45  | zinc finger and BTB domain containing 45                                        |
| ZBTB5   | zinc finger and BTB domain containing 5                                         |
| ZBTB6   | zinc finger and BTB domain containing 6                                         |
| ZBTB7B  | zinc finger and BTB domain containing 7B                                        |
| ZBTB8OS | zinc finger and BTB domain containing 8 opposite strand                         |
| ZC2HC1A | zinc finger, C2HC-type containing 1A                                            |
| ZC2HC1B | zinc finger, C2HC-type containing 1B                                            |
| ZC3H10  | zinc finger CCCH-type containing 10                                             |
| ZC3H12D | zinc finger CCCH-type containing 12D                                            |
| ZC3H13  | zinc finger CCCH-type containing 13                                             |
| ZC3H14  | zinc finger CCCH-type containing 14                                             |
| ZC3H15  | zinc finger CCCH-type containing 15                                             |
| ZC3H3   | zinc finger CCCH-type containing 3                                              |
| ZC3H4   | zinc finger CCCH-type containing 4                                              |

|          |                                           |
|----------|-------------------------------------------|
| ZC3H6    | zinc finger CCCH-type containing 6        |
| ZC3H7A   | zinc finger CCCH-type containing 7A       |
| ZC3H7B   | zinc finger CCCH-type containing 7B       |
| ZC3H8    | zinc finger CCCH-type containing 8        |
| ZC3HAV1  | zinc finger CCCH-type, antiviral 1        |
| ZC3HC1   | zinc finger, C3HC-type containing 1       |
| ZCCHC10  | zinc finger, CCHC domain containing 10    |
| ZCCHC2   | zinc finger, CCHC domain containing 2     |
| ZCCHC3   | zinc finger, CCHC domain containing 3     |
| ZCCHC4   | zinc finger, CCHC domain containing 4     |
| ZCCHC6   | zinc finger, CCHC domain containing 6     |
| ZCCHC8   | zinc finger, CCHC domain containing 8     |
| ZCCHC9   | zinc finger, CCHC domain containing 9     |
| ZCWPW1   | zinc finger, CW type with PWWP domain 1   |
| ZDHHC12  | zinc finger, DHHC-type containing 12      |
| ZDHHC16  | zinc finger, DHHC-type containing 16      |
| ZDHHC3   | zinc finger, DHHC-type containing 3       |
| ZDHHC4   | zinc finger, DHHC-type containing 4       |
| ZDHHC5   | zinc finger, DHHC-type containing 5       |
| ZDHHC6   | zinc finger, DHHC-type containing 6       |
| ZEB1     | zinc finger E-box binding homeobox 1      |
| ZEB1-AS1 | ZEB1 antisense RNA 1                      |
| ZFAND2A  | zinc finger, AN1-type domain 2A           |
| ZFAND2B  | zinc finger, AN1-type domain 2B           |
| ZFAND3   | zinc finger, AN1-type domain 3            |
| ZFAND5   | zinc finger, AN1-type domain 5            |
| ZFAS1    | ZNFX1 antisense RNA 1                     |
| ZFAT     | zinc finger and AT hook domain containing |
| ZFAT-AS1 | ZFAT antisense RNA 1                      |
| ZFC3H1   | zinc finger, C3H1-type containing         |
| ZFHX2    | zinc finger homeobox 2                    |
| ZFP3     | ZFP3 zinc finger protein                  |
| ZFP30    | ZFP30 zinc finger protein                 |
| ZFP36    | ZFP36 ring finger protein                 |
| ZFP36L1  | ZFP36 ring finger protein-like 1          |
| ZFP36L2  | ZFP36 ring finger protein-like 2          |
| ZFP62    | ZFP62 zinc finger protein                 |
| ZFP64    | ZFP64 zinc finger protein                 |
| ZFP69    | ZFP69 zinc finger protein                 |
| ZFP69B   | ZFP69 zinc finger protein B               |
| ZFP90    | ZFP90 zinc finger protein                 |

|            |                                          |
|------------|------------------------------------------|
| ZFP91      | ZFP91 zinc finger protein                |
| ZFP91-CNTF | ZFP91-CNTF readthrough (NMD candidate)   |
| ZFPL1      | zinc finger protein-like 1               |
| ZFR        | zinc finger RNA binding protein          |
| ZFYVE26    | zinc finger, FYVE domain containing 26   |
| ZFYVE27    | zinc finger, FYVE domain containing 27   |
| ZGRF1      | zinc finger, GRF-type containing 1       |
| ZHX2       | zinc fingers and homeoboxes 2            |
| ZKSCAN2    | zinc finger with KRAB and SCAN domains 2 |
| ZKSCAN3    | zinc finger with KRAB and SCAN domains 3 |
| ZKSCAN5    | zinc finger with KRAB and SCAN domains 5 |
| ZMAT2      | zinc finger, matrin-type 2               |
| ZMAT3      | zinc finger, matrin-type 3               |
| ZMPSTE24   | zinc metallopeptidase STE24              |
| ZMYM1      | zinc finger, MYM-type 1                  |
| ZMYM2      | zinc finger, MYM-type 2                  |
| ZMYM5      | zinc finger, MYM-type 5                  |
| ZMYM6      | zinc finger, MYM-type 6                  |
| ZMYND12    | zinc finger, MYND-type containing 12     |
| ZMYND8     | zinc finger, MYND-type containing 8      |
| ZNF10      | zinc finger protein 10                   |
| ZNF101     | zinc finger protein 101                  |
| ZNF114     | zinc finger protein 114                  |
| ZNF121     | zinc finger protein 121                  |
| ZNF131     | zinc finger protein 131                  |
| ZNF132     | zinc finger protein 132                  |
| ZNF138     | zinc finger protein 138                  |
| ZNF140     | zinc finger protein 140                  |
| ZNF142     | zinc finger protein 142                  |
| ZNF143     | zinc finger protein 143                  |
| ZNF146     | zinc finger protein 146                  |
| ZNF148     | zinc finger protein 148                  |
| ZNF182     | zinc finger protein 182                  |
| ZNF184     | zinc finger protein 184                  |
| ZNF195     | zinc finger protein 195                  |
| ZNF2       | zinc finger protein 2                    |
| ZNF200     | zinc finger protein 200                  |
| ZNF202     | zinc finger protein 202                  |
| ZNF207     | zinc finger protein 207                  |
| ZNF212     | zinc finger protein 212                  |
| ZNF219     | zinc finger protein 219                  |

|         |                                     |
|---------|-------------------------------------|
| ZNF23   | zinc finger protein 23              |
| ZNF234  | zinc finger protein 234             |
| ZNF236  | zinc finger protein 236             |
| ZNF24   | zinc finger protein 24              |
| ZNF250  | zinc finger protein 250             |
| ZNF251  | zinc finger protein 251             |
| ZNF254  | zinc finger protein 254             |
| ZNF26   | zinc finger protein 26              |
| ZNF263  | zinc finger protein 263             |
| ZNF267  | zinc finger protein 267             |
| ZNF268  | zinc finger protein 268             |
| ZNF271P | zinc finger protein 271, pseudogene |
| ZNF274  | zinc finger protein 274             |
| ZNF276  | zinc finger protein 276             |
| ZNF282  | zinc finger protein 282             |
| ZNF292  | zinc finger protein 292             |
| ZNF296  | zinc finger protein 296             |
| ZNF3    | zinc finger protein 3               |
| ZNF302  | zinc finger protein 302             |
| ZNF304  | zinc finger protein 304             |
| ZNF321P | zinc finger protein 321, pseudogene |
| ZNF335  | zinc finger protein 335             |
| ZNF33A  | zinc finger protein 33A             |
| ZNF33B  | zinc finger protein 33B             |
| ZNF34   | zinc finger protein 34              |
| ZNF35   | zinc finger protein 35              |
| ZNF366  | zinc finger protein 366             |
| ZNF367  | zinc finger protein 367             |
| ZNF37A  | zinc finger protein 37A             |
| ZNF384  | zinc finger protein 384             |
| ZNF394  | zinc finger protein 394             |
| ZNF397  | zinc finger protein 397             |
| ZNF398  | zinc finger protein 398             |
| ZNF408  | zinc finger protein 408             |
| ZNF410  | zinc finger protein 410             |
| ZNF425  | zinc finger protein 425             |
| ZNF426  | zinc finger protein 426             |
| ZNF428  | zinc finger protein 428             |
| ZNF432  | zinc finger protein 432             |
| ZNF433  | zinc finger protein 433             |
| ZNF436  | zinc finger protein 436             |

|            |                          |
|------------|--------------------------|
| ZNF436-AS1 | ZNF436 antisense RNA 1   |
| ZNF438     | zinc finger protein 438  |
| ZNF446     | zinc finger protein 446  |
| ZNF451     | zinc finger protein 451  |
| ZNF460     | zinc finger protein 460  |
| ZNF48      | zinc finger protein 48   |
| ZNF490     | zinc finger protein 490  |
| ZNF496     | zinc finger protein 496  |
| ZNF497     | zinc finger protein 497  |
| ZNF511     | zinc finger protein 511  |
| ZNF512B    | zinc finger protein 512B |
| ZNF513     | zinc finger protein 513  |
| ZNF518A    | zinc finger protein 518A |
| ZNF524     | zinc finger protein 524  |
| ZNF527     | zinc finger protein 527  |
| ZNF543     | zinc finger protein 543  |
| ZNF546     | zinc finger protein 546  |
| ZNF547     | zinc finger protein 547  |
| ZNF548     | zinc finger protein 548  |
| ZNF552     | zinc finger protein 552  |
| ZNF554     | zinc finger protein 554  |
| ZNF555     | zinc finger protein 555  |
| ZNF561     | zinc finger protein 561  |
| ZNF565     | zinc finger protein 565  |
| ZNF573     | zinc finger protein 573  |
| ZNF574     | zinc finger protein 574  |
| ZNF575     | zinc finger protein 575  |
| ZNF576     | zinc finger protein 576  |
| ZNF579     | zinc finger protein 579  |
| ZNF580     | zinc finger protein 580  |
| ZNF581     | zinc finger protein 581  |
| ZNF583     | zinc finger protein 583  |
| ZNF584     | zinc finger protein 584  |
| ZNF587     | zinc finger protein 587  |
| ZNF589     | zinc finger protein 589  |
| ZNF592     | zinc finger protein 592  |
| ZNF593     | zinc finger protein 593  |
| ZNF594     | zinc finger protein 594  |
| ZNF598     | zinc finger protein 598  |
| ZNF605     | zinc finger protein 605  |
| ZNF614     | zinc finger protein 614  |



|         |                                           |
|---------|-------------------------------------------|
| ZNF616  | zinc finger protein 616                   |
| ZNF621  | zinc finger protein 621                   |
| ZNF622  | zinc finger protein 622                   |
| ZNF623  | zinc finger protein 623                   |
| ZNF627  | zinc finger protein 627                   |
| ZNF628  | zinc finger protein 628                   |
| ZNF639  | zinc finger protein 639                   |
| ZNF644  | zinc finger protein 644                   |
| ZNF646  | zinc finger protein 646                   |
| ZNF653  | zinc finger protein 653                   |
| ZNF655  | zinc finger protein 655                   |
| ZNF668  | zinc finger protein 668                   |
| ZNF671  | zinc finger protein 671                   |
| ZNF672  | zinc finger protein 672                   |
| ZNF678  | zinc finger protein 678                   |
| ZNF687  | zinc finger protein 687                   |
| ZNF688  | zinc finger protein 688                   |
| ZNF689  | zinc finger protein 689                   |
| ZNF692  | zinc finger protein 692                   |
| ZNF696  | zinc finger protein 696                   |
| ZNF70   | zinc finger protein 70                    |
| ZNF706  | zinc finger protein 706                   |
| ZNF720  | zinc finger protein 720                   |
| ZNF721  | zinc finger protein 721                   |
| ZNF724P | zinc finger protein 724, pseudogene       |
| ZNF740  | zinc finger protein 740                   |
| ZNF747  | zinc finger protein 747                   |
| ZNF749  | zinc finger protein 749                   |
| ZNF76   | zinc finger protein 76                    |
| ZNF763  | zinc finger protein 763                   |
| ZNF764  | zinc finger protein 764                   |
| ZNF767P | zinc finger family member 767, pseudogene |
| ZNF768  | zinc finger protein 768                   |
| ZNF77   | zinc finger protein 77                    |
| ZNF770  | zinc finger protein 770                   |
| ZNF775  | zinc finger protein 775                   |
| ZNF783  | zinc finger family member 783             |
| ZNF784  | zinc finger protein 784                   |
| ZNF785  | zinc finger protein 785                   |
| ZNF786  | zinc finger protein 786                   |
| ZNF789  | zinc finger protein 789                   |

|         |                                                     |
|---------|-----------------------------------------------------|
| ZNF79   | zinc finger protein 79                              |
| ZNF791  | zinc finger protein 791                             |
| ZNF8    | zinc finger protein 8                               |
| ZNF800  | zinc finger protein 800                             |
| ZNF805  | zinc finger protein 805                             |
| ZNF827  | zinc finger protein 827                             |
| ZNF830  | zinc finger protein 830                             |
| ZNF837  | zinc finger protein 837                             |
| ZNF839  | zinc finger protein 839                             |
| ZNF843  | zinc finger protein 843                             |
| ZNF846  | zinc finger protein 846                             |
| ZNF92   | zinc finger protein 92                              |
| ZNFX1   | zinc finger, NFX1-type containing 1                 |
| ZNHIT2  | zinc finger, HIT-type containing 2                  |
| ZNHIT3  | zinc finger, HIT-type containing 3                  |
| ZNHIT6  | zinc finger, HIT-type containing 6                  |
| ZNRD1   | zinc ribbon domain containing 1                     |
| ZNRF1   | zinc and ring finger 1, E3 ubiquitin protein ligase |
| ZNRF2   | zinc and ring finger 2, E3 ubiquitin protein ligase |
| ZPBP2   | zona pellucida binding protein 2                    |
| ZRANB2  | zinc finger, RAN-binding domain containing 2        |
| ZRANB3  | zinc finger, RAN-binding domain containing 3        |
| ZSCAN12 | zinc finger and SCAN domain containing 12           |
| ZSCAN16 | zinc finger and SCAN domain containing 16           |
| ZSCAN21 | zinc finger and SCAN domain containing 21           |
| ZSCAN22 | zinc finger and SCAN domain containing 22           |
| ZSCAN25 | zinc finger and SCAN domain containing 25           |
| ZSCAN26 | zinc finger and SCAN domain containing 26           |
| ZSCAN30 | zinc finger and SCAN domain containing 30           |
| ZSCAN31 | zinc finger and SCAN domain containing 31           |
| ZSWIM1  | zinc finger, SWIM-type containing 1                 |
| ZSWIM3  | zinc finger, SWIM-type containing 3                 |
| ZSWIM4  | zinc finger, SWIM-type containing 4                 |
| ZSWIM7  | zinc finger, SWIM-type containing 7                 |
| ZSWIM8  | zinc finger, SWIM-type containing 8                 |
| ZW10    | zw10 kinetochore protein                            |
| ZWILCH  | zwilch kinetochore protein                          |
| ZYX     | zyxin                                               |
| ZZEF1   | zinc finger, ZZ-type with EF-hand domain 1          |
| ZZZ3    | zinc finger, ZZ-type containing 3                   |

**Supplementary Table 6. List of 371 NFATC1 targets indicated in the KEGG metabolic pathway.**

| <b>Gene_Name</b> |
|------------------|
| AASDH            |
| ACAA1            |
| ACACA            |
| ACADM            |
| ACADS            |
| ACADVL           |
| ACAT1            |
| ACAT2            |
| ACO2             |
| ACOT2            |
| ACOX1            |
| ACOX3            |
| ACSL1            |
| ACY3             |
| ACYP2            |
| ADH5             |
| ADI1             |
| ADSL             |
| ADSS             |
| AFMID            |
| AGL              |
| AGPAT3           |
| AGPS             |
| AHCYL2           |
| AK2              |
| AKR1A1           |
| ALAS1            |
| ALDH18A1         |
| ALDH3A1          |
| ALDH4A1          |
| ALDH6A1          |

|          |
|----------|
| ALDH9A1  |
| ALDOA    |
| AMD1     |
| AMDHD2   |
| AMPD2    |
| AMT      |
| AOC2     |
| APOE     |
| APRT     |
| ASAH1    |
| ASH1L    |
| ATIC     |
| ATP5B    |
| ATP5E    |
| ATP5G1   |
| ATP5G2   |
| ATP5G3   |
| ATP5I    |
| ATP5J    |
| ATP5L    |
| ATP6V0A2 |
| ATP6V0B  |
| ATP6V0D1 |
| ATP6V1A  |
| ATP6V1C1 |
| ATP6V1D  |
| ATP6V1G1 |
| ATP6V1G2 |
| ATP6V1H  |
| B4GALT1  |
| B4GALT6  |
| BCAT1    |
| BCAT2    |
| BCKDHA   |
| CAD      |
| CDIPT    |
| CDS2     |
| CMPK1    |
| COX11    |
| COX15    |
| COX17    |

|         |
|---------|
| COX5A   |
| COX5B   |
| COX6C   |
| COX7A2  |
| COX7A2L |
| COX7B   |
| COX7C   |
| COX8A   |
| CPT1C   |
| CRLS1   |
| CS      |
| CTH     |
| CYC1    |
| CYP1B1  |
| CYP51A1 |
| DBT     |
| DCK     |
| DCTD    |
| DCXR    |
| DEGS1   |
| DGAT1   |
| DGKA    |
| DGKH    |
| DGUOK   |
| DHODH   |
| DLAT    |
| DLD     |
| DLST    |
| DNMT1   |
| DNMT3A  |
| DOT1L   |
| DUT     |
| EBP     |
| ECI1    |
| EHMT1   |
| ELOVL5  |
| ENO1    |
| ENO2    |
| ENOPH1  |
| FADS1   |
| FADS2   |

|          |
|----------|
| FPGT     |
| FUK      |
| GALE     |
| GALK2    |
| GALM     |
| GANC     |
| GAPDH    |
| GART     |
| GBA      |
| GBE1     |
| GCDH     |
| GGT5     |
| GLB1     |
| GLS      |
| GLS2     |
| GLUD1    |
| GLYCK    |
| GMPPB    |
| GMPR2    |
| GNPAT    |
| GOT2     |
| GPAM     |
| GPD2     |
| GPX1     |
| GPX3     |
| GPX4     |
| GUSB     |
| GYS1     |
| H6PD     |
| HADH     |
| HADHA    |
| HADHB    |
| HAGH     |
| HAGHL    |
| HEMK1    |
| HEXA     |
| HIBADH   |
| HMGCL    |
| HMGCR    |
| HPD      |
| HSD17B12 |

|                   |
|-------------------|
| HYI               |
| IARS              |
| IDH3A             |
| IDH3B             |
| IL4I1             |
| IMPA1             |
| IMPDH2            |
| INPP5E            |
| INPP5K            |
| IPMK              |
| IPPK              |
| ISYNA1            |
| ITPA              |
| ITPKB             |
| JMJD7-<br>PLA2G4B |
| KDSR              |
| KHK               |
| KMO               |
| LAP3              |
| LARS              |
| LCAT              |
| LCLAT1            |
| LCMT2             |
| LDHA              |
| LDHB              |
| LDLR              |
| LPCAT3            |
| LPCAT4            |
| LRPAP1            |
| LTA4H             |
| LTC4S             |
| LYPLA2            |
| MAT2A             |
| MBOAT7            |
| MCCC1             |
| MCCC2             |
| MCEE              |
| MDH1              |
| MDH2              |
| METTL2B           |
| METTL6            |

|          |
|----------|
| MGLL     |
| MIF      |
| MINPP1   |
| MPI      |
| MSMO1    |
| MTHFD1   |
| MTHFD2   |
| MTMR2    |
| MTMR6    |
| MTR      |
| MUT      |
| NAGK     |
| NANP     |
| NANS     |
| NAT6     |
| NDUFA10  |
| NDUFA11  |
| NDUFA2   |
| NDUFA4   |
| NDUFA4L2 |
| NDUFA5   |
| NDUFA6   |
| NDUFA7   |
| NDUFA9   |
| NDUFAB1  |
| NDUFB1   |
| NDUFB10  |
| NDUFB2   |
| NDUFB3   |
| NDUFB5   |
| NDUFB6   |
| NDUFB7   |
| NDUFB9   |
| NDUFC1   |
| NDUFC2   |
| NDUFS1   |
| NDUFS3   |
| NDUFS5   |
| NDUFS6   |
| NDUFS7   |
| NDUFS8   |



|           |
|-----------|
| NDUFV3    |
| NEU1      |
| NEU3      |
| NME1      |
| NME1-NME2 |
| NME3      |
| NME6      |
| NPL       |
| NSD1      |
| NT5C      |
| NT5C2     |
| NT5E      |
| NUDT5     |
| NUDT9     |
| ODC1      |
| OGDH      |
| OXCT1     |
| P4HA1     |
| PAFAH1B2  |
| PAFAH1B3  |
| PAFAH2    |
| PAICS     |
| PCCB      |
| PCK2      |
| PCYT1A    |
| PCYT2     |
| PDE1B     |
| PDE4A     |
| PDE7A     |
| PDE8A     |
| PDE9A     |
| PEMT      |
| PFAS      |
| PFKL      |
| PFKM      |
| PGAM1     |
| PGAM2     |
| PGD       |
| PGLS      |
| PGM1      |
| PGM2      |

|          |
|----------|
| PGP      |
| PHOSPHO1 |
| PHPT1    |
| PI4KA    |
| PIK3CA   |
| PIK3CD   |
| PIK3CG   |
| PIKFYVE  |
| PIP4K2B  |
| PIP4K2C  |
| PIP5K1A  |
| PIP5K1B  |
| PISD     |
| PLA2G6   |
| PLOD1    |
| PMM1     |
| PNP      |
| PNPT1    |
| POLA2    |
| POLD1    |
| POLD2    |
| POLD3    |
| POLD4    |
| POLE     |
| POLE2    |
| POLE3    |
| POLE4    |
| POLR1A   |
| POLR1B   |
| POLR1C   |
| POLR2A   |
| POLR2B   |
| POLR2C   |
| POLR2F   |
| POLR2G   |
| POLR2H   |
| POLR2I   |
| POLR2K   |
| POLR2L   |
| POLR3A   |
| POLR3B   |

|        |
|--------|
| POLR3C |
| POLR3D |
| POLR3G |
| POLR3H |
| POLR3K |
| PPA2   |
| PPAT   |
| PRIM1  |
| PRIM2  |
| PSPH   |
| PTDSS1 |
| PTDSS2 |
| PTEN   |
| PTGES2 |
| PYCR2  |
| PYCRL  |
| PYGM   |
| RBKS   |
| RPIA   |
| RRM1   |
| RRM2   |
| RRM2B  |
| SAT1   |
| SCARB1 |
| SDHD   |
| SETD1A |
| SETD1B |
| SETD2  |
| SETDB1 |
| SETDB2 |
| SETMAR |
| SGPP2  |
| SHMT2  |
| SMPD1  |
| SMPD4  |
| SPHK2  |
| SPTLC1 |
| SRD5A1 |
| SUCLG2 |
| TCIRG1 |
| TECR   |

|         |
|---------|
| TK1     |
| TM7SF2  |
| TPI1    |
| TRMT11  |
| TSTA3   |
| TYMP    |
| TYMS    |
| UCKL1   |
| UGCG    |
| UGDH    |
| UGP2    |
| UMPS    |
| UQCR11  |
| UQCRC1  |
| UQCRC2  |
| UQCRH   |
| UQCRQ   |
| UXS1    |
| VAPA    |
| VDAC1   |
| VDAC2   |
| VDAC3   |
| WARS    |
| WARS2   |
| WBSCR22 |
| WHSC1   |
| YOD1    |
| ZNRD1   |

**Supplementary Table 7. GSEA KEGG pathway enrichment analysis of the gene list in (B).**

| Gene Set Name [# Genes (K)]              | Description                                 | # Genes in Overlap (k) | p-value  | FDR q-value |
|------------------------------------------|---------------------------------------------|------------------------|----------|-------------|
| KEGG_OXIDATIVE_PHOSPHORYLATION [131]     | Oxidative phosphorylation                   | 64                     | 1.29e-92 | 2.4e-90     |
| KEGG_PURINE_METABOLISM [159]             | Purine metabolism                           | 65                     | 1.57e-87 | 1.46e-85    |
| KEGG_PYRIMIDINE_METABOLISM [98]          | Pyrimidine metabolism                       | 55                     | 3.95e-84 | 2.45e-82    |
| KEGG_HUNTINGTONS_DISEASE [180]           | Huntington's disease                        | 60                     | 2.99e-74 | 1.39e-72    |
| KEGG_PARKINSONS_DISEASE [128]            | Parkinson's disease                         | 50                     | 4.95e-66 | 1.84e-64    |
| KEGG_ALZHEIMERS_DISEASE [165]            | Alzheimer's disease                         | 49                     | 9.34e-58 | 2.9e-56     |
| KEGG_VALINE_LEUCINE_AND_ISOLEUCINE_DEG   | Valine, leucine and isoleucine degradation  | 24                     | 1.07e-36 | 2.83e-35    |
| KEGG_RNA_POLYMERASE [29]                 | RNA polymerase                              | 20                     | 7.87e-34 | 1.83e-32    |
| KEGG_LYSINE_DEGRADATION [44]             | Lysine degradation                          | 21                     | 1.34e-30 | 2.77e-29    |
| KEGG_GLYCEROPHOSPHOLIPID_METABOLISM [77] | Glycerophospholipid metabolism              | 24                     | 2.45e-29 | 4.55e-28    |
| KEGG_INOSITOL_PHOSPHATE_METABOLISM [54]  | Inositol phosphate metabolism               | 21                     | 3.16e-28 | 5.34e-27    |
| KEGG_AMINO_SUGAR_AND_NUCLEOTIDE_SUGAR_   | Amino sugar and nucleotide sugar metabolism | 19                     | 9.87e-27 | 1.49e-25    |
| KEGG_GLYCOLYSIS_GLUONEOGENESIS [62]      | Glycolysis / Gluconeogenesis                | 21                     | 1.04e-26 | 1.49e-25    |
| KEGG_FATTY_ACID_METABOLISM [42]          | Fatty acid metabolism                       | 17                     | 1.89e-23 | 2.51e-22    |
| KEGG_PHOSPHATIDYLINOSITOL_SIGNALING_SY   | Phosphatidylinositol signaling system       | 19                     | 1.99e-21 | 2.47e-20    |

|                                           |                                             |    |              |              |
|-------------------------------------------|---------------------------------------------|----|--------------|--------------|
| KEGG_FRUCTOSE_AND_MANNOSE_METABOLISM [34] | Fructose and mannose metabolism             | 14 | 1.16<br>e-19 | 1.35<br>e-18 |
| KEGG_SPHINGOLIPID_METABOLISM [39]         | Sphingolipid metabolism                     | 14 | 1.2<br>e-18  | 1.31<br>e-17 |
| KEGG_CITRATE_CYCLE_TCA_CYCLE [31]         | Citrate cycle (TCA cycle)                   | 13 | 1.78<br>e-18 | 1.79<br>e-17 |
| KEGG_PYRUVATE_METABOLISM [40]             | Pyruvate metabolism                         | 14 | 1.83<br>e-18 | 1.79<br>e-17 |
| KEGG_TYROSINE_METABOLISM [42]             | Tyrosine metabolism                         | 14 | 4.09<br>e-18 | 3.8<br>e-17  |
| KEGG_PROPANOATE_METABOLISM [33]           | Propanoate metabolism                       | 13 | 4.85<br>e-18 | 4.3<br>e-17  |
| KEGG_CYSTEINE_AND_METHIONINE_METABOLIS    | Cysteine and methionine metabolism          | 13 | 7.78<br>e-18 | 6.58<br>e-17 |
| KEGG_BIOSYNTHESIS_OF_UNSATURATED_FATTY    | Biosynthesis of unsaturated fatty acids     | 11 | 6.66<br>e-17 | 5.39<br>e-16 |
| KEGG_GLYOXYLATE_AND_DICARBOXYLATE_META    | Glyoxylate and dicarboxylate metabolism     | 10 | 7.99<br>e-17 | 6.19<br>e-16 |
| KEGG_TRYPTOPHAN_METABOLISM [40]           | Tryptophan metabolism                       | 13 | 9.55<br>e-17 | 7.11<br>e-16 |
| KEGG_ARGININE_AND_PROLINE_METABOLISM [54] | Arginine and proline metabolism             | 14 | 2.25<br>e-16 | 1.61<br>e-15 |
| KEGG_ALANINE_ASPARTATE_AND GLUTAMATE_M    | Alanine, aspartate and glutamate metabolism | 11 | 1.11<br>e-14 | 7.66<br>e-14 |
| KEGG_GALACTOSE_METABOLISM [26]            | Galactose metabolism                        | 10 | 4.84<br>e-14 | 3.1<br>e-13  |
| KEGG_SELENOAMINO_ACID_METABOLISM [26]     | Selenoamino acid metabolism                 | 10 | 4.84<br>e-14 | 3.1<br>e-13  |
| KEGG_DNA_REPLICATION [36]                 | DNA replication                             | 11 | 5<br>e-14    | 3.1<br>e-13  |
| KEGG_CARDIAC_MUSCLE_CONTRACTION [78]      | Cardiac muscle contraction                  | 14 | 5.68<br>e-14 | 3.41<br>e-13 |
| KEGG_PENTOSE_PHOSPHATE_PATHWAY [27]       | Pentose phosphate pathway                   | 10 | 7.62<br>e-14 | 4.43<br>e-13 |
| KEGG_ONE_CARBON_POOL_BY_FOLATE [17]       | One carbon pool by folate                   | 8  | 2.39<br>e-12 | 1.35<br>e-11 |
| KEGG_STARCH_AND_SUCROSE_METABOLISM [52]   | Starch and sucrose metabolism               | 11 | 4.34<br>e-12 | 2.38<br>e-11 |
| KEGG_HISTIDINE_METABOLISM [29]            | Histidine metabolism                        | 9  | 8.87<br>e-12 | 4.72<br>e-11 |
| KEGG_GLYCEROLIPID_METABOLISM [49]         | Glycerolipid metabolism                     | 10 | 6.08<br>e-11 | 3.14<br>e-10 |
| KEGG_GLUTATHIONE_METABOLISM [50]          | Glutathione metabolism                      | 10 | 7.54<br>e-11 | 3.79<br>e-10 |
| KEGG_VIBRIO_CHOLERAЕ_INFECTION [54]       | Vibrio cholerae infection                   | 10 | 1.69<br>e-10 | 8.29<br>e-10 |
| KEGG_PHENYLALANINE_METABOLISM [18]        | Phenylalanine metabolism                    | 7  | 3.08         | 1.47         |

|                                                                      |                                                            |    |           |          |
|----------------------------------------------------------------------|------------------------------------------------------------|----|-----------|----------|
|                                                                      |                                                            |    | e-10      | e-9      |
| KEGG_GLYCINE_SERINE_AND_THREONINE_META                               | Glycine, serine and threonine metabolism                   | 8  | 6.84 e-10 | 3.18 e-9 |
| KEGG_BUTANOATE_METABOLISM [34]                                       | Butanoate metabolism                                       | 8  | 1.53 e-9  | 6.96 e-9 |
| KEGG_EPITHELIAL_CELL_SIGNALING_IN_HELICOBACTER_PYLORI_INFECTION [35] | Epithelial cell signaling in Helicobacter pylori infection | 10 | 1.81 e-9  | 8.03 e-9 |
| KEGG_BASE_EXCISION_REPAIR [35]                                       | Base excision repair                                       | 8  | 1.97 e-9  | 8.52 e-9 |
| KEGG_LYSOSOME [121]                                                  | Lysosome                                                   | 12 | 4.47 e-9  | 1.89 e-8 |
| KEGG_ARACHIDONIC_ACID_METABOLISM [58]                                | Arachidonic acid metabolism                                | 9  | 7.28 e-9  | 3.01 e-8 |
| KEGG_NUCLEOTIDE_EXCISION_REPAIR [44]                                 | Nucleotide excision repair                                 | 8  | 1.37 e-8  | 5.54 e-8 |
| KEGG_ETHER_LIPID_METABOLISM [33]                                     | Ether lipid metabolism                                     | 7  | 3.62 e-8  | 1.43 e-7 |
| KEGG_CYTOSOLIC_DNA_SENSING_PATHWAY [55]                              | Cytosolic DNA-sensing pathway                              | 8  | 8.54 e-8  | 3.31 e-7 |
| KEGG_OTHER_GLYCAN_DEGRADATION [16]                                   | Other glycan degradation                                   | 5  | 4.22 e-7  | 1.6 e-6  |
| KEGG_PPAR_SIGNALING_PATHWAY [69]                                     | PPAR signaling pathway                                     | 8  | 5.18 e-7  | 1.93 e-6 |
| KEGG_FC_GAMMA_R_MEDIATED_PHAGOCYTOSIS [96]                           | Fc gamma R-mediated phagocytosis                           | 9  | 6.31 e-7  | 2.3 e-6  |
| KEGG_DRUG_METABOLISM_OTHER_ENZYMES [51]                              | Drug metabolism - other enzymes                            | 7  | 8.39 e-7  | 3 e-6    |
| KEGG_ALPHA_LINOLENIC_ACID_METABOLISM [19]                            | alpha-Linolenic acid metabolism                            | 5  | 1.1 e-6   | 3.85 e-6 |
| KEGG_LIMONENE_AND_PINENE_DEGRADATION [10]                            | Limonene and pinene degradation                            | 4  | 2.11 e-6  | 7.26 e-6 |
| KEGG_NITROGEN_METABOLISM [23]                                        | Nitrogen metabolism                                        | 5  | 3.07 e-6  | 1.02 e-5 |
| KEGG_PROXIMAL_TUBULE_BICARBONATE_RECLAMATION                         | Proximal tubule bicarbonate reclamation                    | 5  | 3.07 e-6  | 1.02 e-5 |
| KEGG_VALINE_LEUCINE_AND_ISOLEUCINE_BIOSYNTHESIS                      | Valine, leucine and isoleucine biosynthesis                | 4  | 3.28 e-6  | 1.07 e-5 |
| KEGG_PEROXISOME [78]                                                 | Peroxisome                                                 | 7  | 1.51 e-5  | 4.85 e-5 |
| KEGG_STEROID_BIOSYNTHESIS [17]                                       | Steroid biosynthesis                                       | 4  | 2.26 e-5  | 7.12 e-5 |
| KEGG_BETA_ALANINE_METABOLISM [22]                                    | beta-Alanine metabolism                                    | 4  | 6.66 e-5  | 2.07 e-4 |
| KEGG_MISMATCH_REPAIR [23]                                            | Mismatch repair                                            | 4  | 8 e-5     | 2.44 e-4 |
| KEGG_INSULIN_SIGNALING_PATHWAY [137]                                 | Insulin signaling pathway                                  | 8  | 8.51 e-5  | 2.55 e-4 |

|                                        |                                          |   |          |          |
|----------------------------------------|------------------------------------------|---|----------|----------|
| KEGG_NICOTINATE_AND_NICOTINAMIDE_METAB | Nicotinate and nicotinamide metabolism   | 4 | 9.53 e-5 | 2.81 e-4 |
| KEGG_VEGF_SIGNALING_PATHWAY [76]       | VEGF signaling pathway                   | 6 | 1.28 e-4 | 3.71 e-4 |
| KEGG_HOMOLOGOUS_RECOMBINATION [28 ]    | Homologous recombination                 | 4 | 1.78 e-4 | 5.01 e-4 |
| KEGG_PENTOSE_AND_GLUCURONATE_INTERCONV | Pentose and glucuronate interconversions | 4 | 1.78 e-4 | 5.01 e-4 |

### Supplementary Table 8. Astrocyte culture-medium composition (Astro-c)

#### General composition of complete Astrocyte growth media

50% Neurobasal

50% DMEM

1mM Sodium Pyruvate

2mM L-glutamine

1 x SATO

5ug/ml NAC

5ng/ml HBEGF

#### A. Neurobasal medium

| Components                                 | Molecular Weight | Concentration (mg/L) | mM          |
|--------------------------------------------|------------------|----------------------|-------------|
| <b>Amino Acids</b>                         |                  |                      |             |
| Glycine                                    | 75               | 30                   | 0.4         |
| L-Alanine                                  | 89               | 2                    | 0.02247191  |
| L-Arginine hydrochloride                   | 211              | 84                   | 0.39810428  |
| L-Asparagine-H <sub>2</sub> O              | 150              | 0.83                 | 0.005533333 |
| L-Cysteine                                 | 121              | 31.5                 | 0.2603306   |
| L-Histidine hydrochloride-H <sub>2</sub> O | 210              | 42                   | 0.2         |
| L-Isoleucine                               | 131              | 105a                 | 0.8015267a  |
| L-Leucine                                  | 131              | 105a                 | 0.8015267a  |
| L-Lysine hydrochloride                     | 183              | 146                  | 0.7978142   |
| L-Methionine                               | 149              | 30                   | 0.20134228  |
| L-Phenylalanine                            | 165              | 66                   | 0.4         |
| L-Proline                                  | 115              | 7.76                 | 0.06747826  |
| L-Serine                                   | 105              | 42                   | 0.4         |
| L-Threonine                                | 119              | 95                   | 0.79831934  |
| L-Tryptophan                               | 204              | 16                   | 0.078431375 |
| L-Tyrosine                                 | 181              | 72                   | 0.39779004  |



|                                                                                 |      |        |             |
|---------------------------------------------------------------------------------|------|--------|-------------|
| L-Valine                                                                        | 117  | 94a    | 0.8034188a  |
| <b>Vitamins</b>                                                                 |      |        |             |
| Choline chloride                                                                | 140  | 4      | 0.028571429 |
| D-Calcium pantothenate                                                          | 477  | 4      | 0.008385744 |
| Folic Acid                                                                      | 441  | 4      | 0.009070295 |
| Niacinamide                                                                     | 122  | 4      | 0.032786883 |
| Pyridoxal hydrochloride                                                         | 204  | 4      | 0.019607844 |
| Riboflavin                                                                      | 376  | 0.4    | 0.00106383  |
| Thiamine hydrochloride                                                          | 337  | 4      | 0.011869436 |
| Vitamin B12                                                                     | 1355 | 0.0068 | 5.02E-06    |
| i-Inositol                                                                      | 180  | 7.2    | 0.04        |
| <b>Inorganic Salts</b>                                                          |      |        |             |
| Calcium Chloride (CaCl <sub>2</sub> ) (anhyd.)                                  | 111  | 200    | 1.8018018   |
| Ferric Nitrate (Fe(NO <sub>3</sub> ) <sub>3</sub> ·9H <sub>2</sub> O)           | 404  | 0.1    | 2.48E-04    |
| Magnesium Chloride (anhydrous)                                                  | 95   | 77.3   | 0.8136842   |
| Potassium Chloride (KCl)                                                        | 75   | 400    | 5.3333335   |
| Sodium Bicarbonate (NaHCO <sub>3</sub> )                                        | 84   | 2200   | 26.190475   |
| Sodium Chloride (NaCl)                                                          | 58   | 3000   | 51.724136   |
| Sodium Phosphate monobasic (NaH <sub>2</sub> PO <sub>4</sub> ·H <sub>2</sub> O) | 138  | 125    | 0.9057971   |
| Zinc sulfate (ZnSO <sub>4</sub> ·7H <sub>2</sub> O)                             | 288  | 0.194  | 6.74E-04    |
| <b>Other Components</b>                                                         |      |        |             |
| D-Glucose (Dextrose)                                                            | 180  | 4500a  | 25a         |
| HEPES                                                                           | 238  | 2600   | 10.92437    |
| Sodium Pyruvate                                                                 | 110  | 25a    | 0.22727273a |

## B. DMEM

| Components                                 | Molecular Weight | Concentration (mg/L) | mM         |
|--------------------------------------------|------------------|----------------------|------------|
| <b>Amino Acids</b>                         |                  |                      |            |
| Glycine                                    | 75               | 30                   | 0.4        |
| L-Arginine hydrochloride                   | 211              | 84                   | 0.39810428 |
| L-Cystine 2HCl                             | 313              | 63                   | 0.20127796 |
| L-Glutamine                                | 146              | 584a                 | 4a         |
| L-Histidine hydrochloride-H <sub>2</sub> O | 210              | 42                   | 0.2        |
| L-Isoleucine                               | 131              | 105a                 | 0.8015267a |
| L-Leucine                                  | 131              | 105a                 | 0.8015267a |
| L-Lysine hydrochloride                     | 183              | 146                  | 0.7978142  |
| L-Methionine                               | 149              | 30                   | 0.20134228 |

|                                                                                 |     |       |             |
|---------------------------------------------------------------------------------|-----|-------|-------------|
| L-Phenylalanine                                                                 | 165 | 66    | 0.4         |
| L-Serine                                                                        | 105 | 42    | 0.4         |
| L-Threonine                                                                     | 119 | 95    | 0.79831934  |
| L-Tryptophan                                                                    | 204 | 16    | 0.078431375 |
| L-Tyrosine disodium salt dihydrate                                              | 261 | 104   | 0.39846742  |
| L-Valine                                                                        | 117 | 94a   | 0.8034188a  |
| <b>Vitamins</b>                                                                 |     |       |             |
| Choline chloride                                                                | 140 | 4     | 0.028571429 |
| D-Calcium pantothenate                                                          | 477 | 4     | 0.008385744 |
| Folic Acid                                                                      | 441 | 4     | 0.009070295 |
| Niacinamide                                                                     | 122 | 4     | 0.032786883 |
| Pyridoxine hydrochloride                                                        | 206 | 4     | 0.019417476 |
| Riboflavin                                                                      | 376 | 0.4   | 0.00106383  |
| Thiamine hydrochloride                                                          | 337 | 4     | 0.011869436 |
| i-Inositol                                                                      | 180 | 7.2   | 0.04        |
| <b>Inorganic Salts</b>                                                          |     |       |             |
| Calcium Chloride (CaCl <sub>2</sub> ) (anhyd.)                                  | 111 | 200   | 1.8018018   |
| Ferric Nitrate (Fe(NO <sub>3</sub> ) <sub>3</sub> ·9H <sub>2</sub> O)           | 404 | 0.1   | 2.48E-04    |
| Magnesium Sulfate (MgSO <sub>4</sub> ) (anhyd.)                                 | 120 | 97.67 | 0.8139166   |
| Potassium Chloride (KCl)                                                        | 75  | 400   | 5.3333335   |
| Sodium Bicarbonate (NaHCO <sub>3</sub> )                                        | 84  | 3700  | 44.04762    |
| Sodium Chloride (NaCl)                                                          | 58  | 6400  | 110.344826  |
| Sodium Phosphate monobasic (NaH <sub>2</sub> PO <sub>4</sub> ·H <sub>2</sub> O) | 138 | 125   | 0.9057971   |
| <b>Other Components</b>                                                         |     |       |             |
| D-Glucose (Dextrose)                                                            | 180 | 4500a | 25a         |

### C. SATO (100X)

|                                                                                       |
|---------------------------------------------------------------------------------------|
| In 80 ml Neurobasal medium                                                            |
| 800 mg transferrin (Sigma T-1147)                                                     |
| 800 mg BSA                                                                            |
| 128 mg putrescine (Sigma P5780)                                                       |
| 20 ul progesterone (Sigma P8783) (from stock: 2.5 mg in 100 ul EtOH) 60 ng/mL (0.2uM) |
| 800 ul sodium selenite (Sigma S5261) (4.0 mg + 10 ul 1N NaOH in 10 mL NB) 40 ng/mL    |
| * Do not reuse progesterone and Na selenite stocks; make fresh each time.             |
| Mix well and filter through pre-rinsed 0.22 um filter.                                |
| Make 200 ul or 800 ul aliquots; store at -20oC                                        |

**Supplementary Table 9. Neuron culture-medium composition (Neuro-c)**

| <b>Components</b>                          | <b>Molecular Weight</b> | <b>Concentration (mg/L)</b> | <b>mM</b>   |
|--------------------------------------------|-------------------------|-----------------------------|-------------|
| <b>Amino Acids</b>                         |                         |                             |             |
| Glycine                                    | 75                      | 30                          | 0.4         |
| L-Alanine                                  | 89                      | 2                           | 0.02247191  |
| L-Arginine hydrochloride                   | 211                     | 84                          | 0.39810428  |
| L-Asparagine-H <sub>2</sub> O              | 150                     | 0.83                        | 0.005533333 |
| L-Cysteine                                 | 121                     | 31.5                        | 0.2603306   |
| L-Histidine hydrochloride-H <sub>2</sub> O | 210                     | 42                          | 0.2         |
| L-Isoleucine                               | 131                     | 105                         | 0.8015267   |
| L-Leucine                                  | 131                     | 105                         | 0.8015267a  |
| L-Lysine hydrochloride                     | 183                     | 146a                        | 0.7978142a  |
| L-Methionine                               | 149                     | 30                          | 0.20134228  |
| L-Phenylalanine                            | 165                     | 66                          | 0.4         |
| L-Proline                                  | 115                     | 7.76                        | 0.06747826  |
| L-Serine                                   | 105                     | 42                          | 0.4         |
| L-Threonine                                | 119                     | 95                          | 0.79831934  |
| L-Tryptophan                               | 204                     | 16                          | 0.078431375 |
| L-Tyrosine                                 | 181                     | 72                          | 0.39779004  |
| L-Valine                                   | 117                     | 94a                         | 0.8034188a  |
| <b>Vitamins</b>                            |                         |                             |             |
| Choline chloride                           | 140                     | 4                           | 0.028571429 |
| D-Calcium pantothenate                     | 477                     | 4                           | 0.008385744 |
| Folic Acid                                 | 441                     | 4                           | 0.009070295 |
| Niacinamide                                | 122                     | 4                           | 0.032786883 |
| Pyridoxal hydrochloride                    | 204                     | 4                           | 0.019607844 |
| Riboflavin                                 | 376                     | 0.4                         | 0.00106383  |
| Thiamine hydrochloride                     | 337                     | 4                           | 0.011869436 |
| Vitamin B12                                | 1355                    | 0.0068                      | 5.02E-06    |
| i-Inositol                                 | 180                     | 7.2                         | 0.04        |

| <b>Inorganic Salts</b>                                                             |     |       |             |
|------------------------------------------------------------------------------------|-----|-------|-------------|
| Calcium Chloride (CaCl <sub>2</sub> )<br>(anhyd.)                                  | 111 | 200   | 1.8018018   |
| Ferric Nitrate<br>(Fe(NO <sub>3</sub> ) <sub>3</sub> ·9H <sub>2</sub> O)           | 404 | 0.1   | 2.48E-04    |
| Magnesium Chloride<br>(anhydrous)                                                  | 95  | 77.3  | 0.8136842   |
| Potassium Chloride (KCl)                                                           | 75  | 400   | 5.3333335   |
| Sodium Bicarbonate<br>(NaHCO <sub>3</sub> )                                        | 84  | 2200  | 26.190475   |
| Sodium Chloride (NaCl)                                                             | 58  | 3000  | 51.724136   |
| Sodium Phosphate<br>monobasic (NaH <sub>2</sub> PO <sub>4</sub> ·H <sub>2</sub> O) | 138 | 125   | 0.9057971   |
| Zinc sulfate (ZnSO <sub>4</sub> ·7H <sub>2</sub> O)                                | 288 | 0.194 | 6.74E-04    |
| <b>Other Components</b>                                                            |     |       |             |
| D-Glucose (Dextrose)                                                               | 180 | 4500a | 25a         |
| HEPES                                                                              | 238 | 2600  | 10.92437    |
| Sodium Pyruvate                                                                    | 110 | 25    | 0.22727273a |
| B27 supplements                                                                    |     |       |             |
| GlutaMAX                                                                           |     |       |             |

**Supplementary Table 10. Complete list of special reagents**

| <b>Antibodies</b>             |                           |            |         |
|-------------------------------|---------------------------|------------|---------|
| PI3 Kinase p85 (phospho Y607) | Abcam                     | ab182651   | WB      |
| PKC $\alpha$ (phospho T638)   | Abcam                     | ab32502    | WB      |
| MAP2                          | Abcam                     | ab5392     | IHC/ICC |
| VGLUT1                        | Abcam                     | ab77822    | IHC/ICC |
| VGAT                          | Abcam                     | ab42939    | IHC/ICC |
| Synapsin 1                    | Abcam                     | ab8        | IHC/ICC |
| TUJ1                          | Abcam                     | ab7751     | IHC/ICC |
| IBA1                          | Abcam                     | ab5076     | IHC/ICC |
| NG2                           | Abcam                     | ab83178    | IHC/ICC |
| NCAN                          | Abcam                     | ab31979    | WB      |
| NFAT1 (phospho S326)          | Affinit                   | AF8011     | WB      |
| Akt                           | Cell Signaling Technology | #9272      | WB      |
| Akt (Phospho T308)            | Cell Signaling Technology | #4056      | WB      |
| Akt (Phospho S473)            | Cell Signaling Technology | #9271      | WB      |
| PI3 Kinase p85                | Cell Signaling Technology | #4292      | WB      |
| $\beta$ -Actin                | Cell Signaling Technology | #4970      | WB      |
| Raptor                        | Cell Signaling Technology | #48648     | WB      |
| Rictor                        | Cell Signaling Technology | #2114      | WB      |
| mTOR                          | Cell Signaling Technology | #2983      | WB      |
| S6K1 (Phospho T389)           | Cell Signaling Technology | #97596     | WB      |
| S6K1                          | Cell Signaling Technology | #2708      | WB      |
| 4E-BP1 (phospho T37/46)       | Cell Signaling Technology | #2855      | WB      |
| 4E-BP1                        | Cell Signaling Technology | #9644      | WB      |
| $\beta$ -Catenin              | Cell Signaling Technology | #9582      | WB      |
| GSK-3 $\beta$                 | Cell Signaling Technology | #9315      | WB      |
| Cleaved Caspase-3             | Cell Signaling Technology | #9661      | WB      |
| NFAT1                         | Cell Signaling Technology | #4389      | WB      |
| GFAP                          | Cell Signaling Technology | #12389     | WB      |
| PKC $\alpha$                  | Cell Signaling Technology | #2056      | WB      |
| O4                            | Merck Millipore           | MAB345     | IHC/ICC |
| Wnt2                          | Proteintech               | 11160-1-AP | WB      |
| FLAG                          | Sigma                     | F3165      | WB      |

|                                          |                   |                |    |
|------------------------------------------|-------------------|----------------|----|
| APOE                                     | ThermoFisher      | PA5-27088      | WB |
| Wnt10a                                   | ThermoFisher      | PA5-20542      | WB |
| Wnt3                                     | ThermoFisher      | 39-0300        | WB |
| Kremen-1                                 | ThermoFisher      | PA5-34520      | WB |
| Wnt7a                                    | ThermoFisher      | PA5-28289      | WB |
| Wnt6                                     | ThermoFisher      | PA5-34326      | WB |
| Wnt5A                                    | ThermoFisher      | MA5-15511      | WB |
| LRP6                                     | ThermoFisher      | PA5-13145      | WB |
| <b>Special Reagents</b>                  |                   |                |    |
| LightCycler® 480 SYBR Green I Master     | Roche             | 4707516001     |    |
| Sodium oxamate                           | Cayman            | 565-73-1       |    |
| BCATci-2                                 | Cayman            | 406191-34-2    |    |
| UK5099                                   | R&D               | 4186           |    |
| Etomoxir sodium salt                     | R&D               | 4539           |    |
| Rapamycin                                | R&D               | 1292           |    |
| Recombinant Human Wnt-3a protein         | R&D               | 5036-WN        |    |
| Recombinant Mouse Wnt-3a protein         | R&D               | 1324-WN        |    |
| Recombinant Human/Mouse Wnt-5a Protein   | R&D               | 645-WN         |    |
| Recombinant Human Wnt6 protein           | Abcam             | ab159813       |    |
| Recombinant human Wnt7a protein          | Abcam             | ab129138       |    |
| Recombinant Mouse Protein Wnt-6 (Wnt6)   | Cusabio           | CSB-MP026140MO |    |
| Recombinant Mouse Protein Wnt-7a (Wnt7a) | Cusabio           | CSB-MP026141MO |    |
| BAPTA                                    | Sigma             | HY-100545      |    |
| L-Glutamine-13C5                         | Sigma             | 605166         |    |
| L-Isoleucine-13C6,15N                    | Sigma             | 608092         |    |
| BPTES                                    | Selleck           | S7753          |    |
| LY294002                                 | Selleck           | S1105          |    |
| MK2206                                   | Selleck           | S1078          |    |
| KU0063794                                | Selleck           | S1226          |    |
| Oligomycin                               | Tocris            | 4110           |    |
| Go6976                                   | Tocris            | 2253           |    |
| Recombinant APOE3                        | Novus Biologicals | 4144-AE-500    |    |
| Recombinant APOE4                        | Novus Biologicals | NBP1-99634     |    |

**Supplementary Table 11. Complete list of primers and plasmids.**

**Plasmid/constructs**

|                                                             |          |             |
|-------------------------------------------------------------|----------|-------------|
| M50 Super 8X TOPflash                                       | Addgene  | #12456      |
| M50 Super 8X FOPflash                                       | Addgene  | #12457      |
| LRP6 Human shRNA Plasmid Kit                                | Origene  | TG311676    |
| Lrp6 Mouse shRNA Plasmid Kit                                | Origene  | TR509944    |
| Lrp6 (NM_008514) Mouse Tagged ORF Clone Lentiviral Particle | Origene  | MR212053L4V |
| Ctnnb1 Mouse shRNA Lentiviral Particle (Locus ID 12387)     | Origene  | TL500280V   |
| Hif1a Mouse shRNA Plasmid Kit                               | Origene  | TL517255    |
| pCMV6-AC-LRP6-GFP                                           | Origene  | RG218918    |
| FLAG-HA-pcDNA3.1                                            | Addgene  | #52535      |
| HRE-luciferase reporter                                     | Addgene  | #26731      |
| pcDNA flag PPAR gamma                                       | Addgene  | #8895       |
| pSynSRE-T-Luc                                               | Addgene  | #60444      |
| pSynSRE-Mut-T-Luc                                           | Addgene  | #60490      |
| pCDNA3-STAT3                                                | Addgene  | #74433      |
| pcDNA3.1 HA-YY1                                             | Addgene  | #104395     |
| pcDNA3-Cyto-GCaMP3                                          | Addgene  | #64853      |
| pGL3-NFAT luciferase reporter                               | Addgene  | #17870      |
| PPRE X 3-TK-Luc                                             | Addgene  | #1015       |
| STAT3 Reporter Kit                                          | Addgene  | #79730      |
| YY1 Luciferase reporter                                     | Panomics | LR0090      |
| pCMV6-AC-NFATC1-GFP                                         | Origene  | PS100010    |
| HA-HIF1alpha-pcDNA3                                         | Addgene  | #18949      |
| pcDNA3.1-2xFLAG-SREBP-1a                                    | Addgene  | Addgene     |

**qPCR primers**

**Wnt signalling genes**

| Genebank accession | Gene symbol | Forward Primer (5' to 3') | Reverse Primer (5' to 3') |
|--------------------|-------------|---------------------------|---------------------------|
| NM_001130          | <i>Aes</i>  | ACCCCAGCAACTCAAATTCAC     | AAGCCGTAGGACATCTCGTAG     |

|           |                 |                             |                             |
|-----------|-----------------|-----------------------------|-----------------------------|
| NM_000038 | <i>Apc</i>      | AAAATGTCCCTCCGTTCTTATG<br>G | CTGAAGTTGAGCGTAATACCA<br>GT |
| NM_003502 | <i>Axin1</i>    | GGTTTCCCCTTGGACCTCG         | CCGTCGAAGTCTCACCTTTAAT<br>G |
| NM_004655 | <i>Axin2</i>    | TACTCTCTTATTGGGCGATCA       | TTGGCTACTCGTAAAGTTTTG<br>GT |
| NM_004326 | <i>Bcl9</i>     | AGGGAGCGAAGTATTTCCGC        | GGGTCATCGAGTGTGGTGT         |
| NM_033637 | <i>Btrc</i>     | CCAGACTCTGCTTAAACCAAG<br>AA | GGGCACAATCATACTGGAAGT<br>G  |
| NM_053056 | <i>Ccnd1</i>    | GCTGCGAAGTGGAACCATC         | CCTCCTTCTGCACACATTTGAA      |
| NM_001759 | <i>Ccnd2</i>    | ACCTTCCGCAGTGCTCCTA         | CCCAGCCAAGAAACGGTCC         |
| NM_001892 | <i>Csnk1a1</i>  | AGTGGCAGTGAAGCTAGAATC<br>T  | CGCCCAATACCCATTAGGAAG<br>TT |
| NM_001895 | <i>Csnk2a1</i>  | CGAGTTGCTTCCCGATACTTC       | ACTTGCCAGCATACAACCCAA       |
| NM_001328 | <i>Ctbp1</i>    | CGACCCTTACTTGTCGGATGG       | TTGACGGTGAAGTCGTTGATG       |
| NM_001904 | <i>Ctnnb1</i>   | CATCTACACAGTTTGATGCTGC<br>T | GCAGTTTTGTCAGTTCAGGGA       |
| NM_020248 | <i>Ctnnbip1</i> | CCTATGCAGGGGTGGTCAAC        | CGACCTGGAAAACGCCATCA        |
| NM_025212 | <i>Cxxc4</i>    | ATGCACCACCGAAACGACTC        | GCAGTGTTCAGGGGATAAGG<br>T   |
| NM_014992 | <i>Daam1</i>    | ACCAGATTCATCGACTTGGAT<br>GG | CGGCCTTGAGAGTTGTTCATT<br>A  |
| NM_001343 | <i>Dab2</i>     | GTAGAAACAAGTGCAACCAAT<br>GG | GCCTTTGAACCTTGCTAAGAG<br>A  |
| NM_033425 | <i>Dixdc1</i>   | GTGCAAAGAGCGAGTCCATTA       | GGTCTCCAGATAGGTTCCAGG       |
| NM_012242 | <i>Dkk1</i>     | CCTTGAACTCGGTTCTCAATTC<br>C | CAATGGTCTGGTACTTATTCCC<br>G |
| NM_015881 | <i>Dkk3</i>     | ATGTGTGCAAGCCGACCTT         | CCTCAGCGCCATCTCTTCA         |
| NM_004421 | <i>Dvl1</i>     | GAGGGTGCTCACTCGGATG         | GTGCCTGTCTCGTTGTCCA         |
| NM_004422 | <i>Dvl2</i>     | GAGGAAGAGACTCCCTACCTG       | CGGGCGTTGTCATCTGAAAT        |
| NM_001429 | <i>Ep300</i>    | AGCCAAGCGGCCTAAACTC         | TCACCACCATTGGTTAGTCCC       |
| NM_012300 | <i>Fbxw11</i>   | AAGCTGATTGAACGAATGGTA<br>CG | CCACACCGCCAGTTAGATTCT<br>AT |
| NM_022039 | <i>Fbxw4</i>    | GTGCTTACACACCATCCAGAC       | ACTGTTGAGGTCCCAGATTCT       |
| NM_002007 | <i>Fgf4</i>     | CTCGCCCTTCTCACCGATG         | GTAGGACTCGTAGGCGTTGTA       |
| NM_005438 | <i>Fosl1</i>    | CAGGCGGAGACTGACAAACTG       | TCCTTCCGGGATTTTGCAGAT       |
| NM_003593 | <i>Foxn1</i>    | CTGCTCGTCATTTGTGTCCGA       | AGCCAAAGCCAGGATACTTGT       |
| NM_005479 | <i>Frat1</i>    | GGTCCCAACCAGAAACCCG         | GGGGAAGCTTTGCACGTAAC        |
| NM_001463 | <i>Frzb</i>     | TGGAACATGACTAAGATGCC<br>A   | ACACAGACTTACAGGGCTTGA<br>T  |
| NM_003505 | <i>Fzd1</i>     | ATCGAAGCCAACACAGTATT<br>T   | CACGTTGTTAAGCCCCACG         |
| NM_001466 | <i>Fzd2</i>     | GTGCCATCCTATCTCAGCTACA      | CTGCATGTCTACCAAGTACGT<br>G  |



|              |                 |                             |                              |
|--------------|-----------------|-----------------------------|------------------------------|
| NM_017412    | <i>Fzd3</i>     | G TTCATGGGGCATATAGGTGG      | GCTGCTGTCTGTTGGTCATAA        |
| NM_012193    | <i>Fzd4</i>     | CCTCGGCTACAACGTGACC         | TGCACATTGGCACATAAACAG<br>A   |
| NM_003468    | <i>Fzd5</i>     | CATGCCCAACCAGTTCAACC        | CGGCGAGCATTGGATCTCC          |
| NM_003506    | <i>Fzd6</i>     | ATGGCCTACAACATGACGTTT       | GTTTACGACAAGGTGGAACCA        |
| NM_003507    | <i>Fzd7</i>     | GTGCCAACGGCCTGATGTA         | AGGTGAGAACGGTAAAGAGC<br>G    |
| NM_031866    | <i>Fzd8</i>     | ATCGGCTACAACCTACCTACA       | GTACATGCTGCACAGGAAGA<br>A    |
| NM_003508    | <i>Fzd9</i>     | TGCGAGAACCCCGAGAAGT         | GGGACCAGAACACCTCGAC          |
| NM_019884    | <i>Gsk3a</i>    | GGAAAGGCATCTGTCGGGG         | GAGTGGCTACGACTGTGGTC         |
| NM_002093    | <i>Gsk3b</i>    | GGCAGCATGAAAGTTAGCAGA       | GGCGACCAGTTCTCCTGAATC        |
| NM_002228    | <i>Jun</i>      | TCCAAGTGCCGAAAAGGAAG        | CGAGTTCTGAGCTTTCAAGGT        |
| NM_001039570 | <i>Kremen1</i>  | CCCGAGTGTTTCACAGCCAAT       | GGATGCTGGAAAGTCTCGTTC        |
| NM_016269    | <i>Lef1</i>     | TGCCAAATATGAATAACGACC<br>CA | GAGAAAAGTGCTCGTCACTGT        |
| NM_002335    | <i>Lrp5</i>     | TGGCCCCGAAACCTCTACTG        | GCACACTCGATTTTAGGGTTC<br>T   |
| NM_002336    | <i>Lrp6</i>     | ACGATTGTAGTTGGAGGCTTG       | ATGGCTTCTTCGCTGACATCA        |
| NM_002750    | <i>Mapk8</i>    | TGTGTGGAATCAAGCACCTTC       | AGGCGTCATCATAAAACCTCGT<br>TC |
| NM_002423    | <i>Mmp7</i>     | GAGTGAGCTACAGTGGGAACA       | CTATGACGCGGGAGTTTAACA<br>T   |
| NM_002467    | <i>Myc</i>      | GGCTCCTGGCAAAGGTCA          | CTGCGTAGTTGTGCTGATGT         |
| NM_172390    | <i>Nfatc1</i>   | CACCGCATCACAGGGAAGAC        | GCACAGTCAATGACGGCTC          |
| NM_033119    | <i>Nkd1</i>     | GGGAAACTTCACTCCAAGCC        | CTCCCGATCCACTCCTCGAT         |
| NM_016231    | <i>Nlk</i>      | CCAACCTCCACACATTGACTAT<br>T | ACTTTGACATGATCTGAGCTG<br>AG  |
| NM_000325    | <i>Pitx2</i>    | CGGCAGCGGACTCACTTTA         | GTTGGTCCACACAGCGATTT         |
| NM_022825    | <i>Porcn</i>    | CGAGGGGCACAGATGATTGT        | AAGTAGAGGTAGCCCATGAA<br>CT   |
| NM_006238    | <i>Ppard</i>    | CAGGGCTGACTGCAAACGA         | CTGCCACAATGTCTCGATGTC        |
| NM_153026    | <i>Prickle1</i> | GCTGCCTTGAGTGTGAAACG        | TGCCCGTCATAGGTCATCTGT        |
| NM_015617    | <i>Pygo1</i>    | CAGCTCCCCTTACAAAGTTT        | GGTCCCTGTGATTTGCCTTG         |
| NM_001664    | <i>Rhoa</i>     | GGAAAGCAGGTAGAGTTGGCT       | GGCTGTCGATGGAAAACAC<br>AT    |
| NM_021205    | <i>Rhou</i>     | GCTACCCCACCGAGTACATC        | GGCTCACGACACTGAAGC           |
| NM_003707    | <i>Ruvbl1</i>   | AGGTGAAGAGCACTACGAAG<br>A   | CTACTATGACGCCACATGCCT        |
| NM_003012    | <i>Sfrp1</i>    | ACGTGGGCTACAAGAAGATGG       | CAGCGACACGGGTAGATGG          |
| NM_003014    | <i>Sfrp4</i>    | CCTGGAACATCACGCGGAT         | CGGCTTGATAGGGTTCGTGC         |
| NM_022454    | <i>Sox17</i>    | GTGGACCGCACGGAATTTG         | GGAGATTCACACCGGAGTCA         |
| NM_003202    | <i>Tcf7</i>     | TTGATGCTAGGTTCTGGTGTAC      | CCTTGGACTCTGCTTGTGTC         |

|           |               | C                          |                            |
|-----------|---------------|----------------------------|----------------------------|
| NM_031283 | <i>Tcf7l1</i> | TCGTCCCTGGTCAACGAGT        | ACTTCGGCGAAATAGTCCCG       |
| NM_005077 | <i>Tle1</i>   | GAGTCCCTGGACCGGATTA        | AATACATCACATAGTGCCTCT<br>G |
| NM_020335 | <i>Vangl2</i> | ACCGCTCTAAGAGTCGAGATG      | GTTACTACTGTCGTCGTTTCCC     |
| NM_007191 | <i>Wif1</i>   | TCTCAAACACCTCAAATGCT       | GACACTCGCAGATGCGTCT        |
| NM_003882 | <i>Wisp1</i>  | CCAGCCTAACTGCAAGTACAA      | GGCGTCGTCTCACATACC         |
| NM_005430 | <i>Wnt1</i>   | CGATGGTGGGGTATTGTGAAC      | CCGGATTTTGGCGTATCAGAC      |
| NM_025216 | <i>Wnt10a</i> | GGTCAGCACCCAATGACATTC      | TGGATGGCGATCTGGATGC        |
| NM_004626 | <i>Wnt11</i>  | GGAGTCGGCCTTCGTGTATG       | GCCCGTAGCTGAGGTTGTC        |
| NM_057168 | <i>Wnt16</i>  | AGTATGGCATGTGGTTCAGCA      | GCGGCAGTCTACTGACATCAA      |
| NM_003391 | <i>Wnt2</i>   | GATGCGTGCCATTAGCCAG        | AGATTCGGACTACTTCGGAG       |
| NM_004185 | <i>Wnt2b</i>  | CGGGACCACACCGTCTTTG        | GCGAGTAATAGCGTGGACTA<br>C  |
| NM_030753 | <i>Wnt3</i>   | AGGGCACCTCCACCATTTG        | GACACTAACCGCCGAAGTCA       |
| NM_033131 | <i>Wnt3a</i>  | TGACACGCTCATGTGCAGAA       | CGAGACACCATCCCACCAAA       |
| NM_030761 | <i>Wnt4</i>   | GTACGCCATCTCTTCGGCAG       | GCGATGTTGTCAGAGCATCCT      |
| NM_003392 | <i>Wnt5a</i>  | ATTCTTGGTGGTCGCTAGGTA      | CGCCTTCTCCGATGTA           |
| NM_032642 | <i>Wnt5b</i>  | CGCTTCGCCAAGGAGTTTG        | TGCCATCTTATACACAGCCCT      |
| NM_006522 | <i>Wnt6</i>   | GGTGCAGAGAGTCCAGTTC        | CGTCTCCGAATGTCTGTT         |
| NM_004625 | <i>Wnt7a</i>  | CTGTGGCTGCGACAAAGAGAA      | GCCGTGGCACTTACATTCC        |
| NM_058238 | <i>Wnt7b</i>  | GAAGCAGGGCTACTACAACCA      | CGGCCTCATTGTTATGCAGGT      |
| NM_058244 | <i>Wnt8a</i>  | GAAGTGCCTGAAAATGCTCT       | TCGAAGTACCCATGCTACAG       |
| NM_003395 | <i>Wnt9a</i>  | GGCAAGCATCTGAAGCACAAG      | GCAGAAGCTAGGCGAGTCA        |
| NM_001101 | <i>Actb</i>   | CATGTACGTTGCTATCCAGGC      | CTCCTTAATGTCACGCACGAT      |
| NM_004048 | <i>B2m</i>    | GAGGCTATCCAGCGTACTCCA      | CGGCAGGCATACTCATCTTTT      |
| NM_002046 | <i>Gapdh</i>  | ACAACCTTGGTATCGTGGAAG<br>G | GCCATCACGCCACAGTTTC        |
| NM_000194 | <i>Hprt1</i>  | CCTGGCGTCGTGATTAGTGAT      | AGACGTTCAAGTCTGTCCATA<br>A |
| NM_001002 | <i>Rplp0</i>  | AGCCCAGAACACTGGTCTC        | ACTCAGGATTTCAATGGTGCC      |

### Mouse KEGG pathway genes

| Genebank accession | Gene symbol  | Forward Primer (5' to 3') | Reverse Primer (5' to 3')   |
|--------------------|--------------|---------------------------|-----------------------------|
| NM_030210          | <i>Aacs</i>  | GGGAGCCTGACAGCAAGAAG      | CGGACAGACCAGTGGTATAAG<br>TC |
| NM_011834          | <i>Aadat</i> | ATGAATTA                  | AACATGCTCGGGTTTGGAGAT<br>C  |
| NM_009591          | <i>Aanat</i> | TGAGCGGGAAGCCTTATCTC      | CTCCTGAGTAAGTCTCTCCTTG<br>T |
| NM_173765          | <i>Aasdh</i> | TCGGACTGCCTCTGTCTATATG    | GGGTAAGTTTATCCCAGGTTG       |

|              |                 |                             |                                 |
|--------------|-----------------|-----------------------------|---------------------------------|
|              |                 |                             | AC                              |
| NM_026276    | <i>Aasdhppt</i> | TTCCCCGCTAAGAGGCTGT         | GCATCGCCAGAAGCCATTC             |
| NM_013930    | <i>Aass</i>     | GGCATCACCAAACCTGGGCTA       | GTGTGGGAAAAGAAGGCGTA<br>T       |
| NM_001170978 | <i>Abat</i>     | CTGAACACAATCCAGAATGCA<br>GA | GGTTGTAACCTATGGGCACAG           |
| NM_013454    | <i>Abca1</i>    | GCTTGTGGCCTCAGTTAAGG        | GTAGCTCAGGCGTACAGAGAT           |
| NM_021022    | <i>Abcb11</i>   | TCTGACTCAGTGATTCTTCGCA      | CCCATAAACATCAGCCAGTTGT          |
| NM_031884    | <i>Abcg5</i>    | AGGGCCTCACATCAACAGAG        | GCTGACGCTGTAGGACACAT            |
| NM_026180    | <i>Abcg8</i>    | CTGTGGAATGGGACTGTACTT<br>C  | GTTGGACTGACCACTGTAGGT           |
| NM_177470    | <i>Acaa2</i>    | CTGCTACGAGGTGTGTTTCATC      | AGCTCTGCATGACATTGCC             |
| NM_133360    | <i>Acaca</i>    | ATGGGCGGAATGGTCTCTTTC       | TGGGGACCTTGTCTTCATCAT           |
| NM_133904    | <i>Acacb</i>    | CGCTCACCAACAGTAAGGTGG       | GCTTGGCAGGGAGTTCCTC             |
| NM_025862    | <i>Acad8</i>    | ACCTGCTTCAGCGACTAGC         | TCAGCCCTTTGGTCTACTTCA           |
| NM_007381    | <i>Acadl</i>    | TCTTTTCCTCGGAGCATGACA       | GACCTCTACTCACTTCTCCA<br>G       |
| NM_007382    | <i>Acadm</i>    | AGGGTTTAGTTTTGAGTTGAC<br>GG | CCCCGCTTTTGTATATTCCG            |
| NM_007383    | <i>Acads</i>    | TGGCGACGGTTACACACTG         | GTAGGCCAGGTAATCCAAGCC           |
| NM_025826    | <i>Acadsb</i>   | CCCAACCTGCTTGTCTCCTTG       | ATCCCTGGATCACCGATTCT            |
| NM_017366    | <i>Acadvl</i>   | CTACTGTGCTTCAGGGACAAC       | CAAAGGACTTCGATTCTGCCC           |
| NM_144784    | <i>Acat1</i>    | CAGGAAGTAAGATGCCTGGAA<br>C  | TTCACCCCTTGATGACATT             |
| NM_009338    | <i>Acat2</i>    | CCCGTGGTCATCGTCTCAG         | GGACAGGGCACCATTGAAGG            |
| NM_175731    | <i>Acer1</i>    | TCTGAGGTGGATTGGTGTGAG       | TGAGGGGTCAAAGATGAGG<br>A        |
| NM_139306    | <i>Acer2</i>    | TGTGGCATATTCTCATCTGCCT      | CAATAAAAGCCCATTCTCGCT<br>G      |
| NM_025408    | <i>Acer3</i>    | TGTGATTCACTGAGGAACCTTC<br>G | AGAAACTTCACTTTGGCCTGT<br>A      |
| NM_009599    | <i>Ache</i>     | CTCCCTGGTATCCCCTGCATA       | GGATGCCAGAAAAGCTGAGA            |
| NM_134037    | <i>Acly</i>     | CAGCCAAGGCAATTCAGAGC        | CTCGACGTTTGATTAAGTGGT<br>C<br>T |
| NM_001033041 | <i>Acmsd</i>    | CTACCAAAGGAATGGCCCGAT       | GTGGAAAGAGCTTGGACTGTC           |
| NM_007386    | <i>Aco1</i>     | AGAACCATTTCACACCTTG         | AGCGTCCGTATCTTGAGTCCT           |
| NM_080633    | <i>Aco2</i>     | ATCGAGCGGGAAAGACATAC        | TGATGGTACAGCCACCTTAGG           |
| NM_012006    | <i>Acot1</i>    | ATACCCCTGTGACTATCCTGA       | CAAACACTCACTACCAACTGT           |
| NM_028790    | <i>Acot12</i>   | GTTTGAGGACACAGCGAGAAT       | GAAGCAGGACAGGTTTTAAGT<br>GA     |
| NM_134188    | <i>Acot2</i>    | GTTGTGCCAACAGGATTGGAA       | GCTCAGCGTCGCATTTGTC             |
| NM_134247    | <i>Acot4</i>    | AGCAGTGCGGTACATGCTTC        | AGAGCCATTGATGGAAACTGT<br>G      |

|              |               |                         |                         |
|--------------|---------------|-------------------------|-------------------------|
| NM_001146057 | <i>Acot7</i>  | TAGCCTTTTCGAGCCTGACG    | TTGGCATCATCTGGACGCAT    |
| NM_015729    | <i>Acox1</i>  | TAACTCCTCACTCGAAGCCA    | AGTTCCATGACCCATCTCTGTC  |
| NM_030721    | <i>Acox3</i>  | ACCGGAAGAAAAAGACAGTGC   | GAGGCTCTTGCTCGGTAGG     |
| NM_007981    | <i>Acs1</i>   | TGCCAGAGCTGATTGACATTC   | GGCATACCAGAAGGTGGTGAG   |
| NM_028817    | <i>Acs3</i>   | AACCACGTATCTTCAACACCATC | AGTCCGGTTTGGAACTGACAG   |
| NM_019477    | <i>Acs4</i>   | CTCACCATTATATTGCTGCCTGT | TCTCTTTGCCATAGCGTTTTTCT |
| NM_027976    | <i>Acs5</i>   | TCCTGACGTTTGGAAACGGC    | CTCCCTCAATCCCCACAGAC    |
| NM_001033599 | <i>Acs6</i>   | AAGTGACAGAGAGTCAGTGGG   | TAGGGCGGAGAGCCTTCAT     |
| NM_054094    | <i>Acsm1</i>  | TCTGCAAAGTCTTACAGGGCT   | TCCTCAGGTGAATCATGGTCA   |
| NM_212442    | <i>Acsm3</i>  | CTTTGGCCCCAGCAGTAGATG   | GGCTGTCACTGGCATATTTTCAT |
| NM_178758    | <i>Acsm5</i>  | CCGATCCCTGAGGTGGTAG     | GGTGCCCTGTCTTTTCCAG     |
| NM_080575    | <i>Acss1</i>  | GTTTGGGACACTCCTTACCATAC | AGGCAGTTGACAGACACATTC   |
| NM_019811    | <i>Acss2</i>  | AAACACGCTCAGGGAAAATCA   | ACCGTAGATGTATCCCCCAGG   |
| NM_198636    | <i>Acss3</i>  | AATGTGCGAAAGTAACAGGGC   | GTGGGTCTGTACTCACCACC    |
| NM_025371    | <i>Acy1</i>   | CAACCCAATCCAGACTATGGAGG | GTGGGAGTTTAGCAAGATGGAG  |
| NM_027857    | <i>Acy3</i>   | GCACCCACGGGAATGAGATG    | GAGCGGTTGAGATCACGGTC    |
| NM_025421    | <i>Acyp1</i>  | AAAGGTTCAAGGGGTGTTTTTCC | CATGGTAGGGGAGAACGGACT   |
| NM_029344    | <i>Acyp2</i>  | TGCTCAAGTCTGTGGACTACG   | GAGAACTAGGACTCCCAACCTT  |
| NM_007398    | <i>Ada</i>    | ACCCGCATTCAACAAACCCA    | AGGGCGATGCCTCTCTTCT     |
| NM_009622    | <i>Adcy1</i>  | GTCACCTTCGTGTCTATGCC    | TTCACACCAAAGAAGAGCAGG   |
| NM_173029    | <i>Adcy10</i> | AAGCTCATCCGCTCTATGCC    | CCAAGCGTGATGTAGGTGGT    |
| NM_153534    | <i>Adcy2</i>  | GACTGGCTCTACGATCCTAC    | GGGCAGTGGGAACGGTTAT     |
| NM_001159537 | <i>Adcy3</i>  | CTCGTTTATGCGGCTGAC      | ACATCACTACCACGTAGCAGT   |
| NM_080435    | <i>Adcy4</i>  | AGTACCCACTGCTGATACTGC   | AGCCACCCAAAGCACACAG     |
| NM_001012765 | <i>Adcy5</i>  | CTTGGGGAGAAGCCGATTCC    | ACCGCTTAGTGGAGGGTCT     |
| NM_007405    | <i>Adcy6</i>  | GATGAACGGAAAACAGCTTGGG  | GGTGGCTCCGCATTCTTGA     |
| NM_001109756 | <i>Adcy7</i>  | AAGGGGCGCTACTTCTAAAT    | GTGTCTGCGGAGATCCTCA     |
| NM_009623    | <i>Adcy8</i>  | CTCTACACCATCCAACCGACG   | GCACCGAGTCGCTAGACAG     |
| NM_009624    | <i>Adcy9</i>  | CAACAGCGTGAGGGTCAAGAT   | CATGGAGTCGAATTTGGGGTC   |
| NM_011996    | <i>Adh4</i>   | TGGCAGTCCCCTTGCATT      | ACTACCGGGAAGAGAGCTTTC   |
| NM_007410    | <i>Adh5</i>   | AGTTCGGATTAAGATCCTTGCCA | ACTTTCCACAATTCCAGCACC   |
| NM_009626    | <i>Adh7</i>   | ATGGGCACCGCTGGAAAAG     | TAACACGGACTTCTTAGCCT    |

|              |                 |                             |                             |
|--------------|-----------------|-----------------------------|-----------------------------|
| NM_134052    | <i>Adi1</i>     | CACGCTCGGAGTGCTCTATTG       | AGGATGTAGCGGATCTCCTCA       |
| NM_134079    | <i>Adk</i>      | AGAGTCGGTATTGAAAGTGGC<br>T  | CTAAAGCAACTCACCGTCTCAT      |
| NM_009634    | <i>Adsl</i>     | AGCCGCGAGATGTGTTTCTT        | TCAATGTTGTTTCAGGTTGACT<br>T |
| NM_009634    | <i>Adsl</i>     | AGCCGCGAGATGTGTTTCTT        | TCAATGTTGTTTCAGGTTGACT<br>T |
| NM_007422    | <i>Adss</i>     | ACACGGGGTAGAGAATTTGGA       | GGTAAGGGCCAACGCAGTA         |
| NM_007421    | <i>Adssl1</i>   | CTCACCTTGTGTTGACTTCC        | AGCAAAGCCCTTGAGCCTTTT       |
| NM_027827    | <i>Afmid</i>    | AAAGATTGGCAGTGCCTAGAT<br>G  | TCCAGCCAGGGTTATACAGTG       |
| NM_023538    | <i>Agk</i>      | CTCATTCTCCAATGCACAA         | TCCATGCCAGACAGGTGTAAA       |
| NM_001081326 | <i>AgI</i>      | GTCCACAGATCGACCGAAACA       | GTGCCACAGTTGAAGCGATTT       |
| NM_001081408 | <i>Agmat</i>    | AGTGGTACAGATAGGCATCCG       | AGGGGGACCAGTGACTTCAT        |
| NM_001163379 | <i>Agpat1</i>   | TAAGATGGCCTTCTACAACGG<br>C  | CCATACAGGTATTTGACGTGG<br>AG |
| NM_026212    | <i>Agpat2</i>   | CAGCCAGGTTCTACGCCAAG        | TGATGCTCATGTTATCCACGGT      |
| NM_053014    | <i>Agpat3</i>   | CTGCTTGCTACTCGAAGACC        | GATACGGCGGTATAGGTGCTT       |
| NM_026644    | <i>Agpat4</i>   | CCAGTTTCTATGTCACCTGGTC      | GCAGAGTCTGGCATTGATCTT<br>G  |
| NM_172666    | <i>Agps</i>     | AATGGATGGGGCTACAATGAT<br>TC | TCCAGACTTACTCCAAGGGTG       |
| NM_016702    | <i>Agxt</i>     | AAGCCCCTGTCAGTTCCTAC        | TCCTCCATGATCTGAAGCATCT      |
| NM_001031851 | <i>Agxt2</i>    | TCACCTGAGAAATACCAGTCCC      | CAAAGAGCCACTCCATGTGTC       |
| NM_016661    | <i>Ahcy</i>     | GGACCGCTACTGGCTAAAGAA       | GCAGGAAGTGAACCCCAACA        |
| NM_145542    | <i>Ahcyl1</i>   | TCGAGGACGCCGAGAAGTA         | GGGAATTTGGTGAACCTTTGC<br>AT |
| NM_001171001 | <i>Ahcyl2</i>   | TTCAACAAACGTCCCACCAAA       | GGATGTCTCATCGTCAGAGCT<br>AT |
| NM_001198792 | <i>Ak1</i>      | GCTGCTGTGTGTCTAGTGAAC       | CCTCTCCGATCCAGAGCTGA        |
| NM_001033966 | <i>Ak2</i>      | GGCTTCCGAACCGGAGATTC        | CAGACACAAAAGTTTTAGCC<br>AG  |
| NM_021299    | <i>Ak3</i>      | GTGTCGTCACGCATCACCAA        | GCCAACACACCGATTTCTGT        |
| NM_001081277 | <i>Ak5</i>      | AGAAGCAAAGTATCCGTGAC        | CTTCGTCCAAACTTTTCCCCTT      |
| NM_030187    | <i>Ak7</i>      | CAGCAAAAATACCGGCCCTG        | TTCTCCACGAAGCCTGTTTGG       |
| NM_021473    | <i>Akr1a1</i>   | AGCCTGGTCAGGTGAAAGC         | GGCCTCCCAATCTCAGTT          |
| NM_172398    | <i>Akr1b10</i>  | CTAGTGCCAAACCAGAGGACC       | TCCTGTATTGAGAAGGTGTC<br>A   |
| NM_030611    | <i>Akr1c1</i>   | GGACTAGCCATCCGAAGCAA        | AGACCCGTACGAGTTCTGGA        |
| NM_145364    | <i>Akr1d1</i>   | TGCACACCACCAATATCCCT        | CTTCACTGCCACATAGGTCTTC      |
| NM_020559    | <i>Alas1</i>    | TCGCCGATGCCATTCTTATC        | GGCCCCAACTTCCATCATCT        |
| NM_009653    | <i>Alas2</i>    | GCAGGGCAACAGGACTTTG         | ACAGGACCGTAGCAACATAGC       |
| NM_153554    | <i>Aldh18a1</i> | GTCCAGCCCTCAGCTATTAGA       | CTTCAGCTCACTTCGGTGGG        |

|              |                |                             |                              |
|--------------|----------------|-----------------------------|------------------------------|
| NM_053080    | <i>Aldh1a3</i> | GGGTCACACTGGAGCTAGGA        | CTGGCCTCTTCTTGCGAA           |
| NM_028270    | <i>Aldh1b1</i> | CTCCAGGGCAGGACTACCTC        | CATGCCACTCGTTGTTGATGA        |
| NM_009656    | <i>Aldh2</i>   | GACGCCGTGAGCAGGAAAA         | CGCCAATCGGTACAACAGC          |
| NM_007437    | <i>Aldh3a2</i> | GCGGAGGATGGTGCAAGAG         | CATTGAGTTCACTTTTGCTCAG<br>G  |
| NM_026316    | <i>Aldh3b1</i> | ATGGACTCGTTTGAAGACAAG<br>C  | GATGGCAATCTCAGACACCTC        |
| NM_001177438 | <i>Aldh3b2</i> | TTTGGAGGCAACGATGGCTT        | CAGGGACCATAAGGCGGGTA         |
| NM_175438    | <i>Aldh4a1</i> | CGATGGAAGCACACCTCTTCT       | GGCGACAACCTGGTACTGTATA<br>TC |
| NM_172532    | <i>Aldh5a1</i> | CGGTCAAGGAGAGGAGCTTAC       | GGACTAGCCCTCGTTATCTTT        |
| NM_134042    | <i>Aldh6a1</i> | AGCCGTTGAGTCCTGCAAAC        | TCCCTTGTTCCAGTGTGATTAA<br>C  |
| NM_138600    | <i>Aldh7a1</i> | TGCTGATCCATCATCCCCAGT       | TGTTAGCAGGACAATAGGTGCG<br>T  |
| NM_019993    | <i>Aldh9a1</i> | GGCCGAGTGATTGCCACTT         | AGGCCACTTTTCTTACTCCAGA       |
| NM_001177308 | <i>Aldoa</i>   | CGTGTGAATCCCTGCATTGG        | CAGCCCCTGGGTAGTTGTC          |
| NM_144903    | <i>Aldob</i>   | GAAACCGCCTGCAAAGGATAA       | GAGGGTCTCGTGAAAAGGAT         |
| NM_009657    | <i>Aldoc</i>   | AGAAGGAGTTGTCGGATATTG<br>CT | TTCTCCACCCCAATTTGGCTC        |
| NM_053156    | <i>Allc</i>    | TCTGAGTGCCTGGGAGGAAA        | AATGCCCTGTATCCCCAGTTG        |
| NM_007440    | <i>Alox12</i>  | GTTCCACACATCCGTTACT         | CCGAGTAAGCAACTGAACATG<br>G   |
| NM_009659    | <i>Alox12b</i> | GGGGACGCTGGATTCAATTTT       | GGCACTGTACCGTGTAGTCAT        |
| NM_009660    | <i>Alox15</i>  | GGCTCCAACAACGAGGTCTAC       | AGGTATTCTGACACATCCACCT<br>T  |
| NM_009662    | <i>Alox5</i>   | ACTACATCTACCTCAGCCTCAT<br>T | GGTGACATCGTAGGAGTCCAC        |
| NM_009665    | <i>Amd1</i>    | AGGGATCTGGGGATCTTCGTA       | TGCTTGTCAGTCTTTGTACAC        |
| NM_027908    | <i>Amdhd1</i>  | GTGGGCGGGTGAAAGAGTC         | GGAGCAGAACAGTTCCTCCTC        |
| NM_172935    | <i>Amdhd2</i>  | GATGTGCAGATCAACGGTGGA       | CCTTGATAAACCTCTGGTGG         |
| NM_001033303 | <i>Ampd1</i>   | GATGCAATGCGTAGCTTTGCT       | CCTGGAAACGCCTTTTTCTCC        |
| NM_028779    | <i>Ampd2</i>   | CCTCTCCGCTACAGTCTGC         | CTCCTTGCAATTTGCCATCCAT       |
| NM_009667    | <i>Ampd3</i>   | GTTGGCGGAGAAGGTGTTTG        | CTGCGACCGGATCATCTTGAA        |
| NM_001013814 | <i>Amt</i>     | CAGGCACAACCCTTGGTCC         | TGCAGGTGTGAATCAACATGA<br>C   |
| NM_013913    | <i>Angptl3</i> | GAGGAGCAGCTAACCAACTTA<br>AT | TCTGCATGTGCTGTTGACTTAA<br>T  |
| NM_020581    | <i>Angptl4</i> | CATCTGGGACGAGATGAACT        | TGACAAGCGTTACCACAGGC         |
| NM_178932    | <i>Aoc2</i>    | CGAGAGGCACTAGCCATCATC       | GCGCCGATAATAGGGCAGG          |
| NM_009675    | <i>Aoc3</i>    | GAAGACCACCCTAGTGCTCCT       | ATGAAGAGGTTGGCTCAGTCC        |
| NM_009676    | <i>Aox1</i>    | GAGGAAGAATCTCCGACTCAC<br>A  | TGGTGACTGCTGTACCATGTA<br>G   |

|              |               |                             |                             |
|--------------|---------------|-----------------------------|-----------------------------|
| NM_019735    | <i>Apip</i>   | CAAGGAGCACCCCGATTC          | TTGCCATGCTTCAAGCTGATT       |
| NM_013474    | <i>Apoa2</i>  | TGGTCGCACTGCTGGTAAC         | TTTGCCATATTCAGTCATGCTC<br>T |
| NM_007468    | <i>Apoa4</i>  | CCAATGTGGTGTGGGATTACT<br>T  | AGTGACATCCGTCTTCTGAAAC      |
| NM_009693    | <i>Apob</i>   | AAGCACCTCCGAAAGTACGTG       | CTCCAGCTCTACCTTACAGTTG<br>A |
| NM_001110009 | <i>Apoc1</i>  | TCCTGTCCTGATTGTGGTCGT       | CCAAAGTGTTCCCAAACCTCTT      |
| NM_009695    | <i>Apoc2</i>  | ATGGGGTCTCGGTTCTTCCT        | GTCTTCTGGTACAGGTCTTTGG      |
| NM_023114    | <i>Apoc3</i>  | TACAGGGCTACATGGAACAAG<br>C  | CAGGGATCTGAAGTGATTGTC<br>C  |
| NM_009696    | <i>Apoe</i>   | CTGACAGGATGCCTAGCCG         | CGCAGGTAATCCCAGAAGC         |
| NM_013475    | <i>Apoh</i>   | TGCCATGTTGCTATTGCAGGA       | GGCTTGCAAGGAGTAGACAATC<br>T |
| NM_009698    | <i>Aprt</i>   | CCCTCTTGAAAGACCCGGAC        | TCCAGAGAATAGGAGGCTGAC       |
| NM_007482    | <i>Arg1</i>   | CTCCAAGCCAAAGTCCTTAGA<br>G  | AGGAGCTGTCATTAGGGACAT<br>C  |
| NM_009705    | <i>Arg2</i>   | TCCTCCACGGGCAAATTCC         | GCTGGACCATATTCCACTCCTA      |
| NM_009713    | <i>Arsa</i>   | TAACATCCTGCTGATCTTTGCG      | CTGTGAACCGTAGTCCACCTT       |
| NM_019734    | <i>Asah1</i>  | CGTGGACAGAAGATTGCAGAA       | TGGTGCCTTTTGAGCCAATAAT      |
| NM_138679    | <i>Ash1l</i>  | CCTCGGTGGACTAAAGTGGTG       | CGCTGGCTCAGAACTATTTGA       |
| NM_133768    | <i>Asl</i>    | CTATGACCGGCATCTGTGGAA       | AGCAACCTGTCCAACCCTTG        |
| NM_012055    | <i>Asns</i>   | GCAGTGTCTGAGTGCATGAA        | TCTTATCGGCTGCATTCCAAAC      |
| NM_023113    | <i>Aspa</i>   | ACATGGCTGCTGTTATTCATCC      | GGGTACACGGTACAGTCTCCA       |
| NM_007494    | <i>Ass1</i>   | ACACCTCCTGCATCCTCGT         | GCTCACATCCTCAATGAACACC<br>T |
| NM_026195    | <i>Atic</i>   | GCCTCGTGAATTTGCCAGA         | AACCCTGTTAGCTCAGACACA       |
| NM_138652    | <i>Atp12a</i> | ATGCGCCGGAACAGAAATC         | CCTCCTCCTGACTCTTGTTGG       |
| NM_018731    | <i>Atp4a</i>  | GATGGAGATTAACGACCACCA<br>G  | ACGGGCAAACCTTACATACTC       |
| NM_009724    | <i>Atp4b</i>  | CAGGAGAAGAAGTCATGCAGC       | GAAACCTGCGTAGTACAGGCT       |
| NM_007505    | <i>Atp5a1</i> | TCTCCATGCCTCTAACACTCG       | CCAGGTCAACAGACGTGTGACG      |
| NM_016774    | <i>Atp5b</i>  | GGTTCATCCTGCCAGAGACTA       | AATCCCTCATCGAACTGGACG       |
| NM_001112738 | <i>Atp5c1</i> | CCAGGAGACTGAAGTCCATCA       | AGAACCTGTCCATACTACTCG       |
| NM_025313    | <i>Atp5d</i>  | TGTTTCAGGCGCGTACATAC        | CACTTGCTTGACGTTGGCA         |
| NM_025983    | <i>Atp5e</i>  | CAGGCTGGACTCAGCTACATC       | GTTTCGCTTTGAACTCGGTCTT      |
| NM_009725    | <i>Atp5f1</i> | AGTTCCTTTACCCTAAGACTGG<br>T | TTCATGCTCGACTGCTTTACTT      |
| NM_001161419 | <i>Atp5g1</i> | CCAGAGGCCCATCTAAGC          | CCCAGAATGGCATAGGAGAA<br>G   |
| NM_026468    | <i>Atp5g2</i> | CAGTGGAGTTGAAGCGACCA        | TGTCGATGTCCCTTGAATGG        |
| NM_175015    | <i>Atp5g3</i> | TCTGCATCAGTGTTATCTCGGC      | CACCAGAACCAGCAACTCCTA       |
| NM_020582    | <i>Atp5J2</i> | TATTGGCCAGAGATCAGCA         | GGGGTTTGTCGATGACTTCAA       |

|              |                 |                             |                             |
|--------------|-----------------|-----------------------------|-----------------------------|
|              |                 |                             | AT                          |
| NM_020582    | <i>Atp5j2</i>   | TGCCGAGCTGGATAATGATGC       | ACCATGCTAATCCCCGAGATG       |
| NM_013795    | <i>Atp5l</i>    | GAGAAGGCACCGTCGATGG         | ACACTCTGAATAGCTGTAGGG<br>AT |
| NM_138597    | <i>Atp5o</i>    | TCTCGACAGGTTCCGAGCTT        | AGAGTACAGGGCGGTTGCATA       |
| NM_018794    | <i>Atp6ap1</i>  | GCGCGCAACAGTGGTATCTC        | CACAGATTCCGGTCACTCGAC       |
| NM_001243051 | <i>Atp6v0a1</i> | GGACCGACAGAGGAGGATG         | GCCAAAGTCAAACCTTCTGCG       |
| NM_011596    | <i>Atp6v0a2</i> | TGGTGCAGTCCGAGACCT          | GCAGGGGAATATCAGCTCTGG       |
| NM_080467    | <i>Atp6V0a4</i> | TGGAGGCTGCGTATTGCTG         | CCTTCGGACTTCATTCACAAAC<br>T |
| NM_033617    | <i>Atp6V0b</i>  | AGTTGCTCTACCTCGGGATCT       | ATGCCACATCAAAGCGAAAGC       |
| NM_009729    | <i>Atp6v0c</i>  | TGTCCCGTTGTCCTAGCTC         | CCATGACACCGAAAAACGAAG<br>A  |
| NM_013477    | <i>Atp6v0d1</i> | GCTACTTGGAGGGATTAGTGC<br>G  | GCGGAACTCTACTACCATCTTC<br>T |
| NM_175406    | <i>Atp6v0d2</i> | CAGAGCTGTACTTCAATGTGG<br>AC | AGGTCTCACACTGCACTAGGT       |
| NM_133764    | <i>Atp6V0e2</i> | CTGGTTCGTGCCCAAAGGA         | GGCAATGAGCCAGAAGAGGT<br>AA  |
| NM_007508    | <i>Atp6v1a</i>  | CTACCCAAAATCCGCGATGAG       | CCATGTCACCTTCCAATCGAA       |
| NM_134157    | <i>Atp6v1b1</i> | AAGTTTGCCAGTATGCTGAG        | GCAGGATGTCCCCTGTGAA         |
| NM_007509    | <i>Atp6v1b2</i> | ATGCGGGGAATCGTGAACG         | AGGCTGGGATAGGTAGTCCG        |
| NM_025494    | <i>Atp6v1c1</i> | ACTGAGTTCTGGCTCATATCTG<br>C | TGGAAGAGACGGCAAGATTAT<br>TG |
| NM_001159632 | <i>Atp6v1c2</i> | TCTGAGTTTTGGCTTATTCGG<br>C  | TGTTGTGGGACAGGTTAGACT<br>TT |
| NM_023721    | <i>Atp6V1d</i>  | GGCAAAGACCGATTGAAATC<br>T   | GTCGAAATCGAAGAGTTAAGG<br>CA |
| NM_007510    | <i>Atp6v1e1</i> | AGGTCGCCTTCTCGAAACG         | ATGAGGTCATCCCTTGCTCTG       |
| NM_029121    | <i>Atp6v1e2</i> | CACCCTGGAACTCTGTTCTAC       | CTGCACGTCTATGTCAGTCAG       |
| NM_025381    | <i>Atp6v1f</i>  | GCGGGCAGAGGTAAGCTAATC       | TTAGGGTGGCGTCTTGT           |
| NM_024173    | <i>Atp6v1g1</i> | CCCAGGCTGAAATTGAACAGT       | TTCTGGAGGACGGTCATCTTC       |
| NM_023179    | <i>Atp6v1g2</i> | GAGGAGGCTCAAATGGAGGT<br>G   | CTGAACCTGCCGTCTTGTG         |
| NM_177397    | <i>Atp6v1g3</i> | GCCAAGGACAAGCTAGATGAG       | AGCCATTATCTTAGCCTGCT        |
| NM_133826    | <i>Atp6V1h</i>  | GGATGCTGCTGTCCCAACTAA       | TCTCTTGCTTGTCTCGGAAC        |
| NM_016709    | <i>Auh</i>      | AGCTGGCTCTAGCGTGTGA         | GTTCTGTTCTAACACATGGCTG<br>A |
| NM_022305    | <i>B4galt1</i>  | ATGAGGTTTCGTGAGCAGTTC       | AGAGGTAATAGACGAGGGTG<br>AC  |
| NM_017377    | <i>B4galt2</i>  | TGCCTGCTGCACTTCCTTG         | CAGGGCGGAATGACTGGAG         |
| NM_019737    | <i>B4galt6</i>  | GGGTCTCCAATCGCTCTCTG        | ATAAAGAGGTACGTGTTGGCG       |
| NM_007519    | <i>Baat</i>     | GGAAACCTGTTAGTTCTCAGG       | GTGGACCCCATATAGTCTCC        |



|              |               |                             |                             |
|--------------|---------------|-----------------------------|-----------------------------|
|              |               | C                           |                             |
| NM_130452    | <i>Bbox1</i>  | ATGGGGCTCATTGATGCAGA        | GAAGTTCCGAGCTTTTGCAG        |
| NM_007532    | <i>Bcat1</i>  | CCCATCGTACCTCTTTCACCC       | GGGAGCGTGGGAATACGTG         |
| NM_001243052 | <i>Bcat2</i>  | CAGCCACACTAGGACAGGTCT       | CAGCCTTGTTATTCCACTCCAC      |
| NM_007533    | <i>Bckdha</i> | CTCCTGTTGGGACGATCTGG        | CATTGGGCTGGATGAACTCAA       |
| NM_199195    | <i>Bckdhb</i> | CTTCCGATGCACTGTTGGTTT       | GATTTCCGCAATAGCTGTAGC<br>A  |
| NM_175177    | <i>Bdh1</i>   | ACAAGACACACGCTGTTGTTT       | CTCTTCAAGCTGTCCAGTTC        |
| NM_027208    | <i>Bdh2</i>   | CGACTGGACGGCAAAGTTATT       | CCTGGAGTTTGGACTCGTTGA       |
| NM_016668    | <i>Bhmt</i>   | TTAGAACGCTTAAATGCCGGA<br>G  | GATGAAGCTGACGAACTGCCT       |
| NM_007563    | <i>Bpgm</i>   | GGACCAGAACTTAACAACGA<br>CG  | CAGGCTGTGTGAATGGACCT        |
| NM_023525    | <i>Cad</i>    | CTGCCCGGATTGATTGATGTC       | GGTATTAGGCATAGCACAAAC<br>CA |
| NM_029502    | <i>Cant1</i>  | GCGGGAATGGAATGAGCCTAT       | CCCTGATGGTGGGAGTACAG        |
| NM_009804    | <i>Cat</i>    | AGCGACCAGATGAAGCAGTG        | TCCGCTCTCTGTCAAAGTGTG       |
| NM_007620    | <i>Cbr1</i>   | TCAATGACGACACCCCCTTC        | CCTCTGTGATGGTCTCGCTTC       |
| NM_173047    | <i>Cbr3</i>   | GTAAGTGGGGCTAACAAAGGC       | TTGACCAGCACGTTAAGTCCC       |
| NM_178224    | <i>Cbs</i>    | GGGACAAGGATCGAGTCTGG<br>A   | AGCACTGTGTGATAATGTGGG       |
| NM_001159556 | <i>Cd36</i>   | ATGGGCTGTGATCGGAACTG        | GTCTTCCAATAAGCATGTCTC<br>C  |
| NM_028176    | <i>Cda</i>    | GATCTTCTCTGGGTGCAACATA<br>G | CCTGAAATCCTTGTACCCTTCG      |
| NM_138754    | <i>Cdipt</i>  | TCCTGTTCGTGCCTAACCTTA       | AGGAGTCCGCTGAGTAGATAG<br>A  |
| NM_033037    | <i>Cdo1</i>   | GGGGACGAAGTCAACGTGG         | ACCCAGCACAGAATCATCAG        |
| NM_173370    | <i>Cds1</i>   | GGTGACCACGAAACCGAGAG        | CCGCGAATCCACCAGTTCT         |
| NM_138651    | <i>Cds2</i>   | ATGACCGAACTACGGCAGAG        | GAGGTTGGTAGGGGAGCTG         |
| NM_009885    | <i>Cel</i>    | CGCCTGGAGGTTCTATTTCTTG      | GCCCTGAAGATGTCAACAGA        |
| NM_145475    | <i>Cerk</i>   | TCCGTGCTGTGGGTGAAAC         | CGCAGTCGTCTTTTTCTCAA        |
| NM_009891    | <i>Chat</i>   | CCATTGTGAAGCGGTTTGGG        | GCCAGGCGGTTGTTTAGATAC<br>A  |
| NM_175343    | <i>Chdh</i>   | CAGGCCCTTAGAGGCTGGA         | CAAAGGTGTAATCATCCTTGCC      |
| NM_023186    | <i>Chia</i>   | CAAGCTACTTCTCGTCACAGG       | GGCAGGGGTTAATGTCATCAG       |
| NM_027979    | <i>Chit1</i>  | TGGGCAGGTGTGATGACTCT        | CCCTGGGAAAGAACCGAACTG       |
| NM_001025566 | <i>Chka</i>   | GGGCCTACCTGTGGTGTAAG        | CGCCTCAGCCCCTTCAAAT         |
| NM_007692    | <i>Chkb</i>   | AGGATGCTAAGTGCCCAGAG        | TCACGGGACAAACGCTCAG         |
| NM_144807    | <i>Chpt1</i>  | ACTGAGATCCAGGTAGCTTTA<br>GT | GTAGACCCATTCTTGCCAACA       |
| NM_021273    | <i>Ckb</i>    | AGTTCCTGATCTGAGCAGC         | GAATGGCGTCGTCCAAAGTAA       |
| NM_007710    | <i>Ckm</i>    | CTGACCCCTGACCTTACAAT        | CATGGCGGTCCTGGATGAT         |

|              |                |                             |                             |
|--------------|----------------|-----------------------------|-----------------------------|
| NM_198415    | <i>Ckmt2</i>   | ACACCCAGTGGCTATACCCTG       | CCGTAGGATGCTTCATCACCC       |
| NM_009908    | <i>Cmas</i>    | CTCCAGAGTGTGTGGGTTTC        | CGTCTAGTGAGGTAGAGCTGT<br>C  |
| NM_025647    | <i>Cmpk1</i>   | TGAAGCCGTTGGTCGTGTTC        | ACCATACTGTGAGTCTGGATT<br>T  |
| NM_020557    | <i>Cmpk2</i>   | CCTTCAGGAACAAGTGTGCAT       | TGGGAAGAACACGTAGACACA<br>T  |
| NM_177450    | <i>Cndp1</i>   | TTCTCTTCGGCACACTCTGG        | GCTTCTGTCTGAGACGAGGC        |
| NM_007744    | <i>Comt</i>    | CTGGGGGTTGGTGGCTATTG        | CCCCTCTCTCTGAGCAG           |
| NM_178379    | <i>Cox10</i>   | AGAAGAGCTATACAGGGATTG<br>CC | CTGTGTGACATACATGCGCTT       |
| NM_199008    | <i>Cox11</i>   | GTGCCCTCTATCGGCTCTA         | TAATGACCCGGTCTTGACAG        |
| NM_144874    | <i>Cox15</i>   | TAGGGTGGCGTCCAGAACA         | GGTCACTCCTCCAGAATAACT<br>G  |
| NM_009941    | <i>Cox4I1</i>  | ATTGGCAAGAGAGCCATTTCT<br>AC | CACGCCGATCAGCGTAAGT         |
| NM_053091    | <i>Cox4I2</i>  | CTGCCCGGAGTCTGGTAATG        | CAGTCAACGTAGGGGGTCATC       |
| NM_007747    | <i>Cox5a</i>   | GCCGCTGTCTGTTCCATTC         | GCATCAATGTCTGGCTTGTGA<br>A  |
| NM_009942    | <i>Cox5b</i>   | TTCAAGGTTACTTCGCGGAGT       | CGGGACTAGATTAGGGTCTTC<br>C  |
| NM_007748    | <i>Cox6a1</i>  | TCAACGTGTTCTCAAGTCGC        | AGGGTATGGTTACCGTCTCCC       |
| NM_009943    | <i>Cox6a2</i>  | CTGCTCCCTTAACTGCTGGAT       | GATTGTGGAAAAGCGTGTGGT       |
| NM_025628    | <i>Cox6b1</i>  | ACTACCTGGACTTCCACCG         | ACCCATGACACGGGACAGA         |
| NM_053071    | <i>Cox6c</i>   | GCGTCTGCGGGTTCATATTG        | TCTGCATACGCCTTCTTTCTTG      |
| NM_009944    | <i>Cox7aa</i>  | GCTCTGGTCCGGTCTTTTAGC       | GTAAGTGGGAGGTCATTGTCCG      |
| NM_009945    | <i>Cox7a2</i>  | GCTGGCCCTTCGTCAGATT         | GGCATCCCATTATCCTCCTGAA      |
| NM_009187    | <i>Cox7a2I</i> | AAGTTTAGCAGTTTCACGCAG<br>A  | GTGTGGCAAATATGATAGGTG<br>GT |
| NM_025379    | <i>Cox7b</i>   | TTGCCCTTAGCCAAAACGC         | TCATGGAACTAGGTGCCCTC        |
| NM_030052    | <i>Cox7b2</i>  | TCTCAAGACTCCAAGCATTCTG<br>A | GACAGGTTCCACTCCACACC        |
| NM_007749    | <i>Cox7c</i>   | ATGTTGGGCCAGAGTATCCG        | ACCCAGATCCAAAGTACACGG       |
| NM_001039049 | <i>Cox8c</i>   | GACTGGTGGTCTCCGGTTTG        | GGCTTCGAGAACAGGACTGC        |
| NM_001080809 | <i>Cps1</i>    | ACATGGTGACCAAGATTCTC<br>G   | TTCCTCAAAGGTGCGACCAAT       |
| NM_013495    | <i>Cpt1a</i>   | CTCCGCCTGAGCCATGAAG         | CACCAGTGATGATGCCATTCT       |
| NM_009948    | <i>Cpt1b</i>   | GCACACCAGGCAGTAGCTTT        | CAGGAGTTGATTCCAGACAGG<br>TA |
| NM_153679    | <i>Cpt1c</i>   | TCTTCACTGAGTTCCGATGGG       | ACGCCAGAGATGCCTTTTCC        |
| NM_009949    | <i>Cpt2</i>    | CAGCACAGCATCGTACCCA         | TCCAATGCCGTTCTCAAAT         |
| NM_030004    | <i>Cryl1</i>   | AGGAGTGTGTTCCAGAGAACC       | TGGTGGATTGACAGGATGAGC       |
| NM_026444    | <i>Cs</i>      | GGACAATTTTCCAACCAATCTG      | TCGGTTCATTCCCTCTGCATA       |

|              |                |                             |                             |
|--------------|----------------|-----------------------------|-----------------------------|
|              |                | C                           |                             |
| NM_145953    | <i>Cth</i>     | TTCTGCCTAGTTCCAGCAT         | GGAAGTCCTGCTTAAATGTGG<br>TG |
| NM_001168571 | <i>Ctps2</i>   | GGCATTGGTAAAGGGATTATC<br>GC | AAGGTGAGAAAGTTCCAGCAT<br>C  |
| NM_028057    | <i>Cyb5r1</i>  | CTGATCCGGGCCATCTTGAAA       | CTAGGTCCTCCCGCAGGATTA       |
| NM_029787    | <i>Cyb5r3</i>  | CAGGGCTTCGTGAATGAGGAG       | TCCACACATCAGTATCAGCGG       |
| NM_025567    | <i>Cyc1</i>    | CAGCTTCCATTGCGGACAC         | GGCACTCACGGCAGAATGAA        |
| NM_019779    | <i>Cyp11a1</i> | AGGTCCTTCAATGAGATCCCTT      | TCCCTGTAAATGGGGCCATAC       |
| NM_001033229 | <i>Cyp11b1</i> | CAGATTGTGTTTGTGACGTTGC      | CGGTTGAAGTACCATTCTGGC       |
| NM_007809    | <i>Cyp17a1</i> | GCCCAAGTCAAAGACACCTAA<br>T  | GTACCCAGGCGAAGAGAATAG<br>A  |
| NM_007810    | <i>Cyp19a1</i> | ATGTTCTTGAAATGCTGAACC<br>C  | AGGACCTGGTATTGAAGACGA<br>G  |
| NM_009993    | <i>Cyp1a2</i>  | AGTACATCTCCTTAGCCCCAG       | GGTCCGGGTGGATTCTTCAG        |
| NM_009994    | <i>Cyp1B1</i>  | CACCAGCCTTAGTGACAGACAG      | GAGGACCACGGTTTTCCGTTG       |
| NM_024264    | <i>Cyp27a1</i> | CCAGGCACAGGAGAGTACG         | GGGCAAGTGCAGCACATAG         |
| NM_010009    | <i>Cyp27b1</i> | TCCTGGCTGAACTCTTCTGC        | GGCAACGTAAACTGTGCGAA        |
| NM_021282    | <i>Cyp2e1</i>  | CGTTGCCTTGCTTGCTGGA         | AAGAAAGGAATTGGGAAAGG<br>TCC |
| NM_027816    | <i>Cyp2u1</i>  | TCCAAGGGTTCACCATTCCC        | CGATGAGGACAGAAGTCGTCT       |
| NM_007824    | <i>Cyp7a1</i>  | GGGATTGCTGTGGTAGTGAGC       | GGTATGGAATCAACCCGTTGT<br>C  |
| NM_007825    | <i>Cyp7b1</i>  | GGAGCCACGACCCTAGATG         | TGCCAAGATAAGGAAGCCAAC       |
| NM_010018    | <i>Dao</i>     | GGTGGCAAGAGGAGTGGATG        | TGGGATGATGTACGGAGAGTT<br>G  |
| NM_138942    | <i>Dbh</i>     | GAGGCGGCTTCCATGTACG         | TCCAGGGGGATGTGGTAGG         |
| NM_010022    | <i>Dbt</i>     | AGACTGACCTGTGTTTCGCTAT      | GAGTGACGTGGCTGACTGTA        |
| NM_007832    | <i>Dck</i>     | TCTCCACGGTCTGCCAAT          | CAGAACCTCTTAGGTGGGGTG       |
| NM_010024    | <i>Dct</i>     | TTCTGCTGGGTTGTCTGGG         | CACAGATGTTGGTTGCCTCG        |
| NM_001161516 | <i>Dctd</i>    | ATGGCCCGAGTATTTTCATGGC      | CATCACTGCACCCATTTGGC        |
| NM_026428    | <i>Dcxr</i>    | ACTGTGCTGGCGTTGAAGG         | CGGGTCCCACATTGCTTAGG        |
| NM_001190448 | <i>Ddc</i>     | TAGCTGACTATCTGGATGGCA<br>T  | GTCCTCGTATGTTTCTGGCTC       |
| NM_027442    | <i>Ddo</i>     | AAAGGGGAGTGGAGGTCTG         | GGGTCACTACAAGTCGCC          |
| NM_007853    | <i>Degs1</i>   | GAATGGGTCTACACGGACCAG       | CGAGAAGCATCATGGCTACAA       |
| NM_001171002 | <i>Degs2</i>   | AGCGACTTCGAGTGGGTCTA        | TCCCCGTAATAACCAGCAGG        |
| NM_172733    | <i>Dera</i>    | TCGCAGAAGCGTGAAGAAGG        | CTGCCCGGATTGGATATTTGG       |
| NM_010046    | <i>Dgat1</i>   | TCCGTCCAGGGTGGTAGTG         | TGAACAAAGAATCTTGACAGC<br>GA |
| NM_016811    | <i>Dgka</i>    | GATGAACAGATTTTCCAGGG<br>A   | GTAGCAGTACACATCACTGAG<br>AC |
| NM_178681    | <i>Dgkb</i>    | CCGCTTCTAGTTTTTGTCAACC      | AGACTGTAAACCTGACGAGGA       |

|              |               | C                           | TT                          |
|--------------|---------------|-----------------------------|-----------------------------|
| NM_177646    | <i>Dgkd</i>   | CCAGCCACCTGGGTACATTC        | CAGGGTGCAGGGAAAAGGAG        |
| NM_019505    | <i>Dgke</i>   | TGGTCCTATGGACGCTGTG         | CTGAACAGGTCGGTGTACAG        |
| NM_138650    | <i>Dgkg</i>   | ATGAGCGAAGAACAATGGGTC       | GGGCTTGTGTGGGTCATACTG       |
| NM_001081336 | <i>Dgkh</i>   | ACAGCTTTACGATCATCACTCC<br>G | GGGCCACCTCATAGGGTTCT        |
| NM_001081206 | <i>Dgki</i>   | ACTGGAGCGAGAATGCTGTG        | TCCTCCTGAGAGCGGATTTTG       |
| NM_199011    | <i>Dgkq</i>   | AGGTTTGAGAAGCCACGCATA       | GACACGGAAGTAGGAGCCCT        |
| NM_138306    | <i>Dgkz</i>   | CTCTTTGGGCACAGGAAAGC        | TGCTGACTCACTCCAGTCCA        |
| NM_001162521 | <i>Dguok</i>  | CGTCTCCGAGCGTCTTTCC         | CGATGTTGCCTTCAATGCAGA<br>G  |
| NM_053272    | <i>Dhcr24</i> | CTCTGGGTGCGAGTGAAGG         | TTCCCGGACCTGTTTCTGGAT       |
| NM_027903    | <i>Dhdh</i>   | AATTGCCAACGACTTTACCACC      | TTGAATTTCTGTGCGAACTCCT      |
| NM_020046    | <i>Dhodh</i>  | TCTTACCTCTTACCTGACAGC       | CATGTTGGAGTCTGAAACGT<br>A   |
| NM_145614    | <i>Dlat</i>   | TCCCTCCGCATCAGAAGGTT        | CCAAGTGAACATCTCTGGTC        |
| NM_007861    | <i>Dld</i>    | GAGCTGGAGTCGTGTGTACC        | CCTATCACTGTCACGTCAGCC       |
| NM_030225    | <i>Dlst</i>   | GGAAGTCCCTCTAGGGAGA         | GACGCTACCACTGTTAATGACC      |
| NM_028772    | <i>Dmgdh</i>  | ATGGAAGGACAGAGCAGAGA<br>C   | AGCCTCTCGTAAAGTTTGATGC      |
| NM_001199433 | <i>Dnmt1</i>  | AAGAATGGTGTGTCTACCGA<br>C   | CATCCAGGTTGCTCCCCTTG        |
| NM_007872    | <i>Dnmt3a</i> | GAGGGAACTGAGACCCAC          | CTGGAAGGTGAGTCTTGCA         |
| NM_001122997 | <i>Dnmt3b</i> | AGCGGGTATGAGGAGTGCAT        | GGGAGCATCCTTCGTGTCTG        |
| NM_001081695 | <i>Dnmt3l</i> | GCTCTAAGACCCTTGAACCTT<br>G  | GTCGGTTCACCTTGACTTCGTA      |
| NM_170778    | <i>Dpyd</i>   | GACATCGAGAGTATCCTGGCT       | AGGTAAAGCAGTTCTTGCCG        |
| NM_001164466 | <i>Dpys</i>   | CCACAGGGACGACTTCTCATC       | CGCTGCATCTAGGATTCGCA        |
| NM_001159646 | <i>Dut</i>    | GGCTACGACCTATTCAGTGCC       | CTGTCTTACGATGGCTTTCT        |
| NM_007898    | <i>Ebp</i>    | ATGACCACCAATACGGTCCC        | GCCAACCAGGATATGCGAAGT       |
| NM_053119    | <i>Echs1</i>  | AGCCTGTAGCTCACTGTTGTC       | ATGTACTGAAAGTTAGCACCC<br>G  |
| NM_010023    | <i>Eci1</i>   | GCAGGGGTTGCAGTGATGAA        | GATGACACCTCGGATGCTCTT       |
| NM_023737    | <i>Ehhadh</i> | ATGGCTGAGTATCTGAGGCTG       | GGTCCAAACTAGCTTTCTGGA<br>G  |
| NM_001109686 | <i>Ehmt1</i>  | CAGATGGAGAAACAAATGGGT<br>CT | TTTGCTTCCCCTTCTGTGT         |
| NM_019423    | <i>Elovl2</i> | CCTGCTCTCGATATGGCTGG        | AAGAAGTGTGATTGCGAGGTT<br>AT |
| NM_134255    | <i>Elovl5</i> | ATGGAACATTTGATGCGTCA        | GTCCCAGCCATACAATGAGTA<br>AG |
| NM_130450    | <i>Elovl6</i> | GAAAAGCAGTTCAACGAGAAC<br>G  | AGATGCCGACCACCAAAGATA       |

|              |               |                              |                             |
|--------------|---------------|------------------------------|-----------------------------|
| NM_023119    | <i>Eno1</i>   | TGCGTCCACTGGCATCTAC          | CAGAGCAGGCGCAATAGTTTT<br>A  |
| NM_013509    | <i>Eno2</i>   | GTCCCTGGCCGTGTGTAAG          | CATCCCGAAAGCTCTCAGC         |
| NM_007933    | <i>Eno3</i>   | CACAGCCAAGGGTCGATTCC         | CCCAGGTATCGTGCTTTGTCT       |
| NM_026421    | <i>Enoph1</i> | ACCACAACCCCGATTGCTTT         | TTCTCGGCCTGTTTCTCA          |
| NM_008813    | <i>Enpp1</i>  | CTGGTTTTGTCAGTATGTGTGC<br>T  | CTCACCGCACCTGAATTTGTT       |
| NM_015744    | <i>Enpp2</i>  | TTTGCCTATGCCAACAAATCGG       | GGAGGCACTTTAGTCCTGTACT<br>T |
| NM_134005    | <i>Enpp3</i>  | CAGAGGAGCCCATTAAGAAAAG<br>AC | GTGCGATGAGTCAAAGCATT<br>T   |
| NM_177304    | <i>Enpp6</i>  | CAGAGAGATTGTGAACAGAG<br>GC   | CCGATCATCTGGTGGACCT         |
| NM_001030291 | <i>Enpp7</i>  | GACAGCATAAGCTACTCCTCGT       | ACTGGGCTTTTACCCCTTCT        |
| NM_009848    | <i>Entpd1</i> | AAGGTGAAGAGATTTTGTCC<br>AA   | TTTGTCTGGGTCAGTCCAC         |
| NM_009849    | <i>Entpd2</i> | TGCGCCTACTCAACCTGAC          | CCCAGCCATACTTGATGAAGTT      |
| NM_178676    | <i>Entpd3</i> | TTGTGAGCATTGTGGTACTTGT       | GGCCACTGATACACGTAGACA<br>G  |
| NM_026174    | <i>Entpd4</i> | ATGGGGAGGATTGGCATTTC         | GGCCTCAACGTCTGTGACTC        |
| NM_001026214 | <i>Entpd5</i> | TTGGCAGCACTGTCTTCTACA        | GCCCGCATCAAACATAATTCC       |
| NM_172117    | <i>Entpd6</i> | GTTCAAGGCATCACCCCTTCT        | CCATCTGGTAGGTAGACACAC<br>A  |
| NM_007940    | <i>Ephx2</i>  | GCGTTCGACCTTGACGGAG          | TGTAGCTTTCATCCATGAGTGG<br>T |
| NM_029250    | <i>Etnk1</i>  | CTGTTCACAGATGGGATCACA<br>A   | CGCGGAAACTTTTCACTTCTC       |
| NM_175443    | <i>Etnk2</i>  | TTCAGCGTCACGGTGGAAAC         | GTGATGCCGTCTTTGAAGCG        |
| NM_146094    | <i>Fads1</i>  | CAGGTTGCAGAAAAGCACAGA        | CAGACTGGTAGTGCCACCTC        |
| NM_019699    | <i>Fads2</i>  | AAGGGAGGTAACCAGGGAGA<br>G    | CCGCTGGGACCATTGGTAA         |
| NM_010176    | <i>Fah</i>    | GCCGAGGACTCCGACTTTC          | CAGGTCCGGTAAAGAGGTGTT       |
| NM_019395    | <i>Fbp1</i>   | CACCGCGATCAAAGCCATCT         | AGGTAGCGTAGGACGACTTCA       |
| NM_007994    | <i>Fbp2</i>   | ACCCTGACCCGTTACGTTATG        | ACATTCACGCTCCCCGAAATC       |
| NM_010191    | <i>Fdft1</i>  | ATGGAGTTCGTCAAGTGTCTA<br>GG  | CGTGCCGTATGTCCCCATC         |
| NM_010210    | <i>Fhit</i>   | TCCTTCGCCCTGGTGAATAG         | CCACTTCATCAGGATGTAGGTC<br>A |
| NM_029330    | <i>Fpgt</i>   | TTTCTGAGCTGAGAGGCAAAC        | ACAAGTGTGCTTGTAAAGCGA<br>G  |
| NM_080845    | <i>Ftcd</i>   | ATGTGTCCCCAACTTCTCAGA        | GAAAGTGTAGACAGTGCGGTT       |
| NM_181666    | <i>Fuk</i>    | CTGACATGCCAGTACAAGGAC        | GGGCACTCAAGTGTTCAGC         |
| NM_021331    | <i>G6Pc2</i>  | CAGGAGGACTACCGACTTAC         | TCAACTGAAACCAAAGTGGGA       |

|              |              |                              |                             |
|--------------|--------------|------------------------------|-----------------------------|
|              |              |                              | A                           |
| NM_001159324 | <i>Gaa</i>   | GGGCCTGCACCCTTATCTC          | GAGGTCCGGTACGTCTTCCAC       |
| NM_008077    | <i>Gad1</i>  | CACAGGTCACCCTCGATTTTT        | ACCATCCAACGATCTCTCAT<br>C   |
| NM_008078    | <i>Gad2</i>  | TCCGGCTTTTGGTCCTTCG          | ATGCCGCCCGTGAACTTTT         |
| NM_008079    | <i>Galc</i>  | CGCCTACGTGCTAGACGAC          | ACGATAGGGCTCTGGGTAATT<br>T  |
| NM_178389    | <i>Gale</i>  | CAGCCACACGGTATTGGAG          | GTGCTTCTTAAAGAGGTGCTG<br>T  |
| NM_016905    | <i>Galk1</i> | GCTCAGCGTCTCTGGAAGTG         | GCGATGAGTTGGTCCATGATG       |
| NM_175154    | <i>Galk2</i> | AAGCAGGTATGTGAAGATGCG        | GCTCCAGTAAGTCGTGAGCC        |
| NM_176963    | <i>Galm</i>  | CTGCACGATCACTGCTCTG          | CACTGCTCCAAAGTAGGGCTG       |
| NM_016658    | <i>Galt</i>  | CTGAGCGTGATCTCGCCTC          | GTACACGGTCCAACCATGAAC       |
| NM_010255    | <i>Gamt</i>  | CACGCACCTGCAAATCCTG          | TACCGAAGCCCACTTCCAAGA       |
| NM_172672    | <i>Ganc</i>  | GCAGGACTGTAGGCATTTTCT        | AGTTCGGCACCTGACCTTTG        |
| NM_008084    | <i>Gapdh</i> | AGGTCGGTGTGAACGGATTTG        | TGTAGACCATGTAGTTGAGGT<br>CA |
| NM_010256    | <i>Gart</i>  | TCCTCAGGTCAAGCAAGTGTT        | TGGTCCGACAACACTACGAGTTC     |
| NM_025961    | <i>Gatm</i>  | GCTTCCTCCCGAAATTCCTGT        | CCTCTAAAGGGTCCCATTTCGT      |
| NM_008094    | <i>Gba</i>   | GCCAGGCTCATCGGATTCTTC        | CACGGGGTCAAGAGAGTCAC        |
| NM_028803    | <i>Gbe1</i>  | TTCTGACGCAGCGGAGTATG         | GCCACTCGGCTTGAATGT          |
| NM_013847    | <i>Gcat</i>  | GGACAGCGAACTGGAAGGG          | AGTTATTGGCACAGAAGTTGA<br>GG |
| NM_008097    | <i>Gcdh</i>  | CAGATCCGACCGGCCAAATC         | CGGAAGGTGTCCCTTATCAGTT<br>T |
| NM_010266    | <i>Gda</i>   | TCTGATGAGTGAAC TTGGCAA<br>C  | CAATGTGCAATGGATGCTCCT       |
| NM_013528    | <i>Gfpt1</i> | GAAGCCAACGCCTGCAAAATC        | CCAACGGGTATGAGCTATTCC       |
| NM_013529    | <i>Gfpt2</i> | ATGTGCGGAATCTTTGCCTAC        | GTCATAGCCCCTGTACTCCAG       |
| NM_008116    | <i>Ggt1</i>  | TTTGTATCATCGGCCTCTGT         | CCCGTCCAATCTCTGAGCAG        |
| NM_011820    | <i>Ggt5</i>  | TTCAATGGGACAGAAACCTTG<br>AG  | TCCCTGTGTATAAGACCTCCG       |
| NM_027819    | <i>Ggt6</i>  | TATCACAAGCTACAAC TCTGG<br>GA | GGGGGTATTTGGAGTCTCCT<br>TA  |
| NM_144786    | <i>Ggt7</i>  | TAAGGACGAGGACGCCTTCTT        | GCCCATCTCCGATGACGAC         |
| NM_010294    | <i>Gk2</i>   | GCCTCGAAGCAAACCTCTG          | TGTGTCAGTTCACCTGATGA        |
| NM_013463    | <i>Gla</i>   | TCTGTGAGCTTGCCTTTGT          | GCAGTCAAGGTTGCACATGAA<br>A  |
| NM_009752    | <i>Glb1</i>  | GCACGGCATCTATAATGTCACC       | GTATCGGAATGGCTGTCCATC       |
| NM_138595    | <i>Gldc</i>  | CTCCTGCCAGACACGATG           | GGACCGTCTTCTCGATGAGC        |
| NM_025374    | <i>Glo1</i>  | GATTTGGTCACATTGGGATTG<br>C   | TCCTTTCATTTCCCGTCATCAG      |
| NM_001081081 | <i>Gls</i>   | CTACAGGATTGCGAACATCTG        | ACACCATCTGACGTTGTCTGA       |

|              |               |                             |                             |
|--------------|---------------|-----------------------------|-----------------------------|
|              |               | AT                          |                             |
| NM_001033264 | <i>Gls2</i>   | CGTCCGGTACTACCTCGGT         | TGTCCCTCTGCAATAGTGTAGAA     |
| NM_008133    | <i>Glud1</i>  | CCCAACTTCTTCAAGATGGTGG      | AGAGGCTCAACACATGGTTGC       |
| NM_008131    | <i>Glul</i>   | TGAACAAAGGCATCAAGCAAA<br>TG | CAGTCCAGGGTACGGGTCTT        |
| NM_001039586 | <i>Glyctk</i> | CTTGCCCTGTCTCCTCCGA         | TAGGTAGAGGTTTTCCCGCAG       |
| NM_146041    | <i>Gmds</i>   | GCTCAAGCTCCCCTAAGTG         | GCCAAGTACGAACCATCCTGT       |
| NM_133708    | <i>Gmppa</i>  | AGAAGGGGACTCGCTTCAG         | CCAATGAGAAGAATCTCCTGC<br>AT |
| NM_177910    | <i>Gmppb</i>  | ATGAAGGCACTGATCTTGGTG       | GCAAGCGCCTCCACTTGAT         |
| NM_025508    | <i>Gmpr</i>   | CGCATAGACGCGGACCTTAAA       | AGTAGGTTTGCTTCGAGTTTCG      |
| NM_177992    | <i>Gmpr2</i>  | AGTCTCGAAGTGAGGTAGAGC       | GCCCACGGTATCCATATTGGC       |
| NM_001033300 | <i>Gmps</i>   | GATGCAGTGGAACTTTACTG<br>T   | AGCACGATTTAGCAAAGCTGT       |
| NM_001190414 | <i>Gne</i>    | GGGAACAACCGAAAGCTCC         | CCACGTCCAACCTCAAAGAACG      |
| NM_010321    | <i>Gnmt</i>   | AAGAGGGCTTCAGCGTGATG        | CTGGCAAGTGAGCAAACTGT        |
| NM_010322    | <i>Gnpat</i>  | ATGGACGTTCTAGCTCCTCC        | GCGGGGTGTAGCACTTCATT        |
| NM_011937    | <i>Gnpda1</i> | GAGTGGGCGCCAAGTATATT        | ACTCGTCCATGTTGAAGGTTTT<br>C |
| NM_001038015 | <i>Gnpda2</i> | ATGGGCAGCCAAGTACATCTG       | GGTTTCCACTCTTGTTGTTATC<br>G |
| NM_019425    | <i>Gnpat1</i> | ATGAAACCCGATGAAACTCCC       | GCCTCAAACCAAGCCTTCTC        |
| NM_010324    | <i>Got1</i>   | GCGCCTCCATCAGTCTTTG         | ATTCATCTGTGCGGTACGCTC       |
| NM_010325    | <i>Got2</i>   | GGACCTCCAGATCCCATCCT        | GGTTTTCCGTTATCATCCCGGT<br>A |
| NM_008149    | <i>Gpam</i>   | ACAGTTGGCACAATAGACGTT<br>T  | CCTTCCATTTAGTGTTCAGAA       |
| NM_001081089 | <i>Gpat2</i>  | CACTGCTCCGAGGTTTTGATG       | AGGTTGGCAGCAATTCATAC        |
| NM_010271    | <i>Gpd1</i>   | ATGGCTGGCAAGAAAGTCTG        | CGTGCTGAGTGTGATGATCT        |
| NM_001145820 | <i>Gpd2</i>   | GAAGGGGACTATTCTTGTTGG<br>T  | GGATGTCAAATTCGGGTGTGT       |
| NM_182805    | <i>Gpt</i>    | TCCAGGCTTCAAGGAATGGAC       | CAAGGCACGTTGCACGATG         |
| NM_173866    | <i>Gpt2</i>   | AACCATTCAGTGGTAATCC<br>GA   | GGGCTGTTTAGTAGGTTTGGG<br>TA |
| NM_008160    | <i>Gpx1</i>   | AGTCCACCGTGTATGCCTTCT       | GAGACGCGACATTCTCAATGA       |
| NM_030677    | <i>Gpx2</i>   | GCCTCAAGTATGTCCGACCTG       | GGAGAACGGGTCATCATAAGG<br>G  |
| NM_008161    | <i>Gpx3</i>   | CCTTTTAAGCAGTATGCAGGC<br>A  | CAAGCCAAATGGCCCAAGTT        |
| NM_008162    | <i>Gpx4</i>   | GATGGAGCCCATTCTGAACC        | CCCTGTACTTATCCAGGCAGA       |
| NM_010343    | <i>Gpx5</i>   | TCTAGCCAGCTATGTGCAGAC       | TCCTTCCATTAAGAGACAGAA<br>GC |

|              |                |                             |                             |
|--------------|----------------|-----------------------------|-----------------------------|
| NM_024198    | <i>Gpx7</i>    | TCCGAGCAGGACTTCTACGAC       | TCTCCCTGTTGGTGTCTGGTT       |
| NM_080289    | <i>Grhpr</i>   | GTGTCCTGACAGATGCCACTG       | GCACATCCATAATGGGCTCC        |
| NM_001252555 | <i>Gstz1</i>   | CCGGGAAGCCTATCCTCTACT       | ATTCCTCAGTGAAGTGTGCC        |
| NM_001033322 | <i>Gucy1a2</i> | CCTTGCCCTCAGACGATACACA      | GCAGTCCGAGTACATTAGCAG<br>T  |
| NM_021896    | <i>Gucy1a</i>  | CCCCTGGTCAGGTTCTAAG         | GGAGACTCCCTTCTGCATTCT       |
| NM_017469    | <i>Gucy1b3</i> | TGCTGGTGATCCGCAATTATG       | GGTTGAGGACTTTGCTTGCA        |
| NM_001127318 | <i>Gucy2c</i>  | GACTTTTCTCTCGTTACTTGG<br>A  | TGAATGCACGAGCAAAGTGG        |
| NM_001130693 | <i>Gucy2d</i>  | CTCTGTGGTATTTGGAGTGTC<br>C  | GTGAGGCATCCTGATTAAGT<br>GA  |
| NM_001007576 | <i>Gucy2f</i>  | GGACCCTGGCCTTTTTCTCG        | CCGATCTTGTAGGGGAGTGC        |
| NM_008193    | <i>Guk1</i>    | AGTGTGTCCATACTACAAGG<br>AA  | CCCTGCTGCAATATCACGC         |
| NM_010368    | <i>Gusb</i>    | GGCTGGTGACCTACTGGATT        | GGCACTGGGAACCTGAAGT         |
| NM_030678    | <i>Gys1</i>    | GAACGCAGTGCTTTTCGAGG        | CCAGATAGTAGTTGTCACCCCA<br>T |
| NM_145572    | <i>Gys2</i>    | ACCAAGGCCAAAACGACAG         | GGGCTCACATTGTTCTACTTGA      |
| NM_173371    | <i>H6Pd</i>    | ATGAAGCACACAGGCATTTGG       | TCCAGGTATAGCTGAAACAGT<br>CC |
| NM_025325    | <i>Hao</i>     | GAACGCCGTGTGAGAGTGAA        | CCAACGAACATGATTTGAGCT<br>G  |
| NM_008212    | <i>Hadh</i>    | TCAAGCATGTGACCGTCATCG       | TGGATTTTCCAGGATGTCTTC       |
| NM_178878    | <i>Hadha</i>   | TGCATTTGCCGACGCTTTAC        | GTTGGCCCAGATTTGTTCA         |
| NM_145558    | <i>Hadhb</i>   | ACTACATCAAATGGGCTCTCA<br>G  | AGCAGAAATGGAATGCGGACC       |
| NM_001159626 | <i>Hagh</i>    | CCTGCCCTGACTGACAACTAC       | GCAGTTCTATAACCTTCTGTG<br>G  |
| NM_026897    | <i>Haghl</i>   | CCCGAGACGAAGGTGTTCTG        | CGGACTGCATCCTCTGTCAC        |
| NM_010401    | <i>Hal</i>     | CTGTGCGACGCTACATGAAGA       | TCATTGTCCTTAAGGCCACC        |
| NM_010403    | <i>Hao1</i>    | CCTCGACTGGTCTGCATCAG        | ATCCGTGGATAGAGCTTCCAT       |
| NM_019545    | <i>Hao2</i>    | GCAGACTTTAAGGCACAAGCA       | TGCCAAGTTGTCATTGTAGGTT      |
| NM_008230    | <i>Hdc</i>     | CGTGAATACTACCGAGCTAGA<br>GG | ACTCGTTCAATGTCCCAAAG        |
| NM_133984    | <i>Hemk1</i>   | TCTGGGGACAAATACTTTGGA<br>CC | CCACGATGTACTCACTGGATTC      |
| NM_010421    | <i>Hexa</i>    | TGGCCCCAGTACATCCAAC         | GGTTACGGTAGCGTCGAAAGG       |
| NM_010422    | <i>Hexb</i>    | CTGGTGTGCTAGTGTGCGC         | CAGGGCCATGATGTCTCTTG        |
| NM_013547    | <i>Hgd</i>     | ATTTGGGAATGAGTGTGCTTC<br>A  | CTCAGCGTAGAGGTTGTAGGG       |
| NM_145567    | <i>Hibadh</i>  | GCAGCGGTGTGTTCTAGGTC        | ACACGTCATAGAGGATGAGTG<br>G  |
| NM_146108    | <i>Hibch</i>   | GTGGAGGCGTCATAACGCTC        | AGGAATGTGTCAGGGTCTTGT       |



|              |                 |                             |                             |
|--------------|-----------------|-----------------------------|-----------------------------|
| NM_001146100 | <i>Hk1</i>      | AGGGCGCATTACTCCAGAG         | CCCTGTGGGTGTCTTGTGTG        |
| NM_013820    | <i>Hk2</i>      | TGATCGCCTGCTTATTCACGG       | AACCGCCTAGAAATCTCCAGA       |
| NM_001206392 | <i>Hk3</i>      | TGCTGCCACATACGTGAG          | GCCTGTCAAGTGTACCCACAA       |
| NM_008254    | <i>Hmgcl</i>    | CAGGTGAAGATCGTGGAAGTC       | GGAGCCCTGCTTCGGAAAC         |
| NM_008255    | <i>Hmgcr</i>    | AGCTTGCCCGAATTGTATGTG       | TCTGTTGTGAACCATGTGACTT<br>C |
| NM_145942    | <i>Hmgcs1</i>   | AACTGGTGCAGAAATCTCTAG<br>C  | GGTTGAATAGCTCAGAACTAG<br>CC |
| NM_145942    | <i>Hmgcs1</i>   | AACTGGTGCAGAAATCTCTAG<br>C  | GGTTGAATAGCTCAGAACTAG<br>CC |
| NM_008256    | <i>Hmgcs2</i>   | GAAGAGAGCGATGCAGGAAA<br>C   | GTCCACATATTGGGCTGGAAA       |
| NM_080462    | <i>Hnmt</i>     | TCCGGGCATAATAGCAAGGAT       | TTCAGCACTTGGCTCAACAAC       |
| NM_008277    | <i>Hpd</i>      | TCGGTGACCTTCTGGGTTG         | CAAAGCCCATCTTGTTCAGTA       |
| NM_019455    | <i>Hpgds</i>    | GGAAGAGCCGAAATTATTCGC<br>T  | ACCACTGCATCAGCTTGACAT       |
| NM_008288    | <i>Hsd11b1</i>  | CAGAAATGCTCCAGGGAAAGA<br>A  | GCAGTCAATACCACATGGGC        |
| NM_008289    | <i>Hsd11b2</i>  | GGTTGTGACTGGTTTTGGC         | AGAACACGGCTGATGTCCTCT       |
| NM_010475    | <i>Hsd17b1</i>  | ACTTGGCTGTTGCCTAGC          | GAGGGCATCCTTGAGTCTTG        |
| NM_016763    | <i>Hsd17b10</i> | GCTTGGTCGCGGTAGTAACTG       | TGGGGCAAATATGCAGCTTTC       |
| NM_019657    | <i>Hsd17b12</i> | GGCTTCTGTACTGGGTGG          | CACGTTTTGCTAACTTCTCTGC      |
| NM_008290    | <i>Hsd17b2</i>  | ATGAGCCCGTTTGCCTCTG         | CCACAGGTAACAAGCTTGGT<br>C   |
| NM_008291    | <i>Hsd17b3</i>  | AGGTTCTCGCAGCACCTTTTT       | CATCGCCTGCTCCGGAATC         |
| NM_013786    | <i>Hsd17b6</i>  | GGAGCGTGTTGGAGACAGAG        | GAGGTTCACTGAAAGATAGG<br>CA  |
| NM_010476    | <i>Hsd17b7</i>  | TCTCTGCCATGTGGATAACCC       | GGTCGGTAGCGTATTTGGAAG       |
| NM_010476    | <i>Hsd17b7</i>  | TCTCTGCCATGTGGATAACCC       | GGTCGGTAGCGTATTTGGAAG       |
| NM_008293    | <i>Hsd3b1</i>   | TGGACAAAGTATTCCGACCAG<br>A  | GGCACACTTGCTTGAACACAG       |
| NM_153193    | <i>Hsd3b2</i>   | GGTTTTTGGGGCAGAGGATCA       | GGTACTGGGTGTCAAGAATGT<br>CT |
| NM_026601    | <i>Hyi</i>      | TTTTCGGCCAACGTCTCCTG        | CCCCTTCTCATGGTCTCCC         |
| NM_172015    | <i>lars</i>     | TCTGATGCTCAGGCTCTAGTT       | ATGCGATTGATGACTTCCCGA       |
| NM_198653    | <i>lars2</i>    | CGCCAGGGCAGGACATTTT         | TTCCTCCAGGTACAAGTCTG        |
| NM_010497    | <i>ldh1</i>     | ATGCAAGGAGATGAAATGACA<br>CG | GCATCACGATTCTCTATGCCTA<br>A |
| NM_173011    | <i>ldh2</i>     | GGAGAAGCCGGTAGTGGAGA<br>T   | GGTCTGGTCACGGTTTGGAA        |
| NM_029573    | <i>ldh3a</i>    | TGGGTGTCCAAGGTCTCTC         | CTCCCACTGAATAGGTGCTTTG      |
| NM_130884    | <i>ldh3b</i>    | TGGAGAGGTCTCGGAACATCT       | AGCCTTGAACACTTCTTGAC        |
| NM_008323    | <i>ldh3g</i>    | GGTGCTGCAAAGGCAATGC         | TATGCCGCCACCATACTTAG        |

|              |               |                             |                             |
|--------------|---------------|-----------------------------|-----------------------------|
| NM_008324    | <i>Ido1</i>   | GCTTTGCTCTACCACATCCAC       | CAGGCGCTGTAACCTGTGT         |
| NM_145949    | <i>Ido2</i>   | TGGGGAGATACCACATTTCTG<br>A  | TGAGGAAGTCTGAGGGCAATT<br>T  |
| AK014297     | <i>Il4l1</i>  | AACACTTGTTGGTGGAAACGA       | TCCTTGCATTAGGAGTGGTC        |
| NM_018864    | <i>Impa1</i>  | TCCAGAAAGCCCCGAGACTTTA      | GACATCAGATCGAACGGTCCA       |
| NM_053261    | <i>Impa2</i>  | AGAGGGAGAGTTGGTGCAG         | GTTTCTGTCACAAGATCGGCA       |
| NM_011829    | <i>Impdh1</i> | GGCTACGTTCCCAGGATG          | GGCTGATGTCAGGTCCACTT        |
| NM_011830    | <i>Impdh2</i> | ATTAGCGGAGGCACCTCTTAC       | CAGTGAAGTCGATATACCCAG<br>GA |
| NM_009349    | <i>Inmt</i>   | GCAGAGCAGGAAATCGTAA<br>GT   | GGGGTGTAGTCAGTGACAATG<br>AT |
| NM_008384    | <i>Inpp1</i>  | AGCAAGGTCCTTAACGGCAAC       | CCCAAGACTCTCGTGAGGGAT       |
| NM_172971    | <i>Inpp4a</i> | ACTCCATCGCTAGATCGAAAA<br>CC | AGGCAATGCTGCTTAGAAAGA<br>T  |
| NM_001024617 | <i>Inpp4b</i> | AGAACCTCAGATGGTGGCAAA       | CCCGCTCAGACTTTCTGGTG        |
| NM_183144    | <i>Inpp5a</i> | CAGGGAGAACAGTACATGAAC<br>AC | TTGGATACACTGCTACAGGGA       |
| NM_008385    | <i>Inpp5b</i> | GGGGAAGCTGCTATGCGTTT        | GGAGCGAACCTTTTCAGACAT       |
| NM_033134    | <i>Inpp5e</i> | AGCCTCCGAACACGGAAAAG        | GCTGTGGGGTGATGAGATTTG       |
| NM_008916    | <i>Inpp5k</i> | CAGCACGGAGACAGGAACAC        | AGGCCACATTCCACGTCAC         |
| NM_001122739 | <i>Inpp1</i>  | CAGCCTGGTATCACCGTGAC        | GCCACGCTCTCGCTATCTC         |
| NM_027184    | <i>lpmk</i>   | GAAGGAAGGCGTCTCCAAGTT       | CGCCAAAGTTCTATCGTTTGC       |
| NM_199056    | <i>lppk</i>   | AGAGTCCCCTGTGACAAGGA        | GCTTCATCTCGTGGGTAACATC      |
| NM_023627    | <i>lsyna1</i> | CGGCCCTCAGTCTACATTCC        | ATGTCCTTTTCGGATTTGCTCC      |
| NM_025922    | <i>ltpa</i>   | GGAGGAGGTCATTAGATTCT<br>CG  | CTCCCGACACTTCTGTATGGA       |
| NM_172584    | <i>ltpk1</i>  | GTGCAGGAAGCGAGGGATAG        | GGATGACATCGGTCAGCTTGT       |
| NM_146125    | <i>ltpka</i>  | GACTCGGAGGACGATCTGCT        | CTTCTGCCAGTGGCTTTTCTG       |
| NM_001081175 | <i>ltpkb</i>  | CGGCGCAGGCTGAATAGTAG        | ATGCCCACTTTCTGGTTCACC       |
| NM_019826    | <i>lvd</i>    | GGACGGCGAGTTTCCAGTT         | CTCCTCGTTTAGCCCGTTGA        |
| NM_001114637 | <i>Jmjd7</i>  | GACCTCAATGTACCTCGTGTTG      | CGCATAACCATCTGGCGTCA        |
| NM_027534    | <i>Kdsr</i>   | TCCAGTGGCATTGGGAAGTG        | CTTCTCTGTGCTGCTTTATG<br>A   |
| NM_008439    | <i>Khk</i>    | ATGTGGTGGACAAATACCCAG<br>A  | CAAGCAAGGAAAGGACAGTG<br>C   |
| NM_133809    | <i>Kmo</i>    | ATGGCATCGTCTGATACTCAG<br>G  | CCCTAGCTTCGTACACATCAAC<br>T |
| NM_027552    | <i>Kynu</i>   | GTCAAGCCTGCGTTAGTGG         | GGAGGGTTTGAAATTCGGAAT<br>CC |
| NM_145443    | <i>L2Hgdh</i> | TAGTCATCGTTGGAGGTGGAA       | TCCAGTCTGGTGAAGAGCTAA<br>AT |
| NM_010679    | <i>Lalba</i>  | ATTCGTTCTTTGTTCTGGT         | TGCCTTGATAGCCATCTATGTC<br>T |

|              |                |                             |                              |
|--------------|----------------|-----------------------------|------------------------------|
| NM_024434    | <i>Lap3</i>    | TGGGAGTGAGAGGTCTCTGG        | CGCACTTGTAATTGTGGCAG         |
| NM_134137    | <i>Lars</i>    | GAGCAGCAAGGGCAAATACTT       | ACTGCAAACCTCACACTTGGATA<br>A |
| NM_153168    | <i>Lars2</i>   | CATAGAGAGGAATTTGCACCC<br>TG | GCCAGTCCTGCTTCATAGAGTT<br>T  |
| NM_008490    | <i>Lcat</i>    | GTAACCACACACGGCCTGTC        | TCTTACGGTAGCACATCCAGTT       |
| NM_001177968 | <i>Lclat1</i>  | TGACATCACGGTCGCATATCC       | TGTACTCTGCCAGTAAAGTG<br>G    |
| NM_025304    | <i>Lcmt1</i>   | TGTGCTGGTTTACATGACTCC       | CCAGGTCACAACCTTCGCCT         |
| NM_177846    | <i>Lcmt2</i>   | CAGGCTCCGACTCGCTTTATT       | GTCCCCGATCTTGAAAGGACC        |
| NM_001081078 | <i>Lct</i>     | CTGTCATGGGCACAACCTTCTC      | TGTGGCATAATCAGCAAAGAG<br>G   |
| NM_001136069 | <i>Ldha</i>    | TGTCTCCAGCAAAGACTACTGT      | GACTGTACTTGACAATGTTGG<br>GA  |
| NM_175349    | <i>Ldhal6b</i> | GGGCTACAAGCATCTTGAGAG       | GACACGTTGCACCTGACTG          |
| NM_008492    | <i>Ldhb</i>    | CATTGCGTCCGTTGCAGATG        | GGAGGAACAAGCTCCCGTG          |
| NM_013580    | <i>Ldhc</i>    | TTCACGGTGTAAGTACTGTG<br>G   | TCGTATCAGCGTCAACAAGGG        |
| NM_027570    | <i>Ldhd</i>    | CTGAAGGCAGTTGTAGGGAGC       | GGAACACCTTGATTGTAGCAC<br>AG  |
| NM_001252659 | <i>Ldlr</i>    | TGACTCAGACGAACAAGGCTG       | ATCTAGGCAATCTCGGTCTCC        |
| NM_145554    | <i>Ldlrap1</i> | CCTCAAGTACCTTGGTATGACG<br>C | GAGGCTGTCCGGTCAGGATG         |
| NM_029609    | <i>Lhpp</i>    | GACATCTCCGGGGTGCTATG        | CTTTCAGCGGGGACTGTTTCA        |
| NM_001111100 | <i>Lipa</i>    | TGTTTCGTTTTACCAATTGGGA      | CGCATGATTATCTCGGTCACA        |
| NM_008280    | <i>Lipc</i>    | ATGGGAAATCCCCTCAAATCT       | GTGCTGAGGTCTGAGACGA          |
| NM_008280    | <i>Lipc</i>    | ATGGGAAATCCCCTCAAATCT       | GTGCTGAGGTCTGAGACGA          |
| NM_026334    | <i>Lipf</i>    | TGTGCTATCTGCATTTGGAGG       | ACCCCCAGAATGTAGCCATCT        |
| NM_010720    | <i>Lipg</i>    | ATGCGAAACACGGTTTTCTG        | GTAGCTGGTACTCCAGTGGG         |
| NM_145376    | <i>Lpcat1</i>  | GGCTCCTGTTGCTGCTTT          | TTCACAGCTACACGGTGGAAG        |
| NM_173014    | <i>Lpcat2</i>  | CCCTTCGTCCAGCAGACTAC        | GCAGCAAAATTATTCCAACCA<br>GT  |
| NM_145130    | <i>Lpcat3</i>  | GACGGGGACATGGGAGAGA         | GTA AACAGAGCCAACGGGTA<br>G   |
| NM_207206    | <i>Lpcat4</i>  | CTCATCCGATACCCCAACAGT       | GGGAGGAACTCTACATCCACG        |
| NM_172266    | <i>Lpgat1</i>  | CTGGGCTGGATTGTAGCGAAA       | GTCCTTCGATATACCAGAAGC<br>G   |
| NM_008509    | <i>Lpl</i>     | GGGAGTTTGGCTCCAGAGTTT       | TGTGTCTTCAGGGGTCCTTAG        |
| NM_008512    | <i>Lrp1</i>    | ACTATGGATGCCCTAAAACCTT<br>G | GCAATCTCTTTCACCGTCACA        |
| NM_001081088 | <i>Lrp2</i>    | AAAATGGAAACGGGGTGACTT       | GGCTGCATACATTGGGTTTTCA       |
| NM_013587    | <i>Lrpap1</i>  | CACAACCTCAACGTCATCCTG       | AGCACATTGTACTCCTGGATCT<br>T  |

|              |               |                             |                             |
|--------------|---------------|-----------------------------|-----------------------------|
| NM_146006    | <i>Lss</i>    | TCGTGGGGGACCCTATAAAAC       | CGTCCTCCGCTTGATAATAAGT<br>C |
| NM_008517    | <i>Lta4h</i>  | GAGGTGCGGATACTTGCTC         | CTCCTGTGACTGGACCGTG         |
| NM_008521    | <i>Ltc4s</i>  | ATGAAGGACGAAGTGGCTCTT       | CCTGTAGGGAGAAGTAGGCTT<br>G  |
| NM_008866    | <i>Lypla1</i> | TTTTCTTCACGGATTGGGAG        | GGGGACTTTTGATACCTGCAA       |
| NM_011942    | <i>Lypla2</i> | ATGTGTGGTAACACCATGTCT<br>G  | ACTCAGCCCCATCAGGTCAA        |
| NM_173740    | <i>Maoa</i>   | GCCCAGTATCACAGGCCAC         | CGGGCTTCCAGAACCAAGA         |
| NM_172778    | <i>Maob</i>   | ATGAGCAACAAAAGCGATGTG<br>A  | TCCTAATTGTGTAAGTCCTGCC<br>T |
| NM_133653    | <i>Mat1a</i>  | GTGCTGGATGCTCACCTCAAG       | CCACCCGCTGGTAATCAACC        |
| NM_145569    | <i>Mat2a</i>  | GCTTCCACGAGGCGTTCAT         | AGCATCACTGATTTGGTCACAA      |
| NM_134017    | <i>Mat2b</i>  | AGGGAACCTTTCCTGCTG          | ATTTGGAGCAATCGAGCTGAG       |
| NM_153546    | <i>Mboat1</i> | AGCCTCTTACCGTACCACC         | GGCTGGCTTTACCAGGATGTA       |
| NM_153546    | <i>Mboat1</i> | AGCCTCTTACCGTACCACC         | GGCTGGCTTTACCAGGATGTA       |
| NM_026037    | <i>Mboat2</i> | TCAGACACGTAGTTGCTACCC       | TGCAGTAGGAAATCCCCTTT<br>G   |
| NM_029934    | <i>Mboat7</i> | TACCGCACCTACCTGGATTG        | AGAAGACCGGGATCATGTAGA<br>A  |
| NM_023644    | <i>Mccc1</i>  | ACCATGAAGTATGGAACAACC<br>C  | TGCACACCCATCTTTTTGGCT       |
| NM_030026    | <i>Mccc2</i>  | GCCTATCACGGGGACTCAGT        | CACTCCCTCCTAGTCTCACATA<br>C |
| NM_028626    | <i>Mcee</i>   | ATGAGGCGTGTAGTGAAGGC        | TTTTCCAAATCTGGCACTGCTA      |
| NM_008618    | <i>Mdh1</i>   | TTCTGGACGGTGTCTGATG         | TTTCACATTGGCTTTCAGTAGG<br>T |
| NM_008617    | <i>Mdh2</i>   | TTGGGCAACCCCTTTCCTC         | GCCTTTCACATTGCTCTGGTC       |
| NM_001198933 | <i>Me1</i>    | GTCGTGCATCTCTCACAGAAG       | TGAGGGCAGTTGGTTTTATCTT<br>T |
| NM_145494    | <i>Me2</i>    | GGCTAAGAGCTGTTACCACTC<br>C  | CGTAAACGCCATTCCCTTGT        |
| NM_181407    | <i>Me3</i>    | GGAACCCCATCTCAACAAGG        | GTTGCGGTCTGGTGAGTCA         |
| NM_001171003 | <i>Mgam</i>   | CTGACCAGTCATCTAACAAGG<br>GC | CGTCACTCTCCATTTGTAGCC       |
| NM_011844    | <i>Mgll</i>   | CGGACTTCCAAGTTTTGTGAG<br>A  | GCAGCCACTAGGATGGAGATG       |
| NM_010798    | <i>Mif</i>    | GCCAGAGGGGTTTCTGTGCG        | GTTCTGTGCCGCTAAAAGTCA       |
| NM_010799    | <i>Minpp1</i> | TCCCTGGTGTGATGTGTTGA        | ACCGGCTGTTAATGGTGTAGC       |
| NM_019977    | <i>Miox</i>   | CCCTCCCTGGTCTATCGAC         | GTGGTAAAGACACGATCCAGC       |
| NM_001162493 | <i>Mpst</i>   | TACAGCCGCTGAAGTTACTG        | CAGCATGTGGTCGTAGGGG         |
| NM_024433    | <i>Mtap</i>   | ACGGCGGTGAAGATTGGAATA       | ATGGCTTGCCGAATGGAGTAT       |
| NM_138745    | <i>Mthfd1</i> | GGGAATCCTGAACGGGAAACT       | TGAGTGGCTTTGATCCCAATC       |

|              |                 |                             |                             |
|--------------|-----------------|-----------------------------|-----------------------------|
| NM_172308    | <i>Mthfd1l</i>  | GCGGAGAGGATGAGATCATA<br>GA  | GTCACCCCGTCCACATCTT         |
| NM_008638    | <i>Mthfd2</i>   | AGTGCGAAATGAAGCCGTTG        | GACTGGCGGGATTGTCACC         |
| NM_026788    | <i>Mthfd2L</i>  | AAGGACGTTGATGGATTTAC<br>AT  | GATGATTTCCCAAACGGCACT       |
| NM_016985    | <i>Mtmr1</i>    | AAGAACAGCGAAAACCTGGGA       | TGGCAGGATAGGTATCACAGA<br>AC |
| NM_023858    | <i>Mtmr2</i>    | AGAACTCGGTGCATACCAAAT<br>C  | GCTAACTGTTTGCCTCCCTCA       |
| NM_144843    | <i>Mtmr6</i>    | ACAGGAACACTGTATCTTACG<br>GC | AAGTGGTCAGAGCAAGTTTCT<br>C  |
| NM_001040699 | <i>Mtmr7</i>    | GTGGAAGAATCGAGCTGACTA<br>C  | CCCCTTTCAAAGCGGTTATAC<br>A  |
| NM_008650    | <i>Mut</i>      | TTTTTGCTATCGCCCCATTACC      | CCTCTGGGTTTTTGCCTTTCAG      |
| NM_153789    | <i>Mylip</i>    | ATGCTGTGCTATGTGACGAGG       | TCGATGATCCCTAGACGCCTG       |
| NM_019542    | <i>Nagk</i>     | CACGGTCCAAAGTCCTTTACT       | GTCTGTGCCAATCAGCCAGT        |
| NM_178053    | <i>Nags</i>     | CTCTAGCCAAGGCTTTGCAG        | CAGCCACTCAGCGTTGGTA         |
| NM_026086    | <i>Nanp</i>     | GGACAACACACTCATCGACAC       | AGCACTCCTTGCTCAGTTAAC       |
| NM_053179    | <i>Nans</i>     | CAGAACCACCAAGGAGACATA<br>GA | GGCCTTCCGGTTAAACTTGAAC      |
| NM_019750    | <i>Nat6</i>     | ATTCAACCTGTCCAAGCTAACC      | CCAGGACTGAGGCTCATCTCT       |
| NM_178772    | <i>Nceh1</i>    | TTGAATACAGGCTAGTCCCAC<br>A  | CAACGTAGGTAAACTGTTGTC<br>CC |
| NM_019443    | <i>Ndufa1</i>   | ATGTGGTTCGAGATTCTCCCT       | TGGTACTGAACACGAGCAACT       |
| NM_024197    | <i>Ndufa10</i>  | ACCTTTCACTACCTGCGGATG       | GTACCCAGGGGCATACTTGC        |
| NM_027244    | <i>Ndufa11</i>  | GGTGAAGCGGTTCTTTGAATC<br>T  | GAGCCGATTATGCCGCAAATG       |
| NM_010885    | <i>Ndufa2</i>   | TTGCGTGAGATTCGCGTTCA        | ATTCGCGGATCAGAATGGGC        |
| NM_025348    | <i>Ndufa3</i>   | ATGGCCGGGAGAATCTCTG         | AGGGGCTAATCATGGGCATAA<br>T  |
| NM_010886    | <i>Ndufa4</i>   | TCCCAGCTTGATTCTCTCTT        | GGGTTGTTCTTTCTGTCCCAG       |
| NM_001098789 | <i>Ndufa4l2</i> | AGTCTAGGGACCCGCTTCTAC       | TGTACTGGTCATTGGGACTCA       |
| NM_026614    | <i>Ndufa5</i>   | ATGGCGGGCTTGCTGAAAA         | GCTGCATGTTTAGGAAAGTGC<br>TT |
| NM_025987    | <i>Ndufa6</i>   | TCGGTGAAGCCCATTTTCAGT       | CTCGGACTTTATCCCGTCCTT       |
| NM_023202    | <i>Ndufa7</i>   | TCCGCTACTCGGTTATCCA         | GATTGAGGGAGGCACAACCTC       |
| NM_026703    | <i>Ndufa8</i>   | GGAGCTGCCAACTCTGGAAG        | CCAGCGGCACAGCATAAAC         |
| NM_025358    | <i>Ndufa9</i>   | GTCCGCTTTCGGGTTGTTAGA       | CCTCCTTTCCCGTGAGGTA         |
| NM_028177    | <i>Ndufab1</i>  | ATGGCGTCTCGTGTCTCT          | GCGGCACAAATGTGTGACT         |
| NM_026684    | <i>Ndufb10</i>  | GATTCTTGGGACAAGGATGTG<br>T  | CCTTCGTCAAGTAGGTGATGG<br>G  |
| NM_026612    | <i>Ndufb2</i>   | CCCCGGTACAGGGAGTTTC         | GCCAAAATCGCCAAAGAATCC<br>A  |

|              |               |                             |                             |
|--------------|---------------|-----------------------------|-----------------------------|
| NM_025597    | <i>Ndufb3</i> | ACAGACAGTGGAAAATTGAAG<br>GG | GCCCATGTATCTCCAAGCCT        |
| NM_026610    | <i>Ndufb4</i> | GTGTCGCACATCGTGAGTG         | GAAGGCCGAAGTTGAAGGG         |
| NM_025316    | <i>Ndufb5</i> | CAAGAGACTGTTTGTCTGCAA<br>GC | TGTTACCAGTGTATGCCAAT        |
| NM_001033305 | <i>Ndufb6</i> | TGGAAGAACATGGTCTTTAAG<br>GC | TTCGAGCTAACAATGGTGTAT<br>GG |
| NM_025843    | <i>Ndufb7</i> | CGGCGCTATCTCTGGGATG         | TGGGCACAGTAGTCACGTTG        |
| NM_026061    | <i>Ndufb8</i> | TGTTGCCGGGGTCATATCCTA       | AGCATCGGGTAGTCGCCATA        |
| NM_023172    | <i>Ndufb9</i> | GGTACTTTGCTTGCTTGATGAG<br>A | TGGGAAGATATACGGCTGAGG       |
| NM_025523    | <i>Ndufc1</i> | GTAGTGCTGCGCTCGTTTTTC       | CCAACCAGTTAGTTTTGGCAT       |
| NM_024220    | <i>Ndufc2</i> | GGCCATGAGCCCTTAAAATTCT      | CCGTGCAGTAGCCCAACAA         |
| NM_145518    | <i>Ndufs1</i> | AGGATATGTTTCGCACAACCTGG     | TCATGGTAACAGAATCGAGGG<br>A  |
| NM_153064    | <i>Ndufs2</i> | CAGCCAGATATTGAATGGGCA       | TGTTGGTCACCGCTTTTTCT        |
| NM_026688    | <i>Ndufs3</i> | TGGCAGCACGTAAGAAGGG         | CTTGGGTAAGATTCAGCCAC<br>AT  |
| NM_010887    | <i>Ndufs4</i> | CTGCCGTTCCGTCTGTAGAG        | TGTTATTGCGAGCAGGAACAA<br>A  |
| NM_001030274 | <i>Ndufs5</i> | GACATACAGAAAAAGCTGGGC<br>A  | TCGCCTCATCGTTTTGTACCG       |
| NM_010888    | <i>Ndufs6</i> | ATACCGGCCAGGTAACGATG        | AGGCTGTTGTGCTATCAAATCA<br>A |
| NM_029272    | <i>Ndufs7</i> | GTTTCATCAGAGTGTAGCCACT<br>G | CAGGCCGAAGGTCATAGGC         |
| NM_144870    | <i>Ndufs8</i> | AGTGCGCGCAACGTACAAG         | TCGAAAGAGGTAACCTAGGGT<br>CA |
| NM_133666    | <i>Ndufv1</i> | TTTCTCGCGGGTTGGTTC          | GGTTGGTAAAGATCCGGTCTT<br>C  |
| NM_028388    | <i>Ndufv2</i> | GCAAGGAATTTGCATAAGACA<br>GC | TAGCCATCCATTCTGCCTTTG       |
| NM_030087    | <i>Ndufv3</i> | GAGAGGGGCAAGCTCCTAAC        | ACGCTACCAAAGTCTTTCTTGA<br>C |
| NM_010893    | <i>Neu1</i>   | GGACCGCTGAGCTATTGGG         | CGGGATGCGGAAAGTGTCTA        |
| NM_001160164 | <i>Neu2</i>   | CACAGGCGTCCATGCTTACA        | CTGCGTGCTCATCCGTCTT         |
| NM_016720    | <i>Neu3</i>   | AGCAGGAAGAACAGAGTGGG        | CCTCCATCAGTAGCCGTTGG        |
| NM_008704    | <i>Nme1</i>   | AGGAGCACTACACTGACCTGA       | GGTTGGTCTCTCCAAGCATCA       |
| NM_008704    | <i>Nme1</i>   | AGGAGCACTACACTGACCTGA       | GGTTGGTCTCTCCAAGCATCA       |
| NM_019730    | <i>Nme3</i>   | GAGATCGTGCGTCTGCTTTGA       | CGCAGCTCGACATAATGCTC        |
| NM_019731    | <i>Nme4</i>   | TCCATATCTCAAGGCCATGA        | AGCTCGATCTCCCTCTGGG         |
| NM_080637    | <i>Nme5</i>   | AAAACCCTAGCCCTTATCAAGC      | AGGTGTAGTTCCGTCTCTGAA       |
| NM_018757    | <i>Nme6</i>   | CCTCATTGTACGAACGAGGGA       | GCAAGGATATAGGCTCGGATT<br>G  |

|              |               |                             |                             |
|--------------|---------------|-----------------------------|-----------------------------|
| NM_178071    | <i>Nme7</i>   | ATGCTTTGGAATGTCAGCGAT       | TGCTCTGTTGGATCTCTATTGCT     |
| NM_008712    | <i>Nos1</i>   | CTGGTGAAGGAACGGGTCAG        | CCGATCATTGACGGCGAGAAT       |
| NM_010927    | <i>Nos2</i>   | GTTCTCAGCCCAACAATACAA<br>GA | GTGGACGGGTCGATGTCAC         |
| NM_008713    | <i>Nos3</i>   | GGCTGGGTTTAGGGCTGTG         | CTGAGGGTGTCTAGGTGATG        |
| NM_008720    | <i>Npc1</i>   | TGTTTGGTATGGAGAGTGTGG<br>A  | GTCACAGCAGAGACTGACATT<br>G  |
| NM_023409    | <i>Npc2</i>   | AGGACTGCGGCTCTAAGGT         | AGGCTCAGGAATAGGGAAGG<br>G   |
| NM_008727    | <i>Npr1</i>   | GCTTGTGCTCTATGCAGATCG       | TCGACGAACTCCTGGTGATTTA      |
| NM_173788    | <i>Npr2</i>   | TGCTGCCAGAACACAACCTG        | TTCGGAGCTGACAAACCGC         |
| NM_008739    | <i>Nsd1</i>   | ATTTGGGCAAATCAAGAGAG<br>CG  | GCCTCCTATTGGCAACTTTCAT<br>T |
| NM_010941    | <i>Nsdhl</i>  | TCATGGTGAATCAAAGCGAGG       | CCGGGGGTTATCAAAGCCTTG       |
| NM_015807    | <i>Nt5c</i>   | CGGACCTGGCGGAAAAAGT         | GTTTCATCTCTCGCAAAGCGTC      |
| NM_001085502 | <i>Nt5c1a</i> | ATGACAACCTCTCGTCCAAGA       | AGGGCCTTCACAAAGGGGA         |
| NM_027588    | <i>Nt5c1b</i> | AGAACAGACCTATCACCCAGC       | GGCATCCCTTGTCGTGAGT         |
| NM_001164365 | <i>Nt5c2</i>  | CCTCCTGGAGTGACCGCTTA        | AACACCCGGTGATAGGCTTCT       |
| NM_001252374 | <i>Nt5c3</i>  | AAGCTCAGTTCGTATCAAGAA<br>CC | GCGCCTCCTTTAATGAGACCA<br>CC |
| NM_011851    | <i>Nt5e</i>   | GGACATTTGACCTCGTCCAAT       | GGGCACTCGACACTTGGTG         |
| NM_134029    | <i>Nt5m</i>   | GCCTGGGCTAAGCGAGAAG         | TCTGGTCAACACAATCTGCTC       |
| NM_025539    | <i>Nudt2</i>  | CTGAGGGCATGTGGCTTGAT        | GCAGGGCTGTTTCTAAGTCATT<br>C |
| NM_016918    | <i>Nudt5</i>  | GGAAGAACTGGCTACAAAG<br>GT   | TTGGCCTTACATTTCTGCAT        |
| NM_028794    | <i>Nudt9</i>  | CTCGCGTCAGTGACTGTCC         | AGACATGATGTTGGCGTTAAG<br>G  |
| NM_016978    | <i>Oat</i>    | GGAGTCCACACCTCAGTCG         | CCACATCCCACATATAAATGCC<br>T |
| NM_177215    | <i>Ocr1</i>   | AGTGAGCGACCCCTCAAGT         | AGGCAATCAATGATCTGCTGT<br>AA |
| NM_016967    | <i>Olig2</i>  | TCCCCAGAACCCGATGATCTT       | CGTGGACGAGGACACAGTC         |
| NM_001252288 | <i>Ogdh</i>   | AGGGCATATCAGATACGAGGG       | CTGTGGATGAGATAATGTCAG<br>CG |
| NM_001081130 | <i>Ogdhl</i>  | TCGCTTGGAGAGCACCTACT        | CTCGACGGAAAACTGCATCA        |
| NM_001199227 | <i>Osbpl5</i> | TTCTGGGCTGCGAAAATGAG        | GTCAGATCCATTGCATAGCCTG      |
| NM_008769    | <i>Otc</i>    | AGGGTCACACTTCTGTGGTTC       | CAGAGAGCCATAGCATGTACT<br>G  |
| NM_024188    | <i>Oxct1</i>  | CATAAGGGGTGTGTCTGCTAC<br>T  | GCAAGGTTGCACCATTAGGAA<br>T  |
| NM_011030    | <i>P4ha1</i>  | AGCCACCATTTCAAACCCAGT       | GCCAAGCACTTTTGCTAATTCT<br>G |

|              |                 |                             |                             |
|--------------|-----------------|-----------------------------|-----------------------------|
| NM_177161    | <i>P4ha3</i>    | ACATGCTCAACGTGAAGGG         | TGCCAACTTGGGAAGCAGTCAT      |
| NM_013625    | <i>Pafah1b1</i> | CCTTGGATTTCATAAGACGGC       | ACTCCCACACCTTTACTGTTTG      |
| NM_008775    | <i>Pafah1b2</i> | GCAGCTATTCCACATGCCG         | CCGCCATATCTCGTACTGCT        |
| NM_008776    | <i>Pafah1b3</i> | AACCCACTTCGAGAGAAAAAC<br>C  | CCATCAGAATGCACAAACCCA       |
| NM_133880    | <i>Pafah2</i>   | GGAGGGTCACAGTCTTGAGG        | CCCATGCTGTACTCGTAGCG        |
| NM_008777    | <i>Pah</i>      | TTGTCCTGGAGAACGGAGTC        | CTGGATTCAATGTGTGTCAGG<br>TT |
| NM_025939    | <i>Paics</i>    | ATGGCGACAGCCGTAGTAGT        | CCTGGGGTGTCTAACAACTCA       |
| NM_011863    | <i>Papss1</i>   | TGTGCAAGAAAGTCAAGCTGA       | ACCTGCCCTCTTTATTCTCG        |
| NM_001201470 | <i>Papss2</i>   | AGGCCATCATGTGAGCAG          | CACACGGTACATCCTCGGAAT       |
| NM_144844    | <i>Pcca</i>     | TTCATACCAATGCCTAGTGGTG<br>T | GACAGCCTCATCCGCCATTTT       |
| NM_025835    | <i>Pccb</i>     | GCGGCGATTAGGATTCGGG         | TGCGCTCTTAACTGAAACCG        |
| NM_011044    | <i>Pck1</i>     | CTGCATAACGGTCTGGACTTC       | CAGCAACTGCCCCGACTCC         |
| NM_028994    | <i>Pck2</i>     | ATGGCTGCTATGTACCTCCC        | GCGCCACAAAGTCTCGAAC         |
| NM_153565    | <i>Pcsk9</i>    | GAGACCCAGAGGCTACAGATT       | AATGTACTCCACATGGGGCAA       |
| NM_177546    | <i>Pcyt1b</i>   | TTCTCACGCAAGACCCTGAC        | GCAAACCTCTACCAACAAGTA<br>GC |
| NM_024229    | <i>Pcyt2</i>    | CGATGGCTGCTATGACATGGT       | GCCCCTTATGCTTGGAATCT        |
| NM_011866    | <i>Pde10a</i>   | GGACAGAGACAAGCGAGATG<br>A   | GGTGTGCTCTTGCTAGGCG         |
| NM_001081033 | <i>Pde11a</i>   | AACAGGACCTACGATGAACAG<br>G  | TGAGGCAGATTCACCCTCGAT       |
| NM_001159582 | <i>Pde1a</i>    | ATGGGGTCTACTGATACGGAC       | TCTCAGATGGGATCAAGTTGC<br>T  |
| NM_008800    | <i>Pde1b</i>    | GATGCTGGAGTCGGATTGCC        | TTCAGTGTCTAGGATTTGCCTT<br>G |
| NM_001159960 | <i>Pde1c</i>    | CCTCCTTTGCGTCACTTTAAGC      | TCATCTTGATCCGCTGATCCA       |
| NM_001243758 | <i>Pde2a</i>    | TGGCGTTGTGGACGATGAG         | CGCGATAGAAAAGCGGATGG        |
| NM_018779    | <i>Pde3a</i>    | TCCAGTCAGGAACCAGCAT         | CAAGTTGCTTACGGCCCTC         |
| NM_011055    | <i>Pde3b</i>    | AAAGCGCAGCCGTTACTAT         | CACCACTGCTTCAAGTCCCAG       |
| NM_019798    | <i>Pde4a</i>    | AATGCCCTACAGACGCCTG         | GACGGTGTGGCCATTTT           |
| NM_019840    | <i>Pde4b</i>    | CAAACAAGGTAAGGACACCTC<br>TT | TGGTAGCAAGGTACGAGCAAA       |
| NM_201607    | <i>Pde4c</i>    | TCCGAGAGCCAGTGGATTCT        | CCTTGAGTTCCAATCGTGAAG<br>AC |
| NM_011056    | <i>Pde4d</i>    | TTTTGCCAGTGCAATACATGAT<br>G | CAGAGCGAGTTCGAGTTTGT        |
| NM_153422    | <i>Pde5a</i>    | CGGCCTACCTGGCATTCTG         | GCAAGGTCAAGTAACACCTGA<br>TT |
| NM_008806    | <i>Pde6b</i>    | GCAGCACTTTTTGAACTGGTG       | CATTGCGCTGGCGGTACATA        |
| NM_001170959 | <i>Pde6c</i>    | GTGCAGAGTCAGGTAGCACTT       | TCCATCATAGGAATTGGTTGCT      |



|              |                 |                             |                             |
|--------------|-----------------|-----------------------------|-----------------------------|
|              |                 |                             | G                           |
| NM_008801    | <i>Pde6d</i>    | CCCGTGTGCCCAAGAAAATC        | CCACTCTTCTAGGCATTGTCTCT     |
| NM_012065    | <i>Pde6g</i>    | AGGGTGAGATTCGGTCAGC         | GCTCTTGAAGTGCCTTGTTTG       |
| NM_008802    | <i>Pde7a</i>    | AGTGGATCACCTCTAAGAGAC<br>G  | CGGACATCTCCTAGCATACGA<br>AT |
| NM_013875    | <i>Pde7b</i>    | TGCTAGGAGATGTACGACTAA<br>GG | GGGCCTGCGGTATAATCCC         |
| NM_008803    | <i>Pde8a</i>    | CCGAGCATCCACACTTCCG         | TCAGCTACTGATACCTTCGAGG      |
| NM_172263    | <i>Pde8b</i>    | GGGAAGTCGCTCACAGTTCA        | CAAAGGCAGGGTTGACATACT       |
| NM_008804    | <i>Pde9a</i>    | CCACCATCTCCCTTTTAACCAC      | CAGCACGCCCTGGATAAGT         |
| NM_008810    | <i>Pdha1</i>    | GAAATGTGACCTTCATCGGCT       | TGATCCGCCTTTAGCTCCATC       |
| NM_008811    | <i>Pdha2</i>    | CTGTCTCACGTATTTTCGGGAA      | AGCCGGTACAGGTCACATTTT       |
| NM_023523    | <i>Pecr</i>     | GGTCAGAGCTACCTAGCGG         | GACCACGTTACACCCCAGG         |
| NM_008819    | <i>Pemt</i>     | TGGCTGCTGGGTTACATGG         | GCTCCGAGTTCTCTGCTCC         |
| NM_001159519 | <i>Pfas</i>     | TCTCCTTCATGGGTCTCCCC        | AGGCCCTGTTTCTCCTCTATC       |
| NM_008824    | <i>Pfkfb1</i>   | ATGAGCTGCCCTATCTCAAGT       | GTCCCGGTGTGTGTTACAG         |
| NM_008825    | <i>Pfkfb2</i>   | GACAAGCCAACCTACAACCTCC      | AACTGTAATTTCTTGACGCC        |
| NM_001177758 | <i>Pfkfb3</i>   | CCCAGAGCCGGGTACAGAA         | GGGGAGTTGGTCAGCTTCG         |
| NM_173019    | <i>Pfkfb4</i>   | AGGATGTCTTGTCGCCTCTG        | CGGTACTTGTCTGATCCCG         |
| NM_008826    | <i>Pfkl</i>     | GGAGGCGAGAACATCAAGCC        | CGGCCTCCCTCGTAGTGA          |
| NM_001163487 | <i>Pfkm</i>     | TGTGGTCCGAGTTGGTATCTT       | GCACTTCCAATCACTGTGCC        |
| NM_019703    | <i>Pfkp</i>     | TGGTGCCATCATGCTATCTGA       | GGTCGCACGTCTCGACAAT         |
| NM_023418    | <i>Pgam1</i>    | TCTGTGCAGAAGAGAGCAATC<br>C  | CTGTGACACCGCCATAGTGT        |
| NM_018870    | <i>Pgam2</i>    | TGGAACCAAGAGAACCCTTTC       | TGGCATCTTTGATAGCGGTGG       |
| NM_008828    | <i>Pgk1</i>     | ATGTCGCTTTCCAACAAGCTG       | GCTCCATTGTCCAAGCAGAAT       |
| NM_031190    | <i>Pgk2</i>     | TTCTGCTAAGTTGACTCTGGAC<br>A | AGCCTTGATTCTCTGGTTGTTT<br>G |
| NM_025396    | <i>Pgls</i>     | CCAGGTCTTACCATCAATCCT       | AGGGAAGAGCGAACAGGTAT<br>G   |
| NM_025700    | <i>Pgm1</i>     | CAGAACCCTTTAACCTCTGAGT<br>C | CGAGAAATCCCTGCTCCATA<br>G   |
| NM_028132    | <i>Pgm2</i>     | AGTGAAGACGCAGGCATATCC       | GGCTCCACGGTAGAGACGA         |
| NM_027629    | <i>Pgm2l1</i>   | ATGACCTGAACTCTAACCTGCT      | CCCATTCCGCAAGAGATTTTCA<br>A |
| NM_028352    | <i>Pgm3</i>     | AGCAGTGGGATGCTATTTATG<br>TC | TGTCTGCGCTTTCTTGAGT         |
| NM_025954    | <i>Pgp</i>      | GCTTCGACCCACACTTCAG         | AGCCGGTTGTCCATGTTGG         |
| NM_133757    | <i>Pgs1</i>     | GTTCTCAGGTCACCTCCC          | CCATCACAACCTGCCTCTTGG       |
| NM_016966    | <i>Phgdh</i>    | ATGGCCTTCGCAAATCTGC         | AGTTCAGCTATCAGCTCCTCC       |
| NM_153104    | <i>Phospho1</i> | ATGAGCGGGTGTTTTCCAG         | ATCGAAGTCGAAGGTGAGGA<br>G   |

|              |                 |                             |                             |
|--------------|-----------------|-----------------------------|-----------------------------|
| NM_029293    | <i>Phpt1</i>    | TGTAGACATTGATTCGGATGG<br>C  | GCACGATTCCTTGCACTCC         |
| NM_001001983 | <i>Pi4ka</i>    | CTCAGCCATGTTTTATGCTGGG      | GGGAAGGATCGCAGGACTTTT<br>A  |
| NM_175356    | <i>Pi4Kb</i>    | ATGGGAGACATGGTAGTGGA<br>G   | TGATGACGCTTAGTAGGGAGC       |
| NM_011083    | <i>Pik3c2a</i>  | TGACAGCCCAAGAGGCTTTG        | CCTGGGTGAGCTTTTCTACATC      |
| NM_001099276 | <i>Pik3c2b</i>  | TGACATCAACAGTTTCTCTTCG<br>G | CTCTGAGTCGTAGGTGGACTT       |
| NM_011084    | <i>Pik3c2g</i>  | CCATCTATCAGCTAATCGACGT<br>G | GGAACACACTGTGAAGCTCAG       |
| NM_181414    | <i>Pik3c3</i>   | CCTGGACATCAACGTGCAG         | TGTCTCTGGTATAGCCCAGAA<br>A  |
| NM_008839    | <i>Pik3ca</i>   | CCACGACCATCTTCGGGTG         | ACGGAGGCATTCTAAAGTCAC<br>TA |
| NM_029094    | <i>Pik3cb</i>   | CTATGGCAGACAACCTTGACA<br>T  | CTCCCGAGGTACTIONCCAAC       |
| NM_001164052 | <i>Pik3cd</i>   | GTAACGACTTCCGCACTAAG<br>A   | GCTGACACGCAATAAGCCG         |
| NM_020272    | <i>Pik3cg</i>   | CGAGAGTGTGTCACAGTGTC        | TGTTGCTTCCACAAACACAG        |
| NM_011086    | <i>Pikfyve</i>  | TCCCCGACACTGGACTCTG         | GGCTGGCCCAACTTGAAC          |
| NM_008845    | <i>Pip4k2a</i>  | CTGGCGAGCAAGACCAAGA         | GGCTCAGTTCATTGATCGAAT<br>GG |
| NM_054051    | <i>Pip4k2b</i>  | AGCGCCAGCAAAACCAAGA         | CATCCGGCATTAGCATGACAG       |
| NM_054097    | <i>Pip4k2c</i>  | GCGTCGCTCACTCGATCAAT        | TGCCTCAGTTTCGCTTGGG         |
| NM_008847    | <i>Pip5k1a</i>  | ACCTGAAGGGTTCAACTTACA<br>AG | ACAGTCACGCTGTAGAGTCTT       |
| NM_008846    | <i>Pip5k1b</i>  | TGCCAAAATTCTATGGGCTGT       | GGATGCTCTTCGCTTGTATGT       |
| NM_001146687 | <i>Pip5k1c</i>  | GGATGCGTCGGGAGAGACTA        | AGGTCTTGAAGCGGAAATCCT       |
| NM_008952    | <i>Pipox</i>    | TTCTGGGATGCTATTGTGATTG<br>G | CTCTGTCCATGTGAGCTTCT        |
| NM_177298    | <i>Pisd</i>     | TCTGGGGACCTTACAGAAATT<br>GC | GGCACAGATTTATACAGGGAC<br>AC |
| NM_001099779 | <i>Pklr</i>     | TCAAGGCAGGGATGAACATTG       | CACGGGTCTGTAGCTGAGTG        |
| NM_011987    | <i>Pla2g10</i>  | GTGCAGGTGTGACGAGGAG         | CACTTGGGAGAGTCCTTCTCA       |
| NM_183423    | <i>Pla2g12a</i> | TGCCTTCTGTAGGCTGTTC         | CGCAGGTCTCGTAGCATCTG        |
| NM_023530    | <i>Pla2g12b</i> | GAACCTGGCTCAGAGTGACC        | GCAGCTCCATGAAGGAATCCA       |
| NM_133792    | <i>Pla2g15</i>  | GGGTAACCAGTTGGAAGCAAA       | TTGTCAATCCAGCAGTCAATGA<br>T |
| NM_011107    | <i>Pla2G1b</i>  | GTGTGGCAGTCCGCAATATG        | CCTGTCTAAGTCGTCCACTGG       |
| NM_001082531 | <i>Pla2g2a</i>  | TGGCTCAATACAGGACCAAGG       | GTGGCATCCATAGAAGGCATA<br>G  |
| NM_011109    | <i>Pla2g2d</i>  | TGCTGGCCGGTATAACTGC         | CTGTGGCATCTTGGGTTGC         |
| NM_012044    | <i>Pla2g2e</i>  | CCAGTGGACGAGACGGATTG        | AGCAGCTCTTGTCACTC           |

|              |                 |                             |                             |
|--------------|-----------------|-----------------------------|-----------------------------|
| NM_012045    | <i>Pla2g2f</i>  | ACTGGACGGAAGAGCCCAA         | GGATGGAGTTTCTGTGTGTGA<br>T  |
| NM_172791    | <i>Pla2g3</i>   | AGAGACCACAGGGCCATTAAG       | GCTGTAGAATGACATGGTGCT       |
| NM_008869    | <i>Pla2g4a</i>  | CAGCACATTATAGTGGAACAC<br>CA | AGTGTCCAGCATATCGCCAAA       |
| NM_145378    | <i>Pla2g4b</i>  | TGGCCCCTAGCCAACCTTG         | GTTCTGGCCTCGACTCAGG         |
| NM_001122954 | <i>Pla2g5</i>   | CCAGGGGGCTTGCTAGAAC         | AGCACCAATCAGTGCCATCC        |
| NM_001199023 | <i>Pla2g6</i>   | GCAAGCTGATTACCAGGAAGG       | GAGAGAAGAGGGGGTGAGTT<br>G   |
| NM_001145830 | <i>Plcb1</i>    | GCCCCTGGAGATTCTGGAGT        | GGGAGACTTGAGGTTACCTT<br>T   |
| NM_177568    | <i>Plcb2</i>    | TGCTGATCGAAAACGGGTGG        | AGCTTTAGAGTGGTAGGAAGT<br>GA |
| NM_008874    | <i>Plcb3</i>    | CTGCCGCTCTATCTTTGGGG        | GCCGATGTCGCTTCTTATTCTT<br>C |
| NM_013829    | <i>Plcb4</i>    | GGACAAGTGCTAGAATGTTCC<br>C  | GAAGCCGATATTCACCAGATC<br>C  |
| NM_019676    | <i>Plcd1</i>    | CAGCTCGTGGCGTAGAGAAC        | CCTGAATGTCCTCGATGGAGA<br>A  |
| NM_152813    | <i>Plcd3</i>    | GGCTACGGGCACTGAAGAAG        | GCTGCACGAAGAATATGTGCT<br>T  |
| NM_148937    | <i>Plcd4</i>    | GAAGGTTATGAAGTGCCGAT<br>GT  | AACTGCTTTGACAAGAGAATG<br>GA |
| NM_019588    | <i>Plce1</i>    | GAGTGTAAGGTCTCAGATGC<br>G   | GGAGTCTGGTGCGTTTTCT         |
| NM_021280    | <i>Plcg1</i>    | GCGGACAAAATCGAGGGGT         | TCCTATCAGGTGATCCAAGACC      |
| NM_172285    | <i>Plcg2</i>    | GTGGACACCCTTCCAGAATAT<br>G  | ACCTGCCGAGTCTCCATGAT        |
| NM_054066    | <i>Plcz1</i>    | CTCGCAGAAGCAAGATGGTTT       | GGCATGGGAAATCAAGTTTCT<br>CA |
| NM_001164056 | <i>Pld1</i>     | TCGTTTTGTGGACTGAGAACA<br>C  | GCTGCTGTTGAAACCCAAATC       |
| NM_008876    | <i>Pld2</i>     | CCTCTTCCCTATGGGGACTAT<br>C  | ACCAAGGGGTGTGCTTTCAG        |
| NM_011122    | <i>Plod1</i>    | GAAGGATGACCCAAGCTAGA        | TGAAGAACTGAGCTGAACGCT       |
| NM_011961    | <i>Plod2</i>    | GAGAGGCGGTGATGGAATGA<br>A   | ACTCGGTAAACAAGATGACCA<br>GA |
| NM_011962    | <i>Plod3</i>    | TGGATGGGGAAGGGCTAGTG        | GCCAACCTGGAATCCTCGTG        |
| NM_011125    | <i>Pltp</i>     | CGCAAAGGGCCACTTTACTA        | GCCCCATCATATAAGAACCA<br>G   |
| NM_013872    | <i>Pmm1</i>     | GTCCTGGCGGGAATGACTTT        | TGGGCTGTCTCTGGGAAGAA        |
| NM_016881    | <i>Pmm2</i>     | TGGTAGGTGGTTCAGATTTG<br>A   | CCAAGCCATTCTCTGGAACA        |
| NM_026925    | <i>Pnlip</i>    | CTGGGAGCAGTAGCTGGAAG        | AGCGGGTGTTGATCTGTGC         |
| NM_018874    | <i>Pnliprp1</i> | ATGCTGATTCTCTGGACAATCC      | GAAGTTTTAGGGCCTGATAG        |

|           |                 |                             |                             |
|-----------|-----------------|-----------------------------|-----------------------------|
|           |                 | C                           | C                           |
| NM_011128 | <i>Pnliprp2</i> | ATGCCTATGGATGTCCGTGGA       | TGCCCAGGGCTTGTCAATTG        |
| NM_008890 | <i>Pnmt</i>     | CAGACCTGAAGCACGCTACAG       | TAGTTGTTGCGGAGATAGGCG       |
| NM_013632 | <i>Pnp</i>      | CAACACACTGAATATCGACCTC<br>A | GCTTTGGGGAAAGTTGGGTAT<br>CT |
| NM_054088 | <i>Pnpla3</i>   | TCACCTTCGTGTGCAGTCTC        | CCTGGAGCCCCTCTCTGAT         |
| NM_027869 | <i>Pnpt1</i>    | CCTTCTCCATATTTGCACCAAC<br>A | TGTCGCGGTATAAACTGCTCC       |
| NM_008892 | <i>Pola1</i>    | AGCTCGGCGAGAAAAGAAATC       | CCACATAGCCTATCCCATCGTC      |
| NM_008893 | <i>Pola2</i>    | TTCAAGCAATGCCTGAGAACA       | CCTACTTGTCTAGAGGAACCT<br>G  |
| NM_011131 | <i>Pold1</i>    | TCGCAGTTTGAGGCGAACC         | CTGAGCCCACATAGTGGTCA        |
| NM_008894 | <i>Pold2</i>    | TGGGAGAGCGCAGCTTTAAC        | CCTTGAACAGAGTGCCAC          |
| NM_133692 | <i>Pold3</i>    | AAGATCGTGACTTACAAGTGG<br>C  | ACACCAAGTAGGTAACATGCA<br>G  |
| NM_027196 | <i>Pold4</i>    | ATCACTGACTCCTATCCTGTTG<br>T | TACTGCCAGGCCAGGTCAA         |
| NM_011132 | <i>Pole</i>     | CTCAGCACTCAAGCGTCTGG        | GCCACCTTAAATCTGCTCCAT       |
| NM_011133 | <i>Pole2</i>    | TGTCACTGAATTGGAGCTAGA<br>GG | ACTGACTGCACTCTTGCACAG       |
| NM_021498 | <i>Pole3</i>    | GAGAGGCCCGAGGACCTAAAT       | TGGCATACAAACGAAGACAC<br>TG  |
| NM_025882 | <i>Pole4</i>    | ACGCCAGAGAGGAAGAGG          | CCAGCGTTACGTCAGGGTC         |
| NM_009088 | <i>Polr1a</i>   | GCATGGCAGGACGAGAAGG         | GATCGTACTGGATGACCAGCC       |
| NM_009086 | <i>Polr1b</i>   | CAGGCCATACCTCCCTTTGAA       | TCCCTCGGTAGGTGCTCTTTC       |
| NM_009085 | <i>Polr1c</i>   | CGTGGTTCTCGGAGAGTTTGG       | CCAGCGTGTCTTCATCCATTT       |
| NM_009087 | <i>Polr1d</i>   | GAAGGCGAGAGGAAGACAGC        | TGGGTCTAGTGTAAACCACAA<br>A  |
| NM_022811 | <i>Polr1e</i>   | CAGGGACAAGTTGGATTCTTG<br>C  | AGAGGGCGTCATATTGTAAGT<br>CA |
| NM_009089 | <i>Polr2a</i>   | CTGGACCTACCGCATGTTC         | GTCATCCCGCTCCCAACAC         |
| NM_153798 | <i>Polr2b</i>   | GACGACGATGAGATCACTCCG       | GGTGCATCTTCCACAATTCTTT<br>G |
| NM_009090 | <i>Polr2c</i>   | CTCACCGAAGAGAACGTCAAG       | TCGATGGCTATTATGGGCACC       |
| NM_027101 | <i>Polr2d</i>   | GCTGGCGACGTAGAAGAAGA<br>C   | CTGCTTTCGATGCTCCAGAAG       |
| NM_025554 | <i>Polr2e</i>   | GGTGGGCATCAAGACCATCAA       | TCAGGGACTAGCTCGTGCTC        |
| NM_027231 | <i>Polr2f</i>   | GACAACGAGGACAATTCGAC<br>G   | GGAGAATCTCGACATTTTCCTG<br>G |
| NM_026329 | <i>Polr2g</i>   | AAGCGACCGCAGAGAAGTG         | CGTGCTCCAGGGAAATGTGAT<br>A  |
| NM_145632 | <i>Polr2h</i>   | CTGCACTGTGAGAGTGAATCT<br>T  | GCTATGACCAACCGGAACCTG       |

|              |                |                             |                             |
|--------------|----------------|-----------------------------|-----------------------------|
| NM_027259    | <i>Polr2l</i>  | CATCTACGTCAACAAAATCACG<br>C | GCAGTGCAACATAGTACAGG<br>C   |
| NM_011293    | <i>Polr2j</i>  | GCCTTCGAGTCGTTCTTGCT        | GCGATTTAATGATGTTCCCCAG<br>A |
| NM_001039368 | <i>Polr2k</i>  | GCAAACCAGGAGAGACACTT        | TGAGCGTCCATTGTTAGTGCC       |
| NM_025593    | <i>Polr2l</i>  | GGGAAGATCGTCGGCAACAAA       | TAGGGGTGCATAGTTCAGCAG       |
| NM_001081247 | <i>Polr3a</i>  | GACAGCCATTGAGCATAACAA<br>AG | CTGGGATGCGCTTAAACAAGT       |
| NM_027423    | <i>Polr3b</i>  | CCCATCAAGAATGACGGTTGG       | ACATCCTTCACTTTACTCCCTCC     |
| NM_028925    | <i>Polr3c</i>  | GATACACAGATAACAAGGAGC<br>CC | CGCTCACGATTGCTTGCTC         |
| NM_025945    | <i>Polr3d</i>  | AAAAGCGTGAACGGGACAGG        | CCACGGTCTTATCCCAGTTCC       |
| NM_029763    | <i>Polr3f</i>  | AAGCCGTGAAGTCTGTAGCAG       | TGCCTTGCTTTGTAGGAATTTG<br>A |
| NM_001081176 | <i>Polr3g</i>  | AGAGAGGCGAGGGTGAAAGA<br>T   | GCCGTTGTGGAAGTAGGAGTT       |
| NM_027241    | <i>Polr3gl</i> | TCCTCCCTTGAGTTCACC          | CAATAGGCCAGACATCTGAT<br>AC  |
| NM_030229    | <i>Polr3h</i>  | CATACCCCGTGGCAGTTT          | CGTAGCGGAAATGGACTTTGG       |
| NM_025901    | <i>Polr3k</i>  | TGCGGGAACGGACTCATTG         | CGGTTTGTACCTTACGGGTGA       |
| NM_026438    | <i>Ppa1</i>    | AGTACCGCGTCTTCTCAAAA        | GACCAGCGTGAACCTCAAC         |
| NM_146141    | <i>Ppa2</i>    | GATGCTGACGCACCTCAGAAT       | AGAACCTTCATTTGCGACAGG       |
| NM_172146    | <i>Ppat</i>    | GCGAGGAATGTGGTGTGTTG        | TTTAGGCACTGCACTCCCATC       |
| NM_007453    | <i>Prdx6</i>   | CGCCAGAGTTTGCCAAGAG         | TCCGTGGGTGTTTACCATTG        |
| NM_008921    | <i>Prim1</i>   | ATGGAGCCATTTGATCCTGCG       | CACTCCGCCATAGTTGAGCC        |
| NM_008922    | <i>Prim2</i>   | GCGGGTGACCAGAGAAATG         | ACATAGCTCACACCGAGGTTT       |
| NM_011172    | <i>Prodh</i>   | GCACCACGAGCAGTTGTTT         | CTTTGTTGTGCCGATCAGAG        |
| NM_019546    | <i>Prodh2</i>  | GTGGGGCCTTCCATGTCAAG        | CCTGAAACGCTAGTCCATGAG<br>T  |
| NM_021463    | <i>Prps1</i>   | ACTTATCCCAGAAAATCGCTGA<br>C | CCACACCCACTTTGAACAATGT<br>A |
| NM_029294    | <i>Prps1l1</i> | CCAAACATCAAACCTTTCAGCG      | AACTCTACCAATTTCCACG         |
| NM_026662    | <i>Prps2</i>   | ATGCCTAACATCGTGCTCTTC       | GATCTCGACTGGTCTCCTG         |
| NM_177420    | <i>Psat1</i>   | CAGTGGAGCGCCAGAATAGAA       | CCTGTGCCCTTCAAGGAG          |
| NM_133900    | <i>Psph</i>    | AGGAAGCTCTTCTGTTACGCG       | GAGCCTCTGGACTTGATCCC        |
| NM_008959    | <i>Ptdss1</i>  | GCAGGACTCTGAGCAAGGATG       | GGCGAAGTACATGAGGCTGAT       |
| NM_013782    | <i>Ptdss2</i>  | GGATTGCCTTTCAGTTCACGC       | AGGTAGAAGGTGTTTACGCTCT<br>G |
| NM_008960    | <i>Pten</i>    | TGGATTCGACTTAGACTTGACC<br>T | GCGGTGTCATAATGTCTCTCAG      |
| NM_008963    | <i>Ptgds</i>   | TGCAGCCCACTTTCAACAAG        | TGGTCTCACACTGGTTTTTCT       |
| NM_022415    | <i>Ptges</i>   | GGATGCGCTGAAACGTGGA         | CAGGAATGAGTACACGAAGCC       |
| NM_133783    | <i>Ptges2</i>  | CCTCGACTTCCACTCCCTG         | TGAGGGCACTAATGATGACAG       |

|              |               |                             |                             |
|--------------|---------------|-----------------------------|-----------------------------|
|              |               |                             | AG                          |
| NM_008968    | <i>Ptgis</i>  | ACAGCATCAAACAATTTGTCGT<br>C | GCATCAGACCGAAGCCATATC<br>T  |
| NM_008969    | <i>Ptgs1</i>  | ATGAGTCGAAGGAGTCTCTCG       | GCACGGATAGTAACAACAGGG<br>A  |
| NM_011198    | <i>Ptgs2</i>  | TGAGCAACTATCCAAACCAG<br>C   | GCACGTAGTCTTCGATCACTAT<br>C |
| NM_144795    | <i>Pycr1</i>  | ATGAGCGTAGGCTTCATCGG        | CGAGACCGTAGCTTGGTCC         |
| NM_133705    | <i>Pycr2</i>  | ATGAGCGTGGGTTTCATCGG        | GCTTCGGGTCAGATTCACACC       |
| NM_025412    | <i>Pycr1</i>  | ATGGCAGCGACAATGTCTGAA       | CCAGCACTTGTTTAGCTTCTAC<br>T |
| NM_153781    | <i>Pygb</i>   | CCGCGACTACTTCTTCGCTC        | CAACCCCAACTGATAAGTGGC       |
| NM_133198    | <i>Pygl</i>   | GAGAAGCGACGGCAGATCAG        | CTTGACCAGAGTGAAGTGCAG       |
| NM_011224    | <i>Pygm</i>   | CTTAGCCGGAGTGGAAAATGT       | GTAATCTCTCGGAGTAGCCAC<br>A  |
| NM_153196    | <i>Rbks</i>   | GGTTCCTGCATGACCGACC         | TGCCAAAAGAATCGTTGCCAA       |
| NM_001164704 | <i>Renbp</i>  | GTATTGTCGCTTATACCGCAGT      | AACGCAGCAAAAATTCACCAC       |
| NM_025683    | <i>Rpe</i>    | GCACCTGGATGTAATGGACGG       | CCTGGCCTAGCTGCTTTCG         |
| NM_009075    | <i>Rpia</i>   | AAGGCCGAGGAGGCTAAGAA        | CTTTCAGCTATTCGCTGCACA       |
| NM_009103    | <i>Rrm1</i>   | GCCGCCAAGAGCGAGTTAT         | TCATGGTGATCTGAGCAGGAT       |
| NM_009104    | <i>Rrm2</i>   | TGGCTGACAAGGAGAACACG        | AGGCGCTTACTTTCCAGCTC        |
| NM_199476    | <i>Rrm2b</i>  | GAGCCACTCCTAAGAAAGAGT<br>TC | GAGGGAGGTCCTTTGACAAGT       |
| NM_138665    | <i>Sardh</i>  | CGGGTCCTACGTGTAGCTG         | TGATAAGGAACACTCTTCTCG<br>GT |
| NM_009121    | <i>Sat1</i>   | GAGAACACCCCTTCTACCACT       | GCCTCTGTAATCACTCATCACG<br>A |
| NM_026991    | <i>Sat2</i>   | AGGTTGCCCTGAATAAGGGTT       | CTCGCCTCAAATCGAAAGGA        |
| NM_016741    | <i>Scarb1</i> | AAACAGGGAAGATCGAGCCA<br>G   | GGTCTGACCAAGCTATCAGGT<br>T  |
| NM_023281    | <i>Sdha</i>   | GGAACACTCCAAAACAGACC<br>T   | CCACCACTGGGTATTGAGTAG<br>AA |
| NM_023374    | <i>Sdhb</i>   | AATTTGCCATTTACCGATGGGA      | AGCATCCAACACCATAGGTCC       |
| NM_025321    | <i>Sdhc</i>   | GCTGCGTTCTTGCTGAGACA        | ATCTCCTCCTTAGCTGTGGTT       |
| NM_025848    | <i>Sdhd</i>   | TGGTCAGACCCGCTTATGTG        | GGTCCAGTGGAGAGATGCAG        |
| NM_145565    | <i>Sds</i>    | GAAGACCCCACTTCGTGACAG       | TCTTGACAGAGATGCCCAATGC      |
| NM_178029    | <i>Setd1a</i> | TGCTGTCCCTCGTAGACTGG        | GGCTCTTCCGTTTTACCTTGA       |
| BC038367     | <i>Setd1b</i> | TCCTCAAGCTCCGACAAGGAT       | CGTCGATGTCTGAATCAATCTG<br>G |
| NM_001081340 | <i>Setd2</i>  | CACCAGGTTACCCCATGCAAG       | TCTGTAGAATGTCCTACCAAG<br>GG |
| NM_001163642 | <i>Setdb1</i> | CAACTGCACAATCACGGAAA<br>C   | CAAAGGTGACCGATATGTCTG<br>G  |

|              |               |                             |                              |
|--------------|---------------|-----------------------------|------------------------------|
| NM_001081024 | <i>Setdb2</i> | GGATGGAGCTACAAGATGATG<br>G  | CCAGTGTTTGCCTGTTACTCAG       |
| NM_178391    | <i>Setmar</i> | AGATAGCAGCATCTGAGGAGG       | TCCAGGTCCAGCGACATGA          |
| NM_001168525 | <i>Sgms1</i>  | GAAGGAAGTGTTTACTGGTC<br>AC  | GACTCGGTACAGTGGGGGT          |
| NM_028943    | <i>Sgms2</i>  | GAGACAGCAAACTTGAAGGT<br>CA  | CCCGTTGGATAAGGTCTTGGG        |
| NM_009163    | <i>Sgpl1</i>  | CTGAAGGACTTCGAGCCTTATT<br>T | ACTCCACGCAATGAGCTGC          |
| NM_030750    | <i>Sgpp1</i>  | GATGCAGAGACCGAGGTTCCG       | CGGCAAGTTGCTCACTTTGAC        |
| NM_001004173 | <i>Sgpp2</i>  | TTCACCCACTGGAATATCGACC      | AAGTCTCACAACGGGAGGAAA        |
| NM_009171    | <i>Shmt1</i>  | CAGGGCTCTGTCTGATGCAC        | CGTAACGCGCTCTTGTAC           |
| NM_001077515 | <i>Slc1a2</i> | GCCAACAATATGCCAAGCAG        | GACACCAAACACAGTCAGTGA        |
| NM_148938    | <i>Slc1a3</i> | ACCAAAGCAACGGAGAAGA<br>G    | GGCATTCCGAAACAGGTAAC<br>C    |
| NM_011421    | <i>Smpd1</i>  | TGGGACTCCTTTGGATGGG         | CGGCGCTATGGCACTGAAT          |
| NM_009213    | <i>Smpd2</i>  | TGGGACATCCCCTACCTGAG        | TAGGTGAGCGATAGCCTTTGC        |
| NM_021491    | <i>Smpd3</i>  | ACACGACCCCTTCTTAATA         | GGCGCTTCTCATAGGTGGTG         |
| NM_001164611 | <i>Smpd4</i>  | CACACTAGCCTCTTGAAGCGA       | TGTAGAACCTCCAACCTGGCAT       |
| NM_009230    | <i>Soat1</i>  | GAAGGCTCACTCATTTGTGAG<br>A  | GTCTCGGTAATAAGTGTAGG<br>CG   |
| NM_146064    | <i>Soat2</i>  | ACAAGACAGACCTCTTCCCTC       | ATGGTTCGGAAATGTTGCACC        |
| NM_146126    | <i>Sord</i>   | GCTAAGGGCGAGAACCTGTC        | CATGCTCCAGTAGTGAACATC        |
| NM_019972    | <i>Sort1</i>  | CCCGACTTCATCGCCAAG          | AGGACGAGAATAACCCCACTG        |
| NM_001172472 | <i>Sphk1</i>  | ATGGAACCAGTAGAATGCCCT       | TCCGTTCCGGTGAGTATCAGTTT<br>A |
| NM_020011    | <i>Sphk2</i>  | CACGGCGAGTTTGGTTCTA         | CTTCTGGCTTTGGGCGTAGT         |
| NM_009269    | <i>Sptlc1</i> | ACGAGGCTCCAGCATACCAT        | TCAGAACGCTCCTGCAACTTG        |
| NM_011479    | <i>Sptlc2</i> | AACGGGGAAGTGAGGAACG         | CAGCATGGGTGTTTCTTCAAAA<br>G  |
| NM_009270    | <i>Sqle</i>   | ATAAGAAATGCGGGGATGTCA<br>C  | ATATCCGAGAAGGCAGCGAAC        |
| NM_175283    | <i>Srd5a1</i> | GAGTTGGATGAGTTGCGCCTA       | GGACCACTGCGAGGAGTAG          |
| NM_053188    | <i>Srd5a2</i> | GATCCTGTGCTTTGGGAAACC       | GCATCCCTACCGACACCAC          |
| NM_020611    | <i>Srd5A3</i> | CTACGTCATCTCAGTTGTGTGG      | GAGCAGAGCACTAAGCCAGT         |
| NM_009272    | <i>Srm</i>    | ACATCCTCGTCTTCCGCAGTA       | GGCAGGTTGGCGATCATCT          |
| NM_011485    | <i>Star</i>   | ATGTTCTCGTACGTTCAAG         | CCCAGTGCTCTCCAGTTGAG         |
| NM_021547    | <i>Stard3</i> | GTGACTTGAGCGCAGTTTG         | GCCAGTGTGGTATTTAGCTCG        |
| NM_009293    | <i>Sts</i>    | CTCGTGACATCATCCTCGC         | GCGTTTTGTTGCCGTAGCAG         |
| NM_011506    | <i>Sucla2</i> | ACCCTTTCGCTGCATGAATAC       | CCTGTGCCTTTATCACAACATC<br>C  |
| NM_019879    | <i>Suclg1</i> | TGGGATACGACACGGGTCTTA       | CAGAAGCCGTTGCTCCTGTT         |
| NM_011507    | <i>Suclg2</i> | CCCCGAAGATGGCTGAACC         | ACCTCCTTTCAAACCGCTATTG       |

|              |                |                             |                              |
|--------------|----------------|-----------------------------|------------------------------|
| NM_023135    | <i>Sult1e1</i> | ATGGAGACTTCTATGCCTGAG<br>T  | ACACAACCTTCACTAATCCAGGT<br>G |
| NM_017465    | <i>Sult2b1</i> | ACATCACGGGACTGCTGTG         | GTCGCAAGGCCCTTCATTCA         |
| NM_011514    | <i>Suv39h1</i> | GCAGTGTGTGCTGTAAATCTTC<br>T | ATACCCACGCCACTTAACCAG        |
| NM_022724    | <i>Suv39h2</i> | CTGCCAGGATAGCATTGTTC        | CAAGTCTCGGCTCCACATTTAC       |
| NM_001164483 | <i>Synj1</i>   | GGAAGAATGTCTCATGTTCGA<br>GT | CCAGATAGTGCAGCATGGTAT<br>CA  |
| NM_001113352 | <i>Synj2</i>   | GCTGAGGTTACAATCCGGTGG       | CAGGCGGTCTCTTCTTG            |
| NM_011528    | <i>Taldo1</i>  | GTAAGCGCCAGAGGATGGA<br>G    | CTCTTGGTAGGCAGGCATCT         |
| NM_146214    | <i>Tat</i>     | TGCTGGATGTTTCGCTCAATA       | CGGCTTCACCTTCATGTTGTC        |
| NM_001242615 | <i>Taz</i>     | ATGGTGTCTACCAGAAAGGGA<br>T  | CGGTGATTTTCAACATGCCACA       |
| NM_011539    | <i>Tbxas1</i>  | TACCATAGTACTGTGACTCTG<br>C  | GGTGCCTGATGCCCAACTT          |
| NM_001136091 | <i>Tcirg1</i>  | CACAGGGTCTGCTTACAACCTG      | CGTCTACCACGAAGCGTCTC         |
| NM_019911    | <i>Tdo2</i>    | ATGAGTGGGTGCCCGTTTG         | GGCTCTGTTTACACCAGTTGA<br>G   |
| NM_027179    | <i>Tecr</i>    | AAGCACTACGAGGTGGAGATT       | TGAGGCTCTACCTTGTCCAGG        |
| NM_009387    | <i>Tk1</i>     | AAGTGCCTGGTCATCAAGTAT<br>G  | GCTGCCACAATTACTGTCTTGC       |
| NM_021028    | <i>Tk2</i>     | AGCAGTGGTTTGTATTGAGGG       | ACATGAGGCTCAGAGGGTTAT<br>G   |
| NM_009388    | <i>Tkt</i>     | ATGGAAGGTTACCATAAGCCA<br>GA | TGCAGCATGATGTGGGGTG          |
| NM_031379    | <i>Tktl1</i>   | CTGCGAATCCGTTCCATCAG        | GTCTGGGTTTTCGGGGTCTTC        |
| NM_028927    | <i>Tktl2</i>   | TGGAGTCGGACACCCTTCA         | CTCTGCCACACTACAGCACG         |
| NM_028454    | <i>Tm7Sf2</i>  | GTCGCGCTTTACTGATCCT         | CAGGCAGATAGGCCGGTAG          |
| NM_138758    | <i>Tmlhe</i>   | GAGAGGAAACATAGCTCAAG<br>GTC | CCAGCATATTGCAGTTCCAAT<br>G   |
| NM_001136084 | <i>Tph1</i>    | AACAAAGACCATTCTCCGAA<br>AG  | TGTAACAGGCTCACATGATTCT<br>C  |
| NM_173391    | <i>Tph2</i>    | GGTTGTCCTTGGATTCTGCTG       | GCCTGGATTGATATGAAGCA<br>T    |
| NM_009415    | <i>Tpi1</i>    | CCAGGAAGTTCTTCGTTGGGG       | CAAAGTCGATGTAAGCGGTGG        |
| NM_009417    | <i>Tpo</i>     | CTTGAGCTATGGCAATAATG<br>CT  | GAGCTGGCTCGTTTCCACA          |
| NM_010067    | <i>Trdmt1</i>  | CACGCGCTGCGAAAAAGTC         | CCCTGTAGGCCAATTCTTGTG        |
| NM_021481    | <i>Treh</i>    | TCCAACCTACCCCACTTTG         | CCACTGCTGGCCTGTGTTA          |
| NM_028604    | <i>Trmt11</i>  | GCTCCTGAATCGCTATCTCTT<br>G  | ACTGTTAGTGAAGTCCCTCC         |
| NM_009775    | <i>Tspo</i>    | GCCTACTTTGTACGTGGCGAG       | ATGGCTGAATACAGTGTGGCC        |
| NM_031201    | <i>Tsta3</i>   | AAGGTGGTTGCAGATGGGG         | CCATTGCAGCGAGATGGATGA        |



|              |                |                             |                              |
|--------------|----------------|-----------------------------|------------------------------|
| NM_001042523 | <i>Txnrd1</i>  | CCCACCTTGCCCCAACTGTT        | GGGAGTGTCTTGGAGGGAC          |
| NM_013711    | <i>Txnrd2</i>  | AAACCAGGACTTTGAATCTGG<br>AG | GATGTGGGGAACAGAGGTAG<br>C    |
| NM_138302    | <i>Tymp</i>    | CGCGGTGATAGATGGAAGAG<br>C   | CACACCTCCTGTGGAGTGT          |
| NM_021288    | <i>Tyms</i>    | GGAAGGGTGT TTTGGAGGAGT      | GCTGTCCAGAAAATCTCGGGA        |
| NM_011661    | <i>Tyr</i>     | CTCTGGGCTTAGCAGTAGGC        | GCAAGCTGTGGTAGTCGTCT         |
| NM_133806    | <i>Uap1</i>    | CCATCCCCGCTTCAAAGAT         | CCCTCTCCAGCATAAGAGATG<br>A   |
| NM_011675    | <i>Uck1</i>    | ACCGTAGTGGCAAGTCAAC         | AGAACCTTGTAGAAGCAGTCC<br>T   |
| NM_030724    | <i>Uck2</i>    | CTCCGTTTGTGCTAAGATCGT       | GTGAGGACTCGGTAGAAGCTA<br>T   |
| NM_026765    | <i>Uckl1</i>   | CAGGCCGAGCAGAATGAAAC        | CCTTGGACTGTGTACCATGTTC       |
| NM_011673    | <i>Ugcg</i>    | GGAATGGCCTTGTTCCGGCT        | CGGCTGTTTGTCTGTTGCC          |
| NM_009466    | <i>Ugdh</i>    | AGTAGTCAATCCTGTGCGAGG       | CTCCGTGACAATTTTGTACCCA       |
| NM_139297    | <i>Ugp2</i>    | AGCAAAGCTATGTCTCAAGAT<br>GG | GAGGCTGCTGTGGTAAGTATT<br>T   |
| NM_201645    | <i>Ugt1a1</i>  | GCTTCTCCGTACCTTCTGTTG       | GCTGCTGAATAACTCCAAGCA<br>T   |
| NM_053184    | <i>Ugt2a1</i>  | AGCCTTCTAGGAATGAGTCTT<br>GG | CAAGGACAGTCACATTATGCT<br>CT  |
| NM_028094    | <i>Ugt2a3</i>  | CGTGTGGCCCTGTGATATGAG       | GTGCAGTGGAAATACGTTTACT<br>CT |
| NM_009471    | <i>Umps</i>    | GTCACCGAGCTGTATGACGTG       | GGTAACGCTGTATAAGGAACT<br>CC  |
| NM_133995    | <i>Upb1</i>    | GTGCCTGGAAAAACATCTGCC       | GCGGGATTCTGTTCTGAACGA        |
| NM_001159402 | <i>Upp1</i>    | ACAGGAACTGAAGCAAAGGA<br>C   | GTTGAAATGGTAGAGCACGTC<br>TT  |
| NM_029692    | <i>Upp2</i>    | GGGAGCGTCCAGAGTATGG         | CTGGTAGGTTGTGTGTTTTGGT       |
| NM_001081189 | <i>Uprt</i>    | GGAAAATAACGCTGCTATGGC<br>T  | GAGAGTCCCGCTCCGAAAG          |
| NM_197979    | <i>Uqcr10</i>  | ATCCCTTCGCGCCTGTACT         | GTGCTCGTAGATCGCGTCT          |
| NM_026219    | <i>Uqcrb</i>   | GGCCGATCTGCTGTTTCAG         | CATCTCGCATTAAACCCAGTT        |
| NM_025407    | <i>Uqcrc1</i>  | AGACCCAGGTCAGCATCTTG        | GCCGATTCTTTGTTCCCTTGA        |
| NM_025899    | <i>Uqcrc2</i>  | AAAGTTGCCCCGAAGGTTAAA       | GAGCATAGTTTTCCAGAGAAG<br>CA  |
| NM_025710    | <i>Uqcrfs1</i> | GAGCCACCTGTTCTGGATGTG       | GCACGACGATAGTCAGAGAAG<br>TC  |
| NM_025641    | <i>Uqcrh</i>   | GTGGACCCCTAACAACAGTG        | CGGGAAGACACGCGATTATCA        |
| NM_025352    | <i>Uqcrcq</i>  | CCTACAGCTTGTGCGCCCTTT       | GATCAGGTAGACCACTACAAA<br>CG  |
| NM_144940    | <i>Uroc1</i>   | ACATGCTCCGTTAGAACTCC        | CCAAACTGTCTTAGCTCCTGG        |
| NM_026430    | <i>Uxs1</i>    | CCAGAAATACCCGCCTGTAAA       | GTTTGTGAGTTAGATGGGAGC        |

|              |                | G                          | C                           |
|--------------|----------------|----------------------------|-----------------------------|
| NM_013933    | <i>Vapa</i>    | ATCCTGGTCCTCGACCCTC        | GCAGCATTACTGAAACAGTCA<br>CA |
| NM_019806    | <i>Vapb</i>    | ATGTCACTTCTGACCTCAGGAT     | GTGAACGAGTCCCACACCA         |
| NM_011690    | <i>Vars</i>    | GTCCAGCAGTGGGTCAGTTAT      | GCAGCAGTAAGGCTGTCCAC        |
| NM_175137    | <i>Vars2</i>   | ACATCCCTCTGTGGAGACTGG      | GCAGCTAGGTCCCCCATTTT        |
| NM_011694    | <i>Vdac1</i>   | CCCACATACGCCGATCTTGG       | GTGGTTTCCGTGTTGGCAGA        |
| NM_011695    | <i>Vdac2</i>   | CTCCACCCTATGCTGACCTC       | CCCGCTAACTTACCAGTGTCT       |
| NM_011696    | <i>Vdac3</i>   | CAAAGGGTATGGGTTTGGCAT      | TTGGTCTCTAGGTTGCCTGAT       |
| NM_001164488 | <i>Wars</i>    | GCTGGAAATGCACCAAAAGAT<br>G | GCTTGTCCGCACTGTCCAT         |
| NM_027462    | <i>Wars2</i>   | GTCCACACACGTTCTGTCTG       | GGACTTGGGCAATGGAAAGA<br>A   |
| NM_025375    | <i>Wbscr22</i> | GCATCTCGTAGCCGGAGAC        | CGTGAGTTGCGAACGTATTTCC      |
| NM_001177884 | <i>Whsc1</i>   | GGCCAGAACAAGCTCTTACAA      | TGTGGGCTCCCATAAAAGCTC       |
| NM_001001735 | <i>Whsc1l1</i> | TCCACTGGTGTTAAGTTCCAGG     | GGCACCTCTTGTGTTAATTTTG<br>G |
| NM_011723    | <i>Xdh</i>     | ATGACGAGGACAACGGTAGAT      | TCATACTGGAGATCATCACG<br>GT  |
| NM_001199568 | <i>Xylb</i>    | TCAGCACGCAGCAGGTTAAA       | CGCCCTGAGTTCCAAATTCC        |
| NM_178691    | <i>Yod1</i>    | GCCAAATCGCCGCTATCAC        | ATGTCCCGGTGCTGAGAT          |
| NM_023162    | <i>Znrd1</i>   | CCCCGCTCCAACCTTCAATCA      | AGAAGCCACAACGCGAACA         |

#### Urea cycle genes

|              |                |                            |                             |
|--------------|----------------|----------------------------|-----------------------------|
| NM_010324    | <i>Got1</i>    | GCGCCTCCATCAGTCTTTG        | ATTCATCTGTGCGGTACGCTC       |
| NM_010325    | <i>Got2</i>    | GGACCTCCAGATCCCATCCT       | GGTTTTCCGTTATCATCCCGGT<br>A |
| NM_007494    | <i>Ass1</i>    | ACACCTCCTGCATCCTCGT        | GCTCACATCCTCAATGAACAC<br>CT |
| NM_001080809 | <i>Cps1</i>    | ACATGGTGACCAAGATTCTCG      | TTCCTCAAAGGTGCGACCAAT       |
| NM_028122    | <i>Slc14a1</i> | TTAAAGTAGACCGGGTGAAA<br>AC | GATTCCACTGATGGGGTTGC        |
| NM_207651.3  | <i>Slc14a2</i> | AAGGAGATGTCTGACAGCAACA     | GGGCTGGGTGTGTATCCTG         |
